# Supplementary material for: Construction of a Matrix Cancer-Associated Fibroblast Signature Gene-Based Risk Prognostic Signature for Directing Immunotherapy in Patients with Breast Cancer Using Single-Cell Analysis and Machine Learning
Source: Int J Mol Sci. 2023 Aug 24;24(17):13175. doi: 10.3390/ijms241713175 (PMC10487765; doi:10.3390/ijms241713175)
Supplement: Supplementary file 1 [file ijms-24-13175-s001.zip › ijms-2537075-Supplementary.xlsx]

## Sheet: Table S1
Table S1. 101 machine learning model C-index
Model	TCGA test	GSE58812	GSE21653	METABRIC(TNBC)	mean
Lasso+plsRcox	0.6892	0.7164	0.7204	0.6107	0.6842
Lasso	0.6876	0.7164	0.7205	0.6111	0.6839
Lasso+StepCox[forward]	0.6876	0.7164	0.7205	0.6111	0.6839
RSF+StepCox[forward]	0.6574	0.7185	0.7165	0.641	0.6833
RSF+plsRcox	0.6571	0.7193	0.7157	0.6395	0.6829
Ridge	0.6526	0.7185	0.7155	0.6442	0.6827
plsRcox	0.6876	0.7185	0.715	0.6087	0.6824
RSF+Ridge	0.6437	0.7201	0.7183	0.6341	0.679
RSF+Enet[alpha=0.1]	0.6532	0.7229	0.7148	0.6241	0.6788
StepCox[backward]+superpc	0.5709	0.7527	0.7172	0.6732	0.6785
StepCox[both]+superpc	0.5709	0.7527	0.7172	0.6706	0.6778
CoxBoost+Ridge	0.6496	0.7241	0.7119	0.6235	0.6773
RSF+Enet[alpha=0.2]	0.6503	0.7221	0.7139	0.6213	0.6769
RSF+Enet[alpha=0.3]	0.6507	0.7229	0.7135	0.6192	0.6766
Enet[alpha=0.3]	0.6528	0.7184	0.7169	0.617	0.6763
Enet[alpha=0.4]	0.6528	0.7164	0.7209	0.6144	0.6761
Enet[alpha=0.1]	0.6528	0.7185	0.7203	0.6127	0.6761
Enet[alpha=0.7]	0.6528	0.7164	0.7205	0.6138	0.6759
Enet[alpha=0.8]	0.6526	0.7164	0.7205	0.6138	0.6758
RSF+Enet[alpha=0.4]	0.6507	0.7193	0.7132	0.6188	0.6755
CoxBoost+Enet[alpha=0.4]	0.6502	0.7217	0.7182	0.6115	0.6754
Enet[alpha=0.5]	0.6528	0.7164	0.7205	0.6117	0.6753
RSF+Lasso	0.6584	0.7168	0.7078	0.6168	0.675
Enet[alpha=0.6]	0.6528	0.7209	0.7151	0.6111	0.6749
CoxBoost+Enet[alpha=0.1]	0.6472	0.7233	0.716	0.6131	0.6749
Enet[alpha=0.2]	0.6528	0.7164	0.7181	0.6118	0.6748
CoxBoost+Enet[alpha=0.3]	0.6496	0.7205	0.7189	0.6089	0.6744
RSF+Enet[alpha=0.6]	0.6485	0.7189	0.7108	0.618	0.674
CoxBoost+Enet[alpha=0.6]	0.6504	0.718	0.7191	0.6075	0.6738
RSF+Enet[alpha=0.9]	0.6509	0.7176	0.7082	0.6178	0.6737
CoxBoost+Enet[alpha=0.7]	0.6514	0.7185	0.7164	0.6083	0.6736
RSF+Enet[alpha=0.5]	0.6442	0.7205	0.7117	0.6181	0.6736
Enet[alpha=0.9]	0.6437	0.7164	0.7205	0.6138	0.6736
CoxBoost+Enet[alpha=0.5]	0.6491	0.7189	0.7155	0.6106	0.6735
CoxBoost+Enet[alpha=0.2]	0.6468	0.7213	0.7168	0.6089	0.6734
RSF+Enet[alpha=0.7]	0.6497	0.7176	0.708	0.6182	0.6734
CoxBoost+Enet[alpha=0.9]	0.6508	0.718	0.7179	0.6068	0.6734
RSF+Enet[alpha=0.8]	0.6496	0.7172	0.7084	0.6172	0.6731
RSF+CoxBoost	0.6426	0.719	0.7278	0.602	0.6729
CoxBoost+StepCox[forward]	0.6526	0.7164	0.7178	0.6045	0.6728
CoxBoost+plsRcox	0.6522	0.7172	0.717	0.6046	0.6728
CoxBoost	0.6496	0.718	0.7167	0.6062	0.6726
CoxBoost+Lasso	0.6494	0.718	0.7167	0.6062	0.6726
CoxBoost+Enet[alpha=0.8]	0.6512	0.7172	0.7143	0.6062	0.6722
Lasso+CoxBoost	0.6481	0.7156	0.7089	0.6133	0.6715
RSF	0.6437	0.7168	0.7078	0.6168	0.6713
CoxBoost+StepCox[backward]	0.6523	0.6761	0.7057	0.6433	0.6694
CoxBoost+StepCox[both]	0.6523	0.6761	0.6962	0.6433	0.667
Lasso+StepCox[both]	0.6494	0.6761	0.6962	0.6367	0.6646
Lasso+StepCox[backward]	0.6494	0.6761	0.7057	0.6041	0.6588
RSF+Survival-Svm	0.6689	0.6548	0.6421	0.6543	0.655
StepCox[forward]	0.65	0.678	0.6843	0.6077	0.655
StepCox[both]+Ridge	0.6498	0.6786	0.6833	0.6077	0.6549
StepCox[backward]+Ridge	0.6497	0.6786	0.6819	0.608	0.6545
StepCox[both]+Enet[alpha=0.1]	0.6494	0.6778	0.6781	0.6085	0.6534
StepCox[backward]+Enet[alpha=0.1]	0.6494	0.6782	0.6771	0.6086	0.6533
CoxBoost+Survival-Svm	0.6594	0.5867	0.6857	0.6807	0.6531
StepCox[both]+Enet[alpha=0.2]	0.6479	0.6778	0.6769	0.6095	0.653
Lasso+Survival-Svm	0.6619	0.6193	0.6699	0.6603	0.6529
RSF+StepCox[backward]	0.6523	0.6761	0.6643	0.6158	0.6521
RSF+StepCox[both]	0.6523	0.6761	0.6643	0.6158	0.6521
StepCox[both]+Lasso	0.6504	0.6757	0.6671	0.6134	0.6517
StepCox[backward]+Enet[alpha=0.2]	0.6486	0.6761	0.6726	0.6085	0.6515
StepCox[backward]	0.6494	0.6761	0.6643	0.6158	0.6514
StepCox[both]	0.6494	0.6761	0.6643	0.6158	0.6514
StepCox[both]+Enet[alpha=0.3]	0.649	0.6782	0.6693	0.6091	0.6514
StepCox[backward]+Enet[alpha=0.3]	0.648	0.6774	0.6717	0.6084	0.6514
StepCox[backward]+Enet[alpha=0.4]	0.6482	0.677	0.6696	0.6101	0.6512
StepCox[backward]+Enet[alpha=0.8]	0.6497	0.677	0.6682	0.6098	0.6512
StepCox[backward]+Lasso	0.6508	0.6766	0.6657	0.6115	0.6511
StepCox[both]+Enet[alpha=0.4]	0.6487	0.677	0.6705	0.6079	0.651
StepCox[backward]+plsRcox	0.6494	0.6749	0.6642	0.6149	0.6508
StepCox[backward]+Enet[alpha=0.5]	0.6489	0.677	0.6697	0.6076	0.6508
StepCox[both]+Enet[alpha=0.7]	0.65	0.677	0.6656	0.6103	0.6507
StepCox[backward]+Enet[alpha=0.6]	0.6496	0.6753	0.6676	0.6101	0.6506
StepCox[backward]+Survival-Svm	0.6584	0.6093	0.7264	0.6081	0.6505
StepCox[both]+Survival-Svm	0.6584	0.6093	0.7264	0.6081	0.6505
StepCox[backward]+CoxBoost	0.6499	0.6741	0.6675	0.6103	0.6505
StepCox[both]+Enet[alpha=0.9]	0.6497	0.6757	0.6657	0.6103	0.6504
StepCox[backward]+Enet[alpha=0.9]	0.6481	0.6757	0.6673	0.6102	0.6503
StepCox[both]+CoxBoost	0.6479	0.6766	0.6665	0.6095	0.6501
StepCox[both]+Enet[alpha=0.6]	0.6487	0.6757	0.6655	0.6102	0.65
StepCox[both]+plsRcox	0.6494	0.6749	0.6642	0.6115	0.65
StepCox[both]+Enet[alpha=0.5]	0.6485	0.6766	0.6654	0.608	0.6496
StepCox[backward]+Enet[alpha=0.7]	0.648	0.6766	0.6656	0.6083	0.6496
StepCox[both]+Enet[alpha=0.8]	0.648	0.6749	0.6657	0.608	0.6491
Survival-Svm	0.6619	0.6383	0.6394	0.6565	0.649
CoxBoost+superpc	0.5587	0.712	0.6515	0.658	0.645
RSF+superpc	0.5796	0.7148	0.6213	0.6431	0.6397
StepCox[both]+GBM	0.6148	0.6991	0.62	0.62	0.6385
superpc	0.5802	0.712	0.6176	0.643	0.6382
StepCox[backward]+GBM	0.6109	0.6991	0.62	0.62	0.6375
StepCox[backward]+RSF	0.5892	0.7191	0.62	0.62	0.6371
StepCox[both]+RSF	0.5892	0.7191	0.62	0.62	0.6371
Lasso+superpc	0.5769	0.6834	0.6353	0.6526	0.6371
CoxBoost+RSF	0.6284	0.6776	0.62	0.62	0.6365
Lasso+GBM	0.6225	0.652	0.62	0.62	0.6286
RSF+GBM	0.6243	0.6483	0.62	0.62	0.6282
CoxBoost+GBM	0.6333	0.6353	0.62	0.62	0.6271
Lasso+RSF	0.6223	0.629	0.62	0.62	0.6228
GBM	0.6214	0.6149	0.62	0.62	0.6191

## Sheet: Table S2
Table S2. Cibersort result
Mixture	B cells naive	B cells memory	Plasma cells	T cells CD8	T cells CD4 naive	T cells CD4 memory resting	T cells CD4 memory activated	T cells follicular helper	T cells regulatory (Tregs)	T cells gamma delta	NK cells resting	NK cells activated	Monocytes	Macrophages M0	Macrophages M1	Macrophages M2	Dendritic cells resting	Dendritic cells activated	Mast cells resting	Mast cells activated	Eosinophils	Neutrophils	P-value	Correlation	RMSE	Group
TCGA-E9-A1NI	0	0	0.00751044	0.0245204	0	0.0866256	0	0.0498605	0.0140897	0.0248508	0	0.0130173	0	0.19294	0.0709258	0.284173	0.108479	0	0.109762	0	0	0.0132455	0	0.3337	0.94919	High-fibrotic
TCGA-A8-A06X	0.00805517	0.00271181	0.00733098	0.0722647	0	0.122266	0	0.0546143	0	0.0454104	0	0.0861841	0.00929427	0.172694	0.142808	0.236427	0	0	0.0399396	0	0	0	0	0.429414	0.903587	High-fibrotic
TCGA-D8-A1X9	0.0161078	0	0.0510503	0.0875901	0	0.211796	0.0130307	0.0690505	0.0277033	0	0	0.0256111	0.0485662	0.0551558	0.075436	0.153728	0.0270734	0.0684586	0.0662299	0	0	0.00341238	0	0.381312	0.924016	High-fibrotic
TCGA-AR-A24S	0.0662064	0	0.021332	0.0511594	0	0.202331	0.0224277	0.0278365	0.0234386	0	0	0.00447284	0.0190748	0.114138	0.0708825	0.150559	0.125857	0.00618062	0.0734833	0	0.00358104	0.017039	0	0.536304	0.855956	High-fibrotic
TCGA-AN-A041	0	0	0.128666	0.0382582	0	0.185557	0	0.030205	0.0184135	0.00457207	0	0.0177459	0.0361156	0.147117	0.0827107	0.196882	0.028284	0	0.0854737	0	0	0	0	0.358397	0.934112	High-fibrotic
TCGA-E9-A24A	0	0.0121539	0.00302288	0.080475	0	0.186859	0	0	0	0	0	0	0.0187958	0.0977614	0.0979302	0.405424	0.0168818	0	0.0540037	0	0	0.0266923	0	0.405776	0.914898	High-fibrotic
TCGA-BH-A1FM	0	0.00268186	0.0106388	0	0	0.141629	0.00746519	0	0.00469784	0	0.02723	0	0	0.14875	0.0510302	0.27093	0.150887	0	0.131601	0.00618526	0	0.0462734	0	0.352076	0.939254	High-fibrotic
TCGA-E9-A1N6	0	0.01099	0.00442649	0.12742	0	0.160842	0	0	0.0144867	0	0	0.0465329	0.0164351	0.222073	0.0380866	0.214018	0.000747558	0.0488846	0.0950573	0	0	0	0	0.388753	0.922331	High-fibrotic
TCGA-AO-A0JM	0	0.0154462	0.106735	0.119526	0	0.127293	0.0186209	0.0431845	0.00207746	0.0497806	0	0	0	0.213753	0.103013	0.133177	0.00961747	0.00137258	0.0564041	0	0	0	0	0.461596	0.88673	High-fibrotic
TCGA-A2-A25E	0.0749009	0	0.0746117	0.0380495	0	0.177287	0.0148538	0.10197	0	0.0280762	0	0	0.00139945	0.105025	0.0904226	0.179882	0.0341839	0.00479353	0.0745457	0	0	0	0	0.356875	0.934579	High-fibrotic
TCGA-BH-A18P	0.0536857	0	0.0839293	0.0680999	0	0.228404	0	0.0283553	0	0	0	0.0307744	0.0268472	0.122379	0.14905	0.0499808	0.048271	0	0.105968	0	0.00425516	0	0	0.38326	0.92381	High-fibrotic
TCGA-E9-A22B	0	0.0192914	0.0625323	0.0862121	0	0.118238	0	0.000262122	0.00061197	0.106269	0	0.0326676	0	0.127741	0.12701	0.141576	0.0117675	0	0.148818	0	0	0.0170032	0	0.355751	0.936437	High-fibrotic
TCGA-AN-A03X	0.0417201	0	0.0577283	0.0763129	0	0.130486	0	0.0422445	0	0	0	0.0216422	0.0841018	0	0.0570848	0.194322	0.038683	0.015044	0.210261	0	0.00839028	0.0219803	0	0.333889	0.943036	High-fibrotic
TCGA-A8-A099	0	0.00957052	0.046788	0.00841376	0	0.231836	0.0259029	0.0193015	0	0.0522453	0	0.017717	0.0537642	0.0300875	0.108412	0.211386	0.117668	0	0.0669074	0	0	0	0	0.271668	0.969539	High-fibrotic
TCGA-BH-A0DZ	0.00401927	0	0.130914	0.0800927	0	0.17831	0	0.022152	0	0	0	0.0506549	0.0117756	0.109873	0.153484	0.180542	0.0501031	0	0.0268842	0	0	0.00119509	0	0.492175	0.870865	High-fibrotic
TCGA-A8-A06Y	0.175494	0	0.0865756	0.0427243	0	0.048408	0	0.105066	0.00985592	0	0.00380416	0.0179178	0	0.0689676	0.0490978	0.219395	0.0126538	0.0829384	0.0771019	0	0	0	0	0.165063	1.01746	High-fibrotic
TCGA-D8-A1J8	0.0232739	0	0.0206672	0.140378	0	0.165089	0.0849542	0.064187	0.0015467	0.00946907	0	0.0297443	0	0.107746	0.0817208	0.150685	0	0.044919	0.0383983	0	0.00442483	0.0327966	0	0.478118	0.878876	High-fibrotic
TCGA-A2-A0ER	0	0.0222593	0.143376	0.011599	0	0.27614	0	0.000548556	0.00819801	0.00219768	0	0.0159739	0.00245775	0.0209372	0.0772584	0.166325	0.0868606	0.0136447	0.127054	0	0.0126224	0.0125476	0	0.330468	0.944964	High-fibrotic
TCGA-A2-A1G1	0.034655	0.0281206	0.0462419	0.114708	0	0.106194	0.141677	0.0566081	0	0	0	0.0144956	0.0101323	0.0484429	0.13923	0.145767	0.0752895	0.0180508	0.0136776	0	0	0.00670972	0	0.515175	0.861622	High-fibrotic
TCGA-E2-A1LB	0	0.00996797	0.253437	0.101376	0	0.12057	0.013875	0	0	0	0	0.0213257	0.00326988	0.026856	0.0258269	0.319919	0.00677408	0	0.0968023	0	0	0	0	0.363069	0.93533	High-fibrotic
TCGA-E9-A1RD	0.0397361	0	0.102395	0.0666543	0	0.175461	0	0.0309985	0.00750191	0	0	0.0188682	0.0745437	0	0.05883	0.23041	0.072741	0.00516291	0.10723	0	0	0.00946707	0	0.266683	0.969496	High-fibrotic
TCGA-E9-A1R3	0.0272497	0.00253241	0.032343	0.033849	0	0.212287	0.000672459	0.0488787	0.016571	0	0	0	0.0208619	0.0442344	0.0789905	0.185852	0.159659	0.0447874	0.0729392	0	0	0.0182917	0	0.440046	0.898406	High-fibrotic
TCGA-A8-A086	0.0340997	0	0.0579203	0.0658054	0	0.162616	0	0	0.0306028	0	0	0.00414607	0.0582412	0.0609552	0.0671553	0.298425	0.0088344	0	0.11981	0	0	0.0313887	0	0.295399	0.960037	High-fibrotic
TCGA-BH-A1F5	0.0328039	0	0.0803835	0.00744323	0	0.318292	0.000193907	0	0	0	0.00781297	0	0.00551056	0	0.0551505	0.176343	0.119428	0	0.169041	0.0204906	0	0.00710724	0	0.264531	0.971798	High-fibrotic
TCGA-BH-A1FG	0.00195897	0	0.0950391	0.0900869	0	0.133424	0.00350522	0.0211409	0	0.0527519	0	0.0111647	0.0291918	0.00935801	0.0868325	0.18933	0.0326224	0.00841933	0.231698	0	0	0.00347567	0	0.308703	0.954846	High-fibrotic
TCGA-AR-A24Z	0.0410267	0	0.109836	0.0226877	0	0.128865	0.0656345	0	0	0.0532595	0	0	0	0.17962	0.0683702	0.23997	0	0.00380813	0.0631629	0	0	0.023758	0	0.291531	0.963713	High-fibrotic
TCGA-AC-A23C	0	0.0355383	0.178764	0.0792471	0	0.162051	0.053847	0	0.0179825	0.0482529	0	0.0108823	0.00482073	0.0630477	0.0722871	0.117496	0.0115332	0.0357312	0.10852	0	0	0	0	0.455992	0.89042	High-fibrotic
TCGA-D8-A1XO	0.0531263	0	0.055507	0.0818362	0	0.269876	0.00724574	0.00731766	0	0	0	0.0151249	0.080947	0	0.0391319	0.167902	0.076145	0.0477674	0.0916354	0	0	0.00643757	0	0.315662	0.950577	High-fibrotic
TCGA-AN-A0FY	0.0888454	0	0.0218963	0.0905257	0	0.168211	0.00738343	0.0641924	0.0297258	0	0	0.0246201	0.0637237	0.0721969	0.0880505	0.183346	0.0616097	0.00621058	0.0294628	0	0	0	0	0.290722	0.963112	High-fibrotic
TCGA-EW-A1IY	0.0566562	0	0.0431211	0.125512	0	0.188953	0.0614325	0.0338158	0.00961315	0.0309758	0	0.0500569	0	0.00852422	0.0913995	0.105007	0.0919168	0.0248021	0.0782138	0	0	0	0	0.531068	0.853621	High-fibrotic
TCGA-AO-A0JE	0.0177349	0.00150784	0.093904	0.110792	0	0.0989004	0.046493	0.0456601	0.0332777	0.0240334	0	0.070326	0.00942878	0.0434284	0.10893	0.11905	0.0596191	0.0216567	0.0791665	0	0	0.0160914	0	0.516792	0.861557	High-fibrotic
TCGA-BH-A1FN	0	0.000980693	0.0546084	0.066408	0	0.0686579	0	0.122829	0.0305543	0	0	0.0637209	0.00192921	0.308347	0.135635	0.0988603	0.0026116	7.91517e-05	0.0110027	0	0.02194	0.0118362	0	0.345914	0.948029	High-fibrotic
TCGA-BH-A0BF	0.078058	0	0.103287	0.085072	0	0.103414	0.0747477	0.0300569	0.0036911	0.0296457	0	0.0409	0.0156609	0.0384259	0.0797506	0.152119	0	0.0322378	0.130537	0	0	0.00239584	0	0.610919	0.819802	High-fibrotic
TCGA-A8-A08P	0.022221	0	0.081792	0.125745	0	0.150183	0.0638804	0.0229577	0.0366871	0	0	0.0172914	0.0160716	0.133063	0.0892109	0.142304	0.0317872	0.00202414	0.045469	0	0	0.0193132	0	0.560251	0.841653	High-fibrotic
TCGA-E2-A1IN	0.0518618	0	0.061034	0.0259529	0	0.225316	0	0.0448007	0	0	0	0.0101751	0.102513	0	0.0494973	0.228429	0	0.0455983	0.147656	0	0	0.00716655	0	0.306066	0.954312	High-fibrotic
TCGA-BH-A0BV	0.00534931	0.000253963	0.087664	0.100782	0	0.156833	0.00911219	0	0.0287006	0.114577	0	0.0072393	0	0.127027	0.092519	0.151291	0.0194085	0	0.0992433	0	0	0	0	0.420096	0.906637	High-fibrotic
TCGA-E2-A1IH	0.00837282	0.0602726	0.0666432	0.131986	0	0.181002	0.0267401	0.0357581	0.0135087	0.0544854	0	0.0338648	0.0129619	0.0871682	0.0730546	0.0987069	0.0300243	0.0158609	0.0695898	0	0	0	0	0.570649	0.834038	High-fibrotic
TCGA-E9-A1RH	0.00867914	0	0.136669	0.0431907	0	0.151777	0.0210638	0	0	0	0	0.0416686	0.0196286	0.149601	0.145615	0.0826186	0.123372	0	0.0730287	0	0.00201514	0.00107256	0	0.360059	0.934321	High-fibrotic
TCGA-A8-A085	0	0.00505484	0.00249427	0	0	0.0839345	0	0.00105041	0.0222585	0	0.0230803	0.00757207	0	0.348136	0.0110193	0.276336	0	0	0.219063	0	0	0	0	0.262581	1.00062	High-fibrotic
TCGA-BH-A0GY	0.0753821	0	0.109669	0.0460138	0	0.150338	0	0.000902399	0	0.0104395	0	0.0408877	0.032503	0.157455	0.0732791	0.107146	0.0139328	0.0453396	0.125894	0	0	0.0108177	0	0.478043	0.880903	High-fibrotic
TCGA-EW-A1PE	0.0267146	0	0.13485	0.122695	0	0.0921331	0.0424868	0.0169213	0.00264353	0	0	0.0428931	0.0154587	0.0835417	0.0901879	0.164163	0	0.055974	0.0848171	0	0.000402079	0.0241181	0	0.487605	0.876104	High-fibrotic
TCGA-A8-A07B	0.0180516	0	0.0501795	0.0584504	0	0.223496	0.0277328	0.0466329	0.00895426	0.00707705	0	0.0102194	0.0526821	0.00793662	0.0784778	0.232109	0.0122956	0.0244538	0.133676	0	0	0.00757564	0	0.264683	0.971868	High-fibrotic
TCGA-AR-A0TT	0.0751042	0	0.123004	0.0926601	0	0.154735	0.0634186	0.0235078	0.0336413	0.00966104	0	0.0306105	0.0205657	0.0665423	0.0805346	0.134239	0.0134817	0.00381918	0.0692209	0	0	0.00525437	0	0.614559	0.814967	High-fibrotic
TCGA-BH-A0DD	0.0352511	0	0.0414727	0.118499	0	0.217961	0.0183631	0.0809406	0.00952061	0	0	0.0196329	0.000272899	0.119581	0.0949646	0.150804	0.0107374	0.0252606	0.0468524	0	0	0.00988571	0	0.325608	0.950997	High-fibrotic
TCGA-AR-A24N	0.0432525	0	0.214897	0.0174421	0	0.175787	0	0.0670794	0	0	0.00968461	0.011323	0	0.0784798	0.075472	0.167866	0.00899407	0.038676	0.0710868	0	0.0199591	0	0	0.403471	0.914712	High-fibrotic
TCGA-D8-A1XU	0.016094	0	0.109951	0.0496312	0	0.232771	0	0	0.0444585	0	0	0	0.0653708	0	0.0804338	0.171764	0.0996231	0	0.118394	0	0	0.0115076	0	0.311402	0.952182	High-fibrotic
TCGA-A8-A06R	0	0.0146732	0.210312	0.0555776	0	0.178407	0.0195967	0.0350233	0.0156388	0	0	0.0274127	0.00679758	0.117068	0.0953902	0.149825	0.00830495	0.006297	0.0588191	0	0	0.000856723	0	0.552611	0.8409	High-fibrotic
TCGA-E2-A1BC	0.0385783	0.00943292	0.0686511	0.107538	0	0.24384	0	0	0	0	0	0.0239361	0.0272405	0.0834631	0.102262	0.0627435	0.145415	0	0.0868996	0	0	0	0	0.239143	0.983727	High-fibrotic
TCGA-BH-A1ET	0	0.0396334	0.150601	0.122294	0	0.201377	0	0	0	0.0423826	0	0	0.00948055	0.0444591	0.0944125	0.0860593	0.023187	0	0.186113	0	0	0	0	0.303918	0.95954	High-fibrotic
TCGA-D8-A1JE	0.000505682	0.00180938	0.00816186	0.116939	0	0.175157	0.0246151	0.0439794	0.00707246	0	0	0	0	0.00845969	0.073593	0.344246	0.0267215	0.0304794	0.115617	0	0	0.0226428	0	0.342542	0.941711	High-fibrotic
TCGA-A2-A0EM	0.0114311	0.00245674	0.0260023	0.0395002	0	0.157303	0	0	0.00129763	0	0	0.046807	0.0306895	0.0868008	0.0260051	0.256641	0.0643356	0.0445136	0.206216	0	0	0	0	0.28228	0.966215	High-fibrotic
TCGA-AN-A049	0.0335613	0.00986612	0.0799136	0.0539004	0	0.196582	0	0	0.0417517	0.0379385	0	0	0	0.105646	0.0801183	0.207088	0.0374586	0.0310583	0.0847888	0	0	0.00032792	0	0.447449	0.894739	High-fibrotic
TCGA-A8-A07I	0.0173832	0.0428825	0.102132	0.0723745	0	0.185935	0	0	0.00068024	0.0122688	0	0.0335298	0.0093074	0.148461	0.0973695	0.165619	0.0140262	0.015384	0.0736595	0	0	0.00898875	0	0.502883	0.868105	High-fibrotic
TCGA-B6-A1KI	0.0614654	0	0.139082	0.0394012	0	0.188	0	0.0200334	0.00361781	0	0	0.0330407	0	0.125517	0.0699617	0.167647	0	0	0.149578	0	0	0.0026559	0	0.190841	1.00477	High-fibrotic
TCGA-BH-A0BR	0.0127812	0	0.0525461	0.0950657	0	0.133461	0	0.0909455	0.000472926	0	0	0.0342732	0.00254727	0.0991135	0.0744815	0.198665	0.0473954	0.0312694	0.09836	0	0	0.0286222	0	0.467414	0.885902	High-fibrotic
TCGA-A8-A07G	0.0288738	0.0552123	0.0719569	0.0660554	0	0.224473	0	0	0.00272754	0.0213408	0	0.0281543	0.00142555	0.148191	0.0767752	0.103782	0.0660602	0	0.104971	0	0	0	0	0.407249	0.912623	High-fibrotic
TCGA-A8-A084	0.106793	0	0.0604947	0.00238303	0	0.175626	0	0.0499408	0.0147555	0	0	0.0161048	0	0.14106	0.0706838	0.106203	0.0953541	0.00876946	0.0662308	0	0	0.0856011	0	0.22797	0.987884	High-fibrotic
TCGA-A8-A09I	0.0336871	0	0.0924771	0.034459	0	0.0858541	0.0316061	0.0639162	0.00358053	0.0170205	0	0.0371952	0.00543048	0.0557744	0.142573	0.271266	0.0327596	0.0235924	0.0483921	0	0	0.0204166	0	0.499026	0.868645	High-fibrotic
TCGA-A7-A26H	0.0369877	0	0.051226	0.064857	0	0.19482	0	0.0470257	0	0	0	0.0206488	0.0126037	0.124886	0.0864009	0.158308	0.0661022	0.0390113	0.0885436	0	0	0.00857818	0	0.461795	0.888359	High-fibrotic
TCGA-AC-A23H	0	0	0.0990047	0.0235337	0	0.123894	0	0.0255134	0.0137136	0.0139004	0	0.0270918	0	0.223122	0.110106	0.188702	0.0565169	0	0.0887238	0	0	0.0061786	0	0.313137	0.956891	High-fibrotic
TCGA-E2-A10E	0.0744598	0	0.0106907	0.0551981	0	0.203264	0.0127587	0.0962236	0	0.0324121	0	0.0208046	0.0061644	0.0455277	0.115757	0.121608	0.129965	0.015926	0.0549553	0	0	0.00428589	0	0.330568	0.946829	High-fibrotic
TCGA-EW-A6S9	0	0.0524596	0.137352	0	0	0.151601	0	0.05161	0	0	0	0.023047	0.0496367	0.0663593	0.0681702	0.198492	0.0266075	0.0301136	0.144551	0	0	0	0	0.411339	0.911174	High-fibrotic
TCGA-A2-A25B	0	0.0116337	0.147854	0.117114	0	0.176685	0	0.00381483	0.0214932	0	0	0.00236175	0.0121274	0.11849	0.127889	0.16553	0	0.00534212	0.0675622	0	0.00357801	0.0185253	0	0.426989	0.903414	High-fibrotic
TCGA-EW-A1P5	0	0.0352149	0	0	0	0.131229	0.0353548	0	0.0146339	0.0630534	0	0	0.010437	0.166312	0.12072	0.225621	0.00543427	0.0543774	0.129071	0	0	0.00854221	0	0.438925	0.897753	High-fibrotic
TCGA-E2-A1IE	0	0	0.132073	0.0727908	0	0.233848	0	0.0156505	0.0139524	0	0	0.00534401	0.00751436	0.247983	0.0277909	0.109772	0.010398	0	0.122883	0	0	0	0	0.186071	1.01199	High-fibrotic
TCGA-D8-A27N	0.0331774	0	0.132906	0.0269776	0	0.198466	0	0	0.0122021	0.00423433	0	0.0424025	0	0.121284	0.0788819	0.199014	0.0252753	0	0.122182	0	0	0.00299606	0	0.505581	0.868133	High-fibrotic
TCGA-A2-A0CT	0.0846009	0	0.048526	0.0616805	0	0.129299	0	0.0167292	0	0.00715995	0	0.0243224	0.0610763	0.0253305	0.0653243	0.18597	0.0436188	0.00193947	0.22566	0	0.0187626	0	0	0.303229	0.955849	High-fibrotic
TCGA-A8-A09R	0	0.00277791	0.0910841	0.0932055	0	0.115798	0.0317325	0.0225161	0.0125127	0	0	0.062234	0.00999419	0.179691	0.120159	0.1206	0.0111292	0	0.116809	0	0	0.00975596	0	0.428629	0.902677	High-fibrotic
TCGA-E9-A22A	0.0179099	0	0.091109	0.118439	0	0.146993	0.0335645	0.00805719	0.013725	0	0	0.0652436	0.00930596	0.078189	0.0726731	0.104944	0.0307516	0.0354645	0.147432	0	0	0.0261995	0	0.515897	0.864255	High-fibrotic
TCGA-BH-A1FD	0	0	0.121363	0	0	0.23763	0.0151837	0.0686314	0	0	0.00296349	0	0.0390239	0.137881	0.078042	0.224724	0	0.0231588	0.0245399	0.00124235	0	0.0256166	0	0.340212	0.942984	High-fibrotic
TCGA-E2-A10A	0.019265	0	0.104712	0.00216748	0	0.202502	0	0.00768375	0.013491	0.00882216	0	0.0406379	0	0.169222	0.0653565	0.274094	0.0216883	0.00770671	0.0400717	0	0.00817285	0.0144061	0	0.347799	0.940228	High-fibrotic
TCGA-A8-A0AD	0	0.00744451	0.0114131	0.0394892	0	0.224444	0	0	0	0	0	0.0173892	0.134033	0.0132567	0.0579803	0.303988	0	0.0168255	0.127061	0	0	0.0466754	0	0.335358	0.944377	High-fibrotic
TCGA-A8-A09D	0.0467823	0	0.050931	0.0780096	0	0.187347	0.00676908	0.0134431	0.0310853	0	0	0.0147647	0.0296285	0.146498	0.0782619	0.166533	0.0556504	0.00138192	0.0794279	0	0	0.0134863	0	0.460705	0.888928	High-fibrotic
TCGA-BH-A0H9	0.0147114	0.0284278	0.0824511	0.0766968	0	0.274945	0	0	0.00535166	0.00354339	0	0	0.00458063	0.19951	0.0991966	0.126917	0.0224189	0	0.0612501	0	0	0	0	0.314606	0.95576	High-fibrotic
TCGA-E2-A152	0	0	0.113675	0.0224096	0	0.249436	0	0	0.00905411	0	0	0.0350767	0.00440088	0.129311	0.0764025	0.236044	0	0	0.103673	0	0	0.0205174	0	0.355154	0.935635	High-fibrotic
TCGA-BH-A18N	0	0.0152514	0.0154084	0.0368529	0	0.130468	0	0.0313867	0.0120032	0	0	0.0200611	0	0.0953124	0.0758101	0.406296	0.0250909	0	0.103211	0	0	0.032848	0	0.253806	0.984868	High-fibrotic
TCGA-C8-A1HN	0.0058856	0	0.0579399	0.0968973	0	0.166245	0	0.0657242	0	0	0	0.0163113	0.0777114	0.0494143	0.0639475	0.293218	0.0227263	0	0.0531513	0	0.0230813	0.00774655	0	0.297339	0.959858	High-fibrotic
TCGA-AN-A0FK	0.0329061	0	0.182178	0.131393	0	0.0227953	0.0117066	0.019423	0.0529299	0	0	0.027919	0.00626344	0.144907	0.0930372	0.173324	0.0126066	0	0.0886102	0	0	0	0	0.362076	0.93373	High-fibrotic
TCGA-D8-A1JF	0.00839609	0.0477153	0.208518	0	0	0.168967	0.0377447	0.00524136	0.0183233	0.0162795	0.0283844	0	0.012481	0.104992	0.0748762	0.143984	0.0271571	0	0.0967525	0	0.000187498	0	0	0.492297	0.872965	High-fibrotic
TCGA-AR-A2LK	0.0254305	0	0.0706514	0.0191743	0	0.161118	0	0.0283072	0.0270592	0.0100924	0	0.0411506	0.0160185	0.127392	0.0422674	0.222262	0.042709	0	0.152337	0	0	0.0140312	0	0.355894	0.934631	High-fibrotic
TCGA-AR-A254	0.0310971	0	0.0973926	0.0598186	0	0.230024	0.0664868	0	0	0.0131092	0	0.00422214	0.00878105	0.142254	0.0871667	0.171339	0.0265462	0.0108749	0.0323055	0	0	0.0185816	0	0.536222	0.853052	High-fibrotic
TCGA-S3-A6ZF	0.116655	0	0.0506186	0.0548161	0	0.252018	0.00999097	0	0.0121722	0.00314165	0	0.0183554	0.00926622	0.0527346	0.0810423	0.145565	0.0164965	0.0435226	0.13329	0	0.000257745	5.71246e-05	0	0.448681	0.894022	High-fibrotic
TCGA-AN-A0FV	0	0.000116595	0.0168408	0	0	0.128196	0	0.0288706	0.0483094	0	0	0	0	0.293598	0.0832479	0.233101	0.00402905	0	0.14735	0	0	0.0163408	0	0.317529	0.961249	High-fibrotic
TCGA-AN-A0XP	0.0149837	0	0.0846751	0.0513773	0	0.158511	0	0.0280467	0.00550463	0	0.0100561	0	0	0.0843032	0.0638957	0.333702	0	0.0244701	0.0902078	0	0	0.050266	0	0.246187	0.982362	High-fibrotic
TCGA-A8-A08Z	0	0.0159567	0.0266207	0.0638256	0	0.216167	0	0	0.0241907	0	0	0.00689364	0.0343432	0.155505	0.0659943	0.215718	0.0311625	0	0.132428	0	0	0.0111947	0	0.461095	0.888281	High-fibrotic
TCGA-E9-A226	0	0	0.0870411	0.0145468	0	0.292362	0	0.0723786	0	0	0	0.0163377	0.0214089	0.0607004	0.059816	0.238278	0.00306499	0.0426905	0.0904451	0	0	0.00093002	0	0.240643	0.983832	High-fibrotic
TCGA-E9-A1NG	0	0	0.00922388	0.0583822	0	0.24868	0	0	0.0375931	0	0	0.0248746	0.0220223	0.0537071	0.0340644	0.27047	0.124023	0.0267772	0.0582992	0.0026453	0	0.0292374	0	0.434565	0.900253	High-fibrotic
TCGA-E2-A15L	0.030021	0	0.164075	0.0152572	0	0.153302	0	0.0308176	0	0	0	0.0178559	0.0785225	0.0937435	0.0625883	0.219564	0.0131589	0	0.114753	0	0.00634065	0	0	0.29088	0.962502	High-fibrotic
TCGA-EW-A1P6	0.00298233	0.0543115	0.195062	0.0263908	0	0.164891	0	0	0	0.0199485	0	0.0308702	0.00403795	0.0833031	0.084527	0.114089	0.0477162	0	0.17187	0	0	0	0	0.357294	0.935479	High-fibrotic
TCGA-A8-A06P	0	0.014234	0.111295	0.0939559	0	0.138591	0	0.0200139	0.029209	0	0	0.0168734	0.0753793	0.0683872	0.0424023	0.187086	0.0103891	0	0.177253	0	0	0.0149302	0	0.370323	0.928445	High-fibrotic
TCGA-AR-A0TY	0.0698037	0.0431652	0.145535	0.032396	0	0.139567	0	0.00543495	0	0.0116879	0	0.0248539	0	0.167698	0.0271327	0.215349	0	0	0.116634	0	0	0.000741938	0	0.405482	0.913966	High-fibrotic
TCGA-A2-A0YG	0.0800156	0	0.0829443	0.0463597	0	0.22127	0.0344142	0.0486479	0	0.00553719	0	0	0.0017007	0.0879871	0.105696	0.180176	0.00768255	0	0.0947198	0	0	0.00284834	0	0.328562	0.946996	High-fibrotic
TCGA-AR-A250	0.000575184	0.0076755	0.0464852	0.0400535	0	0.249268	0.00601129	0	0.00283331	0	0	0.0665837	0.0050534	0.15941	0.107018	0.136981	0	0	0.1666	0	0	0.0054523	0	0.433995	0.900204	High-fibrotic
TCGA-AO-A12G	0.0467363	0	0.105581	0.0969788	0	0.148907	0	0.036889	0.0248935	0.0254823	0	0.0267735	0.0169906	0.0172628	0.0950612	0.156836	0.040004	0	0.161604	0	0	0	0	0.377837	0.925326	High-fibrotic
TCGA-BH-A1EY	0.0378019	0.0198147	0	0.0785658	0	0.242643	0	0	0.00767583	0.00301157	0	0.0382753	0	0.0806465	0.106932	0.184877	0.0668631	0.00204058	0.123956	0	0	0.00689636	0	0.51453	0.862579	High-fibrotic
TCGA-AO-A03P	0.0262753	0	0.11072	0.0898186	0	0.123506	0.00307841	0.0593726	0.00538755	0.00410565	0	0.0336205	0	0.108526	0.100571	0.172446	0.0360229	0.00219204	0.124357	0	0	0	0	0.357001	0.934406	High-fibrotic
TCGA-EW-A1PD	0.0582578	0	0.0538559	0.0906332	0	0.158677	0	0.0314486	0	0	0	0.0250297	0.0209112	0.248324	0.100823	0.152787	0.0306057	0	0.0274307	0	0.00121621	0	0	0.337312	0.946809	High-fibrotic
TCGA-BH-A1EN	0.0196896	0	0.0172063	0.0963498	0	0.227278	0.00136203	0.022475	0	0	0	0.00544798	0.0536981	0.0321651	0.0519196	0.339672	0.00169336	0.0288401	0.0952888	0	0	0.00691494	0	0.160535	1.01839	High-fibrotic
TCGA-C8-A12Q	0.0165233	0.041029	0.069252	0.022775	0	0.192262	0	0.0394082	0	0.0032995	0	0.0313059	0.0235615	0.124674	0.0868388	0.164228	0.0559386	0.0212709	0.107634	0	0	0	0	0.44824	0.895018	High-fibrotic
TCGA-E9-A1RI	0.0180221	0	0.136666	0.0281513	0	0.273444	0.0108361	0.00172094	0.0141468	0.0399812	0	0	0.0291006	0.0620674	0.0665221	0.1706	0.0311992	0.0112756	0.106267	0	0	0	0	0.397228	0.917084	High-fibrotic
TCGA-C8-A26V	0	0.00275629	0.0741082	0	0	0.177286	0	0	0.0178333	0.00572457	0	0.0470288	0	0.214027	0.0825933	0.151489	0.0781041	0.0306079	0.11802	0	0	0.000422082	0	0.338679	0.943712	High-fibrotic
TCGA-D8-A1JP	0.000995285	0	0.0395085	0.078787	0	0.167381	0.0267841	0	0.00660185	0.047323	0	0.0296583	0	0.108921	0.106391	0.194552	0.0546142	0	0.125976	0	0	0.0125066	0	0.385941	0.921994	High-fibrotic
TCGA-BH-A0E2	0.0322988	0	0.105577	0.108157	0	0.154196	0	0.049141	0.0155189	0.0524363	0	0.0261842	0	0.0998007	0.0755811	0.121839	0.0202163	0	0.139053	0	0	0	0	0.382957	0.923303	High-fibrotic
TCGA-LL-A740	0.0147324	0	0.0561267	0.0207802	0	0.154002	0.00684062	0.0269365	0.0458643	0	0.0157152	0.000418751	0.0277104	0.126121	0.0547897	0.152479	0.17576	0.024773	0.0816193	0	0.013067	0.00226386	0	0.472639	0.884916	High-fibrotic
TCGA-D8-A1X7	0.0500641	0.0338329	0.032788	0	0	0.252636	0.0152829	0.028008	0.00509981	0.0182067	0.00166643	0	0	0.117832	0.070883	0.245339	0.0107467	0	0.0956321	0	0	0.021982	0	0.326741	0.94751	High-fibrotic
TCGA-D8-A1X5	0	0.00599129	0.160168	0.0212257	0	0.206689	0.0103573	0	0.0307392	0.0252816	0	0.0395565	0.0646876	0.051368	0.0899031	0.196897	0.0119733	0	0.0678618	0	0	0.0173008	0	0.375683	0.926334	High-fibrotic
TCGA-E9-A22E	0.0338739	0	0.0544696	0.178618	0	0.178935	0.00730416	0.0468924	0.0550329	0	0	0.0195039	0	0.0850648	0.0979508	0.152761	0	0.000863675	0.0886738	0	0	5.6021e-05	0	0.458411	0.888077	High-fibrotic
TCGA-AC-A23E	0	0.00430416	0.0280084	0.0261657	0	0.167112	0	0.0186508	0.00357267	0	0.0109733	0	0.0724162	0.120059	0.0679539	0.29039	0.0108908	0	0.141096	0	0	0.0384086	0	0.396803	0.917569	High-fibrotic
TCGA-AR-A0U2	0.044551	0	0.0497672	0.129598	0	0.17191	0.0736668	0	0	0.0251606	0	0.00507752	0.0267666	0.0805413	0.097156	0.182607	0.0137255	0.00586207	0.0899997	0	0.00361075	0	0	0.448483	0.894417	High-fibrotic
TCGA-AN-A0XO	0.00363128	0	0.127022	0.0310443	0	0.121839	0	0.011527	0.023282	0	0	0.0326003	0	0.239141	0.0334484	0.118013	0.116883	0.0225829	0.0744467	0	0	0.04454	0	0.230925	0.990993	High-fibrotic
TCGA-AR-A24P	0.055154	0	0.138802	0.0316166	0	0.236728	0	0.0273552	0	0	0	0	0.0799705	0.0396045	0.0835181	0.169416	0.0327461	0.0448743	0.055478	0	0	0.00473643	0	0.359703	0.933311	High-fibrotic
TCGA-AN-A0AM	0.0210979	0	0.112337	0.140219	0	0.118754	0.0467953	0.0641066	0.0510571	0	0	0.0281316	0.0122075	0.0572466	0.0960534	0.159184	0.0242214	0.0166142	0.0418628	0	0	0.0101109	0	0.426188	0.903795	High-fibrotic
TCGA-B6-A1KN	0.123053	0	0.0885376	0.172487	0	0.164163	0.025909	0	0	0	0	0	0.00803536	0.0747113	0.0828202	0.0824925	0	0.102154	0.0667951	0	0	0.00884233	0	0.38605	0.922912	High-fibrotic
TCGA-BH-A0H0	0.000492904	0	0.115718	0	0	0.193076	0.00581683	0.0395238	0.00691899	0.037542	0	0.0494018	0.00961155	0	0.103464	0.188367	0.0151032	0	0.234963	0	0	0	0	0.312052	0.954644	High-fibrotic
TCGA-C8-A12P	0.0474836	0	0.112644	0.0897158	0	0.165025	0.0170152	0.0357691	0.0236444	0	0	0.0107623	0.0845882	0.126233	0.0755835	0.13367	0	0.0252553	0.0526108	0	0	0	0	0.453017	0.892202	High-fibrotic
TCGA-A2-A0EV	0.006396	0.00240926	0.085907	0.106509	0	0.213344	0	0.0194444	0.0146516	0.0127618	0	0.0189882	0.0278641	0.0812467	0.0768639	0.160341	0.0108624	0.0418299	0.116835	0	0	0.0037458	0	0.45706	0.890371	High-fibrotic
TCGA-A8-A075	0.0444194	0	0.165778	0.122098	0	0.136049	0.0395065	0.0306297	0.0209715	0	0	0.00848234	0	0.0842411	0.0782386	0.1477	0.0731376	0	0.0325571	0	0	0.0161913	0	0.529673	0.855078	High-fibrotic
TCGA-AN-A0FZ	0.0626707	0	0.0884915	0.0436267	0	0.0937621	0	0.0458756	0.0309437	0	0	0	0	0.208291	0.0703114	0.306007	0	0	0.0318147	0	0	0.0182055	0	0.225014	1.00017	High-fibrotic
TCGA-D8-A1XJ	0.0172721	0	0.0646677	0.0237205	0	0.147852	0	0.0521987	0.0409976	0	0	0.0169112	0.0215054	0.149365	0.0902847	0.222852	0.0529704	0.00410617	0.0727227	0	0	0.0225734	0	0.294456	0.961846	High-fibrotic
TCGA-BH-A18K	0.030377	0	0.0631551	0.0541516	0	0.144964	0	0.0718604	0.0113154	0	0	0.01201	0	0.0804169	0.0719338	0.194431	0.120633	0.0151397	0.091132	0	0	0.0384796	0	0.347937	0.937489	High-fibrotic
TCGA-A8-A0A2	0.0344258	0	0.144786	0.128879	0	0.184079	0	0.0497181	0.0145683	0	0	0.0247578	0.107775	0	0.0602226	0.153606	0	0.0150062	0.082177	0	0	0	0	0.396234	0.917484	High-fibrotic
TCGA-A8-A0A9	0	0	0	0.0779177	0	0.179139	0	0	0.0254558	0	0	0.068273	0.020102	0.219315	0.115077	0.110215	0.0168081	0	0.157721	0	0.00472898	0.00524769	0	0.368092	0.932436	High-fibrotic
TCGA-E2-A14V	0.0519658	0	0.0426962	0.00461425	0	0.166685	0.0130467	0.0345018	0.0233362	0.0454647	0	0.0308634	0	0.121675	0.101437	0.0904609	0.0770599	0	0.196193	0	0	0	0	0.288504	0.962776	High-fibrotic
TCGA-D8-A13Z	0.0728263	0.00630281	0.0672809	0.0840894	0	0.0837969	0.0278849	0.0452121	0.0222509	0	0	0	0.0250528	0.129633	0.0860812	0.159665	0.0849085	0.0534809	0.0463616	0	0.00517301	0	0	0.566773	0.839814	High-fibrotic
TCGA-D8-A1XV	0.0328576	0	0.0105249	0.0102551	0	0.153917	0.00229269	0.0285635	0.0254432	0.00898902	0	0.00370697	0.1502	0.0919827	0.0836909	0.286377	0.0150325	0	0.0865696	0	0.0089223	0.000675492	0	0.20193	1.00192	High-fibrotic
TCGA-AN-A0FT	0	0.00406525	0.03565	0.146277	0	0.169313	0	0.044928	0.00122064	0.00600828	0	0.0401355	0.0435503	0.0763043	0.0890326	0.204461	0.00293224	0	0.112998	0	0.0231245	0	0	0.321854	0.950342	High-fibrotic
TCGA-B6-A0IG	0.0321333	0	0.238057	0.0915665	0	0.194608	0	0	0.0062619	0	0	0	0.0230028	0.160097	0.115811	0.0232323	0	0.0604081	0.0535551	0	0.00126749	0	0	0.426042	0.905455	High-fibrotic
TCGA-A1-A0SN	0.00979273	0	0.0775532	0.0807939	0	0.249976	0.0658191	0	0.014038	0	0	0.0176666	0.00555163	0.0957678	0.0984044	0.130466	0.0358864	0	0.118285	0	0	0	0	0.468314	0.885444	High-fibrotic
TCGA-AR-A1AN	0.0125683	0.0221897	0.0300741	0.0433367	0	0.222927	0	0	0.00362909	0.0157289	0	0	0.00803014	0.210012	0.0869106	0.124761	0.0977256	0	0.122107	0	0	0	0	0.459228	0.88884	High-fibrotic
TCGA-BH-A1FC	0.0250544	0.00515439	0.176475	0.167096	0	0.0899603	0.115949	0.0500687	0.000490219	0.00249711	0	0.0453231	0	0.0315542	0.0924104	0.11884	0.038084	0.014012	0.0223196	0	0	0.00471176	0	0.537472	0.848147	High-fibrotic
TCGA-A2-A0D1	0.0552798	0	0.153106	0.148591	0	0.114945	0.00924041	0.0675132	0.030912	0	0	0.0193271	0.00153759	0.166672	0.0832939	0.12803	0	0	0.0215518	0	0	0	0	0.274585	0.976163	High-fibrotic
TCGA-AR-A1AV	0	0.00137676	0.00620252	0.0139596	0	0.174804	0	0.0121595	0.00601276	0.0177474	0	0.0131883	0.0016694	0.204234	0.0680384	0.240966	0.0791502	0	0.136495	0	0.0239969	0	0	0.287241	0.969181	High-fibrotic
TCGA-A2-A0T1	0.000354521	0.0110625	0.0958527	0.142501	0	0.167151	0.0364586	0.0291216	0.0456287	0.00278524	0	0.0186023	0.0162068	0.0906514	0.0925957	0.160347	0.0356591	0.00877666	0.0462457	0	0	0	0	0.592619	0.823754	High-fibrotic
TCGA-A8-A090	0	0.0265082	0.0335757	0.0101601	0	0.121646	0.0151638	0	0.0172195	0.0395704	0	0.0185777	0.00935236	0.240941	0.0717067	0.195663	0.0347002	0.0152914	0.149924	0	0	0	0	0.481754	0.87732	High-fibrotic
TCGA-AO-A1KP	0	0	0.0852712	0.0618974	0	0.190491	0	0.0998865	0	0	0	0.0471932	0	0.0637834	0.0876681	0.148794	0.0288017	0.0684677	0.0972032	0	0	0.0205434	0.02	0.12302	1.03165	High-fibrotic
TCGA-A8-A08X	0.0159222	0.011436	0.237068	0.0289266	0	0.174339	0.0350222	0	0.00298755	0.0140896	0	0.0479624	0.0202086	0.0869664	0.0923552	0.1143	0.0181504	0	0.100266	0	0	0	0	0.562838	0.835221	High-fibrotic
TCGA-E9-A1NH	0	0.0364434	0.0333709	0.0420791	0	0.178372	0	0	0.0256762	0.0296721	0	0.0211406	0	0.163852	0.0998088	0.156138	0.123537	0	0.0858109	0	0	0.00409919	0	0.356005	0.93537	High-fibrotic
TCGA-A8-A09T	0.0210445	0	0.0106549	0.0464185	0	0.260694	0	0	0	0	0	0.0211161	0.0192857	0.00299503	0.0764792	0.490328	0.0141478	0	0	0.0180037	0	0.018833	0	0.305489	0.964953	High-fibrotic
TCGA-C8-A137	0.0440714	0	0.222253	0.0122451	0	0.106506	0.0156691	0.0540789	0.0139961	0.0193801	0	0.00101788	0	0.151147	0.0951036	0.141011	0.0104261	0.0113787	0.101716	0	0	0	0	0.277794	0.974506	High-fibrotic
TCGA-E2-A156	0	0.0115534	0.0182126	0.000678145	0	0.112902	0	0.053336	0.0259904	0	0	0.060871	0.0461887	0.0828473	0.0124661	0.288213	0.0568605	0.0518806	0.172364	0	0	0.00563674	0	0.21562	0.993542	High-fibrotic
TCGA-B6-A0IM	0	0.0166983	0.00587387	0.0786536	0	0.113252	0	0	0.0212157	0	0.0204156	0	0.00198261	0.300894	0.0984933	0.145768	0.0706897	0.0214732	0.0991842	0	0	0.00540609	0	0.336677	0.950121	High-fibrotic
TCGA-A8-A095	0.0275078	0.0121368	0.0392	0.161286	0	0.0823626	0	0.0459096	0	0.0340841	0	0.0397444	0.000744478	0.0616215	0.0572367	0.166909	0.0592639	0.0298509	0.182142	0	0	0	0	0.331116	0.945129	High-fibrotic
TCGA-BH-A18J	0	0.00680102	0.0112524	0.0614398	0	0.117865	0	0	0.00824036	0	0	0.021406	0	0.309009	0.0384446	0.274293	0	0	0.151249	0	0	0	0	0.338651	0.952711	High-fibrotic
TCGA-EW-A2FR	0	0.00676077	0.116145	0.0870041	0	0.204578	0	0.00968102	0.034413	0.0207416	0	0.0380698	0	0.116677	0.0818925	0.168638	0.0229494	0	0.0882542	0	0.00187553	0.0023192	0	0.411301	0.910709	High-fibrotic
TCGA-E9-A1RB	0	0.00934584	0.00901548	0.0984116	0	0.106853	0	0.00141529	0	0.048949	0	0.0287329	0	0.294116	0.0619618	0.183824	0.0465065	0.00728903	0.10206	0	0	0.0015192	0	0.376225	0.930152	High-fibrotic
TCGA-AN-A0AJ	0	0.0851156	0.0316198	0.0837968	0	0.146351	0.0478584	0.041887	0	0.0178997	0	0.0532349	0	0.080637	0.103403	0.145146	0.0735207	0.0124	0.0769655	0	0.000165155	0	0	0.558489	0.843405	High-fibrotic
TCGA-A8-A09Q	0.0610688	0.00221876	0.101382	0.0851826	0	0.133268	0.0418744	0.0214657	0.003966	0.0383071	0	0.0162139	0.00456254	0.128884	0.064713	0.159139	0.0306077	0	0.101217	0	0	0.00592862	0	0.520472	0.862766	High-fibrotic
TCGA-E9-A1RC	0	0.0182853	0.0358694	0.00622841	0	0.0401596	0	0.0420086	0.00483743	0	0	0.0080644	0	0.335545	0.00362382	0.21727	0.155954	0.0998742	0	0.00840756	0.00607174	0.0178013	0	0.267778	0.998387	High-fibrotic
TCGA-A7-A26E	0.0219289	0	0.0773213	0.0293606	0	0.263035	0	0	0	0	0	0.0132381	0.126347	0	0.0681395	0.193811	0.0246194	0.00910934	0.150907	0	0.0184303	0.00375397	0	0.27268	0.967482	High-fibrotic
TCGA-A8-A0A1	0	0	0.00355508	0.107229	0	0.152233	0.0432394	0.0483828	0.0354307	0.0185895	0	0.0233242	0.0272185	0.149124	0.083173	0.125914	0.0601187	0.0159737	0.093229	0	0	0.0132654	0	0.532499	0.853719	High-fibrotic
TCGA-D8-A1J9	0	0	0.0697373	0.0342316	0	0.229104	0.000130593	0.0117953	0.011191	0	0	0.0307743	0.00927995	0.101047	0.0747447	0.237205	0.0418068	0.00912987	0.131775	0	0	0.00804641	0	0.348198	0.938083	High-fibrotic
TCGA-BH-A1EO	0.00461973	0.00608123	0	0.0958152	0	0.241285	0.0172597	0	0.0154579	0	0	0.0112297	0.0190041	0.0888835	0.0844094	0.169992	0.0704096	0	0.175553	0	0	0	0	0.416587	0.908495	High-fibrotic
TCGA-A8-A08J	0	0.0142878	0.139387	0.0584527	0	0.170064	1.27955e-05	0	0.0274693	0.00134873	0	0.0308228	0	0.125554	0.087323	0.24431	0.0106511	0	0.0843485	0	0	0.005968	0	0.452334	0.891891	High-fibrotic
TCGA-A8-A09V	0.0790605	0	0.166097	0.0208228	0	0.0956838	0	0.028571	0	0	0.00538693	0	0.0907996	0	0.0501675	0.231699	0	0.0174031	0.187235	0	0	0.027074	0	0.266711	0.974406	High-fibrotic
TCGA-AN-A04A	0.00646046	0	0.119388	0.0312058	0	0.296296	0	0	0.0194481	0	0	0	0.000255112	0.175316	0.104665	0.137719	0.0315027	0	0.0777443	0	0	0	0	0.371812	0.92924	High-fibrotic
TCGA-D8-A1Y1	0.00456045	0	0	0.0332486	0	0.249809	0.0160446	0	0	0.0258735	0	0.0127687	0.0248494	0.130062	0.0255076	0.338061	0.00181073	0.0169775	0.087023	0	0	0.0334037	0	0.35411	0.938369	High-fibrotic
TCGA-E9-A229	0.0311274	0	0.0633278	0.0437629	0	0.254835	0	0.0193213	0.0169111	0.00778423	0	0.0230518	0.0516283	0.0541267	0.0740204	0.174026	0.0206611	0.0362703	0.124032	0	0	0.00511444	0	0.415774	0.909073	High-fibrotic
TCGA-A8-A08T	0.0121339	0.0382887	0.0444255	0.0488814	0	0.201957	0.00741923	0	0.0166202	0	0	0.00405291	0.0250529	0.165587	0.0549146	0.189115	0.00078613	0	0.190766	0	0	0	0	0.347266	0.93917	High-fibrotic
TCGA-E9-A1RF	0.0134131	0	0.0896313	0.124039	0	0.192082	0.0448373	0.022935	0.00497116	0.0349392	0	0.030883	0.00276119	0.0863633	0.068165	0.181137	0.0335313	0.0364182	0.0259067	0	0	0.0079865	0	0.501409	0.868535	High-fibrotic
TCGA-C8-A3M8	0.0279395	0	0.0432248	0.16174	0	0.118789	0	0.0232118	0.0206479	0.000772877	0	0	0	0.166988	0.104166	0.230681	0.0339556	0	0.0678843	0	0	0	0	0.265855	0.977598	High-fibrotic
TCGA-A8-A094	0.0140092	0.00839436	0.102794	0.102909	0	0.146813	0.0719925	0.021836	0	0.0196257	0	0.031467	0	0.120534	0.0843855	0.17513	0.0218586	0.0442945	0.0240412	0	0	0.00991489	0	0.543441	0.848817	High-fibrotic
TCGA-A8-A092	0	0.00817455	0.0541137	0.0465917	0	0.131112	0.00828357	0.0591738	0.0306008	0	0	0.0255012	0	0.18936	0.0784822	0.228881	0.00203675	0	0.118322	0	0	0.0193662	0	0.335232	0.945256	High-fibrotic
TCGA-D8-A1JD	0	0.00449571	0.111241	0.0529149	0	0.236676	0.0056594	0.00548691	0.0232198	0	0	0.0127234	0.0231511	0.0103503	0.07245	0.201248	0.0939133	0.00237803	0.122664	0	0	0.0214282	0	0.4275	0.904477	High-fibrotic
TCGA-D8-A1JC	0.00730899	0.00187556	0.0833391	0.0562334	0	0.16146	0	0.00706524	0.0138563	0.0141994	0	0.0301629	0.0122463	0.1867	0.11827	0.104884	0	0.0317056	0.167501	0	0.00319214	0	0	0.425248	0.904289	High-fibrotic
TCGA-AN-A0XN	0	0	0.00536988	0	0	0.399809	0.00992892	0	0.000303229	0.0244019	0	0	0.00267058	0.246776	0.0532501	0.174377	0.0440553	0.0075803	0.0293089	0	0	0.00216814	0	0.41007	0.913788	High-fibrotic
TCGA-AN-A0XW	0.0100768	0.0144285	0.0681135	0.0959619	0	0.122378	0.0652592	0.0735211	0	0	0	0.0716431	0.0145109	0.0281968	0.107838	0.155681	0.0239194	0.0177181	0.130753	0	0	0	0	0.540942	0.850709	High-fibrotic
TCGA-C8-A1HF	0.0367121	0	0.118695	0.141184	0	0.154349	0.0928549	0.0224276	0.0105697	0.0432938	0	0.0185565	0	0.0596709	0.0690751	0.16831	0.0148967	0.0162622	0.0283591	0	0	0.00478287	0	0.535155	0.852018	High-fibrotic
TCGA-A2-A1FW	0.0050808	0.0453959	0.139308	0.136576	0	0.154542	0	0	0	0.0801392	0	0	0.00747784	0.013441	0.119352	0.197754	0.00420413	0	0.0967283	0	0	0	0	0.328443	0.949402	High-fibrotic
TCGA-E9-A1R5	0.0260319	0	0.0775073	0.00820065	0	0.265149	0	0	0.0242019	0.0168044	0	0.0176127	0	0.127217	0.0972339	0.167876	0.0537143	0	0.115431	0	0	0.00302077	0	0.285578	0.964653	High-fibrotic
TCGA-E2-A155	0.0207674	0.00112558	0.200229	0.107184	0	0.190009	0	0	0	0	0	0	0	0.0291151	0.105202	0.186857	0.0151587	0	0.132617	0	0.00341135	0.00832442	0	0.291922	0.965662	High-fibrotic
TCGA-BH-A204	0.0321238	0	0.00902129	0.0748431	0	0.177451	0	0.00656401	0	0	0	0	0.113165	0	0.0620543	0.369873	0	0	0.0858198	0	0.0509969	0.0180883	0	0.161415	1.01808	High-fibrotic
TCGA-D8-A1Y2	0	0.069278	0.0669294	0.0867975	0	0.209789	0.0285138	0	0	0.06777	0	0	0.0197351	0.111845	0.063487	0.166552	0.0413451	0	0.0488703	0	0	0.0190888	0	0.588095	0.829541	High-fibrotic
TCGA-A7-A0CH	0	0.011545	0.0116634	0.102788	0	0.222365	0.010355	0	0	0	0	0.0170055	0.0346141	0.149396	0.0617939	0.147307	0.0601512	0.0227148	0.1483	0	0	0	0	0.237541	0.985368	High-fibrotic
TCGA-AR-A0TZ	0.0391991	0	0.0134401	0.0778373	0	0.246282	0	0.0658006	0	0	0	0.00866763	0.0872442	0.0148349	0.0670238	0.210378	0.0605528	0.0211657	0.0716354	0.0159385	0	0	0	0.206478	0.99696	High-fibrotic
TCGA-BH-A0H7	0.037363	0.00299037	0.034363	0.0298052	0	0.204717	0	0	0.0549099	0.0197411	0	0.0170752	0	0.216443	0.106645	0.077282	0.0506951	0	0.14797	0	0	0	0	0.374548	0.927626	High-fibrotic
TCGA-A8-A08O	0.118777	0	0.131846	0.0656303	0	0.205395	0	0.0337196	0.0158213	0	0	0.0432568	0.0329305	0.0253915	0.0618994	0.13541	0.0234555	0	0.106467	0	0	0	0	0.263313	0.97646	High-fibrotic
TCGA-AO-A0J5	0.0355688	0	0.191175	0.0165006	0	0.189984	0	0.0165826	0	0	0.011767	0.00816782	0.0278833	0.0558473	0.0605472	0.201515	0.0218942	0	0.154786	0	0	0.00778178	0	0.36087	0.933279	High-fibrotic
TCGA-D8-A1XS	0.00206364	0	0.081456	0.0532989	0	0.208865	0.0309363	0.0483544	0.00347549	0.0307707	0	0.00962833	0.0203422	0.0424901	0.093324	0.201499	0.0268178	0.00382127	0.142856	0	0	0	0	0.372502	0.927539	High-fibrotic
TCGA-B6-A0I8	0.0593055	0	0.190856	0.0415058	0	0.0452075	0	0.00756735	0.00908229	0.00590846	0	0.0071996	0.0299476	0.0705935	0.0557885	0.288076	0	0.0472745	0.124539	0	0	0.0171481	0	0.252495	0.983887	High-fibrotic
TCGA-D8-A27G	0.00732876	0.056584	0.018986	0.150618	0	0.113643	0.0361442	0.0548941	0	0.0103	0	0.0330702	0.00677115	0.0738247	0.0942168	0.16964	0.0308783	0	0.143102	0	0	0	0	0.470516	0.884104	High-fibrotic
TCGA-BH-A1EX	6.28005e-05	0.0148725	0.0610093	0.0334664	0	0.198834	0.0244481	0.071136	0	0.0497408	0	0.00255214	0.00912071	0.0814747	0.0633194	0.204417	0.0639666	0.0560856	0.0308167	0	0.0128649	0.0218126	0	0.398758	0.916264	High-fibrotic
TCGA-A8-A076	0.0313163	0	0.128594	0.0487288	0	0.130898	0.0275912	0	0.0292524	0.0127171	0	0.00394512	0	0.149994	0.0593982	0.186951	0.0418596	0.0186829	0.107416	0	0	0.0226569	0	0.422066	0.906329	High-fibrotic
TCGA-B6-A0WT	0	0.0100682	0.13317	0.0164874	0	0.205818	0	0.0332517	0.0480922	0	0	0.0474058	0	0.0716597	0.0588865	0.169278	0.00377486	0.0290501	0.173058	0	0	0	0	0.342488	0.940518	High-fibrotic
TCGA-BH-A0BZ	0.0201969	0	0.0970631	0.179763	0	0.117173	0.0521588	0.0207837	0.049018	0	0	0.0287799	0.0119661	0.102673	0.102995	0.142029	0.0232972	0.00363283	0.0484699	0	0	0	0	0.565904	0.835929	High-fibrotic
TCGA-A2-A0YT	0	0	0.138708	0.0104726	0	0.195342	0	0	0.0100715	0.0225324	0	0.061924	0.0559538	0.0458956	0.0361932	0.199109	0.0154484	0.0808928	0.113517	0	0.0139401	0	0	0.339747	0.940826	High-fibrotic
TCGA-AR-A1AR	0.0359955	0.0412576	0	0.0231633	0	0.231387	0.0825546	0	0	0.0416572	0	0	0.072539	0.0958075	0.0814996	0.163828	0.0497462	0.0639231	0.0147942	0	0.00184695	0	0	0.590337	0.82808	High-fibrotic
TCGA-D8-A1XY	0.0370471	0	0.0488558	0.0131257	0	0.119552	0.0231384	0.0536833	0.013891	0	0	0.0218584	0.0318572	0.138214	0.0499015	0.234618	0.0525299	0.0172716	0.143281	0	0	0.00117546	0	0.32763	0.946515	High-fibrotic
TCGA-E9-A1R6	0	7.069e-05	0.0291643	0.0551575	0	0.169771	0	0.0224145	0.035511	0	0	0.0367661	0	0.113894	0.0810576	0.307638	0.0284206	0	0.113721	0	0	0.00641431	0	0.280067	0.969748	High-fibrotic
TCGA-E9-A1RE	0.0884309	0	0.100478	0.092471	0	0.189413	0	0.0390075	0.0309874	0	0	0.00974142	0	0.103849	0.057465	0.0974504	0.0239527	0	0.166754	0	0	0	0	0.318811	0.951418	High-fibrotic
TCGA-B6-A0IK	0.0451503	0	0.158212	0.169979	0	0.122672	0	0.0278866	0	0.0342905	0	0.00587861	0.0147783	0.0761926	0.0967272	0.133723	0.0237264	0.0104822	0.080302	0	0	0	0	0.480882	0.877564	High-fibrotic
TCGA-A8-A0AB	0.0217235	0	0.148956	0.0329691	0	0.104667	0.00155902	0	0	0.0169486	0	0	0	0.118885	0	0.251243	0.0786182	0.00251556	0.210199	0	0	0.0117164	0	0.242844	0.986314	High-fibrotic
TCGA-EW-A1J3	0.00615751	0	0.0196797	0.0587164	0	0.197449	0.0283155	0.0801165	0	0.0473059	0	0	0.0100375	0.0227606	0.101134	0.219726	0.0483067	0.0404667	0.0643004	0.0218682	0.024889	0.00877046	0	0.310452	0.955211	High-fibrotic
TCGA-GI-A2C8	0	0.00123958	0.0414622	0.0690757	0	0.132929	0	0.0434899	0.0271339	0.0305336	0.00341138	0	0.0879687	0.0768016	0.0723514	0.253223	0.0114189	0.00753477	0.131536	0	0	0.00989125	0	0.419671	0.907293	High-fibrotic
TCGA-A8-A0A7	0.0951035	0	0.109274	0.164925	0	0.114531	0.0531271	0.0189541	0.023291	0.00861998	0	0.0432248	0.0142439	0.0518717	0.0740052	0.112443	0.0390068	0.0162489	0.06113	0	0	0	0	0.650379	0.793405	High-fibrotic
TCGA-BH-A0H6	0.0491912	0	0.0729105	0.0522913	0	0.16551	0	0.0177758	0.0111544	0	0	0.0407262	0.110596	0.0388686	0.055365	0.219731	0.0553587	0.00285486	0.106396	0	0	0.00127028	0	0.22962	0.983642	High-fibrotic
TCGA-AO-A1KS	0.0162938	0	0.00754204	0.0950566	0	0.295861	0.0159313	0.0188882	0	0	0	0	0.0162544	0.025079	0.0599887	0.198172	0	0.0822205	0.168713	0	0	0	0	0.325867	0.949605	High-fibrotic
TCGA-BH-A0EB	0.000789894	0.0350974	0.0885244	0.145876	0	0.153553	0.0183691	0.0130808	0.00666005	0	0	0.0172916	0.00049254	0.0479149	0.114928	0.257984	0.0399535	0	0.0288762	0	0.012271	0.0183372	0	0.475097	0.880769	High-fibrotic
TCGA-AR-A24L	0.0533384	0	0.0642558	0.00868646	0	0.160017	0.00680451	0	0	0.0531872	0	0.00102198	0	0.226734	0.066785	0.140037	0	0	0.215384	0	0	0.00374837	0	0.324626	0.950413	High-fibrotic
TCGA-D8-A1JJ	0	0.0127101	0.00125668	0.138715	0	0.129317	0	0	0.0315057	0	0	0.0595337	0	0.234607	0.0584139	0.203619	0.0668606	0.00552062	0.0428144	0	0	0.0151253	0	0.377624	0.928691	High-fibrotic
TCGA-C8-A12Z	0.0723017	0	0.128138	0.0628377	0	0.106768	0	0.0280075	0.00433865	0	0	0.0183235	0	0.242071	0.125299	0.103812	0.0166434	0	0.0913338	0	0	0.000126485	0	0.289975	0.969181	High-fibrotic
TCGA-B6-A0WW	0.0384172	0	0.11055	0.0233892	0	0.198469	0.0252864	0.0906063	0.0197395	0	0	0.00309292	0.0415752	0.060395	0.149784	0.15472	0.000257013	0.00246978	0.0812479	0	0	0	0	0.320257	0.95251	High-fibrotic
TCGA-A2-A0SV	0	0.0227367	0.0133325	0.0254184	0	0.254374	0	0	0.0676162	0.00432355	0	0.0116885	0.00460616	0.139412	0.0711551	0.193539	0.105322	0.0114939	0.0715758	0	0	0.00340629	0	0.406631	0.913033	High-fibrotic
TCGA-AR-A24U	0.0326802	0.0366524	0.0848348	0.0446938	0	0.176362	0.0843543	0.0282676	0	0.0542612	0	0	0.00746244	0.0891557	0.0709653	0.125116	0.0519296	0.029136	0.0643731	0	0	0.0197555	0	0.577517	0.838999	High-fibrotic
TCGA-A8-A09N	0.0162611	0	0.0883777	0.0961704	0	0.11602	0.0123662	0	0.0138333	0.017094	0	0.0711713	0	0.0600397	0.103695	0.125021	0.0332242	0	0.246727	0	0	0	0	0.342617	0.941874	High-fibrotic
TCGA-D8-A1Y0	0.0716862	0	0.053494	0.127314	0	0.197534	0.014031	0.054705	0.00392229	0.0191558	0	0.0154179	0.0471009	0	0.0852534	0.0970092	0.117237	0.00360315	0.0925357	0	0	0	0	0.463413	0.887353	High-fibrotic
TCGA-A8-A07P	0.0610491	0	0.0420625	0.049417	0	0.152476	0.0427949	0.0138603	0.000424092	0	0	0.0219119	0.0763331	0.0273199	0.0596737	0.162694	0.0489825	0.0270145	0.213275	0	0	0.00071168	0	0.42723	0.905153	High-fibrotic
TCGA-D8-A27W	0.0408271	0	0.185786	0.129683	0	0.116804	0.0130322	0.0102225	0.0224876	0	0	0.018405	0.0400797	0.0939218	0.0607476	0.143805	0.0447641	0	0.0794335	0	0	0	0	0.509534	0.865271	High-fibrotic
TCGA-BH-A202	0.0610644	0	0.0515624	0.101891	0	0.163618	0.0963749	0.00851226	0.00381539	0.00679665	0	0.0229059	0	0.113197	0.0760637	0.185359	0.0271903	0.00451662	0.0710647	0	0	0.00606863	0	0.419237	0.907523	High-fibrotic
TCGA-AN-A046	0.00694386	0.0194248	0	0.113495	0	0.231104	0.0393179	0.0728651	0	0.0240841	0	0.061037	0.00803362	0.0401861	0.127167	0.15557	0.0649883	0.017998	0.0167878	0	0.000997582	0	0	0.527558	0.850823	High-fibrotic
TCGA-BH-A18U	0.022247	0	0.139784	0.0606754	0	0.165879	0.039277	0.0336589	0.00459433	0.00117623	0	0.016089	0	0.0862454	0.098722	0.169166	0.0456451	0.0018193	0.080724	0	0	0.0342974	0	0.443444	0.896669	High-fibrotic
TCGA-AN-A0AS	0.00218476	0	0.011902	0.018634	0	0.114535	0.0147176	0	0.056358	0	0	0.0477885	0	0.322744	0.0275289	0.145639	0.00578606	0.0271238	0.197168	0	0	0.00789055	0	0.402443	0.917496	High-fibrotic
TCGA-BH-A1F2	0	0	0	0.0190377	0	0.166575	0	0.0526002	0	0.0259029	0	0	0.0132596	0.173171	0.0540013	0.269697	0.0101026	0.0276272	0.108186	0.0266582	0.0295767	0.0236039	0	0.361091	0.934915	High-fibrotic
TCGA-C8-A12L	0.0540888	0	0.150889	0.13028	0	0.086252	0	0.0891075	0	0.00457942	0	0.0315957	0.00828472	0.0873641	0.0821563	0.146263	0.0581303	0.0259662	0.0431625	0	0	0.00188101	0	0.384408	0.922946	High-fibrotic
TCGA-E9-A1R7	0.0353403	0	0.2282	0.0625721	0	0.269136	0	0	0	0	0	0.0529579	0.0181471	0.108007	0.0541262	0.0708286	0.006692	0	0.0939935	0	0	0	0	0.213093	1.00489	High-fibrotic
TCGA-AR-A24V	0	0	0.0756643	0.013752	0	0.259003	0	0.00577613	0.00569093	0.012443	0	0	0.00300157	0.0598295	0.0773666	0.28805	0	0.00952881	0.140323	0	0	0.0495707	0	0.409355	0.911675	High-fibrotic
TCGA-A2-A25C	0.0906628	0	0.0840242	0.00506394	0	0.280959	0	0.0162106	0	0.0306069	0	0.00740091	0.0112207	0.0502104	0.0681291	0.119937	0.0630852	0.0936138	0.078733	0	0	0.000142329	0	0.378268	0.925165	High-fibrotic
TCGA-A8-A06U	0.0287728	0	0.0991261	0.109519	0	0.143755	0.0252882	0.0385991	0.0200216	0.00321485	0	0.0412361	0.0064605	0.0914294	0.0856754	0.191973	0.0209419	0.0178958	0.070067	0	0	0.00602542	0	0.440611	0.897575	High-fibrotic
TCGA-A8-A08S	0	0.00734787	0.0603154	0.0147957	0	0.101419	0	0.0571743	0.0496304	0.0267248	0	0.0583953	0.00549787	0.149401	0.0599399	0.194104	0.0860301	0.0378575	0.0643553	0	0	0.0270113	0	0.3077	0.95553	High-fibrotic
TCGA-E9-A1NF	0	0	0.0497867	0.0887887	0	0.216725	0.0109858	0	0.0420914	0	0	0.0119486	0.00809388	0.149614	0.0570058	0.211516	0.064898	0.0138106	0.0701879	0	0	0.00454781	0	0.437601	0.898905	High-fibrotic
TCGA-A2-A04R	0.046676	0	0.11246	0.0394711	0	0.12113	0	0.018665	0.0056144	0	0	0.00928596	0	0.222736	0.0887866	0.127731	0	0	0.20634	0	0	0.00110333	0	0.302395	0.961118	High-fibrotic
TCGA-BH-A0HY	0.0612472	0	0.0983473	0.0302519	0	0.208825	0	0.0377178	0	0.0130281	0	0.00347559	0	0.109729	0.124195	0.165894	0.0328153	0	0.114473	0	0	0	0	0.243649	0.983691	High-fibrotic
TCGA-D8-A1XD	0.0706356	0	0.181657	0.0294429	0	0.167379	0	0	0.0105049	0	0.00146849	0.0119214	5.98882e-05	0.106621	0.0477312	0.208701	0.0245151	0.0017093	0.137654	0	0	0	0	0.27599	0.971549	High-fibrotic
TCGA-A8-A097	0.0262862	0.0551617	0	0.0570916	0	0.13892	0	0	0.0359964	0.0564504	0	0.0329896	0.000843509	0.202121	0.0840363	0.188102	0.00227357	0	0.119729	0	0	0	0	0.416795	0.908276	High-fibrotic
TCGA-A2-A0CX	0.0537016	0	0.0545713	0.0975575	0	0.222983	0.0288124	0.0467082	0.00657965	0	0	0.0160611	0.0115746	0.0615932	0.0878796	0.174407	0.0259881	0.0187298	0.0742365	0	0	0.0186167	0	0.43701	0.899164	High-fibrotic
TCGA-C8-A8HQ	0.00749974	0.0495284	0.096991	0.152495	0	0.0333863	0.0423423	0.0728502	0	0	0	0.063061	0.0151554	0.121352	0.106716	0.121326	0.0227537	0.00373579	0.0908069	0	0	0	0	0.498335	0.870406	High-fibrotic
TCGA-D8-A1XZ	0	0.0442264	0.16148	0.104738	0	0.177605	0.00502273	0.000909841	0.0181907	0.00488907	0	0.0346311	0.00392171	0.105254	0.0759689	0.135862	0	0.0226062	0.0965112	0	0	0.00818303	0	0.444543	0.895392	High-fibrotic
TCGA-AR-A24H	0.036175	0.00350763	0	0.0656093	0	0.141516	0.0951653	0.039873	0.0111169	0.0513887	0	0.0246689	0.0120605	0.106173	0.139627	0.223973	0.0220938	0	0.0270521	0	0	0	0	0.432573	0.900772	High-fibrotic
TCGA-A8-A06T	0.033644	0	0.125027	0.0934338	0	0.163565	0.0478387	0.0921948	0	0.0103263	0	0.0419306	0.00944571	0.0437817	0.0927224	0.114191	0.0564802	0.0257882	0.0496301	0	0	0	0	0.452019	0.891846	High-fibrotic
TCGA-C8-A1HL	0.0463638	0	0.0596562	0.0222659	0	0.195393	0.0299956	0.00493172	0	0.0461222	0	0.00114745	0	0.160224	0.0470049	0.280597	0.0179434	0.000587222	0.0781461	0	0	0.00962196	0	0.365295	0.931579	High-fibrotic
TCGA-AO-A1KT	0.024606	0	0.0737403	0.0229718	0	0.234848	0.0212136	0.0328785	0.0035438	0.00108109	0.0168782	0	0.0614782	0.0651879	0.0385111	0.217397	0	0.0704392	0.0514776	0.0205398	0.00779484	0.0354134	0	0.339305	0.941068	High-fibrotic
TCGA-C8-A26Z	0.132209	0	0.159827	0.0755665	0	0.103122	0	0.0313257	0	0	0	0	0	0.0021317	0.0785499	0.239024	0.0531703	0	0.0963623	0.0137008	0.00227358	0.0127379	0	0.259904	0.979761	High-fibrotic
TCGA-A7-A13F	0.0101042	0	0.0613835	0.0150287	0	0.133861	0	0.00822771	0.00396967	0.0040879	0	0	0	0.0661819	0.0442204	0.228546	0.230395	0	0.156723	0	0.0138721	0.0233996	0	0.320966	0.950287	High-fibrotic
TCGA-A8-A09G	0.0792319	0	0.091182	0.173427	0	0.175726	0.0374559	0.0162734	0	0	0	0.037785	0.0231303	0	0.124186	0.176403	0.00439885	0	0.0608006	0	0	0	0	0.483193	0.875689	High-fibrotic
TCGA-C8-A12O	0	0.0179215	0.120156	0.0933323	0	0.138471	0.00616405	0.00379833	0.0244187	0.0330937	0	0.029139	0	0.187362	0.0748527	0.125439	0.00611115	0.0166464	0.123094	0	0	0	0	0.461234	0.887915	High-fibrotic
TCGA-A2-A04W	0.0767422	0	0.169723	0.0946635	0	0.10203	0.0096019	0.0480399	0.0159472	0	0	0.0165584	0	0.143947	0.058644	0.141735	0	0.0189001	0.0761559	0	0	0.0273115	0	0.356393	0.935988	High-fibrotic
TCGA-A8-A07F	0.0403866	0	0.0630343	0.0599089	0	0.245091	0	0	0.0251868	0.0110079	0	0.0731462	0.000152951	0.055383	0.0756685	0.163551	0.0400216	0.00336155	0.141145	0	0	0.00295487	0	0.320065	0.950395	High-fibrotic
TCGA-A2-A0CU	0.0696306	0	0.085634	0.100589	0	0.161834	0	0.0321543	0	0.0357541	0	0.0339674	0.0165841	0.0135809	0.10166	0.197136	0.0295335	0	0.121942	0	0	0	0	0.263265	0.974422	High-fibrotic
TCGA-BH-A0AW	0.0553501	0	0.0892872	0.114752	0	0.127109	0.0627909	0.0262915	0.0282222	0.0259351	0	0.0304122	0.018845	0.0900804	0.0752541	0.125508	0.0319902	0.0107224	0.08745	0	0	0	0	0.628571	0.811496	High-fibrotic
TCGA-AO-A0JA	0	0	0.121006	0.0338382	0	0.271933	0	0	0.0132548	0	0	0.0265573	0.00131062	0.0745491	0.109797	0.17318	0.00927343	0	0.143434	0	0.013641	0.00822653	0	0.406262	0.912988	High-fibrotic
TCGA-D8-A1XB	0.0016675	0.00423254	0.113601	0.0782063	0	0.165413	0	0	0.0322366	0	0	0.0618993	0.0214301	0.100842	0.0416079	0.0877756	0.0320407	0	0.259047	0	0	0	0	0.314517	0.95354	High-fibrotic
TCGA-A7-A6VX	0	0.00868841	0.056079	0.0466071	0	0.234103	0	0.0776226	0.0140742	0	0	0.0404904	0	0.0562431	0.0711328	0.2205	0.0963767	0.00297728	0.0608446	0	0	0.0142609	0	0.27734	0.968423	High-fibrotic
TCGA-E2-A1L9	0.00659707	0	0.018873	0.0960233	0	0.161475	0.0186432	0.01854	0.037332	0	0	0.00776475	0.0027283	0.213825	0.0960966	0.223653	0.00798614	0.0222839	0.0673555	0	0	0.000823271	0	0.426684	0.903937	High-fibrotic
TCGA-BH-A1EV	0.0700099	0	0.115177	0.0444489	0	0.0509158	0	0.0152661	0.0136842	0	0	0.0148986	0.0821117	0.0957186	0.0741101	0.330804	0	0.0650533	0.0218612	0	0	0.00594006	0	0.288806	0.968678	High-fibrotic
TCGA-BH-A0AU	0.0119842	0	0.14516	0.105736	0	0.184734	0.00964064	0.019577	0.0224402	0	0	0.0269819	0.0224318	0.0756936	0.0986255	0.12057	0.0358577	0.00562118	0.114946	0	0	0	0	0.474725	0.88191	High-fibrotic
TCGA-BH-A0B1	0.0503017	0	0.0804572	0.0599939	0	0.214608	0	0	0.0119057	0.0364548	0	0.0378131	0	0.0601638	0.0866623	0.133948	0.0410711	0.0181404	0.16848	0	0	0	0	0.314978	0.952022	High-fibrotic
TCGA-AR-A0TW	0.0175159	0.0126209	0.145498	0.186968	0	0.0279725	0.0375223	0.0541064	0	0	0	0.0598516	0.0140185	0.032271	0.109681	0.195797	0.00380655	0.00760635	0.0822068	0	0.0125567	0	0	0.522875	0.857222	High-fibrotic
TCGA-BH-A0BD	0.0231975	0.006621	0.0596793	0.0770173	0	0.158241	0.0199885	0.0426961	0.00994627	0.0634705	0	0.0204828	0.0115194	0.0497065	0.0839214	0.11983	0.0654506	0.0429095	0.145321	0	0	0	0	0.473791	0.883553	High-fibrotic
TCGA-D8-A1JA	0	0	0.0230284	0.0503649	0	0.234614	0.0257646	0.00841903	0	0	0.0325727	0	0.0236287	0	0.0994786	0.213641	0.0656852	0.137607	0	0.0205136	0.0393586	0.0253232	0	0.294477	0.965106	High-fibrotic
TCGA-A2-A0EU	0.0270659	0	0.0201211	0.0221828	0	0.246083	0.00627791	0.0356381	0	0.0622453	0	0.00899191	0	0.0715275	0.0814911	0.0974908	0.0945305	0.0350906	0.186674	0	0	0.00458938	0	0.32588	0.947533	High-fibrotic
TCGA-AO-A12D	0	0.0284443	0.152614	0.122302	0	0.139098	0.0659759	0.0403888	0.0249359	0	0	0.00811993	0.00571165	0.0507554	0.0869482	0.156233	0	0.0400212	0.0734261	0	0	0.00502522	0	0.550283	0.845501	High-fibrotic
TCGA-BH-A0E7	0.000218729	0	0.0697474	0	0	0.134352	0	0.0278444	0.00373934	0	0	0.0247808	0.111658	0.01816	0.0559938	0.298403	0	0	0.255103	0	0	0	0	0.192763	1.00522	High-fibrotic
TCGA-C8-A278	0.0591051	0	0.148626	0.0579529	0	0.154994	0.0736081	0.0252215	0.00352224	0.0311963	0	0	0	0.0931623	0.0678024	0.134054	0.0427968	0.026297	0.0810953	0	0	0.000566479	0	0.588064	0.830787	High-fibrotic
TCGA-E2-A15A	0.00187685	0	0.132569	0.128414	0	0.13524	0.0590078	0.0374697	0	0.00557109	0	0.0259354	0	0.0662095	0.0874715	0.167014	0.021953	0.0201111	0.0982588	0	0	0.0128991	0	0.469462	0.884968	High-fibrotic
TCGA-D8-A1JT	0	0.0240086	0.0124262	0.00328088	0	0.0923045	0	0.0242052	0.00720491	0.0276641	0	0.032447	0.0166946	0.210119	0.0895686	0.246776	0	0.0853837	0.113611	0	0.0143049	0	0	0.327664	0.952446	High-fibrotic
TCGA-AQ-A0Y5	0.00679137	0	0.00407062	0	0	0.172131	0.0100835	0.0147443	0	0	0	0.0188257	0	0.154777	0.0792305	0.339832	0	0.0367171	0.111403	0	0	0.0513935	0	0.387975	0.92325	High-fibrotic
TCGA-A8-A07W	0	0.00184888	0.0389806	0.0558906	0	0.147445	0	0	0.0255235	0.00757758	0	0.0410396	0.0211451	0.194274	0.0702908	0.214967	0.0381494	0	0.142869	0	0	0	0	0.383989	0.923489	High-fibrotic
TCGA-A1-A0SM	0	0.0408372	0.0316295	0.047336	0	0.222872	0	0.0160405	0	0	0	0.0322055	0.1196	0.0137459	0.0352642	0.25574	0.0102777	0.0578228	0.093972	0	0	0.0226572	0	0.274058	0.967538	High-fibrotic
TCGA-AC-A3EH	0	0.00372573	0.0354301	0.179006	0	0.0298852	0	0.0249861	0.0474282	0.0150859	0	0.0254206	0	0.11933	0.0851534	0.233833	0.034219	0	0.146625	0	0	0.0198727	0	0.324112	0.949393	High-fibrotic
TCGA-E2-A14W	0.0219539	0	0	0	0	0.12221	0	0	0.0770029	0	0	0.00663517	0	0.29723	0.0873602	0.345976	0.00409603	0	0.0346102	0	0.00292544	0	0	0.216328	1.02241	High-fibrotic
TCGA-BH-A1F8	0.0712321	0	0.105667	0.0822986	0	0.194325	0.0357981	0.0371008	0	0.0666703	0	0	0	0.0409374	0.0483081	0.164199	0.0387467	0.0465654	0.0657426	0	0	0.00240914	0	0.296538	0.959936	High-fibrotic
TCGA-BH-A1ES	0.0644635	0	0.0317485	0.00831398	0	0.279132	0	0.0126335	0	0	0	0.00584004	0.0129594	0.0785011	0.019742	0.233573	0.035719	0.0795863	0.0840428	0	0	0.0537451	0	0.172356	1.00901	High-fibrotic
TCGA-A8-A09W	0.0496673	0	0.0703459	0.0962969	0	0.23318	0	0.0257306	0.0160524	0	0	0	0.0700224	0	0.0827828	0.202309	0.00928649	0.00604916	0.130788	0	0	0.0074897	0	0.342932	0.940224	High-fibrotic
TCGA-BH-A203	0.0412049	0	0.114454	0.112815	0	0.138377	0.0503231	0.0670745	0.00489307	0.00865872	0	0	0.0394654	0.114419	0.0925322	0.141615	0.0320149	0.0104496	0.0317038	0	0	0	0	0.521755	0.859769	High-fibrotic
TCGA-AO-A12C	0.150226	0	0.174699	0.0113318	0	0.122639	0	0	0.0201894	0.0035551	0	0.0104105	0	0.143484	0.054405	0.170142	0.0122664	0	0.126653	0	0	0	0	0.404858	0.914947	High-fibrotic
TCGA-E2-A1IG	0	0	0.0927308	0.0440632	0	0.228165	0	0.0103403	0.0104219	0	0	0.0527497	0.0119534	0.102136	0.0895523	0.188908	0.101173	0	0.0206023	0	0.0406807	0.00652235	0	0.271917	0.970961	High-fibrotic
TCGA-BH-A0GZ	0.0515294	0	0.131816	0.0354862	0	0.133824	0	0.0326819	0.0411861	0.0130874	0	0.0459066	0.0448426	0.063508	0.0638992	0.122096	0.0796501	0	0.126397	0	0.0140889	0	0	0.321765	0.947945	High-fibrotic
TCGA-B6-A0IO	0.0159604	0	0.0331302	0.198084	0	0.111509	0.0101179	0.0319063	0.00584176	0.0577679	0	0	0.0151934	0.144277	0.179647	0.0756421	0.0246203	0	0.0904635	0	0	0.00583986	0	0.317274	0.959983	High-fibrotic
TCGA-BH-A0HI	0.00199	0.0155068	0.0720828	0.0794081	0	0.177709	0	0	0.021103	0.0183856	0	0.0199611	0	0.253499	0.136015	0.123648	0.0488644	0	0	0.0270995	0.00472792	0	0	0.330017	0.953061	High-fibrotic
TCGA-B6-A0RP	0.00464343	0.0752137	0.0422117	0.0872999	0	0.209222	0	0	0.020228	0.0254102	0	0.0531231	0.00330814	0.11509	0.0752768	0.170635	0.0723308	0.00120273	0.04261	0	0	0.00219537	0	0.38031	0.924637	High-fibrotic
TCGA-E9-A1N4	0.0293624	0.0621779	0.0159387	0.0460944	0	0.210864	0.0266162	0	0	0.0382647	0	0	0.0286102	0.198091	0.0656196	0.169362	0	0.00727699	0.101723	0	0	0	0	0.532206	0.854901	High-fibrotic
TCGA-AR-A1AS	0.047338	0	0.0142486	0	0	0.133358	0	0.020392	0	0	0	0.00188025	0.00516749	0.237415	0.026505	0.299453	0.0743772	0.0117195	0.062506	0.0150257	0	0.0506142	0	0.353391	0.942694	High-fibrotic
TCGA-C8-A273	0	0	0.162115	0.0478267	0	0.188655	0.00380304	0.010631	0.0148873	0	0	0.0328151	0	0.117784	0.0642296	0.194235	0.0379633	0.0219836	0.0895226	0.00392816	0	0.00962037	0	0.355011	0.935473	High-fibrotic
TCGA-A7-A26J	0.0606314	0	0.035379	0.00388263	0	0.246935	0	0.015462	0	0.0148767	0	0.00518044	0.0353469	0.0729498	0.0834	0.222523	0.0324391	0.00921131	0.140335	0	0	0.0214474	0	0.341643	0.940394	High-fibrotic
TCGA-D8-A140	0.0308966	0.01842	0.205454	0.107662	0	0.113043	0	0.0681609	0.00563612	0.0343662	0	0.0173981	0.00153702	0.0438029	0.0704705	0.148434	0	0.035573	0.0991453	0	0	0	0	0.471232	0.881849	High-fibrotic
TCGA-BH-A0HX	0.104194	0	0.0907942	0.0634891	0	0.243149	0	0.0149072	0.0129597	0.00928525	0	0.0177971	0.0606492	0.0912863	0.0680356	0.115543	0.0416654	0.00786694	0.057492	0	0	0.000886178	0	0.398868	0.916231	High-fibrotic
TCGA-C8-A12W	0	0.0413666	0.249482	0.0412598	0	0.113011	0	0	0.0474488	0	0	0.0466936	0	0.163015	0.0303783	0.125338	0	0.00534436	0.126494	0	0	0.0101687	0	0.484479	0.874908	High-fibrotic
TCGA-AO-A12H	0	0.0634176	0.0226016	0.116045	0	0.0647565	0.0127988	0.0185786	0	0.0141392	0	0.00196941	0	0.0844396	0.00402469	0.397519	0	0.00383636	0.175051	0	0.0208229	0	0	0.28527	0.968475	High-fibrotic
TCGA-AR-A2LE	0.0827135	0	0.0633524	0.124795	0	0.18356	0.00670634	0.0109429	0	0.0224943	0	0.00966941	0.000648532	0.0354244	0.0893103	0.149524	0.122666	0.0187428	0.0760933	0	0.00105392	0.00230253	0	0.294723	0.960409	High-fibrotic
TCGA-B6-A0RI	0	0.00377172	0.048797	0.00501059	0	0.23975	0	0.0178992	0.0504442	0	0.0367788	0.00561831	0.097354	0.105293	0.0406877	0.14359	0.0685294	0.025294	0.0876513	0.017038	0	0.00649258	0	0.282493	0.963801	High-fibrotic
TCGA-A2-A1FX	0	0.0329267	0.0597322	0.0699171	0	0.157484	0	0	0.00565028	0.0342145	0	0.0291671	0.00741302	0.048122	0.124524	0.23429	0.00727719	0	0.172205	0	0.000243482	0.0168326	0	0.396775	0.917181	High-fibrotic
TCGA-A2-A04V	0.00404589	0.000715386	0.0209011	0.0594241	0	0.193201	0.0147719	0.0217305	0.0317819	0	0	0.0609865	0.0549474	0.099657	0.0472321	0.129694	0.0754728	0.0145171	0.170921	0	0	0	0	0.410427	0.911503	High-fibrotic
TCGA-A2-A0CS	0.0102587	0	0	0.0711416	0	0.197283	0	0.0112043	0.0590946	0	0	0	0.00689644	0	0.0107422	0.146441	0.233302	0.0668963	0.176188	0	0	0.0105517	0	0.368348	0.929872	High-fibrotic
TCGA-AO-A03L	0.0466822	0	0.107921	0.11024	0	0.211742	0	0.0501906	0.00597251	0.00854391	0	0.021165	0.0789149	0.0407195	0.074373	0.113812	0	0.015754	0.11397	0	0	0	0	0.433729	0.900634	High-fibrotic
TCGA-GM-A2DM	0	0.00568455	0.0401378	0.125042	0	0.0840494	0	0.0134505	0	0.0046367	0	0.0441201	0.0904796	0.0826472	0.0650243	0.189585	0.196781	0.000162732	0	0.0358458	0.0177598	0.00459273	0	0.345429	0.940014	High-fibrotic
TCGA-A7-A0CD	0	0.00826887	0.132108	0.0722698	0	0.13666	0.0261702	0.0231553	0.00287771	0	0	0.0163209	0.00139909	0	0.0805312	0.23971	0.0294667	0	0.223059	0	0.00664414	0.00135952	0	0.269545	0.97115	High-fibrotic
TCGA-AO-A0J8	0.0353678	0	0.0284877	0.0971042	0	0.183935	0.0117073	0	0.0153053	0.0687029	0	0.00710699	0.00907645	0.183177	0.0782587	0.0806058	0.0481127	0.0162234	0.13397	0	0	0.00285865	0	0.450792	0.892716	High-fibrotic
TCGA-AC-A5EH	0	0.0183423	0.00619729	0.0111592	0	0.185872	0	0.0107733	0.0140944	0.0683734	0	0.0310556	0	0.196562	0.0821318	0.23038	0.00561197	0	0.139448	0	0	0	0	0.427921	0.903181	High-fibrotic
TCGA-A8-A08A	0	0.00735773	0.00622115	0.0552517	0	0.216363	0.0213367	0.0231423	0	0	0	0.0107717	0.0203069	0.130034	0.0788901	0.227604	0.0785311	0	0.124189	0	0	0	0	0.35836	0.934581	High-fibrotic
TCGA-BH-A0HW	0	0.00814514	0.0195441	0.0754016	0	0.0554088	0	0.0145545	0.0529847	0	0	0.017038	0	0.221864	0.0275684	0.29896	0	0.0906195	0.114237	0	0	0.00367409	0	0.138113	1.03907	High-fibrotic
TCGA-E2-A1IL	0.0840377	0	0.119616	0.0780311	0	0.144482	0	0.0534859	0.000203632	0.0140552	0	0.0217009	0.0352446	0.0482523	0.0946156	0.168333	0.0217021	0.0114171	0.0913878	0	0	0.013435	0	0.258578	0.975989	High-fibrotic
TCGA-E2-A154	0.0173565	0	0.0472467	0.0407125	0	0.152438	0	0.02968	0	0	0	0.0254421	0.0564717	0.0576435	0.0505968	0.353453	0	0.0440704	0.100891	0	0	0.0239977	0	0.196496	1.00213	High-fibrotic
TCGA-BH-A0EI	0.0397785	0	0.0411821	0.0283251	0	0.124806	0	0.0419579	0.0106853	0	0	0.0580587	0.0626158	0.0451386	0.012468	0.269762	0	0.0533728	0.20652	0	0	0.00533022	0	0.220658	0.989459	High-fibrotic
TCGA-AN-A0FW	0.0802151	0	0.0939899	0.161767	0	0.115292	0.0342967	0.0140896	0.0318184	0.0328751	0	0.00477166	0.0129992	0	0.0649891	0.161492	0.109304	0	0.0820998	0	0	0	0	0.389712	0.920134	High-fibrotic
TCGA-D8-A1XA	0.0155241	0.0202522	0.0581105	0.0585722	0	0.184633	0	0.00225308	0.0219164	0	0	0.0543843	0.0014622	0.0994767	0.0834309	0.160559	0.0281708	0	0.178462	0	0	0.0327921	0	0.331481	0.944867	High-fibrotic
TCGA-A8-A082	0	0	0.00277716	0.00269664	0	0.128906	0	0.0113968	0.014625	0	0	0.0285203	0.177778	0.0910642	0.0757997	0.377596	0.0038737	0	0.068755	0	0	0.0162119	0	0.297353	0.968143	High-fibrotic
TCGA-BH-A0B8	0.0200539	0	0.0404743	0.091619	0	0.140673	0.00509369	0	0	0.0489394	0	0.0397534	0.00163348	0.12201	0.0644038	0.14787	0.00932872	0.0357106	0.232437	0	0	0	0	0.273483	0.971187	High-fibrotic
TCGA-AN-A0FD	0.0294411	0	0.1153	0.139571	0	0.142633	0.00725131	0.0676801	0.0311054	0	0	0.0514487	0.00326716	0.105531	0.0706022	0.128926	0.0140025	0.0150207	0.0694507	0	0	0.00876984	0	0.379493	0.925248	High-fibrotic
TCGA-D8-A73W	0.0406976	0	0.077263	0.0897206	0	0.151104	0	0.0419183	0.0345181	0	0.00119656	0.00928929	0.0163774	0.118709	0.0886715	0.227409	0	0.00487647	0.0634024	0	0.000922587	0.0339243	0	0.355662	0.935403	High-fibrotic
TCGA-E2-A10B	0.0137944	0.0290464	0.00885245	0.0762443	0	0.169695	0.0598609	0	0.00856787	0.0852592	0	0	0.0220063	0.104115	0.0692296	0.146168	0.0840111	0	0.114468	0	0.00868067	0	0	0.32861	0.945647	High-fibrotic
TCGA-A8-A09X	0.0185277	0.0151169	0.116256	0.131746	0	0.156707	0.0388889	0.00414403	0.0346697	0.00110674	0	0.0286847	0.0355525	0.0583972	0.0661522	0.14052	0.0117625	0.0233621	0.118406	0	0	0	0	0.566421	0.841218	High-fibrotic
TCGA-E9-A2JS	0	0.00400467	0.0392924	0.119505	0	0.14426	0	3.3497e-05	0.061644	0	0	0.0192483	0.000990247	0.0694736	0.113682	0.217684	0.0222939	0	0.187888	0	0	0	0	0.325768	0.949142	High-fibrotic
TCGA-A8-A096	0.00303039	0	0.0417248	0.0890838	0	0.276041	0.032989	0.0057808	0	0	0	0.0437265	0.022029	0.0493097	0.115386	0.18985	0.0494275	0	0.0636194	0	0.018002	0	0	0.471605	0.882392	High-fibrotic
TCGA-B6-A0RG	0.0595901	0	0.0966046	0.0688457	0	0.113365	0	0.0525145	0.0153956	0	0	0.0464487	0.00531625	0.112271	0.0678633	0.119993	0.0832449	0.0122571	0.14629	0	0	0	0	0.253596	0.975639	High-fibrotic
TCGA-A8-A08F	0.00190636	0.00222489	0.00975853	0.0927958	0	0.134932	0.00538685	0.0195952	0	0	0	0.0721877	0.0748053	0.101117	0.143995	0.217496	0.0763254	0	0.0459723	0	0.00150158	0	0	0.546858	0.842525	High-fibrotic
TCGA-E2-A15H	0.0788784	0	0.171466	0.153927	0	0.105179	0	0.0383434	0	0	0	0.00585465	0.00615462	0.0924614	0.0938171	0.132051	0.0533915	0	0.0684756	0	0	0	0	0.365761	0.932209	High-fibrotic
TCGA-A8-A093	0.0373288	0	0.125818	0.0365369	0	0.0773317	0	0.00570596	0.0071801	0	0	0.0133819	0	0.118383	0.0569177	0.227801	0.0907037	0	0.196928	0	0	0.00598238	0	0.249682	0.981179	High-fibrotic
TCGA-EW-A1OZ	0.0243877	0.017315	0.0128478	0.0540052	0	0.167703	0	0	0	0	0	0.00963007	0	0.136283	0.0626358	0.263204	0.0456676	0.0319067	0.16795	0	0	0.00646455	0	0.461566	0.887833	High-fibrotic
TCGA-E9-A1NA	0	0.0285149	0.0486164	0.0415896	0	0.197546	0	0.000249984	0.00848534	0	0	0.0460436	0.0415665	0.117021	0.0386237	0.243074	0.0159218	0.0856048	0.0673809	0	0.00144533	0.0183172	0	0.395691	0.917686	High-fibrotic
TCGA-C8-A12N	0.0106823	0	0.0455938	0.0332827	0	0.127341	0	0.0478145	0.0448701	0	0	0.0249625	0.0285074	0.00722599	0.0813394	0.174226	0.238928	0	0.119194	0	0	0.016033	0	0.364244	0.930831	High-fibrotic
TCGA-C8-A12T	0.0267232	0	0.10896	0.128713	0	0.104866	0.000377742	0.0392931	0.032534	0	0	0.0296909	0.061467	0.0943317	0.0639089	0.111663	0.0247371	0.0604206	0.112314	0	0	0	0	0.361602	0.931915	High-fibrotic
TCGA-D8-A1XG	0	0.0296635	0.00365417	0	0	0.162966	0	0	0.0163361	0	0	0.0548543	0.00742104	0.0284279	0.0848406	0.269362	0.199389	0.0022322	0.137517	0	0	0.00333643	0	0.23308	0.987824	High-fibrotic
TCGA-E2-A2P5	0.00387489	0	0.0892734	0.142018	0	0.203401	0.00653586	0.0486202	0.00416021	0.0200371	0	0.0445261	0	0.032689	0.109222	0.113389	0.0331164	0	0.149138	0	0	0	0	0.355963	0.936717	High-fibrotic
TCGA-AR-A24K	0.0950217	0	0.0777393	0.0653909	0	0.218421	0.00663867	0.0365634	0.00320258	0	0	0.00246355	0.0892159	0.0206473	0.0444902	0.223991	0.046845	0.0472091	0.015291	0	0	0.00686975	0	0.16377	1.01374	High-fibrotic
TCGA-E9-A1RA	0.0864422	0.0496894	0.0408671	0.1272	0	0.125748	0.00189823	0.0165309	0	0.0199376	0	0.0136947	0.00796225	0.165371	0.0803661	0.134881	0.024378	0	0.105034	0	0	0	0	0.420824	0.906392	High-fibrotic
TCGA-B6-A0RN	0.0919669	0	0.135689	0.0987142	0	0.194555	0	0.0324075	0.0116858	0.0130142	0	0.0410579	0	0	0.045758	0.153111	0.0445341	0	0.127471	0	0	0.010036	0	0.27362	0.971808	High-fibrotic
TCGA-EW-A1PF	0.0645819	0.0104784	0.128872	0.0747482	0	0.185847	0	0.0315602	0	0	0	0.00937982	0.0206084	0.116599	0.0893823	0.126883	0.0409798	0	0.10008	0	0	0	0	0.466799	0.885647	High-fibrotic
TCGA-BH-A18T	0.0892539	0	0.063193	0.138861	0	0.104591	0.0438316	0.0828581	0	0	0	0.0283566	0	0.137971	0.0856824	0.153942	0	0.0117024	0.0416635	0	0	0.0180928	0	0.349516	0.938621	High-fibrotic
TCGA-A7-A13D	0.0299691	0.0340666	0.0297587	0	0	0.159913	0	0.0731841	0.00905025	0	0.00277981	0	0	0.393872	0.0783109	0.058695	0	0.0748773	0.00671778	0	0	0.0488047	0	0.281431	0.985189	High-fibrotic
TCGA-AR-A255	0.042432	0	0.0602419	0.0804515	0	0.159144	0.0347086	0	0.0209432	0.0225938	0	0.0244784	0.0134694	0.0855468	0.0758418	0.145049	0	0.0687806	0.161261	0	0	0.00505757	0	0.463477	0.888103	High-fibrotic
TCGA-A1-A0SO	0.081697	0	0.13582	0.0615483	0	0.19702	0.0229142	0.0650656	0	0	0	0.00691476	0.0135769	0.10133	0.121552	0.136713	0.0238709	0	0.0319762	0	0	0	0	0.327204	0.950282	High-fibrotic
TCGA-AR-A0TX	0.0470338	0.0194065	0.0845475	0.188073	0	0.0713643	0.0837885	0.034919	0.00412688	0.00986236	0	0.0209542	0.00928328	0.0361967	0.081254	0.15097	0.0626893	0.0128162	0.0827148	0	0	0	0	0.569526	0.839697	High-fibrotic
TCGA-E2-A15C	0.112453	0.0206987	0.150438	0.132055	0	0.140545	0	0.0640501	0	0	0	5.7549e-05	0	0.0507274	0.0736572	0.133944	0.00823387	0.0308015	0.082338	0	0	0	0	0.424551	0.904726	High-fibrotic
TCGA-BH-A0BW	0.0756943	0	0.0520204	0.0148189	0	0.212861	0.0440351	0.027238	0	0.029648	0	0.0487298	0.00442573	0.0779838	0.139526	0.145989	0	0.0907883	0.0241281	0	0	0.0121136	0	0.540701	0.845388	High-fibrotic
TCGA-E9-A1N9	0.0435188	0	0.0913709	0.0915835	0	0.264842	0.00792368	0.0311732	0.0125097	0.0593613	0	0.0233946	0.0156105	0.0674009	0.0981476	0.103339	0.0288572	0	0.0609678	0	0	0	0	0.374629	0.928247	High-fibrotic
TCGA-D8-A27K	0.132739	0	0.100743	0.0593332	0	0.218198	0.00833285	0.0409879	0	0.00978093	0	0.012153	0.0115305	0.0883922	0.107917	0.103066	0	0	0.106827	0	0	0	0	0.442828	0.895865	High-fibrotic
TCGA-A7-A13E	0.0558694	0	0.091322	0.149058	0	0.0622896	0	0.073725	0	0	0	0.0298369	0	0.25495	0.0557859	0.155892	0	0.0609472	0	0	0	0.0103242	0	0.262517	0.982854	High-fibrotic
TCGA-D8-A1XM	0.0381125	0.0137524	0.0389981	0.0831686	0	0.241133	0.0232398	0.000807288	0.000615613	0.0210672	0	0.00276532	0.0266117	0.0219061	0.082815	0.153809	0.133299	0	0.114491	0	0	0.00340833	0	0.506759	0.869932	High-fibrotic
TCGA-A8-A09A	0.0166999	0	0.0737881	0.130165	0	0.187356	0.0222652	0	0.00551586	0.000188243	0	0.0342975	0.0162278	0.0667613	0.120706	0.160962	0.036912	0	0.128155	0	0	0	0	0.454071	0.891199	High-fibrotic
TCGA-E2-A14Y	0.00312019	0	0.12404	0.0335135	0	0.132703	0.0267306	0.0941822	0	0	0.0419103	0.0257933	0	0.183104	0.0957819	0.119339	0.00487833	0.0732285	0	0.0261015	0	0.0155732	0	0.329252	0.94939	High-fibrotic
TCGA-E2-A15M	0.0456473	0.0438653	0.0139432	0.0596677	0	0.26527	0.026245	0.0515278	0	0.0523932	0	0.0029656	0.0387823	0.0489443	0.0742127	0.116355	0.0647362	0.0345514	0.0608926	0	0	0	0	0.562467	0.840222	High-fibrotic
TCGA-B6-A1KF	0.153261	0	0.0660787	0.0121939	0	0.0255098	0	0.0983216	0.00879209	0	0	0.0255557	0.00401609	0.371633	0	0.181164	0	0.0449991	0.00847511	0	0	0	0	0.250306	1.00172	High-fibrotic
TCGA-BH-A18R	0.076228	0	0.100854	0.0996382	0	0.119904	0.0603224	0.0475619	0	0.0198299	0	0.0237361	0.0139866	0.0196494	0.0863778	0.133857	0.107766	0.0143686	0.0759207	0	0	0	0	0.424808	0.905152	High-fibrotic
TCGA-BH-A1FE	0.116857	0	0.0377707	0.105773	0	0.20111	0.0405713	0.0292743	0.00591137	0.0136785	0	0.0261301	0.0163832	0.0296384	0.098375	0.0887945	0.0606686	0.0202218	0.108842	0	0	0	0	0.559274	0.841316	High-fibrotic
TCGA-AO-A0JG	0.0464956	0.0182867	0.074499	0.195855	0	0.168152	0.0242381	0.0401387	0	0.0266575	0	0.0286462	0.00179517	0.0366018	0.0967482	0.13513	0.0356714	0	0.071085	0	0	0	0	0.516667	0.85918	High-fibrotic
TCGA-AR-A24M	0.0381055	0	0.145882	0	0	0.17555	0	0	0	0.00730441	0	0.000182591	0.0430913	0.066019	0.0607024	0.214587	0.0253098	0	0.197143	0	0	0.0261235	0	0.342993	0.940596	High-fibrotic
TCGA-D8-A1XT	0.0289046	0	0.00861355	0.0740593	0	0.127933	0	0.0655905	0.00796944	0	0	0.051156	0.0227931	0.159213	0.135552	0.263974	0	0.0116245	0.0307383	0	0	0.0118788	0	0.461407	0.886327	High-fibrotic
TCGA-AC-A8OP	0.0833529	0.0225794	0.0585945	0.101348	0	0.191832	0	0.0511855	0	0	0	0.0305211	0.049134	0.106689	0.0963152	0.127202	0.00994247	0	0.0575124	0.012489	0.00130223	0	0	0.396106	0.917524	High-fibrotic
TCGA-A2-A0T3	0.0914839	0	0.0635801	0.101215	0	0.135498	0.00994569	0.0266728	0.011157	0.0195004	0	0	0.00161186	0.209674	0.0940057	0.188838	0.00370559	0	0.0431123	0	0	0	0	0.348158	0.940715	High-fibrotic
TCGA-B6-A0IN	0.103543	0.0325249	0.0856116	0.0760492	0	0.216659	0.0176829	0.0408024	0	0.0229161	0	0	0.00316471	0.0588004	0.0723747	0.135466	0.0858141	0	0.0485906	0	0	0	0	0.54794	0.8467	High-fibrotic
TCGA-BH-A0DX	0.00833102	0.00138566	0.0379649	0.0680192	0	0.114094	0	0.0364626	0.0133897	0.0348239	0	0.0216155	0.0133728	0.196113	0.0520962	0.16055	0.0715158	0.0326739	0.137199	0	0	0.00039312	0	0.535378	0.853722	High-fibrotic
TCGA-A2-A04N	0.0432128	0.0669719	0.0889501	0.0901775	0	0.181812	0	0.0330603	0	0.0126953	0	0.0116806	0.00665335	0.0557132	0.0632913	0.154465	0.0284293	0	0.162888	0	0	0	0	0.372379	0.927736	High-fibrotic
TCGA-AR-A24X	0.1171	0	0.0953969	0.0932471	0	0.266079	0.0159059	0.0535235	0	0.0261293	0	0.01993	0.00377002	0.0131352	0.0950345	0.12909	0.0344192	0	0.0237884	0	0.0111141	0.00233779	0	0.344232	0.944048	High-fibrotic
TCGA-BH-A0DS	0.0298247	0.0337632	0.116873	0.184751	0	0.104928	0	0.0136306	0	0.0086243	0	0.0188096	0.0148372	0.114897	0.0698906	0.157465	0.0767126	0	0.0549943	0	0	0	0	0.513362	0.863629	High-fibrotic
TCGA-BH-A0AY	0.0169296	0	0.0414101	0.186692	0	0.142608	0.00640766	0	0.000865193	0.0208078	0	0.0346817	0.0179518	0.0614136	0.0790013	0.181417	0.0377051	0	0.172109	0	0	0	0	0.488504	0.875327	High-fibrotic
TCGA-A2-A4S1	0	0.00125468	0.00625329	0.0385998	0	0.207548	0	0	0.00185572	0	0	0.0751591	0.00130121	0.0867984	0.0721757	0.381487	0.0168062	0	0.0971139	0	0	0.0136468	0	0.483541	0.875495	High-fibrotic
TCGA-A8-A07J	0.0447128	0	9.11333e-05	0.0625548	0	0.188512	0	0.00646001	0.0173907	0.00897902	0	0.0391614	0.0302721	0.129145	0.0521475	0.161063	0.107579	0.00380609	0.127789	0	0	0.0203349	0	0.468495	0.885837	High-fibrotic
TCGA-AO-A03V	0.066423	0	0.178855	0	0	0.256322	0	0	0	0.0366019	0.0466461	0	0.00469117	0.113569	0.113711	0.123045	0.0173403	0	0.0359777	0	0.00681798	0	0	0.363564	0.934021	High-fibrotic
TCGA-BH-A0B7	0.097337	0	0.0650407	0.130391	0	0.178054	0.0400602	0.0300378	0	0.0314233	0	0.0210268	0.0118591	0.0767777	0.0758043	0.113898	0.0301788	0.0279776	0.0701343	0	0	0	0	0.560839	0.840504	High-fibrotic
TCGA-BH-A18I	0.0797984	0	0.0669717	0.0995042	0	0.211667	0.0278595	0.0450313	0	0	0	0.0145543	0.0134341	0.0381582	0.0914935	0.0933924	0.096589	0.0207578	0.100788	0	0	0	0	0.519435	0.862108	High-fibrotic
TCGA-GM-A2DL	0.00151987	0	0.0822462	0.0368533	0	0.176087	0.000621799	0.0334437	0.0227456	0.00528159	0	0.0423621	0.00474586	0.106092	0.0701602	0.234045	0.0702518	0.0412816	0.0683551	0	0	0.00390766	0	0.436902	0.899473	High-fibrotic
TCGA-BH-A0BC	0.0440689	0	0.0414347	0.0884121	0	0.189541	0	0.0261557	0.0602861	0.00804789	0	0.0153493	0.0454825	0.076763	0.109234	0.143008	0.0837455	0.000382087	0.0550374	0	0	0.0130519	0	0.509097	0.865809	High-fibrotic
TCGA-E2-A153	0	0.0190431	0.0148931	0.0155218	0	0.177249	0	0.0348926	0.00658083	0	0	0.0370931	0.108598	0.0676539	0.0213857	0.255829	0.00129654	0.0647213	0.158836	0	0	0.0164059	0	0.360955	0.932606	High-fibrotic
TCGA-AO-A126	0.0223281	0	0.0847102	0.131435	0	0.214047	0	0.0395872	0.0296638	0	0	0.00714076	0.0307266	0	0.0759431	0.195925	0	0.0116038	0.15689	0	0	0	0	0.362204	0.932677	High-fibrotic
TCGA-BH-A0HA	0.0350622	0.00252538	0.103831	0.122932	0	0.103246	0.010838	0	0.0408279	0.049107	0	0.0183459	0.0059688	0.0149777	0.102015	0.148337	0.0157464	0.047559	0.178681	0	0	0	0	0.49638	0.87134	High-fibrotic
TCGA-B6-A0RH	0	0.00291963	0.180647	0.0449424	0	0.0644421	0.00414556	0.0617119	0.0455913	0.0039562	0	0.0605403	0	0.127528	0.0929978	0.122671	0.00719667	0.0279767	0.152733	0	0	0	0	0.404039	0.914069	High-fibrotic
TCGA-D8-A27T	0.0460357	0	0.104438	0.12081	0	0.177454	0	0	0	0.0186394	0	0.0588957	0.0159206	0.0489235	0.10347	0.175277	0.0230516	0	0.107085	0	0	0	0	0.493355	0.872483	High-fibrotic
TCGA-AC-A3W5	0.0457393	0.0214299	0.0497659	0.143539	0	0.0616234	0.0232351	0.0559982	0.0109781	0	0	0.0736718	0.0186375	0.122702	0.113022	0.115672	0.0436118	0	0.100374	0	0	0	0	0.537275	0.851513	High-fibrotic
TCGA-E2-A1LE	0.0207368	0.011841	0.00473009	0.295001	0	0.0882929	0.0626975	0.0377309	0	0	0	0.0256552	0.0309726	0.0865166	0.101566	0.155931	0.0231986	0	0.0551297	0	0	0	0	0.52253	0.855024	High-fibrotic
TCGA-AN-A0XS	0.0558788	0	0.162644	0.177869	0	0.12871	0.00445509	0.0291896	0.04425	0	0	0.0253646	0.0485867	0.0389814	0.073455	0.0939912	0.0505805	0.00504653	0.0609975	0	0	0	0	0.518673	0.858814	High-fibrotic
TCGA-E2-A9RU	0.00233846	0	0.0786026	0.171929	0	0.0667756	0	0	0.00279195	0	0	0.0278701	0.0165201	0.209466	0.0867143	0.276494	0.00956547	0.00556716	0.0438505	0	0	0.0015146	0	0.396181	0.919166	High-fibrotic
TCGA-BH-A0B5	0.0789083	0	0.0535619	0.0408582	0	0.209799	0	0	0	0.0284892	0	0.0334167	0.0136705	0.0961194	0.0709086	0.154573	0.036487	0.00584575	0.175762	0	0.00160107	0	0	0.454253	0.89238	High-fibrotic
TCGA-D8-A141	0.0569141	0.0187143	0.0542701	0.173265	0	0.140921	0.0454482	0.0254083	0.0351033	0	0	0.0155738	0.0173594	0.0745793	0.0924984	0.113495	0.0495845	0.00922058	0.0776445	0	0	0	0	0.582028	0.830516	High-fibrotic
TCGA-B6-A0X7	0.0148739	0	0.143561	0.0788404	0	0.164888	0	0.00262529	0.0149952	0	0	0.0588201	0.00641367	0.0486626	0.0809882	0.120537	0.0524291	0	0.212365	0	0	0	0	0.300607	0.958836	High-fibrotic
TCGA-B6-A40B	0.109362	0	0.115406	0.0547808	0	0.101553	0	0.0723786	0	0	0	0.00705288	0	0.086787	0.0280745	0.12226	0.0689763	0.0543046	0.144551	0.00353801	0	0.0309759	0	0.350677	0.936627	High-fibrotic
TCGA-E2-A10F	0.048554	0	0.0618977	0.0842753	0	0.251672	0.0018498	0.0207091	0.0343219	0	0	0.0270849	0.0266564	0.0970984	0.0696884	0.120375	0.0247325	0.0237574	0.100001	0	0	0.00732562	0	0.444528	0.895842	High-fibrotic
TCGA-AC-A7VC	0	0.00119792	0.00764485	0.0400863	0	0.0823273	0.0134658	0.0508262	0.00767637	0	0.0232525	0.0184234	0	0.354232	0.029353	0.20095	0.12897	0	0.0415942	0	0	0	0	0.490938	0.871269	High-fibrotic
TCGA-AR-A1AU	0.00743754	0	0.169751	0.0314159	0	0.206055	0	0	0	0.0261095	0	0.0597088	0.0156165	0.107194	0.0594863	0.161272	0.020835	0.00801225	0.127107	0	0	0	0	0.339391	0.942258	High-fibrotic
TCGA-A8-A07R	0.142023	0	0.177933	0.0341581	0	0.126846	0.0307718	0.0417194	0.00648723	0	0	0	0	0.13374	0.112062	0.134697	0	0.00856524	0.000240785	0	0	0.0507557	0	0.290299	0.973407	High-fibrotic
TCGA-A2-A1FZ	0.0175404	0	0.0924973	0.0372156	0	0.211151	0.0141871	0	0.00086493	0.00216517	0	0.0152629	0.0160471	0.0808503	0.0871179	0.162049	0.130276	0	0.124328	0	0.00278348	0.00566431	0	0.417146	0.908914	High-fibrotic
TCGA-AR-A251	0.0766304	0	0.0311728	0.0775315	0	0.232126	0.049708	0.0457746	0	0.0132833	0	0	0.00845792	0.0959	0.0777706	0.15731	0	0.120954	0.00588449	0	0	0.0074958	0	0.355801	0.937063	High-fibrotic
TCGA-E2-A1LL	0	0.00946966	0.0866023	0.0402123	0	0.090323	0.0014991	0.0820685	0	0	0	0.0240732	0.0286929	0.126057	0.0869837	0.19426	0.133176	0.0117781	0.0848043	0	0	0	0	0.300352	0.958133	High-fibrotic
TCGA-AR-A24O	0.0492299	0	0.0708022	0.0389421	0	0.196678	0.00710016	0.0474296	0	0.0690588	0	0.0228439	0.0168898	0.0703902	0.0714895	0.14945	0.0171638	0.0308232	0.138627	0	0.0030821	0	0	0.426313	0.904408	High-fibrotic
TCGA-AR-A24Q	0.0434789	0	0.116829	0.129616	0	0.170882	0.0199446	0.0343469	0	0.0401968	0	0.0268291	0.00774618	0.101849	0.0723098	0.105893	0.0425546	0.0187091	0.0688148	0	0	0	0	0.544492	0.84819	High-fibrotic
TCGA-AR-A0U4	0	0.00081183	0.0252128	0.0761722	0	0.207321	0.0493169	0.00954	0	0	0	0.0131139	0.0648009	0.107836	0.120916	0.141875	0.135258	0	0.00301315	0	0	0.0448127	0	0.573349	0.831833	High-fibrotic
TCGA-D8-A1XW	0	0.00760914	0.0849921	0.0164186	0	0.196798	0.0123908	0.0126328	0.0225211	0	0	0.0570809	0.089021	0.0385304	0.100295	0.261508	0.019777	0.0121354	0.0682898	0	0	0	0	0.426051	0.904261	High-fibrotic
TCGA-E2-A14Z	0.0539312	0	0.0624022	0.168939	0	0.116754	0.0431212	0.0420107	0.0292552	0	0	0.0292139	0.0421649	0.0356615	0.0823345	0.119939	0.0457995	0.0207195	0.107754	0	0	0	0	0.559579	0.843535	High-fibrotic
TCGA-B6-A0RS	0.00824905	0.0196724	0.133965	0.126777	0	0.0714483	0.0530283	0.0681205	0.00886272	0	0	0.0309772	0.0126938	0.0913239	0.115322	0.166557	0.0330063	0.0055675	0.0544286	0	0	0	0	0.496889	0.870923	High-fibrotic
TCGA-D8-A1JL	0.0153055	0.025207	0.0031021	0.0612516	0	0.105308	0.140652	0.0554454	0.0105678	0.0402946	0	0.027616	0	0.110096	0.112509	0.143845	0	0.0689348	0.0608262	0	0	0.0190393	0	0.542525	0.847863	High-fibrotic
TCGA-C8-A135	0.0806001	0	0.107129	0.183017	0	0.159823	0.0103135	0.0345562	0.0302038	0.021532	0	0	0.0653438	0.0129991	0.0650495	0.132209	0.0287439	0.00904191	0.0594385	0	0	0	0	0.413669	0.90963	High-fibrotic
TCGA-A2-A0SU	0.0501612	0	0.052428	0.161466	0	0.147779	0.00130997	0.0413783	0.0476395	0.013651	0	0.0199698	0.0217017	0.0674302	0.0795429	0.105565	0.0982557	0.0137416	0.0779803	0	0	0	0	0.409885	0.911277	High-fibrotic
TCGA-AQ-A1H3	0.0805769	0	0.0582811	0.127398	0	0.230188	0	0.0542214	0	0	0	0	0.0184231	0.0254502	0.0787158	0.112997	0.130054	0.0224878	0.0612054	0	0	0	0	0.433581	0.900573	High-fibrotic
TCGA-A2-A259	0.095569	0	0.037439	0.0297436	0	0.177782	0.0786557	0.00707828	0.0290073	0	0.000945291	0	0.0366277	0.0319025	0.0680297	0.0876885	0.0915301	0.0336778	0.187355	0	0.00350879	0.00346009	0	0.485406	0.881262	High-fibrotic
TCGA-BH-A0DV	0.0743543	0	0.0748198	0.113686	0	0.155417	0	0.0455322	0	0.0149977	0	0.0371831	0.00864612	0.0276475	0.0323858	0.212346	0.0542978	0	0.14828	0	0	0.000407433	0	0.40284	0.914607	High-fibrotic
TCGA-AR-A1AX	0.112702	0	0.053633	0.143451	0	0.147637	0.0441413	0.0353274	0.0171621	0.0132853	0	0.00501497	0.0267301	0.0397387	0.0812913	0.109005	0	0.0175267	0.153353	0	0	0	0	0.584756	0.829187	High-fibrotic
TCGA-D8-A27M	0.0885365	0.00925143	0.0641436	0.0938692	0	0.196538	0.054654	0.0324682	0	0	0	0.0292502	0.0283837	0.0211174	0.108147	0.132422	0.0567571	0.0261249	0.0583364	0	0	0	0	0.551585	0.845347	High-fibrotic
TCGA-BH-A18V	0	0.0677633	0.0551214	0.0704512	0	0.130057	0.00661563	0.0687096	0	0	0	0.028449	0.00826094	0.11712	0.123379	0.181246	0.0633309	0.0631242	0.00436482	0	0	0.0120072	0	0.551088	0.841686	High-fibrotic
TCGA-B6-A409	0	0.0371806	0.132567	0.150944	0	0.113676	0	0.0476219	0.0488481	0	0	0.033991	0.0147187	0.0694351	0.116384	0.133755	0.0238606	0.0266117	0.0405982	0	0	0.00980837	0	0.373864	0.928548	High-fibrotic
TCGA-A2-A1G0	0.0530261	0	0.138732	0.0811486	0	0.187256	0.0265328	0.0339257	0	0.0562318	0	0	0.0122754	0	0.0681197	0.165189	0.107074	0	0.0704891	0	0	0	0	0.470765	0.884324	High-fibrotic
TCGA-A7-A26G	0.0461452	0	0.157067	0.0506387	0	0.272857	0.0460823	0	0	0.00868158	0	0.00301102	0.0184353	0.102454	0.0797506	0.0688182	0.0480679	0	0.0969544	0	0	0.00103592	0	0.493285	0.873349	High-fibrotic
TCGA-BH-A208	0.0988994	0	0.136948	0.104263	0	0.134559	0.0181254	0.0310649	0.00178119	0.0103329	0	0.0148213	0.0346632	0.0492045	0.0490105	0.133798	0.00367632	0.0645555	0.114297	0	0	0	0	0.416269	0.908514	High-fibrotic
TCGA-E2-A1B1	0.0689988	0	0.0655248	0.0548157	0	0.239163	0.0373627	0.0250037	0.00712106	0.00813328	0	0.0249406	0.021258	0.0477016	0.0913586	0.105964	0.103568	0.0242196	0.0748667	0	0	0	0	0.547945	0.849911	High-fibrotic
TCGA-AR-A0TS	0.169601	0	0.0678193	0.0849922	0	0.198184	0.038693	0.0127306	0.0420635	0	0.0261013	0	0.0316146	0.0376989	0.0768358	0.133314	0.0231891	0.0277406	0.0294217	0	0	0	0	0.632365	0.800632	High-fibrotic
TCGA-BH-A0AV	0.0590924	0	0.067789	0.0568654	0	0.177674	0.0351063	0.0107537	0.0167522	0	0	0	0.0199865	0.199141	0.0476556	0.220716	0.0317161	0.00162076	0.0518157	0	0	0.00331529	0	0.430055	0.902452	High-fibrotic
TCGA-B6-A402	0	0.0219997	0.104296	0.0170204	0	0.0697155	0	0.0819966	0	0.0243211	0	0.0154721	0	0.374155	0.0791342	0.190643	0.0193825	0	0.00186492	0	0	0	0	0.3358	0.957506	High-fibrotic
TCGA-D8-A1XQ	0.0109875	0.00459734	0.162087	0.0756089	0	0.197075	0.0267395	0.0238925	0.0108174	0.0063197	0	0.0380615	0.00785171	0.14071	0.0893438	0.164297	0	0.0191408	0.0144727	0	0	0.0079977	0	0.553618	0.840492	High-fibrotic
TCGA-LL-A73Y	0.0869542	0.0514644	0.0371664	0.0588746	0	0.235343	0.000247556	0.0236049	0	0.00632972	0	0.0367176	0.0192832	0.148981	0.0497042	0.0731024	0.105552	0.0654958	0.00117992	0	0	0	0	0.559132	0.839797	High-fibrotic
TCGA-B6-A0WX	0.103543	0	0.0768447	0.108647	0	0.175728	0	0.0702438	0.00947907	0.0246911	0	0.0333278	0.00826392	0.0581028	0.0936062	0.0977527	0.0377808	0.0358597	0.0661301	0	0	0	0	0.470148	0.882787	High-fibrotic
TCGA-A2-A0YM	0.0264288	0	0.0404326	0.0594903	0	0.130192	0	0.0133117	0.00409058	0.0447839	0	0.0314975	0.034616	0.176645	0.131655	0.10652	0.126044	0.0318415	0	0.0396353	0.0028155	0	0	0.52439	0.854382	High-fibrotic
TCGA-C8-A132	0.0754778	0	0.11059	0.13294	0	0.171403	0.0303528	0.041869	0.00791959	0.0179392	0	0.0169731	0.0167038	0.0693047	0.0703608	0.109463	0.0604117	0.0325685	0.0357227	0	0	0	0	0.575561	0.832489	High-fibrotic
TCGA-BH-A5IZ	0.00805526	0	0.114202	0.124609	0	0.0883481	0	0.0174291	0	0	0	0.0186299	0.0526984	0.219306	0.0522493	0.192171	0	0.0766922	0	0.0190265	0	0.0165825	0	0.371847	0.930139	High-fibrotic
TCGA-A2-A0EN	0.0394917	0.032439	0.0458695	0.159547	0	0.176816	0.00926506	0.0324628	0.0387145	0	0.00123025	0.000696489	0.0209342	0.024694	0.081484	0.123922	0.0941778	0.0124905	0.104044	0	0	0.00172161	0	0.548178	0.84799	High-fibrotic
TCGA-E2-A1B0	0.0699791	0	0.083461	0.120227	0	0.163993	0.0296496	0.0570923	0	0.00597786	0	0.0101865	0.0124129	0.126478	0.082001	0.119058	0.0296356	0.0507012	0.0391464	0	0	0	0	0.447681	0.893938	High-fibrotic
TCGA-BH-A1EU	0.0641369	0.0510589	0.0125888	0.0392274	0	0.13572	0.0510998	0.0981925	0	0.0538892	0	0.0150555	0.0111083	0.0439125	0.0562815	0.174609	0.0404697	0.050158	0.102492	0	0	0	0	0.532885	0.858477	High-fibrotic
TCGA-EW-A1P4	0.0487146	0	0.0482707	0.188139	0	0.0836817	0.0756928	0.0689731	0	0	0	0.0768858	0.00836918	0.00890464	0.0868218	0.0868534	0.119964	0.019024	0.0444106	0	0	0.035294	0	0.520203	0.858826	High-fibrotic
TCGA-E2-A1AZ	0.0976907	0	0.0541873	0.0693707	0	0.203027	0.0464126	0.06222	0	0.0423821	0	0.0156186	0.031243	0.0396665	0.0985968	0.120276	0.0365337	0.035474	0.0473006	0	0	0	0	0.523216	0.858256	High-fibrotic
TCGA-B6-A0RE	0.0139064	0	0.201211	0.102592	0	0.0627799	0.0377873	0.096272	0	0	0	0.0232494	0	0.202385	0.0453983	0.146324	0	0.0628932	0	0	0.00375158	0.00144948	0	0.353677	0.93967	High-fibrotic
TCGA-A1-A0SH	0.0228384	0	0.1215	0.0370485	0	0.190232	0	0	0.0117194	0	0	0.0512451	0	0.110072	0.0108343	0.231507	0	0.00898359	0.20402	0	0	0	0	0.370791	0.929096	High-fibrotic
TCGA-BH-A0B3	0.00570608	0.0282084	0.192229	0.155577	0	0.0631721	0.0383035	0.0344125	0.0202155	0	0	0.0379401	0.0221738	0.0859896	0.0950016	0.132381	0.0321738	0.0141548	0.0287844	0	0	0.0135768	0	0.537399	0.848969	High-fibrotic
TCGA-BH-A1FU	0.0760134	0	0.0752518	0.0728607	0	0.200477	0.0333084	0.0245113	0.0292168	0.028482	0	0.0111309	0.00953996	0.0801782	0.071715	0.0900702	0.0837257	0.0232903	0.0902284	0	0	0	0	0.517903	0.863887	High-fibrotic
TCGA-A2-A0EX	0.100798	0	0.100691	0.0736075	0	0.23167	0	0.00483567	0.0371812	0	0	0.0090919	0.00475967	0.0523769	0.0536719	0.135412	0.0678703	0.00551634	0.122517	0	0	0	0	0.406111	0.913119	High-fibrotic
TCGA-A2-A0CM	0.0173296	0.0152505	0.092555	0.134945	0	0.154624	0.0981387	0.0304982	0.0345534	0	0	0.0231507	0.0398978	0.104181	0.0982264	0.102803	0.0119997	0.022895	0.0189517	0	0	0	0	0.543279	0.847675	High-fibrotic
TCGA-AN-A0AL	0.115382	0	0.136239	0.0646405	0	0.150958	0.00755373	0.0448706	0.0116146	0	0	0.0459551	0.0150864	0.0763833	0.0698649	0.127584	0	0.0570213	0.0768463	0	0	0	0	0.517196	0.86028	High-fibrotic
TCGA-E2-A1IO	0.0725945	0	0.0910929	0.104806	0	0.242392	0	0.062139	0	0	0	0.0272474	0.0181005	0.0488215	0.0824242	0.124267	0.0293421	0.00790076	0.0888716	0	0	0	0	0.444576	0.895237	High-fibrotic
TCGA-GI-A2C9	0.00932587	0.00879995	0	0.0711156	0	0.173382	0	0.039431	0.0312788	0	0	0.032276	0.0581613	0.0270619	0.0447343	0.160833	0.144163	0.117698	0.0817385	0	0	0	0	0.356792	0.934387	High-fibrotic
TCGA-A2-A0ES	0.0495418	0	0.0631161	0.100745	0	0.251853	0.00274836	0.000582931	0	0.0142929	0	0.0141556	0.0295615	0	0.0648795	0.280481	0.0094921	0.0366968	0.0795789	0	0.00227493	0	0	0.384646	0.922506	High-fibrotic
TCGA-BH-A0DQ	0.044945	0	0.114535	0.0730833	0	0.186192	0	0	0.0358252	0.00151278	0	0.0354763	0.0196364	0.112341	0.0573424	0.152224	0.00104957	0	0.165837	0	0	0	0	0.419347	0.907398	High-fibrotic
TCGA-A2-A25F	0.0790995	0.0192499	0.0328267	0.085153	0	0.151227	0.117161	0.0316611	0	0.0368104	0	0.022463	0.00922822	0.0557666	0.0695575	0.132691	0.041673	0.0479169	0.0621399	0	0	0.00537483	0	0.654943	0.799921	High-fibrotic
TCGA-A2-A0YH	0.010738	0	0.128923	0.0351565	0	0.187052	0	0	0.0295838	0.00091948	0	0.0264294	0.027662	0.0900207	0.0780456	0.139092	0.00251481	0.0607806	0.154036	0	0	0.029046	0	0.494839	0.874069	High-fibrotic
TCGA-A8-A07E	0.0135801	0.00485326	0	0.0551476	0	0.255295	0.0125394	0	0.0171354	0.042487	0	0.0353103	0.0179352	0.022608	0.108161	0.173576	0.0548904	0	0.186481	0	0	0	0	0.417782	0.907741	High-fibrotic
TCGA-BH-A0H3	0.00447578	0.014931	0.0917725	0.115456	0	0.264903	0	0.00269696	0.0135355	0.0282436	0	0.0230947	0.0263161	0.0561932	0.0758679	0.149692	0.0631518	0.000860147	0.0681348	0	0	0.00067435	0	0.391737	0.919517	High-fibrotic
TCGA-AR-A1AY	0.0163754	0	0.0202038	0.0433876	0	0.152026	0	0.0181884	0	0	0	0.0498497	0.0153022	0.334079	0.113641	0.112334	0.030795	0	0.0858859	0	0	0.00793227	0	0.364167	0.937604	High-fibrotic
TCGA-A1-A0SI	0.0216276	0.00235711	0.132535	0.0869789	0	0.0270111	0.00736829	0.117146	0	0.0836172	0	0.0834053	0	0.112732	0.0977826	0.07433	0.0152388	0.013703	0.124167	0	0	0	0	0.482716	0.87628	High-fibrotic
TCGA-C8-A131	0.0186583	0	0.128664	0.0750506	0	0.17981	0.0353175	0	0	0.0028519	0	0	0.060422	0.172609	0.0565183	0.199081	0.00953195	0.0445465	0	0.0010403	0	0.0158982	0	0.428412	0.902981	High-fibrotic
TCGA-D8-A1JK	0.00696824	0	0.126474	0.0969102	0	0.103404	0.0254299	0.0670033	0.0281737	0	0	0.0289336	0.0153042	0.111663	0.118359	0.14818	0.106318	0.00383029	0	0.00654684	0	0.00650134	0	0.530616	0.853569	High-fibrotic
TCGA-BH-A1FB	0.0869476	0.00835778	0.0583855	0.141117	0	0.166314	0.0276288	0.0486015	0.00388075	0	0	0	0.0300321	0.015487	0.0887845	0.121722	0.10385	0	0.0988914	0	0	0	0	0.552772	0.847069	High-fibrotic
TCGA-E2-A14X	0.05021	0.0793759	0.119825	0.0887121	0	0.197624	0.0536496	0.0659394	0	0.0105714	0	0.0201282	0.00468795	0.0450612	0.099889	0.113451	0.0508751	0	0	0	0	0	0	0.547389	0.842336	High-fibrotic
TCGA-AN-A0G0	0	0.000172689	0.145348	0	0	0.154176	0.0298542	0.0586469	0	0	0.0149229	0.0390004	0.010591	0.212741	0.0904202	0.186965	0.0255991	0	0.0250952	0	0	0.00646688	0	0.378342	0.926685	High-fibrotic
TCGA-E9-A1QZ	0.0735215	0.030844	0.0419911	0.128879	0	0.201873	0.0242272	0.0293057	0	0.062206	0	0.0110552	0.000795515	0.00986664	0.0727597	0.114891	0.0769274	0.0208849	0.0999727	0	0	0	0	0.580868	0.830064	High-fibrotic
TCGA-AR-A1AL	0.0922509	0	0.0617021	0.104292	0	0.217064	0.0358979	0	0	0.0119509	0	0	0.0325988	0	0.035074	0.158035	0.142673	0.00909381	0.0810105	0	0.00843541	0.00992021	0	0.382433	0.923328	High-fibrotic
TCGA-E9-A244	0.0172374	0.0382432	0.0685543	0.128515	0	0.112849	0	0.105609	0	0.0537067	0	0	0	0.161932	0.131178	0.0719286	0.0703864	0.0285974	0.0112631	0	0	0	0	0.373956	0.929638	High-fibrotic
TCGA-AR-A2LQ	0.0672104	0	0.167711	0.0698232	0	0.130524	0	0.0166209	0	0.00678787	0	0.0200946	0.00893343	0.0339133	0.0445733	0.222043	0.0761339	0.0160119	0.119619	0	0	0	0	0.457707	0.890155	High-fibrotic
TCGA-EW-A1P1	0.0247143	0	0.0104609	0.163637	0	0.182959	0.0124865	0.0467887	0	0	0	0.0449957	0.0377415	0.0579273	0.0853908	0.148903	0.112687	0.0186048	0.0494705	0	0.00323185	0	0	0.487763	0.874699	High-fibrotic
TCGA-A2-A0T2	0.071223	0	0.0279997	0.206883	0	0.0731504	0.0525448	0.0856299	0.0191367	0	0	0.0381175	0.00901787	0.139109	0.0760053	0.138545	0.003263	0	0.0326322	0	0	0.0267426	0	0.292641	0.965611	High-fibrotic
TCGA-D8-A27F	0.145449	0	0.099146	0.0617238	0	0.155583	0	0.0102645	0	0	0.0105339	0.0014406	0.0402242	0.155896	0.0469945	0.142156	0.06909	0.0220179	0	0.0198828	0.0136451	0.00595201	0	0.400968	0.915585	High-fibrotic
TCGA-D8-A146	0.0812277	0.00252001	0.0664513	0.0825576	0	0.149234	0	0.0452213	0	0	0	0.0379491	0.0252186	0.0881183	0.0562563	0.13438	0.0595727	0.00165799	0.169636	0	0	0	0	0.436145	0.90063	High-fibrotic
TCGA-E2-A1LK	0	0	0.0173115	0.0855498	0	0.0522399	0	0.0374682	0.000767902	0	0	0.0283277	0.0178978	0.417137	0.0512051	0.135762	0.0342332	0.0930673	0.0290322	0	0	0	0	0.343453	0.957584	High-fibrotic
TCGA-D8-A27V	0.0908323	0	0.0654697	0.0456367	0	0.288091	0.0353523	0.00514131	0	0.0395451	0	0.000466853	0.0118996	0	0.100239	0.138375	0.099782	0	0.0791698	0	0	0	0	0.28783	0.963963	High-fibrotic
TCGA-BH-A1F0	0.0995644	0.0272893	0.0756858	0.0427962	0	0.168419	0.0266063	0.0558945	0	0.0437484	0	0.0372182	0.0529823	0.042931	0.0861197	0.170512	0.0098277	0.0391301	0.0212754	0	0	0	0	0.595186	0.822733	High-fibrotic
TCGA-BH-A201	0.0451521	0	0.111519	0.0311553	0	0.173948	0	0.034441	0	0	0	0.03089	0.0118399	0.141324	0.0734473	0.147098	0.0913059	0.0154666	0.0752632	0	0.00863416	0.00851555	0	0.337148	0.942489	High-fibrotic
TCGA-A2-A0YI	0.0465015	0.0452876	0.068831	0.0672009	0	0.182127	0.00696666	0.0129644	0	0.0741023	0	0.0183975	0	0.0313364	0.10453	0.214851	0.060169	0	0.0667354	0	0	0	0	0.516542	0.862231	High-fibrotic
TCGA-AR-A2LM	0.0308823	0	0.0631159	0.100173	0	0.225007	0	0.0267917	0	0	0	0.0355136	0.0310889	0.0158841	0.0736309	0.153336	0.03292	0.00338225	0.207344	0	0	0.000931296	0	0.358867	0.933703	High-fibrotic
TCGA-E2-A150	0.0152793	0.0359824	0.00169675	0.0583886	0	0.200988	0	0.0638685	0	0	0	0	0.0223537	0.218751	0.173349	0.0695534	0.134028	0.00212133	0	0.00364	0	0	0	0.492401	0.869617	High-fibrotic
TCGA-AO-A0JF	0.00227894	0.0279013	0.000727562	0.119377	0	0.198438	0	0	0	0.0367563	0	0.0126348	0.0305764	0.0518383	0.0481839	0.181253	0.100197	0.0134151	0.176422	0	0	0	0	0.45011	0.893895	High-fibrotic
TCGA-BH-A0BG	0.104314	0.0120595	0.00452397	0.0802664	0	0.222108	0.0857852	0.0191227	0	0.000616123	0	0.0448328	0.0167009	0.0628236	0.0988861	0.105434	0.0353141	0.0690895	0.0381235	0	0	0	0	0.535144	0.851044	High-fibrotic
TCGA-EW-A1PH	0.0671686	0	0.0851313	0.168219	0	0.154476	0.0545824	0.073977	0	0	0	0.0164817	0.000666428	0.085252	0.0790733	0.0832922	0.0505028	0.040307	0.0214907	0	0	0.0193805	0	0.329914	0.948076	High-fibrotic
TCGA-A2-A0T0	0	0	0.0752676	0.121044	0	0.201613	0.00783006	0.013745	0.00287201	0.0255897	0	0.0223293	4.41899e-05	0.157162	0.0913777	0.251488	0	0.0160064	0.0110263	0	0.00260422	0	0	0.410773	0.911672	High-fibrotic
TCGA-AN-A0FS	0.117392	0	0.0811682	0.0612617	0	0.146322	0	0.0540843	0	0	0	0.026617	0	0	0.0287826	0.246388	0.0729936	0.00505776	0.153538	0	0	0.00639549	0	0.266642	0.971182	High-fibrotic
TCGA-AN-A0XV	0.0826097	0	0.0831304	0.0894559	0	0.235104	0.00716098	0.0609128	0	0.031298	0	0.0134286	0	0.029273	0.0816534	0.108426	0.0721559	0.0220271	0.0833646	0	0	0	0	0.430521	0.901835	High-fibrotic
TCGA-AR-A24W	0.0449572	0	0.128807	0.0641206	0	0.292778	0.000967233	0.0242421	0	0.0058611	0	0	0.00733095	0	0.0174745	0.142259	0.11009	0.0256498	0.12688	0.00487589	0.00370545	0	0	0.264237	0.973601	High-fibrotic
TCGA-AN-A0XL	0.0465926	0	0.0766791	0.102297	0	0.197093	0	0.0291852	0	0	0	0.0141601	0.0404589	0	0.0744564	0.212529	0.0759946	0	0.127011	0	0	0.00354416	0	0.293252	0.959745	High-fibrotic
TCGA-D8-A27I	0.0775946	0	0.115204	0.126092	0	0.188879	0	0.0224662	0	0	0	0.0121451	0.0180168	0.00590852	0.0650933	0.144147	0.113252	0.0140305	0.0882397	0	0	0.00893059	0	0.516163	0.863821	High-fibrotic
TCGA-AN-A0FN	0.0434545	0.0111518	0.0638776	0.10216	0	0.184631	0.000408504	0.0723966	0.0147582	0.0698462	0	0.02985	0.0316265	0.0283916	0.0816506	0.109927	0.043512	0.0113288	0.10073	0	0.000299475	0	0	0.542259	0.848534	High-fibrotic
TCGA-A7-A0DA	0	0.0273652	0.0268251	0.0725093	0	0.152795	0	0.0316744	0.0242614	0	0	0.0588235	0.0083049	0.169915	0.0669669	0.244508	0	0.0997925	0	0.0151664	0	0.00109188	0	0.26218	0.982512	High-fibrotic
TCGA-AC-A2BK	0.0789571	0	0.0963267	0.151835	0	0.107702	0.0311159	0.0430093	0	0.0181822	0	0.0577078	0.00579605	0.0595411	0.0929253	0.168641	0.0129521	0	0.0735629	0	0.0017463	0	0	0.144442	1.02641	High-fibrotic
TCGA-EW-A1IW	0.0814074	0	0.0776886	0.111212	0	0.118133	0	0.0865393	0	0.0374305	0	0.0192339	0.000330478	0.0249971	0.06812	0.163316	0.0979721	0.0236901	0.081465	0	0.00846409	0	0	0.42457	0.905022	High-fibrotic
TCGA-AO-A0J4	0.132668	0.0163696	0.0638102	0.0628526	0	0.209696	0.0306944	0.0116802	0.00503835	0	0	0.0462447	0.0111071	0.103705	0.13244	0.0998531	0.0245419	0.0114611	0.0348328	0	0	0.00300547	0	0.584359	0.823311	High-fibrotic
TCGA-E9-A243	0.043577	0.0350278	0.0650281	0.10904	0	0.133317	0.105135	0.0110892	0.0130936	0.0638087	0	0.0115213	0.00810718	0.0865996	0.0872216	0.106288	0.0191185	0.0215497	0.0646583	0	0	0.0158198	0	0.59542	0.825977	High-fibrotic
TCGA-E2-A108	0.0567178	0.0192248	0.0231477	0.197434	0	0.0444737	0.0806171	0.0167757	0.0245914	0.0257305	0	0.0285228	0.0232753	0.0458102	0.0805651	0.14007	0.030545	0.0186654	0.143834	0	0	0	0	0.606044	0.821605	High-fibrotic
TCGA-E2-A1LS	0.11603	0	0.00764584	0.103257	0	0.226463	0	0.101931	0	0	0.00263777	0	0.0652074	0	0.13302	0.168561	0.00461243	0.0675183	0.00311635	0	0	0	0	0.137211	1.04308	High-fibrotic
TCGA-AC-A2FF	0.0583812	0	0.128274	0.148634	0	0.156992	0.00682254	0.021127	0.025725	0.0100085	0	0.00374042	0.004889	0.00663999	0.0690158	0.122027	0.0990585	0.0197549	0.11891	0	0	0	0	0.546058	0.84892	High-fibrotic
TCGA-A2-A0EO	0.00629947	0.0286159	0.103908	0.0769514	0	0.253554	0	0.0154807	0.00483381	0	0	0.0418626	0.0147213	0.0538508	0.079925	0.12471	0.0456739	0	0.145364	0	0	0.00424977	0	0.447296	0.894875	High-fibrotic
TCGA-A2-A0T7	0.00893022	0	0.0900142	0.121453	0	0.20792	0.00332573	0	0.00289542	0	0	0.0231152	1.38042e-05	0.137696	0.0621896	0.188461	0.0223298	0.0159243	0.113263	0	0	0.00247025	0	0.408663	0.912018	High-fibrotic
TCGA-C8-A26X	0.00536965	0.0479439	0.157315	0.0561307	0	0.109383	0.0847148	0.0349132	0	0	0.0143221	0.0388204	0	0.0813627	0.0898675	0.149812	0.0735276	0.00478657	0.0517315	0	0	0	0	0.633368	0.80692	High-fibrotic
TCGA-BH-A0BL	0.118177	0	0.0480029	0.0482914	0	0.140217	0.0398268	0.0525485	0	0.00523001	0	0.0649049	0.0282562	0.0469917	0.100195	0.125757	0.0756771	0.0407192	0.0652062	0	0	0	0	0.563045	0.841283	High-fibrotic
TCGA-EW-A1J2	0.037924	0	0.0196845	0.101431	0	0.196778	0	0.0513408	0	0.00640908	0	0.0165199	0.0114247	0.105186	0.0711032	0.167531	0.0701248	0.0321378	0.108369	0	0	0.00403652	0	0.421653	0.90621	High-fibrotic
TCGA-BH-A0AZ	0.0406216	0	0.16644	0.0464619	0	0.17993	0.0216262	0	0.0124281	0.0556041	0	0	0	0.137787	0.0870924	0.116581	0.0215313	0	0.113897	0	0	0	0	0.437796	0.898691	High-fibrotic
TCGA-AR-A0TP	0	0.0333423	0.0054248	0.0206677	0	0.0962867	0	0.0293947	0.00697697	0	0	0.0337912	0.0379409	0.276885	0	0.317172	0.023896	0.0645746	0.04842	0	0.00522716	0	0	0.29535	0.974725	High-fibrotic
TCGA-C8-A1HJ	0.062908	0.000858276	0.0696057	0.11555	0	0.117171	0.0665979	0.133069	0	0.0474084	0	0	0.00310917	0.0572459	0.120847	0.130193	0	0.0663244	0.00911197	0	0	0	0	0.39609	0.919008	High-fibrotic
TCGA-E2-A1L8	0.0792082	0	0.107827	0.0833033	0	0.227304	0.00245653	0.0355472	0.00529233	0.0327678	0	0	0	0.0129221	0.0592988	0.0912371	0.171544	0.0545307	0.0367598	0	0	0	0	0.405456	0.913322	High-fibrotic
TCGA-BH-A18G	0	0.00509844	0.00248546	0.146267	0	0.224947	0.0596503	0	0	0	0.047249	0.0201947	0.162477	0.0178092	0.0540309	0.154113	0	0.0837303	0.0219472	0	0	0	0	0.214422	0.999852	High-fibrotic
TCGA-BH-A0WA	0.0267018	0	0.031409	0.036216	0	0.199562	0.0308235	0.0706256	0	0.0320959	0	0.0219191	0.0145197	0.159717	0.128729	0.135922	0.0484465	0.0339274	0.029386	0	0	0	0	0.442503	0.895928	High-fibrotic
TCGA-BH-A1EW	0.0733297	0	0.0546268	0.0857956	0	0.18937	0.0865653	0	0.000426086	0.0575264	0	0	0.0494455	0.0143406	0.0891391	0.121791	0.0201813	0.025711	0.108291	0	0	0.0234608	0	0.44719	0.895459	High-fibrotic
TCGA-E2-A14N	0.0809902	0	0.0153264	0.0659892	0	0.289017	0.0688595	0.0373188	0	0.056016	0	0	0	0.0682982	0.125125	0.108228	0.00280591	0.0740221	0	0.00800384	0	0	0	0.487962	0.872245	High-fibrotic
TCGA-BH-A6R9	0.0284704	0	0.0625492	0.144669	0	0.116769	0.0355202	0	0.0315534	0	0	0.0318028	0.0187897	0.0612946	0.0762567	0.160224	0.118737	0	0.105292	0	0	0.0080721	0	0.538201	0.856411	High-fibrotic
TCGA-EW-A1PG	0.132624	0	0.0959568	0.0657259	0	0.160471	0.0413522	0	0	0	0.0175304	0	0.0512866	0.0274035	0.0455809	0.0919507	0.0884121	0.0651587	0.110275	0	0.00627229	0	0	0.289457	0.960889	High-fibrotic
TCGA-A2-A0YJ	0	0.00281453	0.0776638	0.152989	0	0.110282	0	0.0256731	0	0	0.0142838	0	0.0259801	0.242932	0.0929742	0.125174	0.0996024	0	0	0.0270458	0	0.00258538	0	0.261878	0.9817	High-fibrotic
TCGA-BH-A0BO	0.0342501	0	0.138653	0	0	0.236887	0.0107522	0	0	0	0	0.000858344	0.0802795	0.0134176	0.034875	0.136178	0.0282664	0.0436306	0.092313	0	0.0335578	0.116081	0	0.435028	0.900574	High-fibrotic
TCGA-EW-A2FV	0.0670164	0	0.0808246	0.0955914	0	0.198497	0.0115275	0.0450655	0.00273588	0.0248817	0	0.036979	0.014593	0.0666896	0.0812528	0.136684	0.0643421	0.00865019	0.0646686	0	0	0	0	0.497178	0.871602	High-fibrotic
TCGA-AR-A252	0.068332	0.00985405	0.0786149	0.148861	0	0.105154	0.0917016	0.0242909	0	0.0522676	0	0.00558783	0.0454564	0.041267	0.0664653	0.105691	0.0497753	0.0378211	0.0688597	0	0	0	0	0.624017	0.814882	High-fibrotic
TCGA-AC-A2B8	0.0395471	0	0.0124184	0.128447	0	0.238734	0.00311846	0	0.0159334	0	0	0.0129553	0.0471733	0.0908069	0.0838627	0.133434	0.0371335	0.00909977	0.140373	0	0.00696311	0	0	0.429066	0.902763	High-fibrotic
TCGA-BH-A18M	0.0827749	0	0.109288	0.0919665	0	0.225953	0	0.00271808	0	0.0151493	0	0.0156794	0.0254122	0.00243735	0.0721437	0.156644	0.0236696	0.0260993	0.144356	0	0	0.00570995	0	0.391032	0.919646	High-fibrotic
TCGA-BH-A1FH	0.0911288	0	0.163862	0.0654117	0	0.182434	0	0.00371608	0	0.0243963	0	0.0347946	0.0164534	0	0.0620951	0.179122	0.052981	0.00478022	0.118824	0	0	0	0	0.386046	0.92214	High-fibrotic
TCGA-D8-A1JH	0.109589	0	0.0822657	0.0741264	0	0.198361	0.0104976	0.0201863	0	0	0	0.03257	0.0248951	0.00711283	0.0541069	0.154993	0.111635	0.0104997	0.105424	0	0	0.00373857	0	0.449816	0.894616	High-fibrotic
TCGA-BH-A0DI	0.011678	0.0438703	0.0634484	0.0798478	0	0.217077	0	0	0.0142635	0	0	0.0643023	0.0089123	0.0957349	0.0777367	0.162067	0.0598545	0	0.101208	0	0	0	0	0.477741	0.881201	High-fibrotic
TCGA-A2-A0YE	0.0440421	0	0.195099	0.0447576	0	0.133852	0	0.0882482	0	0.019929	0	0.0431119	0.00381092	0.0918761	0.124342	0.149029	0.0117385	0.0111885	0.0389749	0	0	0	0	0.333682	0.949158	High-fibrotic
TCGA-D8-A27H	0.0534637	0	0.0866029	0.0456449	0	0.256899	0	0.00931156	0.0113739	0	0	0.028395	0.0121419	0.0974125	0.0893847	0.201952	0.0223817	0.00133621	0.0836998	0	0	0	0	0.29448	0.961356	High-fibrotic
TCGA-BH-A1F6	0.067303	0	0.0910338	0.180811	0	0.126361	0.00480409	0.0255979	0	0	0	0.0456163	0.0570647	0.111668	0.0970832	0.151089	0	0.0415681	0	0	0	0	0	0.497064	0.868834	High-fibrotic
TCGA-A1-A0SD	0.0726492	0	0.0795872	0.053857	0	0.209402	0	0.0575627	0.0113443	0.0102377	0	0.0256206	0.00615928	0.0271249	0.087612	0.159228	0.0562573	0.0349397	0.105109	0	0	0.00330954	0	0.390903	0.919601	High-fibrotic
TCGA-AR-A24T	0.0458141	0	0.0888811	0.0764567	0	0.226001	0	0	0	0.000290824	0	0	0.0679931	0.0171371	0.0744802	0.195279	0.0201543	0.000251847	0.187261	0	0	0	0	0.382041	0.923553	High-fibrotic
TCGA-A7-A0CG	0.0839599	0	0.110534	0.101381	0	0.223023	0.0125909	0.0393126	0	0.0128312	0	0.0152346	0.0153678	0.0194963	0.0672525	0.120068	0.053846	0.0058058	0.119297	0	0	0	0	0.542609	0.849764	High-fibrotic
TCGA-A8-A08H	0.0590089	0	0.0036472	0.095066	0	0.130113	0.0419216	0	0.0181242	0	0.0180173	0	0.0516422	0.102564	0.0446714	0.214214	0.0685129	0	0.0928707	0	0.0168703	0.042756	0	0.583022	0.835543	High-fibrotic
TCGA-EW-A1OW	0.0355657	0	0.107737	0.0619076	0	0.19797	0.0069337	0.0536077	0	0.00652546	0	0.00706215	0.00851893	0.106787	0.122322	0.118758	0.140425	0.0195299	0.00634912	0	0	0	0	0.427566	0.903145	High-fibrotic
TCGA-BH-A0BP	0.00652239	0.00909718	0.0812694	0.0791731	0	0.142623	0	0.0204977	0.0248672	0.0268019	0	0.00316302	0.00703294	0.147244	0.0973628	0.210075	0.0437831	0	0.0849686	0	0	0.0155191	0	0.365546	0.93108	High-fibrotic
TCGA-D8-A1X8	0	0.0109347	0.0682116	0.0748062	0	0.27119	0	0	0	0.00781805	0	0.0146627	0.045171	0	0.0791705	0.174408	0.139388	0	0.0907762	0	0.00938536	0.0140767	0	0.395161	0.917916	High-fibrotic
TCGA-B6-A0IH	0.01115	0.0419353	0.102334	0.190805	0	0.164621	0	0	0	0	0	0.062839	0.0454575	0.0354352	0.101984	0.145523	0.0087708	0	0.0891453	0	0	0	0	0.452199	0.891362	High-fibrotic
TCGA-AR-A256	0.0429729	0	0	0.0470761	0	0.222856	0	0.051374	0.034235	0	0.0109019	0	0.0741633	0.089285	0.0677626	0.096672	0.168407	0.0861176	0	0.00817632	0	0	0	0.394359	0.918497	High-fibrotic
TCGA-AR-A2LR	0.0165098	0	0.0420028	0.111311	0	0.0718571	0	0.037584	0	0.0307149	0	0.0485343	0.0377549	0.0712261	0.0863569	0.236057	0.00854931	0.0111774	0.1088	0	0.0770836	0.00448035	0	0.300213	0.958017	High-fibrotic
TCGA-A1-A0SJ	0.0797014	0	0.135914	0.0893084	0	0.260742	0	0	0	0.0186456	0	0	0	0.0385558	0.0731728	0.139348	0.0604339	0	0.0884242	0	0	0.0157533	0	0.385216	0.922496	High-fibrotic
TCGA-A7-A13G	0.0745434	0	0.00598404	0	0	0.245157	0	0	0	0	1.25524e-05	0.0426435	0.0407987	0	0.0521969	0.385906	0	0	0.152758	0	0	0	0	0.265233	0.97475	High-fibrotic
TCGA-D8-A1JU	0.039839	0	0.0400433	0.150617	0	0.158061	0.0181752	0.0112343	0.00684779	0	0	0.0231827	0.0136318	0	0.0597121	0.222009	0.114313	0	0.141041	0	0	0.00129272	0	0.415827	0.909165	High-fibrotic
TCGA-E9-A1NE	0.079077	0	0.0543188	0.186969	0	0.158148	0.0858643	0.016333	0.00663074	0.0126616	0	0.0358581	0.0289426	0.0181472	0.0884535	0.13052	0	0.0225417	0.0755339	0	0	0	0	0.59662	0.819333	High-fibrotic
TCGA-A8-A07O	0.0310579	0	0.0693105	0.209833	0	0.134193	0.00172644	0.0013208	0.0156044	0	0	0.0425695	0.0253411	0.206113	0.0611887	0.102235	0.00136791	0.0621086	0	0.0253647	0	0.0106656	0	0.428304	0.903001	High-fibrotic
TCGA-BH-A0C3	0.0772212	0	0.0466331	0.0508653	0	0.202877	0.0351883	0	0.0224129	0.0144924	0	0.0258559	0.0393411	0.0390362	0.0965543	0.13679	0.0684753	0	0.144257	0	0	0	0	0.520457	0.863984	High-fibrotic
TCGA-GM-A2DF	0.0127157	0.0574781	0.145349	0.124241	0	0.103292	0	0.0502881	0.0273949	0	0	0.0433818	0.0334382	0.07252	0.0848241	0.154012	0.0429109	0.021923	0	0	0.026231	0	0	0.578729	0.829081	High-fibrotic
TCGA-BH-A0B2	0.0948995	0	0.0422296	0.149457	0	0.147055	0.0286235	0.0163544	0.0326498	0	0	0.0352588	0.0440159	0.0595844	0.0806567	0.156016	0	0.0150364	0.0981629	0	0	0	0	0.528439	0.856916	High-fibrotic
TCGA-A8-A08R	0	0.104109	0.077953	0.0644523	0	0.0449885	0.116552	0.0151302	0.00892141	0.0242165	0	0.0420545	0.0148795	0.135774	0.135923	0.160664	0.0180996	0.00413393	0.0321491	0	0	0	0	0.602048	0.817088	High-fibrotic
TCGA-D8-A142	0.0340416	0.0226327	0.230424	0.106545	0	0.12872	0	0.0547852	0.00776715	0	0	0.0121941	0.0130898	0.0854366	0.080098	0.123632	0.064201	0	0.0364318	0	0	0	0	0.510734	0.860976	High-fibrotic
TCGA-A8-A0A6	0.0364382	0.00585431	0.108048	0.169877	0	0.105454	0.0492126	0.0333169	0.0086397	0.0152551	0	0.0373723	0.0119164	0.0685078	0.0825532	0.124445	0.0528559	0	0.0857153	0	0	0.00453719	0	0.555199	0.844635	High-fibrotic
TCGA-C8-A27B	0.000691243	0	0.0844672	0.138759	0	0.163864	0.0691769	0.0502982	0.00882126	0	0.00770839	0	0.037019	0.0971322	0.0863533	0.08619	0.0710967	0.0622344	0	0	0	0.0361886	0	0.516958	0.861113	High-fibrotic
TCGA-BH-A0HF	0.000615646	0.0590478	0.0742142	0.0230653	0	0.22775	0	0	0	0.00312485	0	0.0371145	0.0257321	0.116441	0.0929158	0.158057	0.0837092	0	0.0961806	0	0	0.00203261	0	0.503373	0.870592	High-fibrotic
TCGA-BH-A0HQ	0.0502141	0	0.095789	0.0399319	0	0.131048	0	0	0.00233076	0.00388571	0	0	0.00884787	0.239458	0.0315524	0.151998	0.0123244	0	0.23262	0	0	0	0	0.427385	0.904033	High-fibrotic
TCGA-BH-A0W4	0.0838588	0	0.0501416	0.0630978	0	0.164702	0	0.0398538	0	0	0	0.031731	0	0.113052	0.0805231	0.118641	0.0955012	0	0.158898	0	0	0	0	0.271645	0.968786	High-fibrotic
TCGA-A2-A0EW	0.0189217	0.0763322	0.0582417	0.0832647	0	0.199436	0	0.0771471	0	0	0	0.0518406	0.0217686	0.0455861	0.0679694	0.131503	0.0331759	0.00444118	0.117237	0	0.0131347	0	0	0.408398	0.912024	High-fibrotic
TCGA-GM-A2DK	0.0596848	0	0.0779023	0.117207	0	0.132321	0.0141854	0.0363575	0.00421348	0.0337694	0	0.0257675	0.00693458	0.0794918	0.0513486	0.194675	0.0849935	0.0104254	0.0575789	0	0.00241525	0.0107288	0	0.462974	0.888346	High-fibrotic
TCGA-BH-A0HP	0.00421991	0	0.071244	0.0280972	0	0.272209	0	0.0185316	0.0433148	0.00767158	0	0.0296608	0.0798551	0.0049941	0.104657	0.160195	0.0552659	0	0.120084	0	0	0	0	0.353394	0.935764	High-fibrotic
TCGA-AC-A6IX	0.0194416	0.0309415	0.138081	0.15849	0	0.100667	0	0	0	0.0603544	0	0.0388297	0.0283044	0.0498694	0.0661761	0.148799	0.035339	0.00415898	0.110648	0	0.00989973	0	0	0.445087	0.895397	High-fibrotic
TCGA-A2-A0YD	0.057639	0	0.0517452	0.0822576	0	0.192795	0	0.0198905	0.0175551	0.0440504	0	0.0337128	0.0140045	0.0429795	0.07691	0.162196	0.0568671	0	0.0995125	0	0.0172865	0.0305983	0	0.417545	0.908129	High-fibrotic
TCGA-A2-A0T6	0.0732102	0.00694724	0.0472077	0.120042	0	0.184414	0.0054458	0.0533983	0.000578684	0.0202955	0	0.0154854	0.00704452	0.0115199	0.0646175	0.154633	0.0596205	0.00529476	0.134162	0	0.0273427	0.0087405	0	0.485044	0.878368	High-fibrotic
TCGA-A7-A5ZW	0.0454708	0	0.0542108	0.148507	0	0.129087	0	0	0.0277428	0	0	0.0364001	0.0169695	0.066811	0.0599329	0.144865	0.0799442	0	0.190059	0	0	0	0	0.424777	0.905223	High-fibrotic
TCGA-A2-A0CL	0.127385	0	0.0516909	0.132488	0	0.133927	0.0408264	0.0452816	0.00427625	0.0248281	0	0.0400276	0.0371108	0.05269	0.0864179	0.116016	0	0.0443422	0.0626926	0	0	0	0	0.631847	0.802448	High-fibrotic
TCGA-B6-A0RU	0.0314752	0	0.0698835	0.0554746	0	0.212125	0	0.0280877	0.00269785	0.0390077	0	0.0299021	0	0.10736	0.104351	0.156535	0.110609	0	0.0524917	0	0	0	0	0.3585	0.934072	High-fibrotic
TCGA-AR-A1AO	0.048562	0	0.0286707	0.154039	0	0.084081	0.0247889	0.0319496	0.0180282	0.0132527	0	0.0210404	0.0297396	0.158337	0.0588399	0.159245	0.0736419	0.0218401	0.0684366	0	0	0.00550676	0	0.639405	0.804262	High-fibrotic
TCGA-PL-A8LZ	0.100919	0	0.0473042	0.0655347	0	0.0884527	0.0483917	0.0888013	0	0.030094	0	0.0685027	0.011565	0.06399	0.109903	0.146374	0	0.0724998	0.0576688	0	0	0	0	0.568897	0.833868	High-fibrotic
TCGA-D8-A27L	0.0710024	0	0.0789236	0.0785888	0	0.209359	0	0.0286608	0.0302606	0	0	0.0344116	0.031468	0.0272975	0.0643357	0.139786	0.0667761	0.0115642	0.127388	0	0	0.000176824	0	0.45897	0.890308	High-fibrotic
TCGA-A2-A0D2	0.0868877	0	0.0318731	0.131872	0	0.107045	0.0336078	0.015903	0	0.0131063	0	0.0590468	0.00334833	0.123748	0.0853725	0.150063	0.0310266	0.0526839	0.0744159	0	0	0	0	0.523921	0.858117	High-fibrotic
TCGA-AN-A0FX	0.0233836	0.00962372	0.0690832	0.159236	0	0.0779186	0	0.0557244	0.00795455	0	0	0.0356942	0.00381422	0.182136	0.127229	0.181091	0.019464	0	0.0476474	0	0	0	0	0.359946	0.935747	High-fibrotic
TCGA-A1-A0SP	0.0223154	0.00615718	0.113534	0.124595	0	0.1977	0.0151771	0	0.00176372	0	0	0.0242857	0.0283831	0.0737649	0.0501788	0.109661	0.156996	0.0575552	0	0.0179334	0	0	0	0.516275	0.862887	High-fibrotic
TCGA-BH-A0DG	0.124643	0	0.0545253	0.0887845	0	0.181099	0.00115309	0.0130849	0	0	0	0.0145957	0.027101	0.0982252	0.0933448	0.177309	0.0191775	0	0.106957	0	0	0	0	0.509004	0.866247	High-fibrotic
TCGA-A2-A0CP	0.00383036	0.0101556	0.152067	0.0409679	0	0.219189	0	0	0.000602658	0.0209702	0	0.0443322	0.00132115	0.076163	0.0605115	0.135676	0.0137637	0	0.22045	0	0	0	0	0.402664	0.914797	High-fibrotic
TCGA-E2-A1IJ	0.029284	0	0.0929681	0.13544	0	0.160838	0	0.0592907	0.0302747	0	0	0.0381434	0.0442992	0.0223619	0.0739706	0.11973	0.0461419	0.0142078	0.13041	0	0	0.00263977	0	0.479133	0.880267	High-fibrotic
TCGA-OL-A66J	0.0635408	0	0.0584381	0.119318	0	0.138652	0.00435528	0.0374596	0	0.00695958	0	0.0220663	0.0011373	0.109513	0.0606166	0.149688	0.132941	0	0.0743958	0	0	0.0209169	0	0.362345	0.931683	High-fibrotic
TCGA-4H-AAAK	0.0775206	0	0.0765863	0.0731995	0	0.172872	0	0.0557022	0.0071768	0.00641338	0	0.038182	0.0606625	0.0417799	0.0526838	0.140845	0.0123559	0.0306991	0.153321	0	0	0	0	0.384941	0.922159	High-fibrotic
TCGA-A7-A6VV	0.0459511	0	0.0879098	0.0546423	0	0.178985	0.00663858	0.0454421	0.0386055	0	0	0.0185628	0.0192894	0.127399	0.0988807	0.16265	0.0562794	0	0.042475	0	0	0.0162898	0	0.494133	0.87278	High-fibrotic
TCGA-E9-A1NC	0.040542	0	0.136644	0.148147	0	0.0813357	0.0559274	0.0512917	0.0230779	0.0201659	0	0.0278033	0.049373	0.0590038	0.106718	0.113793	0.0391206	0	0.0470562	0	0	0	0	0.589022	0.825747	High-fibrotic
TCGA-BH-A0DP	0.0445913	0	0.11391	0.154359	0	0.181844	0	0.039208	0	0	0	0.0258193	0.0337838	0.0513979	0.0656792	0.153468	0.0187052	0	0.116637	0	0	0.000597812	0	0.424674	0.904717	High-fibrotic
TCGA-OL-A6VQ	0.131653	0	0.075957	0.0845721	0	0.227745	0.00594605	0.0153702	0	0.000162651	0	0.0155475	0.0120567	0	0.0657499	0.0951364	0.109517	0.0386091	0.119413	0.000501127	0	0.00206443	0	0.404987	0.913494	High-fibrotic
TCGA-AC-A2QI	0.0410039	0.0783429	0.0597298	0.0918964	0	0.178473	0.00915428	0	0.0187673	0.0299842	0	0.0309043	0	0.0954681	0.111191	0.190395	0.00678959	0	0.0579001	0	0	0	0	0.444015	0.895392	High-fibrotic
TCGA-AC-A3HN	0.0578162	0.0319835	0.0888724	0.132324	0	0.0694884	0.00164665	0.0158419	0.0039185	0	0	0.051791	0.0324323	0.126223	0.0647287	0.142579	0.0293247	0	0.15103	0	0	0	0	0.51176	0.866117	High-fibrotic
TCGA-3C-AALK	0.0127849	0	0.130391	0.119686	0	0.170308	0	0.0460859	0.0457525	0	0	0.0292455	0.0283872	0	0.0679176	0.124384	0.0838206	0.0196995	0.121537	0	0	0	0	0.426074	0.904232	High-fibrotic
TCGA-XX-A89A	0.00927927	0	0.149191	0.0903108	0	0.167029	0.00586126	0.0356613	0.0132953	0	0	0.0557175	0.0310337	0.0387601	0.0825232	0.16837	0.0587224	0.0116969	0.0759396	0	0	0.00660901	0	0.507167	0.867496	High-fibrotic
TCGA-AC-A6IV	0.0109751	0.0106305	0.0860148	0.109081	0	0.242862	0	0	0.0116175	0	0	0.0431781	0	0.0444572	0.0758052	0.165481	0.0237656	0	0.130477	0	0	0.045655	0	0.524332	0.859174	High-fibrotic
TCGA-AO-A0JJ	0.0383249	0.0631756	0.109356	0.102953	0	0.107819	0.0260277	0.0646573	0	0.0627487	0	0.021523	0.0309204	0.0165319	0.0705066	0.164922	0.0126635	0	0.107871	0	0	0	0	0.505376	0.867829	High-fibrotic
TCGA-BH-A0DK	0.0215541	0.0679968	0.0859453	0.176072	0	0.119851	0.0122629	0	0.058348	0.0111701	0	0.0170577	0.0334401	0.0192827	0.100229	0.125759	0.0275811	0.0295408	0.0939105	0	0	0	0	0.6058	0.816943	High-fibrotic
TCGA-B6-A0I6	0.0970515	0	0.0619813	0.104891	0	0.176625	0	0.0382215	0.0481003	0	0	0.0377038	0.0439085	0.077665	0.0548727	0.143418	0.0783514	0.00139265	0.0332383	0	0	0.00257985	0	0.266651	0.973061	High-fibrotic
TCGA-A2-A0SY	0.151139	0	0.0633437	0.0499948	0	0.185851	0.00686532	0.0383057	0	5.19021e-05	0	0.0302359	0.0415424	0.0697248	0.0701788	0.0927769	0.0446389	0	0.155351	0	0	0	0	0.53436	0.855451	High-fibrotic
TCGA-AO-A12F	0.0851391	0	0.0767585	0.0619251	0	0.17079	0	0.0243409	0	0	0	0.0135832	0.0182324	0.0810013	0	0.256924	0.0312494	0.0761747	0.0839192	0	0.00108658	0.0188749	0	0.231797	0.985191	High-fibrotic
TCGA-A2-A25A	0.0404665	0	0.0839197	0.126204	0	0.233353	0	0.0329852	0	0	0	0.0261371	0.0182492	0	0.0967533	0.14923	0.0759669	0	0.116238	0	0	0.000498002	0	0.457746	0.889528	High-fibrotic
TCGA-GM-A2DI	0.108322	0	0.0434772	0.144133	0	0.19263	0.0312286	0	0.0316066	0	0	0.0405475	0.0211211	0.0395008	0.0883774	0.130062	0.0292078	0.0146345	0.0851524	0	0	0	0	0.625456	0.8065	High-fibrotic
TCGA-A7-A4SD	0.00588501	0.0481795	0.169189	0.108682	0	0.0989303	0.0312222	0.0653387	0.00834862	0	0	0.0715706	0.00713138	0.039497	0.099225	0.11297	0	0.0602419	0.0695785	0	0	0.00401	0	0.526681	0.853646	High-fibrotic
TCGA-HN-A2OB	0.117624	0	0.0868733	0.130001	0	0.150987	0	0.0126487	0.00369381	0	0	0.0130253	0.0109425	0.0176058	0.0586652	0.146022	0.092584	0	0.159327	0	0	0	0	0.338691	0.941876	High-fibrotic
TCGA-LD-A9QF	0.0122001	0.0674597	0.0591204	0.182336	0	0.0655917	0.0276009	0.0571418	0.0388003	0	0	0.0307172	0.0244529	0.143222	0.0803242	0.0960834	0.043153	0.0249914	0.0468047	0	0	0	0	0.638177	0.801257	High-fibrotic
TCGA-B6-A400	0	0.0502497	0.0269783	0.0635082	0	0.0966694	0	0.00801405	0.0432122	0.0370164	0	0.0379583	0	0.140904	0.040476	0.146051	0.156102	0.150312	0.00254927	0	0	0	0	0.535477	0.849819	High-fibrotic
TCGA-AC-A23G	0.0301837	0	0.0420868	0.168815	0	0.0652235	0	0.0520517	0.00699516	0	0	0.0528483	0.0268464	0.0945451	0.062124	0.175977	0.1184	0.0092618	0.0843761	0	0	0.0102658	0	0.434274	0.900824	High-fibrotic
TCGA-GM-A2DA	0.0912775	0	0.125586	0.172938	0	0.174957	0	0.0539217	0.0103335	0.0293697	0	0.0322537	0	0.00916402	0.0877895	0.0995665	0.0139156	0.00239596	0.088777	0	0.00775441	0	0	0.534281	0.84797	High-fibrotic
TCGA-A7-A3IY	0.00170227	0.000222278	0.00691142	0.00219104	0	0.164858	0.00960557	0.00317193	0.000786263	0.0216882	0	0.0223164	0.0544896	0.171276	0.100976	0.230352	0.0871238	0	0	0.112838	0.000130257	0.00936173	0	0.507291	0.862157	High-fibrotic
TCGA-A2-A0CV	0.0907087	0	0.0809447	0.168896	0	0.150192	0	0.0602019	0.0161593	0.0195258	0	0.0209312	0.0357544	0.00501028	0.0780067	0.135092	0.0691587	0.0124715	0.041668	0	0.00475824	0.0105205	0	0.404852	0.913663	High-fibrotic
TCGA-A2-A0T4	0.0257975	0	0.0729076	0.161306	0	0.0853108	0	0.0634219	0	0	0	0.0584989	0.0243119	0.0560592	0.083536	0.150575	0.0335484	0.0130876	0.169071	0	0	0.00256839	0	0.500178	0.870707	High-fibrotic
TCGA-BH-A0BJ	0.0203726	0	0.153512	0.0473764	0	0.261819	0.00380313	0	0.00847447	0.0283906	0	0.0107116	0.017399	0.144808	0.0817711	0.111143	0.0370579	0	0.0733609	0	0	0	0	0.45739	0.889594	High-fibrotic
TCGA-S3-AA14	0.0996427	0	0.113494	0.103105	0	0.167581	0	0.0578551	0	0	0	0.0156274	0.0295394	0.00722637	0.0628589	0.150585	0.0407132	0.0192437	0.132528	0	0	0	0	0.319842	0.950334	High-fibrotic
TCGA-A2-A0CZ	0.010944	0.0235433	0.11877	0.0999078	0	0.181958	0	0.00047226	0	0.0165833	0	0.0548924	0.0164728	0.133454	0.0733666	0.111191	0.023067	0	0.135377	0	0	0	0	0.561949	0.841105	High-fibrotic
TCGA-EW-A1IX	0.0242913	0.0302421	0.088315	0.042661	0	0.183851	0.00623676	0	0.0166324	0.0138284	0	0.031445	0.00437068	0.0245077	0.040554	0.22931	0.0704518	0	0.153791	0.00703491	0.0324774	0	0	0.378267	0.92513	High-fibrotic
TCGA-AR-A2LN	0.0903649	0	0.109636	0.135614	0	0.142372	0	0.032587	0	0	0	0.0372584	0.0632773	0	0.0525333	0.164235	0.0350788	0.012815	0.123926	0	0	0.000301879	0	0.405611	0.913258	High-fibrotic
TCGA-A2-A0EP	0.115994	0	0.0218387	0.112586	0	0.110195	0.0225438	0.0865231	0.0235494	0	0	0.0364534	0.0310103	0.069614	0.0644347	0.109124	0.10645	0.0178129	0.0564492	0	0.0154212	0	0	0.649046	0.80165	High-fibrotic
TCGA-AR-A5QN	0.0836111	0	0.0520288	0.114348	0	0.238619	0	0.0126587	0.00166843	0.0293315	0	0.00271808	0	0.0212887	0.090481	0.176299	0.0221825	0.014495	0.128426	0	0	0.0118434	0	0.348887	0.938456	High-fibrotic
TCGA-BH-A0DT	0.0822048	0	0.0560634	0.104809	0	0.193257	0.0089642	0.0376825	0.0319433	0	0	0.0146561	0.0256212	0.0350482	0.0914102	0.0777862	0.135684	0.02287	0.082	0	0	0	0	0.445689	0.895482	High-fibrotic
TCGA-A2-A0YL	0.0760079	0	0.0822379	0.130821	0	0.186313	0	0.0172741	0	0.00542445	0	0.0375533	0.00769375	0.0135002	0.0955029	0.164319	0.0724663	0	0.110886	0	0	0	0	0.418728	0.907326	High-fibrotic
TCGA-AR-A5QQ	0.0936776	0.00361746	0.108536	0.059697	0	0.0911354	0.054073	0.00047692	0.0379615	0.0488189	0	0.0203029	0	0.0485765	0.0676948	0.17702	0.09978	0.0532856	0.00815266	0	0	0.0271933	0	0.636288	0.805377	High-fibrotic
TCGA-EW-A1P7	0.132376	0.0221436	0.0509068	0.133326	0	0.160357	0.0483167	0.0374338	0.0140762	0.0226408	0	0.0257039	0.0165089	0.0492808	0.0793009	0.09654	0.0475445	0.017359	0.0461847	0	0	0	0	0.617241	0.809181	High-fibrotic
TCGA-BH-A8FZ	0.0637407	0	0.0745636	0.0985785	0	0.0912768	0.0546838	0.0236178	0.0185225	0.00986761	0	0.0118427	0.0104623	0.0547463	0.0435414	0.142764	0.0960823	0.0411507	0.121127	0	0.0377365	0.00569522	0	0.5504	0.855366	High-fibrotic
TCGA-EW-A6SC	0.0991265	0	0.113872	0.0152713	0	0.205636	0.00661826	0.0697612	0	0.0130787	0	0	0.0137398	0	0.0614017	0.15849	0.126114	0.0126537	0.0290528	0.0515083	0.00596971	0.0177058	0	0.432402	0.901536	High-fibrotic
TCGA-EW-A1P8	0.0162456	0	0.0685472	0.131951	0	0.12977	0	0.0478193	0.0362812	0	0	0	0.0406322	0.00103103	0.0723274	0.20412	0.173904	0.0138645	0	0.0472992	0.0032507	0.0129562	0	0.472685	0.883419	High-fibrotic
TCGA-GM-A2DD	0.0504488	0	0.0446302	0.104067	0	0.14589	0.0537812	0.0444242	0.00152218	0.023862	0	0.0334377	0.0375653	0.065246	0.0909238	0.135645	0.0670909	0.0266354	0.0664156	0	0.00841542	0	0	0.614631	0.818625	High-fibrotic
TCGA-A2-A0T5	0.0126337	0.0343968	0.0340928	0.0736195	0	0.154091	0	0.049745	0.0491442	0	0.0204853	0	0.0353561	0.0972149	0.0917052	0.228658	0.0582095	0.026303	0.0343444	0	0	0	0	0.271179	0.971885	High-fibrotic
TCGA-A1-A0SB	0.100786	0	0.0284775	0.139835	0	0.150533	0	0.0211119	0	0	0	0.0307509	0.123684	0.062292	0	0.18778	0	0.0809569	0.0737935	0	0	0	0.72	0.0295079	1.06263	High-fibrotic
TCGA-JL-A3YW	0.0251487	0.0161594	0.0341664	0.056342	0	0.114631	0.0153921	0.0388642	0.0336057	0.0300779	0	0.0630451	0.0224656	0.147839	0.109834	0.191782	0.0459126	0.00440571	0.0503301	0	0	0	0	0.532284	0.852753	High-fibrotic
TCGA-AC-A2FO	0.0890343	0	0.0851619	0.0485614	0	0.329965	0	0	0	0	0	0.0459057	0.045681	0.051626	0.0884858	0.089594	0.0330139	0	0.0845319	0	0.00843948	0	0	0.549546	0.845	High-fibrotic
TCGA-AC-A3W6	0.0272516	0.0282299	0.039125	0.184392	0	0.112475	0.0372706	0	0.0179716	0.0292046	0	0.0249469	0.00413596	0.0352606	0.0927929	0.180138	0.0141274	0	0.172678	0	0	0	0	0.491765	0.87365	High-fibrotic
TCGA-A1-A0SE	0.0361383	0	0.142368	0.114366	0	0.217327	0	0	0.0277227	0.0164822	0	0.030591	0.0094031	0.0162129	0.07138	0.129015	0.060331	0	0.128662	0	0	0	0	0.365236	0.931289	High-fibrotic
TCGA-A2-A04P	0.076662	0.0655932	0.0868199	0.110966	0	0.185477	0.00470435	0.0833748	0.00561559	0	0	0.0199082	0.00983598	0.0251351	0.100947	0.123192	0.0262717	0.0553737	0.0192624	0	0.000861871	0	0	0.527828	0.852189	High-fibrotic
TCGA-S3-AA10	0	0.111004	0.0711788	0.154654	0	0.0136848	0.0790206	0.128639	0	0.0158993	0	0.0601197	0.0144574	0.0641616	0.0975936	0.118657	0.0124025	0.0390277	0.0122437	0	0.00725584	0	0	0.617665	0.806669	High-fibrotic
TCGA-BH-A0B0	0.0420623	0.010009	0.0366104	0.0797731	0	0.174569	0.0111761	0.0314044	0.0516649	0	0	0.0213673	0.0347915	0.0546358	0.0800453	0.129075	0.0816427	0.0382698	0.122904	0	0	0	0	0.494918	0.874846	High-fibrotic
TCGA-E2-A3DX	0.0950409	0.0419068	0.0659685	0.160472	0	0.203159	0	0.0165563	0	0	0	0.0196756	0.0515048	0.0301418	0.0628994	0.160184	0.00954253	0.00896644	0.0739824	0	0	0	0	0.564916	0.837026	High-fibrotic
TCGA-AO-A0J9	0.0670961	0	0.0387905	0.140546	0	0.141741	0.0183495	0.0289604	0.056202	0.00876367	0	0.0161779	0.0241386	0.11256	0.0605155	0.159772	0.0661283	0	0.0602589	0	0	0	0	0.516092	0.863083	High-fibrotic
TCGA-BH-A0B4	0.0141715	0.0156183	0.0600402	0.15771	0	0.157909	0	0.00185002	0	0.0172321	0	0.0382123	0.0149577	0.070708	0.104374	0.165541	0.0205135	0	0.161162	0	0	0	0	0.47249	0.882505	High-fibrotic
TCGA-A2-A4RW	0.0474498	0	0.0734927	0.101264	0	0.153641	0	0	0.0335687	0	0	0.048951	0.0181495	0.0221447	0.0817212	0.134202	0.0558994	0	0.229516	0	0	0	0	0.434414	0.900509	High-fibrotic
TCGA-E2-A15E	0.115312	0	0.0983078	0.10484	0	0.116268	0	0.0302025	0.00377062	0	0	0.0448865	0.0262891	0.0600079	0.0711072	0.139976	0.0452361	0.00509326	0.138703	0	0	0	0	0.241102	0.98231	High-fibrotic
TCGA-E9-A295	0.0341212	0	0.0513926	0.140049	0	0.133912	0.00721472	0.0186126	0.0398996	0.00220321	0	0.0269019	0.00120161	0.0113803	0.0983311	0.141131	0.153762	0	0.139888	0	0	0	0	0.346141	0.93862	High-fibrotic
TCGA-A2-A4RX	0.0964323	0.0612283	0.110052	0.0940943	0	0.220351	0.00377937	0	0.00954269	0	0	0	0.0120642	0.0785864	0.0940551	0.162005	0.0517506	0.00401701	0.00204087	0	0	0	0	0.528309	0.852493	High-fibrotic
TCGA-LL-A440	0.0639091	0	0.0284013	0.0422837	0	0.158661	0	0.0393233	0.0298568	0	0.0061693	0.00270396	0.0399883	0.122354	0.0391943	0.195541	0.105067	0.0202013	0.102758	0	0	0.00358817	0	0.542007	0.854082	High-fibrotic
TCGA-BH-A0DE	0.00224173	0.0226013	0.0529038	0.0638547	0	0.228656	0.030937	0	0	0.0704149	0	0	0	0.048707	0.104002	0.264999	0.0359682	0.0252058	0.0291695	0	0.0180707	0.00226901	0	0.42804	0.902961	High-fibrotic
TCGA-BH-A0W7	0.100191	0	0.0698105	0.11357	0	0.171985	0.000782037	0	0.0213992	0.00283287	0	0.0582424	0.0163602	0.0899124	0.0869521	0.105169	0.0157885	0.0176347	0.12937	0	0	0	0	0.579627	0.831152	High-fibrotic
TCGA-BH-A18F	0.0842421	0	0.0907939	0.127196	0	0.138051	0.00859584	0.0444104	0.00990021	0.0166586	0	0.045266	0.0138553	0.0582947	0.0765609	0.0902313	0.0730169	0.00769445	0.115232	0	0	0	0	0.474933	0.882107	High-fibrotic
TCGA-LL-A5YP	0	0.0375161	0.146477	0.0680073	0	0.12786	0	0.0582169	0	0.0438735	0	0.0391946	0.036392	0.0528436	0.0578424	0.218137	0.027827	0.0507452	0.0188035	0.0043541	0	0.0119097	0	0.489533	0.874829	High-fibrotic
TCGA-BH-A0BQ	0.0819996	0	0.0636886	0.117129	0	0.21378	0.00971744	0.0238534	0	0	0	0.0233816	0.0228918	0.0611938	0.0603749	0.12138	0.0146411	0.0671711	0.118798	0	0	0	0	0.463837	0.887251	High-fibrotic
TCGA-B6-A0WY	0.015651	0	0.083491	0.0983498	0	0.079636	0	0.0677445	0.0273707	0.0273595	0	0.048555	0.0058165	0.0776286	0.123226	0.191647	0.0283288	0.0162621	0.108934	0	0	0	0	0.401069	0.915271	High-fibrotic
TCGA-OL-A5D6	0.00214655	0.00155155	0.0698395	0.0553212	0	0.221723	0	0.0265452	0.0227823	0	0	0.0259864	0.054991	0.0332413	0.0761862	0.201763	0.0840028	0.0167252	0.107195	0	0	0	0	0.364847	0.930559	High-fibrotic
TCGA-A7-A4SE	0.0345561	0.00648434	0.0509144	0.0312308	0	0.213725	0.000237133	0.0821336	0	0	0	0.0145871	0	0.159019	0.127841	0.158551	0.0723064	0.0397953	0.00398052	0	0.00463793	0	0	0.440369	0.896982	High-fibrotic
TCGA-AC-A2FE	0	0.0222765	0.0756235	0.231348	0	0.135364	0.0304112	0.0383281	0.0332203	0	0	0.0400901	0.0360582	0.0106295	0.0869829	0.131299	0.0311594	0.0444897	0.049675	0	0	0.00304426	0	0.547496	0.842885	High-fibrotic
TCGA-BH-A28Q	0.0497618	0	0.067221	0.0172599	0	0.350157	0	0.0282889	0	0.0142172	0	0	0.023777	0.0152759	0.0945833	0.161616	0.0771102	0.00329706	0.0974348	0	0	0	0	0.295023	0.961265	High-fibrotic
TCGA-AC-A3YI	0.0573041	0	0.115472	0.0756754	0	0.153502	0.0239516	0	0	0	0.00715665	0	0.0639171	0.097941	0.0661961	0.13034	0.0277529	0.0410608	0.0688876	0.0463274	0	0.024515	0	0.463241	0.88851	High-fibrotic
TCGA-A2-A3XY	0.0884928	0.0145455	0.0801574	0.0873316	0	0.128875	0	0.024109	0.0148019	0	0	0.0556379	0.0304254	0.137292	0.123631	0.10727	0.0253149	0.0453314	0.035706	0	0.00107729	0	0	0.576736	0.828461	High-fibrotic
TCGA-E9-A1R0	0.0423757	0.0439662	0.0989772	0.200023	0	0.13167	0	0.00679282	0.0563185	0	0.0075648	0.000815858	0.0247077	0.0584622	0.0477304	0.129819	0.0251536	0.00929727	0.116326	0	0	0	0	0.46528	0.885996	High-fibrotic
TCGA-B6-A0I9	0	0.0280611	0.196589	0.0929913	0	0.133993	0	0	0	0.0288532	0	0.00502578	0.0285264	0.117299	0.126776	0.143556	0.022567	0	0.0757616	0	0	0	0	0.463953	0.885388	Low-fibrotic
TCGA-BH-A18L	0	0.0140197	0.0971768	0.102442	0	0.0631975	0	0.0311331	0.00129642	0.0413183	0	0.0609755	0.0102765	0.0270858	0.0984023	0.172731	0.0367931	0	0.158652	0	0.0844992	0	0	0.21972	0.990661	Low-fibrotic
TCGA-A7-A3IZ	0	0.00348833	0.0367183	0.0217078	0	0.190981	0	0	0.0158579	0.000783025	0	0.0216122	0	0.0944355	0.022149	0.287752	0.00196901	0	0.297662	0	0	0.00488431	0	0.305293	0.961359	Low-fibrotic
TCGA-AN-A0AK	0	0.0517004	0.130374	0.146489	0	0.0968487	0.00935696	0.0315504	0	0	0	0	0	0.115562	0.125136	0.268619	0.00270519	0	0.0183486	0	0	0.00330956	0	0.465765	0.884256	Low-fibrotic
TCGA-A8-A06Z	0.0024052	0	0.0325794	0.0209851	0	0.152905	0	0	0.0285853	0	0.0229826	0.0028677	0.012133	0.173987	0.0692374	0.354473	0.0403112	0	0.0865478	0	0	0	0	0.290154	0.969853	Low-fibrotic
TCGA-AC-A2FM	0.0642745	0	0.100258	0.160472	0	0.187886	0.00802512	0.00685219	0.0105711	0	0	0.0374274	0.0217507	0.003337	0.0822269	0.1565	0.0234944	0	0.124969	0	0.0119561	0	0	0.202371	1.00104	Low-fibrotic
TCGA-A2-A0SW	0.020048	0.0044477	0.17641	0.183901	0	0.114379	0.0348987	0.027411	0.0345401	0.00279323	0	0.0270238	0.00149339	0.0627979	0.07561	0.133845	0.0323207	0	0.0663371	0	0	0.00174407	0	0.594638	0.820017	Low-fibrotic
TCGA-A7-A0DC	0.0179114	0	0.0527119	0	0	0.269124	0	0	0.00610087	0.013239	0	0.0307305	0	0.164118	0.00423873	0.217387	0.00706487	0.0174273	0.168794	0	0.0175982	0.0135536	0.24	0.0910511	1.04526	Low-fibrotic
TCGA-AO-A0J3	0.0030861	0	0.0563477	0.132749	0	0.149675	0	0	0.0409169	0	0	0.0635161	0.023924	0.0336724	0.0974599	0.223768	0.00665772	0	0.168227	0	0	0	0	0.244701	0.98358	Low-fibrotic
TCGA-AR-A24R	0.0398265	0.0289972	0.0710422	0.0980907	0	0.15865	0.0248814	0	0.013036	0	0	0.0105068	0.0328336	0.0462755	0.128903	0.159139	0.0588676	0.0241194	0.103487	0	0.00134405	0	0	0.470652	0.884115	Low-fibrotic
TCGA-D8-A1X6	0	0.0128037	0.000987211	0.0178338	0	0.199263	0	0.0268241	0	0.0235679	0	0.0369282	0.108996	0.0124209	0.0579923	0.385853	0.0388798	0	0.0745137	0	0	0.00313668	0	0.375066	0.927732	Low-fibrotic
TCGA-A2-A0YF	0	0.0165154	0.0908992	0.066692	0	0.138955	0	0.0232166	0.00538437	0.0142765	0	0	0	0.157498	0.0601574	0.295636	0.0559656	0.0166228	0.056994	0	0.00118648	0	0	0.417401	0.908218	Low-fibrotic
TCGA-B6-A0RM	0.0332149	0	0.0740204	0.0679072	0	0.252272	0	0.0203215	0.0153114	0.00920326	0	0.0151571	0.00421084	0	0.06507	0.117311	0.123325	0	0.202675	0	0	0	0	0.253792	0.977074	Low-fibrotic
TCGA-AR-A0TQ	0.105563	0	0.135467	0.124402	0	0.1449	0.000189108	0.0492978	0	0.040648	0	0.0396842	0.00521894	0.0884593	0.0825376	0.164718	0	0.000949804	0.0179652	0	0	0	0	0.576596	0.826071	Low-fibrotic
TCGA-GM-A2DH	0.0731738	0.0093388	0.0410281	0.154564	0	0.128231	0.0727036	0.0558173	0.0311897	0.00532933	0	0.0404266	0.013903	0.0619456	0.0847139	0.108183	0.0474566	0.0242585	0.0477376	0	0	0	0	0.553442	0.842848	Low-fibrotic
TCGA-E9-A1N3	0.0536355	0	0.184002	0.0709162	0	0.111389	0	0.0497416	0	0	0	0.000140158	0.0352257	0	0.071681	0.245213	0.0742472	0	0.0847167	0	0	0.0190917	0	0.215804	0.995129	Low-fibrotic
TCGA-AR-A2LL	0.0664826	0	0.0838325	0.0429331	0	0.0772719	0.00213144	0.0301571	0.00140261	0.0249699	0	0.0225676	0.00965662	0.199958	0.0498744	0.150766	0.084867	0	0.147631	0	0	0.00549797	0	0.474685	0.882477	Low-fibrotic
TCGA-BH-A0C0	0.0370649	0.00889241	0.0624727	0.168121	0	0.0785354	0.0897392	0.0317311	0.0262538	0	0	0.0239354	0.0425753	0.0687035	0.0822716	0.121361	0.0565396	0.0183066	0.0834974	0	0	0	0	0.604094	0.825466	Low-fibrotic
TCGA-C8-A26Y	0.120616	0	0.0430796	0.102161	0	0.151859	0	0.0957467	0	0.000711489	0	0.0137304	0	0.157791	0.0784683	0.179803	0.0104163	0.0452001	0	0.000417082	0	0	0	0.394559	0.919165	Low-fibrotic
TCGA-A7-A2KD	0.00758232	0.059192	0.0837968	0.0134424	0	0.168665	0.0365234	0	0.0366001	0	0	0.0295731	0.0222343	0.0331095	0.152061	0.206417	0.086963	0.0231487	0.0406913	0	0	0	0	0.48957	0.873666	Low-fibrotic
TCGA-A7-A4SB	0.0675603	0	0.224453	0.126813	0	0.0472237	0	0.0112969	0	0.0376959	0	0.020413	0	0	0.096431	0.199083	0.0154941	0	0.149759	0	0.00377702	0	0	0.274204	0.977695	Low-fibrotic
TCGA-EW-A1J1	0.02285	0.0165024	0.047717	0.0630133	0	0.172933	0.0512447	0.012657	0.00272283	0.0199278	0	0.0373811	0.00564357	0.0579782	0.138311	0.158542	0.0604599	0	0.132116	0	0	0	0	0.454396	0.891205	Low-fibrotic
TCGA-A8-A06Q	0.0428725	0	0.134932	0.0613505	0	0.174376	0	0.0305329	0.00448939	0.00281457	0	0.00849637	0.0148242	0.0217004	0.0892865	0.272871	0.0208284	0	0.120625	0	0	0	0	0.226429	0.98938	Low-fibrotic
TCGA-E2-A14O	0.0595536	0	0.0870138	0.0572328	0	0.119975	0	0.00160297	0.013385	0.0367675	0	0.0661538	0.00804849	0.221785	0.0986589	0.0887305	0.0673574	0	0.0737354	0	0	0	0	0.36133	0.933835	Low-fibrotic
TCGA-AO-A03O	0.0305642	0.00357037	0.093278	0.0403215	0	0.148831	0.0888149	0.00776302	0.000326773	0.0243367	0	0.0263922	0.00329732	0.072993	0.114442	0.230188	0	0.0259741	0.0843561	0	0	0.00455098	0	0.521975	0.860461	Low-fibrotic
TCGA-BH-A1FR	0	0.132616	0.0233939	0.208402	0	0.117036	0.0103485	0.00216656	0	0.0177225	0	0.0100027	0.00572369	0.0821518	0.144498	0.202809	0.0201794	0	0.0229503	0	0	0	0	0.406118	0.914146	Low-fibrotic
TCGA-A8-A07L	0.0361393	0	0.0751623	0.0708733	0	0.144853	0	0.0262852	0.0219485	0	0	0.0423548	0	0.112341	0.0745717	0.223755	0.0298256	0.00875037	0.131521	0	0	0.00161891	0	0.216674	0.992051	Low-fibrotic
TCGA-AR-A0U3	0	0.0301307	0.0389572	0.105343	0	0.185562	0.0141437	0.0250922	0.00894746	0	0	0	0.034088	0.175108	0.0964327	0.150834	0.0543009	0.0280094	0.0530509	0	0	0	0	0.366615	0.931167	Low-fibrotic
TCGA-AQ-A1H2	0	0	0.00703488	0.0578652	0	0.203133	0.00159224	0	0.00812769	0	0.00136742	0.0099503	0.0983016	0	0.0867836	0.415496	0	0	0.100198	0	0	0.01015	0	0.292144	0.966534	Low-fibrotic
TCGA-E2-A106	0	0.00928275	0.191146	0.0830566	0	0.112033	0	0.0522222	0.0015449	0	0	0.0479317	0.00102704	0.185032	0.0340009	0.109654	0.00403689	0	0.169032	0	0	0	0	0.201836	1.00425	Low-fibrotic
TCGA-A8-A06O	0.0600332	0	0.124134	0.0897373	0	0.153372	0.0180919	0.0428962	0.0231841	0	0	0.0214616	0.0302923	0.10362	0.0634517	0.155442	0.0565563	0.0123669	0.0453606	0	0	0	0	0.46683	0.886031	Low-fibrotic
TCGA-C8-A12M	0.0281596	0	0.162521	0.170364	0	0.107096	0.0353222	0.0293551	0.0126113	0.0436169	0	0.0286252	0	0.0461798	0.0567975	0.116031	0.00312196	0	0.160197	0	0	0	0	0.399703	0.916241	Low-fibrotic
TCGA-AR-A0TV	0.0325587	0	0.0859023	0.142232	0	0.115544	0.033906	0.0538435	0.0232617	0	0	0.0343166	0.0293644	0.14628	0.0973462	0.142973	0.0227856	0	0.039686	0	0	0	0	0.52478	0.857049	Low-fibrotic
TCGA-A2-A0D4	0.0417946	0	0.133494	0.0262963	0	0.168391	0	0.00740769	0	0.00269366	0	0.04924	0.00922293	0.087389	0.0551842	0.214624	0.0163174	0	0.187945	0	0	0	0	0.269634	0.971175	Low-fibrotic
TCGA-AO-A0JD	0.0371826	0	0.0338456	0.120375	0	0.168428	0.0280546	0.0752954	0.00619465	0.00284186	0	0.0255574	0.00919476	0.0548835	0.116684	0.151898	0.098947	0.0137115	0.0530405	0	0.0032421	0.000623003	0	0.415292	0.908817	Low-fibrotic
TCGA-A2-A1FV	0.0873987	0	0.0312668	0.0579957	0	0.268605	0	0.039082	0	0	0	0.0389209	0	0	0.0525715	0.23186	0.00178843	0	0.177885	0	0.0126259	0	0	0.164518	1.01582	Low-fibrotic
TCGA-D8-A1XR	0.00165821	0	0.0319645	0.0916889	0	0.120686	0	0.0396709	0.0326144	0	0	0.00933659	0.0348263	0.101929	0.0556522	0.21165	0.131801	0.0211747	0.0917169	0.00249966	0.0211304	0	0	0.269502	0.970355	Low-fibrotic
TCGA-E2-A15F	0.0861816	0.0491594	0.0842535	0.0069088	0	0.17591	0	0.066208	0.0264453	0	0.0107663	0	0.0046628	0.106713	0.0673332	0.139767	0.0113733	0.0528078	0.105122	0	0	0.00638774	0	0.389785	0.920204	Low-fibrotic
TCGA-EW-A1J6	0.0277222	0.0554945	0.0694549	0.0955623	0	0.123436	0.104215	0.00360491	0.00425016	0.0692028	0	0	0.015165	0.0392701	0.115507	0.189593	0.0317291	0.029343	0.0264498	0	0	0	0	0.522827	0.858978	Low-fibrotic
TCGA-D8-A27E	0.0067815	0	0.032949	0.114395	0	0.189092	0	0.0644974	0.0128236	0	0	0.0213588	0.136949	0	0.0778372	0.162851	0.0826289	0.00423431	0.0839529	0	0.00604732	0.00360187	0	0.261953	0.973683	Low-fibrotic
TCGA-A2-A0EY	0.0434881	0.0035856	0.100929	0.094269	0	0.199874	0.0157331	0.0327	0	0	0	0.0128561	0.0153117	0.092799	0.0732745	0.147943	0.049935	0	0.113022	0	0	0.00427921	0	0.461105	0.889324	Low-fibrotic
TCGA-B6-A0X5	0.059977	0	0.0648126	0.0587183	0	0.0869528	0	0.0456644	0	0	0	0.018963	0.0562677	0.167308	0.0584405	0.221198	0.00278661	0	0.158912	0	0	0	0.02	0.135191	1.02617	Low-fibrotic
TCGA-A8-A08G	0.0107203	0	0.0441483	0.0158876	0	0.11795	0.0392102	0	0	0.0762906	0	0.0200979	0.00148705	0.168067	0.0909176	0.218015	0.0198096	0	0.175481	0	0	0.0019178	0	0.367522	0.930655	Low-fibrotic
TCGA-A2-A0EQ	0.100943	0.0125269	0.0695158	0.117581	0	0.133077	0.103024	0.00258364	0.00229264	0.0176365	0	0.0520071	0.0109519	0.0877497	0.100555	0.104826	0.015686	0	0.0690428	0	0	0	0	0.623387	0.808279	Low-fibrotic
TCGA-A8-A081	0.0409139	0	0.12048	0.162367	0	0.0868165	0.0998354	0	0.0012582	0.0189967	0	0.0330397	0.0149252	0.0572831	0.0975031	0.142862	0.0249519	0	0.0987668	0	0	0	0	0.518188	0.86228	Low-fibrotic
TCGA-AN-A04C	0.0334084	0	0.14169	0.139037	0	0.140281	0.0130299	0.0562905	0	0.0173658	0	0.0278619	0.00470758	0.0649358	0.0822967	0.180218	0.0167428	0.0282561	0.0538788	0	0	0	0	0.428891	0.902537	Low-fibrotic
TCGA-AR-A1AT	0.0661357	0	0.0811864	0.165837	0	0.133829	0.0251754	0.0323676	0	0.0178522	0	0.0241965	0.0100439	0.07417	0.0905399	0.175677	0.0188167	0.0148252	0.0693474	0	0	0	0	0.547696	0.846573	Low-fibrotic
TCGA-C8-A1HG	0.0146915	0.0242735	0.110639	0.193959	0	0.11163	0.086531	0.015677	0.0133091	0.033537	0	0.027063	0	0.0382834	0.0718481	0.146603	0.0405827	0.00654173	0.0648318	0	0	0	0	0.544848	0.847787	Low-fibrotic
TCGA-C8-A1HK	0.0599674	0	0.183376	0.140783	0	0.160116	0.0552082	0.000438345	0	0.0443539	0	0.0128327	0	0.00232722	0.0844707	0.187824	0.0135767	0.0077293	0.0455802	0	0	0.00141697	0	0.390893	0.921001	Low-fibrotic
TCGA-BH-A0EE	0.051458	0	0.0196397	0.0841925	0	0.155146	0.0155437	0.0485614	0	0	0.0142664	0.0586935	0.0156712	0.124939	0.142396	0.110796	0	0.0991378	0.0498694	0	0	0.00968886	0	0.409697	0.912846	Low-fibrotic
TCGA-E2-A15P	0.0574093	0	0.148267	0.104065	0	0.0873991	0	0.0362489	0.000883311	0.0222066	0	0.015187	0.00160262	0.0362758	0.103922	0.158238	0.0449802	0	0.183314	0	0	0	0	0.343574	0.940847	Low-fibrotic
TCGA-EW-A1OX	0.0263187	0	0.0934838	0.0683044	0	0.0337931	0	0	0.0819217	0	0	0.0218678	0	0.31179	0.024928	0.203273	0	0.00514301	0.129176	0	0	0	0.02	0.131077	1.04413	Low-fibrotic
TCGA-C8-A275	0.0414107	0.0229146	0.0857649	0.11486	0	0.146001	0.0929729	0.0280296	0	0.00597901	0	0.0131026	0.00452041	0.113907	0.0909053	0.122158	0.0453584	0.0133062	0.0586659	0	0	0.000144314	0	0.576383	0.83577	Low-fibrotic
TCGA-C8-A1HM	0.0290047	0.00157854	0.0605359	0.16474	0	0.0579764	0.153468	0.0637145	0	0.0523879	0	0.060362	0.0039984	0.0178841	0.0943258	0.140871	0.000514499	0.0211966	0.072956	0	0	0.00448547	0	0.560291	0.836932	Low-fibrotic
TCGA-E2-A159	0.0523319	0	0.123761	0.136542	0	0.10539	0.062468	0.0248378	0.0271044	0.0347434	0	0.041894	0	0.0591039	0.071725	0.121179	0.0609132	0.0217849	0.0439256	0	0	0.0122962	0	0.563318	0.83947	Low-fibrotic
TCGA-E9-A22H	0.0412903	0	0.0470497	0.109757	0	0.118538	0.0575348	0	0.00368904	0.104115	0	0	0	0.0556287	0.127919	0.17812	0.0238611	0	0.132498	0	0	0	0	0.354967	0.935871	Low-fibrotic
TCGA-A2-A0ET	0.040335	0	0.0840878	0.11716	0	0.24833	0.0667248	0.0162989	0.00675809	0	0	0	0.0113974	0	0.0674784	0.165196	0.115487	0.01206	0.02211	0	0.026577	0	0	0.344764	0.939768	Low-fibrotic
TCGA-E2-A15T	0.0459105	0	0.0902479	0.0969445	0	0.137917	0.00128187	0.0455482	0.0208285	0	0	0.0153675	0.00617021	0.136207	0.0783294	0.130759	0.121158	0	0.0674653	0	0.00344344	0.00242181	0	0.268206	0.971196	Low-fibrotic
TCGA-AN-A03Y	0.007852	0.0178005	0.0619002	0.149406	0	0.115831	0.0208362	0.0356229	0.025019	0.0497537	0	0.0249011	0	0.0506949	0.101345	0.168645	0.0149879	0	0.13964	0	0	0.0157627	0	0.407165	0.912488	Low-fibrotic
TCGA-A7-A0CJ	0.0927794	0	0.0645828	0.0979994	0	0.107039	0.0377169	0.0263405	0.0227237	0	0	0.0487706	0.0151792	0.162226	0.0770513	0.12093	0.0413373	0.00370201	0.0742994	0	0	0.00732269	0	0.329756	0.945948	Low-fibrotic
TCGA-A8-A07U	0.0540609	0.0468057	0.0981144	0.0713922	0	0.116658	0.0965579	0.0545204	0	0.000656051	0	0.0543883	0.0287596	0.0698602	0.104512	0.083688	0.0180211	0.0465662	0.0526031	0	0	0.00283529	0	0.608484	0.816476	Low-fibrotic
TCGA-A2-A4S3	0.00684276	0.0212232	0.015694	0.183454	0	0.0423698	0.0556497	0.023161	0.00933737	0.0204168	0	0.0578274	0.00144013	0.127779	0.0929839	0.13924	0.0505301	0	0.152051	0	0	0	0	0.452651	0.891668	Low-fibrotic
TCGA-D8-A1JN	0.0524248	0	0.07316	0.136191	0	0.135705	0.0268208	0.0820108	0.00300193	0.042688	0	0.0218483	0.0230961	0	0.084636	0.148305	0.0360771	0	0.134035	0	0	0	0	0.291698	0.962842	Low-fibrotic
TCGA-C8-A1HE	0.00327844	0.01728	0.0612768	0.0662737	0	0.253586	0.0113985	0	0.00450348	0	0	0	0.00577926	0.0709921	0.099872	0.194844	0.0698537	0	0.141062	0	0	0	0	0.256846	0.976028	Low-fibrotic
TCGA-A8-A08L	0.0682776	0	0	0.151417	0	0.112682	0.102293	0	0	0.00444964	0	0.0664444	0.00437203	0.0785325	0.11498	0.189407	0.0151293	0.0111046	0.08	0	0.000911083	0	0	0.50007	0.868215	Low-fibrotic
TCGA-BH-A18H	0.0366992	0.0147277	0.107682	0.212159	0	0.0562253	0.100604	0	0.0382791	0.0171609	0	0.00428108	0.0275725	0.0809576	0.0983812	0.0881686	0.0241283	0.00454117	0.088432	0	0	0	0	0.606074	0.8191	Low-fibrotic
TCGA-C8-A27A	0.0459517	0	0.113924	0.0639847	0	0.209173	0.0168567	0.0485344	0.0283258	0	0	0.0153095	0	0.108373	0.0974345	0.131451	0.0821138	0.000351065	0.0245666	0	0	0.01365	0	0.298782	0.960651	Low-fibrotic
TCGA-A2-A0YC	0.0467926	0	0.0523269	0.0791527	0	0.139458	0	0.0173251	0.0302014	0.00117619	0	0.0243039	0.0180021	0.0673875	0.0687916	0.166781	0.129862	0.0144631	0.129116	0	0.00182438	0.0130364	0	0.409571	0.912107	Low-fibrotic
TCGA-B6-A0RO	0	0	0.079742	0.0810653	0	0.149229	0	0.0447019	0	0.0350908	0	0.0765794	0.0394091	0.0195077	0.0850347	0.249552	0.0329643	0.0158731	0.0560515	0	0.0351993	0	0	0.160799	1.01662	Low-fibrotic
TCGA-A8-A06N	0	0.0241949	0.0750511	0.053272	0	0.19648	0	0.0510101	0	0	0	0.0587887	0.00517065	0.028259	0.040728	0.332109	0	0	0.130399	0	0	0.00453736	0	0.157102	1.0173	Low-fibrotic
TCGA-BH-A18S	0	0.00807703	0.0751553	0.143196	0	0.0552158	0.00543693	0.0234743	0	0.0325658	0	0.0241109	0	0.0803221	0.0266339	0.402861	0	0.000886564	0.117466	0	0.00459854	0	0	0.272001	0.973958	Low-fibrotic
TCGA-A8-A08C	0	0.00494789	0.0315639	0.114805	0	0.169006	0.00155312	0.053974	0.0375683	0	0	0.0292421	0.025712	0	0.0582049	0.258594	0.0679621	0.0696988	0.0665803	0	0	0.0105869	0	0.189049	1.00516	Low-fibrotic
TCGA-C8-A1HO	0.000294252	0.000190564	0.163505	0.0867897	0	0.128471	0.0503187	0.0248017	0	0.0433737	0	0.0325443	0	0.0916998	0.076914	0.176848	0.0102301	0.00174289	0.106792	0	0	0.00548436	0	0.310831	0.954275	Low-fibrotic
TCGA-UU-A93S	0.0105834	0.00125327	0.132703	0.0947389	0	0	0.0402572	0.103577	0	0	0	0.0511828	0.0246933	0.167563	0.061322	0.122638	0	0.11415	0.0714727	0	0	0.00386454	0	0.324895	0.94901	Low-fibrotic
TCGA-BH-A209	0.0648265	0.00774268	0.0876265	0.161585	0	0.125925	0.0985945	0.018118	0	0.0151237	0	0.019601	0.0132349	0.0382198	0.0834686	0.101399	0.057365	0.0313362	0.0758337	0	0	0	0	0.64743	0.800254	Low-fibrotic
TCGA-D8-A1XC	0	0.0076207	0.00732493	0.0138243	0	0.142532	0	0.0139382	0.0168467	0	0	0.0364914	0.0371443	0.048054	0.0561806	0.506573	0	0	0.106471	0	0	0.00699959	0	0.196337	1.01585	Low-fibrotic
TCGA-B6-A0WV	0	0	0.100341	0.00688407	0	0.220073	0	0.0209724	0.0172002	0.026866	0	0.0453659	0	0.187529	0.10695	0.113317	0.0477694	0	0.106732	0	0	0	0.22	0.0934403	1.04567	Low-fibrotic
TCGA-D8-A1XF	0.00384334	0.000743156	0.184736	0.0627167	0	0.111309	0	0.00824964	0.018853	0	0	0.0547125	0	0.155063	0.109001	0.170039	0.024235	0	0.0964991	0	0	0	0	0.305644	0.959783	Low-fibrotic
TCGA-A8-A09E	0.0629269	0	0.0813245	0.082165	0	0.143133	0	0.0457798	0.00556271	0	0	0.0296984	0.00412522	0.0754389	0.117008	0.21872	0.0269709	0	0.105056	0	0	0.00209109	0	0.228701	0.989106	Low-fibrotic
TCGA-A2-A1G4	0.124906	0.03511	0.162491	0	0	0.0847385	0	0.0435845	0.0103466	0.0416137	0	0.00687985	0.00654989	0.0323422	0.0994927	0.235468	0.00888416	0	0.104876	0	0	0.00271798	0	0.398842	0.917486	Low-fibrotic
TCGA-A7-A0D9	0	0	0.140066	0.0698634	0	0.160191	0	0.03532	0	0.0110101	0	0.0434317	0	0.142059	0.0136945	0.200204	0.0248748	0.0784222	0.0808585	0	0	4.24612e-06	0	0.25725	0.976989	Low-fibrotic
TCGA-C8-A130	0.0249512	0	0.074249	0.214776	0	0.0963131	0	0.0191559	0.038588	0.0260884	0	0.0420081	0	0.0701783	0.0814672	0.153372	0.017245	0	0.141607	0	0	0	0	0.382819	0.923814	Low-fibrotic
TCGA-C8-A274	0	0.00940642	0.0119177	0.0441344	0	0.171049	0.0161295	0	0.0231753	0	0.00795168	0	0.134056	0.0089385	0.0935165	0.299209	0.0790974	0.0107348	0.0836189	0	0	0.00706501	0	0.184472	1.0074	Low-fibrotic
TCGA-B6-A0WS	0.0595176	0	0.0830202	0.082473	0	0.133322	0.0311087	0.0383453	0.0382242	0.0663293	0	0.0185353	0.00952734	0.0639547	0.0861204	0.109892	0.0649602	0.0411872	0.0734826	0	0	0	0	0.537755	0.853383	Low-fibrotic
TCGA-E2-A14P	0.0616963	0	0.146396	0.115917	0	0.144841	0.044379	0.0551253	0.0175562	0.00891265	0	0.020291	0.0148451	0.0925342	0.104552	0.0855825	0.0445765	0.00452204	0.0382741	0	0	0	0	0.538382	0.84899	Low-fibrotic
TCGA-D8-A27R	0.0371738	0	0.115339	0.131098	0	0.154798	0.01628	0.0283646	0.0244996	0.0267346	0	0.00427481	0.0277717	0.0457377	0.0813999	0.173738	0.0542287	0.000389059	0.0781737	0	0	0	0	0.49067	0.875256	Low-fibrotic
TCGA-A2-A0CW	0.0447301	0	0.00511093	0.105194	0	0.096288	0.0223488	0.0398615	0.00675795	0.0410901	0	0.0424353	0	0.0881335	0.125797	0.218327	0	0.0675145	0.0899528	0	0	0.00645904	0	0.404745	0.914174	Low-fibrotic
TCGA-LL-A442	0	0.0021127	5.8525e-05	0.0569328	0	0.0889003	0	0.00173943	0.00499629	0	0	0.0156101	0.22094	0	0.0476102	0.461933	0.0031278	0.0070704	0.0681584	0	0	0.0208103	0	0.278609	0.979952	Low-fibrotic
TCGA-D8-A1JS	0.00734155	0	0.0328625	0.0948055	0	0.0888278	0	0.0328929	0.00406451	0	0	0.012355	0.101574	0.124835	0.0557623	0.333863	0	0.00831122	0.0869747	0	0	0.0155305	0	0.185416	1.01141	Low-fibrotic
TCGA-E9-A3Q9	0	0.096259	0.226999	0.0280798	0	0.0834161	0	0	0	0.0802767	0	0.0292857	0.000171857	0	0.0917243	0.201645	0.0202319	0	0.0928048	0	0.036984	0.0121222	0	0.411027	0.911792	Low-fibrotic
TCGA-AO-A12B	0	0.00147361	0.0933877	0.138814	0	0.203476	0	0.0190927	0.00139525	0	0	0.00993833	0.0254869	0.0525585	0.106102	0.270234	0.0122813	0	0.0657591	0	0	0	0	0.248731	0.983032	Low-fibrotic
TCGA-BH-A1FJ	0.0601363	0	0.0513336	0.0583287	0	0.0978426	0	0.0653662	0.00318644	0.00518966	0	0.0321593	0.053585	0.0473104	0.0174049	0.255575	0.024902	0.131937	0.0893333	0	0	0.00640964	0	0.18346	1.00279	Low-fibrotic
TCGA-BH-A0HO	0.00743363	0.00195014	0.0709334	0.0338875	0	0.226977	0	0.0140183	0.00226205	0.0060955	0	0.0390072	0.0874008	0.0556718	0.0878599	0.273633	0.00302086	0	0.074786	0	0.00209525	0.0129678	0	0.356881	0.934492	Low-fibrotic
TCGA-EW-A1OY	0.0284514	0.00409351	0.0902596	0.0577866	0	0.162531	0	0	0.0182792	0.0151469	0	0.00343274	0.00955426	0.182459	0.159292	0.124329	0.029668	0	0.114716	0	0	0	0	0.383451	0.92443	Low-fibrotic
TCGA-E2-A14T	0	0.0453193	0.0610617	0.0243756	0	0.112633	0	0	0.00751249	0.0555922	0	0.0136672	0	0.279102	0.0704606	0.202611	0.00761404	0	0.120051	0	0	0	0	0.426341	0.904312	Low-fibrotic
TCGA-EW-A6SD	0.0174136	0.0491372	0.155608	0.0981691	0	0.0693896	0.0332404	0.0381002	0.00716738	0	0	0.0643501	0.0181227	0.0760012	0.124927	0.134738	0.0392214	0.00564015	0.0600324	0	0	0.0087426	0	0.552888	0.841737	Low-fibrotic
TCGA-D8-A13Y	0	0	0	0.0451066	0	0.152871	0	0.138086	0	0	0	0.0816612	0	0.131885	0.0311478	0.231387	0.142411	0.0128456	0.0176364	0	0.0149621	0	0.28	0.0845113	1.05779	Low-fibrotic
TCGA-EW-A1PA	0.0619389	0.0154311	0.137037	0.099771	0	0.14286	0	0.0339345	0.00324081	0.020409	0	0.00771792	0.00222832	0.0677822	0.0991251	0.104834	0.052696	0	0.150994	0	0	0	0	0.460504	0.888211	Low-fibrotic
TCGA-EW-A1P0	0.0183414	0	0.0726674	0.0637987	0	0.199001	0.00664365	0.0902475	0.0196607	0.0451923	0	0	0.00438529	0.123704	0.0743887	0.138359	0.0562172	0.0267208	0.0464983	0	0.0141749	0	0	0.404676	0.913696	Low-fibrotic
TCGA-C8-A12X	0.00588158	0	0.0358326	0.0106733	0	0.0756079	1.23823e-05	0	0.0415756	0.0555899	0	0	0	0.266131	0.0603923	0.278284	0.0290001	0	0.116274	0	0	0.0247455	0	0.317537	0.959742	Low-fibrotic
TCGA-AR-A1AW	0.14583	0	0.0891915	0.106093	0	0.122845	0.0956071	0.0429312	0.0013759	0.0248431	0	0.0272131	0.0185741	0.065087	0.0735266	0.113563	0	0.022725	0.0505943	0	0	0	0	0.650149	0.793246	Low-fibrotic
TCGA-D8-A1JI	0.00349243	0.00535593	0.0168658	0.0747951	0	0.130786	0	0	0	0	0	0.028314	0.03726	0.0166999	0.10367	0.24855	0.12429	0	0.116143	0	0.0937787	0	0	0.247503	0.979798	Low-fibrotic
TCGA-A8-A08B	0.089733	0	0.131859	0.124784	0	0.0670125	0.0010657	0.0112432	0.00262609	0.0209998	0	0.0390604	0	0.133115	0.123641	0.0820338	0	0.0540271	0.118799	0	0	0	0	0.460715	0.886867	Low-fibrotic
TCGA-A1-A0SG	0.235371	0	0.00862733	0.0293961	0	0.209151	0	0.0237142	0	0	0	0.0234896	0.00757779	0.0721412	0.081776	0.0814114	0.037376	0	0.189968	0	0	0	0	0.430194	0.901901	Low-fibrotic
TCGA-E2-A15R	0.0303146	0	0.110563	0.124886	0	0.105162	0	0.0265419	0	0	0	0.0285532	0.0599364	0	0.039718	0.302859	0	0.00119414	0.169	0	0	0.001272	0.06	0.112918	1.03225	Low-fibrotic
TCGA-BH-A1FL	0.101881	0	0.0907393	0.115985	0	0.15591	0	0.0781406	0	0.0263723	0	0.00607495	0.0250515	0.0181731	0.0661693	0.132711	0.0346555	0.000728224	0.147408	0	0	0	0	0.320578	0.950446	Low-fibrotic
TCGA-E9-A1R4	0.0369323	0	0.091128	0.0757767	0	0.208519	0.0224298	0.01119	0.0298484	0	0	0.0353947	0.0679469	0.0167773	0.0916989	0.179544	0.0524309	0.0310892	0.0425909	0	0	0.00670332	0	0.514169	0.864553	Low-fibrotic
TCGA-AO-A0JI	0.0707079	0	0.127632	0.0830323	0	0.125082	0	0.0181952	0	0.0426271	0	0.0282303	0	0	0.0793747	0.0697208	0.0121808	0	0.332568	0	0.0106495	0	0	0.421146	0.907103	Low-fibrotic
TCGA-A8-A08I	0.0541717	0	0.0673553	0.18429	0	0.0906121	0.0664347	0.0267967	0.0222587	0	0	0.0363652	0.023361	0.118586	0.0740092	0.116972	0.0711027	0	0.0442974	0	0	0.0033879	0	0.571399	0.836888	Low-fibrotic
TCGA-A8-A09K	0.00428982	0.0392927	0.100427	0.0953663	0	0.075961	0.0915981	0.0370811	0	0.0293169	0	0.0623016	0	0.0581738	0.0889095	0.100023	0.0157788	0	0.20148	0	0	0	0	0.510107	0.865666	Low-fibrotic
TCGA-A8-A07S	0.0166544	0	0.0356177	0.0127746	0	0.120435	0.0232148	0.0476813	0.0278515	0	0	0.0335137	0.0327765	0.101953	0.0784418	0.282425	0.0158118	0.0279684	0.124899	0	0	0.0179817	0	0.280495	0.96691	Low-fibrotic
TCGA-AQ-A54O	0.0244891	0.0258092	0.132267	0.187866	0	0	0	0.0835692	0.00330013	0.0632067	0	0.00977737	0	0.189449	0.0594349	0.0735394	0.040548	0	0.102328	0	0.00441669	0	0	0.395671	0.91795	Low-fibrotic
TCGA-E2-A15S	0.0258597	0	0.0711633	0.145213	0	0.118768	0	0	0.0348037	0	0	0.0582844	0.00039687	0.136571	0.051147	0.131513	0.136649	0	0.0896303	0	0	0	0	0.177626	1.00817	Low-fibrotic
TCGA-EW-A423	0	0.0211259	0.0164994	0.228845	0	0.0270919	0.0579776	0.0271409	0	0.031179	0	0	0	0.0970491	0.109235	0.252171	0.00697896	0	0.121844	0	0	0.00286347	0	0.384529	0.923111	Low-fibrotic
TCGA-E2-A107	0.0134112	0	0.0329898	0.088942	0	0.227623	0	0	0.0120086	0.0510065	0	0	0	0.0952367	0.0887436	0.140644	0.0392104	0	0.210184	0	0	0	0	0.29407	0.962662	Low-fibrotic
TCGA-UL-AAZ6	0	0.0789798	0.0424171	0.0158853	0	0.0767248	0	0	0.00737979	0.0324099	0	0.0507605	0.014237	0.176094	0.068844	0.279506	0.00462506	0.00748273	0.144653	0	0	0	0	0.335669	0.945841	Low-fibrotic
TCGA-A7-A3J0	0.0497838	0.00510987	0.0909233	0.118107	0	0.159904	0.015761	0.0878491	0.0155549	0	0	0.0452323	0.0102448	0.0834146	0.135135	0.1479	0.0111491	0	0.0239317	0	0	0	0	0.386695	0.923378	Low-fibrotic
TCGA-S3-A6ZH	0.0443142	0	0.0996999	0.11629	0	0.100804	0	0.0594284	0.0359408	0	0	0.0496938	0.0193931	0.0245809	0.0934023	0.0717714	0.111477	0.01813	0.155074	0	0	0	0	0.367079	0.929837	Low-fibrotic
TCGA-AC-A8OR	0	0.00314364	0.00986874	0.0157376	0	0.126979	0	0.0143584	0.0277045	0	0.0302557	0.020371	0.108531	0.097643	0.0355155	0.441641	0.00508862	0	0.0631621	0	0	0	0	0.306006	0.963858	Low-fibrotic
TCGA-E9-A1R2	0.0476721	0.00960711	0.0720687	0.132862	0	0.171462	0.00397511	0.0700624	0.0160218	0	0	0.0218699	0.0164308	0.0168347	0.124907	0.159576	0.0120631	0.0174464	0.107141	0	0	0	0	0.387684	0.921792	Low-fibrotic
TCGA-EW-A1J5	0.0417423	0.034901	0.0470275	0.0641945	0	0.132165	0.0758248	0.0119889	0.0142729	0.0468901	0	0.00761863	0.0080049	0.0621203	0.0904625	0.144766	0	0.0613651	0.156252	0	0	0.000402493	0	0.518924	0.863632	Low-fibrotic
TCGA-BH-A6R8	0.0425601	0	0.0976784	0.0500647	0	0.0754517	0.0169552	0.0242274	0.0237325	0.00596238	0	0.0499876	0.0540293	0.138414	0.104703	0.176784	0.0142349	0.0472634	0.0750074	0	0.00294399	0	0	0.460364	0.888288	Low-fibrotic
TCGA-A8-A09M	0.0398284	0	0.140968	0.0940238	0	0.131148	0.0616202	0	0.0427086	0.0333903	0	0.0334695	0.027818	0.0622951	0.0700587	0.15612	0.0368572	0.0363702	0.0323918	0	0	0.000932114	0	0.512146	0.864748	Low-fibrotic
TCGA-AO-A125	0.0264346	0	0	0	0	0.123895	0	0.147437	0	0.00250904	0.00654396	0.000410818	0.0301367	0.105834	0	0.311592	0	0.144819	0.0936163	0	0.00677305	0	0.16	0.102001	1.04503	Low-fibrotic
TCGA-AC-A62V	0	0.0385175	0.00174354	0.0597125	0	0.0954969	0	0.00264018	0.00809601	0	0.00164262	0	0.0228667	0.208842	0.0251831	0.326759	0.0054633	0	0.199311	0	0	0.00372568	0	0.378507	0.929309	Low-fibrotic
TCGA-E2-A15J	0	0.0199438	0.00241456	0.0362648	0	0.171434	0	0.102064	0.00461029	0	0	0.0426748	0.0730509	0.0788743	0.0427681	0.288195	0.00344852	0.111803	0.0187425	0	0	0.0037103	0	0.182691	1.01273	Low-fibrotic
TCGA-E9-A22D	0.0335329	0	0.047854	0.269453	0	0.0275119	0.150237	0.018669	0.0120907	0.0300457	0	0.0370651	0.0213882	0.0433291	0.0805287	0.117858	0.0232467	0.0207727	0.0664173	0	0	0	0	0.627873	0.802469	Low-fibrotic
TCGA-E9-A249	0.0323456	0.0159337	0	0.0981597	0	0.0699048	0.0292528	0.0125731	0.0166847	0.0893771	0	0	0	0.209898	0.140187	0.114193	0.0517377	0	0.119753	0	0	0	0	0.320566	0.954015	Low-fibrotic
TCGA-BH-A0E0	0.032906	0	0.0352624	0.0469887	0	0.0967871	0.0204278	0.0915517	0.0795973	0	0	0.0350286	0	0.0143023	0.0219381	0.0985573	0.261182	0.0821536	0.042697	0	0.0266916	0.0139287	0	0.358341	0.933588	Low-fibrotic
TCGA-LQ-A4E4	0.0241058	0	0.0785501	0.0866602	0	0.132868	0	0	0.0391076	0	0	0.0284244	0.0375233	0.0220298	0.0438945	0.278648	0.00122849	0	0.22696	0	0	0	0	0.201663	0.998621	Low-fibrotic
TCGA-A2-A4S0	0.0143886	0.0309113	0	0.0676706	0	0.145858	0	0.0647767	0	0	0	0.023922	0.110004	0.0101034	0.0702558	0.366649	0.00108973	0	0.0869586	0	0	0.00741163	0	0.146448	1.02467	Low-fibrotic
TCGA-BH-A0HU	0.00812387	0	0.0482376	0.215253	0	0.0841198	0	0.0373894	0.0944785	0	0	0	0.0180016	0.179443	0.0905894	0.118356	0.032973	0	0.0730349	0	0	0	0	0.336339	0.946216	Low-fibrotic
TCGA-5T-A9QA	0	0	0.0101201	0.00706606	0	0.18574	0	0.00329139	0.0393128	0	0.00261347	0	0	0.249173	0.0459239	0.287745	0.0696706	0	0.0966111	0	0	0.00273197	0	0.206667	1.01292	Low-fibrotic
TCGA-B6-A0IB	0.0797649	0	0.0610585	0.111346	0	0.137076	0	0	0.0578971	0	0	0.0871056	0.00812538	0.164715	0.061695	0.104303	0	0.0116915	0.115222	0	0	0	0.04	0.116647	1.03768	Low-fibrotic
TCGA-EW-A6SA	0.0715941	0	0.0945479	0.0964552	0	0.0607003	0	0.0512129	0.0154129	0	0	0.0153152	0	0.18799	0.0360008	0.190573	0	0	0.180198	0	0	0	0	0.169332	1.0149	Low-fibrotic
TCGA-S3-AA12	0.0222939	0	0.160683	0.113244	0	0.144572	0	0.0495139	0.030942	0	0.00603512	0.0114243	0.04604	0.0313211	0.0505334	0.17482	0.0273336	0.00137115	0.122279	0	0	0.00759404	0	0.2512	0.97851	Low-fibrotic
TCGA-AC-A5XU	0	0.0114738	0.193142	0.127356	0	0.139256	0	0.0119007	0.0363887	0	0	0.0433021	0	0.129806	0.0729557	0.121728	0.000942914	0	0.111747	0	0	0	0	0.396121	0.918055	Low-fibrotic
TCGA-A2-A04X	0.0443704	0	0.110402	0.106823	0	0.156628	0.0567685	0.0382166	0.0275947	0.0101532	0	0.0328206	0.00544498	0.0833612	0.0817365	0.135441	0.00969605	0.0276201	0.0693014	0	0	0.00362259	0	0.581391	0.831011	Low-fibrotic
TCGA-B6-A0WZ	0	0.0131042	0.0159194	0.171131	0	0	0	0.0421392	0.0507758	0	0.000692483	0	0	0.198959	0.0586018	0.229256	0.00228862	0.0302332	0.186899	0	0	0	0	0.195502	1.00844	Low-fibrotic
TCGA-A8-A079	0	0.0832814	0.28771	0.0235046	0	0.0919007	0	0	0.0104615	0.0235039	0	0	0.0106895	0.146669	0.0563954	0.165545	0.0081561	0	0.0921829	0	0	0	0	0.443294	0.89751	Low-fibrotic
TCGA-E2-A15G	0.0377681	0	0.041234	0.10607	0	0.180194	0	0.0663964	0	0	0	0.0200241	0.0999973	0	0.0620657	0.236459	0.0404346	0	0.108166	0	0	0.0011915	0	0.161271	1.0125	Low-fibrotic
TCGA-E9-A5UO	0	0	0.007118	0.0729222	0	0.0012102	0	0.048597	0.02417	0	0.0150025	0.0318844	0.0617303	0.270728	0.00366073	0.373349	0	0.0115476	0.0662599	0	0	0.0118198	0	0.213206	1.02038	Low-fibrotic
TCGA-E9-A247	0.0583376	0	0.058635	0.130065	0	0.159368	0	0.0395243	0.0178917	0	0	0.00221295	0.00505946	0.106296	0.0900889	0.174273	0.0166998	0.0143412	0.126646	0	0	0.000561372	0	0.233773	0.98661	Low-fibrotic
TCGA-E2-A105	0.00147544	0	0.144371	0.0517677	0	0.0883135	0	0.0217083	0.019684	0	0	0.0451582	0.000822675	0.168848	0.128634	0.18051	0.0800803	0	0.0686271	0	0	0	0	0.332545	0.947832	Low-fibrotic
TCGA-LL-A9Q3	0.00999069	0	0.0270863	0.180891	0	0.0876025	0.0371456	0	0.001686	0.0169174	0	0.014312	0.00463819	0.0316508	0.103339	0.228154	0.0235624	0	0.233024	0	0	0	0	0.409021	0.911807	Low-fibrotic
TCGA-LL-A50Y	0.0296278	0.074352	0.0507132	0.118375	0	0.0803877	0.001114	0	0.00725361	0	0	0.0185322	0.0190022	0.0432318	0.0739951	0.168522	0.138631	0	0.176262	0	0	0	0	0.454895	0.892875	Low-fibrotic
TCGA-BH-A8FY	0	0.0503142	0.0167916	0.0130963	0	0.118883	0	0.0201028	0	0	0.0328708	0.0237508	0.123915	0	0.0739418	0.307911	0.0867837	0	0.0897273	0	0.0381984	0.00371324	0	0.202328	0.997381	Low-fibrotic
TCGA-A8-A09Z	0.00102371	0	0.00496207	0.203966	0	0.0799686	0.0557232	0.0310161	0.0126982	0	0	0.108467	0.00185168	0.0362024	0.159898	0.247159	0.00768682	0	0.0475946	0	0.00178314	0	0	0.414889	0.912481	Low-fibrotic
TCGA-E2-A15K	0.0989474	0.012107	0.0519545	0.123315	0	0.135518	0.0354786	0.0482298	0.008399	0.022267	0	0.0128619	0.00256398	0.0517135	0.0801517	0.159198	0.0513691	0.0267859	0.0791398	0	0	0	0	0.530184	0.856997	Low-fibrotic
TCGA-E2-A576	0	0.0194621	0.170792	0.147287	0	0.0792518	0	0.0531257	0.0267637	0.00826187	0	0.0522164	0.0101717	0.0466281	0.076632	0.114548	0.0118591	0	0.183001	0	0	0	0	0.400944	0.915568	Low-fibrotic
TCGA-AR-A0TR	0.151684	0	0.133225	0.16566	0	0.0742612	0	0.0351697	0.0339661	0.0106773	0	0.0250561	0	0.0238916	0.0635609	0.137002	0.0138509	0.00386331	0.121402	0	0	0.00672923	0	0.339546	0.945089	Low-fibrotic
TCGA-EW-A2FW	0	0	0.192238	0.0297129	0	0.160013	0	0	0	0.0586975	0	0	0	0.185481	0.0485352	0.209599	0	0	0.106982	0.00874191	0	0	0	0.367411	0.931862	Low-fibrotic
TCGA-C8-A133	0.0478742	0	0.0337933	0.0253924	0	0.115055	0	0	0.011238	0	0	0.0366438	0.0218572	0	0.0366939	0.464734	0.00655872	0.0336761	0.149198	0	0	0.0172852	0	0.198811	1.00588	Low-fibrotic
TCGA-AN-A0XT	0.0798543	0	0.114346	0.0768429	0	0.153943	0	0.0197774	0.0181759	0.0234754	0	0.0302051	0.00269037	0.0189825	0.0732251	0.165888	0.0322016	0.00122392	0.188278	0	0	0.00089073	0	0.324865	0.948226	Low-fibrotic
TCGA-AC-A4ZE	0.0650921	0	0.0914461	0.149204	0	0.220135	0	0.0139622	0.00712961	0.0197514	0	0.021406	0.0418303	0	0.0648711	0.163155	0	0	0.142017	0	0	0	0	0.273493	0.971901	Low-fibrotic
TCGA-A8-A07Z	0.0304526	0	0	0.0660039	0	0.0446799	0.0169801	0.00207246	0.00877762	0.119349	0	0	0.0360939	0.0367133	0.0456461	0.248201	0.0773108	0.105371	0.162348	0	0	0	0	0.354476	0.935478	Low-fibrotic
TCGA-BH-A0HB	0.0389835	0	0.0919247	0.150358	0	0.176308	0.0301155	0.00312783	0.0386006	0.00268086	0	0.0162121	0.0304863	0.046413	0.0726622	0.148498	0.0721927	0.0166221	0.0648144	0	0	0	0	0.551686	0.847169	Low-fibrotic
TCGA-OL-A66H	0	0.0300559	0.12616	0.0508392	0	0.167666	0	0.0410078	0.00218221	0	0	0.0377468	0.0363364	0.021299	0.0952586	0.246359	0.00357743	0.0202752	0.0861118	0	0.00366873	0.0314571	0	0.466964	0.885969	Low-fibrotic
TCGA-S3-A6ZG	0.0497946	0	0.121041	0.107672	0	0.167898	0.00224314	0.0260152	0.0228772	0.0166521	0	0.0188633	0.0559247	0.0582235	0.0647265	0.14092	0.0119857	0.00676188	0.128402	0	0	0	0	0.40325	0.914347	Low-fibrotic
TCGA-E9-A54Y	0.168838	0	0.146411	0.0999661	0	0	0	0.0784281	0.0425521	0	0	0	0	0.133868	0.0398738	0.184587	0.0195795	0	0.0588391	0	0	0.0270577	0	0.347578	0.942263	Low-fibrotic
TCGA-BH-A0HN	0	0.0166512	0.03571	0.0851948	0	0.100726	0	0.026308	0.0127328	0	0	0	0.175435	0	0.0680224	0.320048	0.0767703	0	0.0675014	0.0149004	0	0	0	0.21567	0.99479	Low-fibrotic
TCGA-E2-A10C	0.0312546	0	0.110023	0.084945	0	0.190714	0.0591372	0	0.0122166	0.0188082	0	0.0170337	0.0228634	0.125391	0.0830605	0.100851	0.0318829	0	0.111818	0	0	0	0	0.492871	0.875212	Low-fibrotic
TCGA-A7-A0DB	0.0575907	0	0.0576442	0.037639	0	0.110813	0	0.00186079	0.00520602	0.0119822	0	0.0350656	0.0599288	0.181804	0.034069	0.122899	0.124562	0	0.134729	0	0.024207	0	0	0.427386	0.904455	Low-fibrotic
TCGA-3C-AAAU	0.094779	0	0.147964	0.059155	0	0.136642	0	0.0285142	0.00225153	0	0	0.00366306	0.000619776	0.0954275	0.0913471	0.269443	0.00987145	0	0.0603216	0	0	0	0	0.277068	0.972826	Low-fibrotic
TCGA-OL-A5RZ	0	0.0502173	0.132808	0.102668	0	0.0618719	0.018685	0.0745364	0	0	0	0.00948052	0.0259402	0.123323	0.0291383	0.305409	0.00163821	0.0159393	0.0453292	0	0.00104678	0.0019693	0	0.261913	0.977329	Low-fibrotic
TCGA-A8-A083	0	0	0.104643	0.0559049	0	0.140305	0	0.0615772	0.00946435	0.00115916	0	0.0783657	0.068981	0.0356403	0.0691521	0.209054	0.0651677	0.00547798	0.0902704	0	0	0.00483609	0	0.171283	1.00768	Low-fibrotic
TCGA-OL-A5D8	0.0148137	0	0.115114	0.133584	0	0.0625952	0.0229033	0.0431875	0.00489613	0	0	0.00116528	0.0224834	0.142279	0.139001	0.104641	0.0584701	0	0.134867	0	0	0	0	0.344396	0.940644	Low-fibrotic
TCGA-E9-A5UP	0	0.0189299	0.0178052	0.056467	0	0	0	0.0868485	0.0289722	0	0.0111204	0.0485214	0.00938694	0.413081	0.0117529	0.104568	0	0.17518	0.0130029	0	0	0.00436398	0	0.311021	0.974704	Low-fibrotic
TCGA-B6-A0IC	0	0.0141845	0.0122809	0.0269522	0	0.129411	0	0	0.0338734	0	0	0.0646058	0.0894387	0.108826	0.0636814	0.315742	0.102542	0.0147248	0.0233153	0	0	0.000422543	0	0.155603	1.02662	Low-fibrotic
TCGA-A2-A0CY	0.0411783	0	0.059684	0.192439	0	0	0	0.0895943	0.0278442	0	0	0.0420581	0	0.340309	0.000482671	0.146773	0	0.0162284	0.0174459	0	0	0.0259628	0	0.188103	1.02522	Low-fibrotic
TCGA-E9-A245	0.0696648	0	0.243842	0.0228747	0	0.144429	0	0.0221491	0	0	0	0	0.0659773	0.011277	0.0582181	0.208993	0.0342409	0	0.118335	0	0	0	0	0.327101	0.952061	Low-fibrotic
TCGA-E9-A1RG	0.0324613	0	0.112258	0.153028	0	0.0216416	0	0.0499841	0.0484667	0	0	0.0431427	0.0158084	0.0369758	0.0975006	0.174734	0.131045	0	0.0678541	0	0	0.0150997	0	0.454687	0.891591	Low-fibrotic
TCGA-BH-A0HL	0	0.00936093	0.0644483	0.0584289	0	0.0577108	0	0	0.0420047	0	0	0	0	0.284841	0.0147075	0.316942	0.0154755	0	0.0474495	0	0.0709719	0.0176593	0	0.148225	1.04601	Low-fibrotic
TCGA-A2-A0D3	0.15667	0	0.097395	0.106539	0	0.128883	0	0.0621346	0	0.0480607	0	0.0599214	0.0113197	0.0646387	0.0880714	0.0974249	0.0236719	0.013902	0.0308196	0	0.0105476	0	0	0.416856	0.908738	Low-fibrotic
TCGA-A7-A4SF	0.102891	0	0.126172	0.192311	0	0.048156	0	0	0.000220108	0	0	0	0.0144895	0.145424	0.120979	0.127257	0.023306	0	0.098796	0	0	0	0	0.45046	0.892051	Low-fibrotic
TCGA-BH-A0W3	0	0	0.0290984	0.0846871	0	0.127601	0	0.0623705	0.0260824	0	0	0.0119491	0.149446	0	0.07325	0.334778	0.000986019	0	0.0977426	0	0.00109927	0.000908596	0	0.229759	0.989433	Low-fibrotic
TCGA-D8-A1Y3	0.0527207	0	0.0159705	0.14611	0	0.0787468	0.0230773	0.0713363	0.00298138	0	0	0.0119455	0.0642566	0.105585	0.0778532	0.226741	0.0019316	0.0125279	0.101233	0	0	0.00698456	0	0.484776	0.877922	Low-fibrotic
TCGA-GM-A2DC	0.0435986	0.00157487	0.092618	0.221777	0	0.0557207	0.0117315	0.0636172	0.0101105	0	0	0.0438147	0.0372952	0.0166931	0.0977031	0.161127	0.013267	0	0.124671	0	0	0.0046809	0	0.310889	0.955411	Low-fibrotic
TCGA-3C-AALI	0.0274542	0.0351247	0.153392	0.122401	0	0.0703052	0.0145958	0.00549032	0.0213318	0	0	0.0776362	0.00815213	0.0965056	0.115678	0.124444	0	0.0346215	0.0912982	0	0	0.00156886	0	0.523962	0.855277	Low-fibrotic
TCGA-E2-A109	0.0493256	0	0.202929	0.11868	0	0.125932	0.00743162	0	0.00516006	0.0249735	0	7.37307e-05	0.00909827	0.139161	0.109017	0.102277	0	0	0.105941	0	0	0	0	0.473417	0.880467	Low-fibrotic
TCGA-S3-AA17	0.105627	0	0.111155	0.0998012	0	0.0644721	0.0782799	0.034608	0.0434719	0.0170244	0.00740894	0.0133856	0.0288055	0.0730896	0.086358	0.132258	0.00806354	0.0402649	0.0559255	0	0	0	0	0.615927	0.814452	Low-fibrotic
TCGA-E2-A56Z	0.0144013	0	0.0750208	0.13854	0	0.032115	0	0	0.037245	0.0866645	0	0.0435119	0.0222623	0.175424	0.132987	0.125318	0.00681018	0	0.103031	0	0.00666896	0	0	0.317839	0.955182	Low-fibrotic
TCGA-LL-A5YM	0	0.0361259	0.0957881	0.174139	0	0.0230485	0.00375994	0.00586283	0.0128575	0.00451289	0	0	0.0197732	0.185393	0.0677127	0.23133	0.00328237	0	0.136414	0	0	0	0	0.442591	0.89643	Low-fibrotic
TCGA-EW-A1OV	0.0804773	0	0.0751945	0.160016	0	0.122101	0.064663	0.0258974	0.0280341	0.0195498	0	0.0479904	0.0259835	0.0425801	0.0794131	0.136616	0.0101861	0.00603439	0.073848	0	0.00141634	0	0	0.637878	0.800416	Low-fibrotic
TCGA-D8-A1XL	0.0504664	0.0256293	0.0844704	0.21572	0	0.0729815	0.0551314	0.0210013	0.0130805	0	0	0.0386117	0.0405439	0.0104368	0.0794846	0.190932	0.0123233	0.0545275	0.0310817	0	0.000987815	0.00259008	0	0.568894	0.835165	Low-fibrotic
TCGA-E9-A228	0	0	0.00346423	0.0670055	0	0.1014	0	0.00268106	0.00807647	0	0	0	0.0100452	0.260582	0.0368315	0.267117	0.0865473	0	0.125625	0	0.0306244	0	0	0.441181	0.89789	Low-fibrotic
TCGA-AC-A3YJ	0	0.0050713	0.037123	0.208543	0	0.0343364	0.0235574	0.0137599	0.0169514	0.00871526	0	0	0.0295644	0.0301058	0.0437005	0.322925	0.145136	0	0.080511	0	0	0	0	0.360177	0.933401	Low-fibrotic
TCGA-A1-A0SQ	0.000795317	0	0.200088	0.0355715	0	0.195525	0	0.00264415	0	0	0	0.0376763	0.0376488	0.087563	0.0211309	0.171028	0.0309596	0.0032376	0.143964	0	0.0321684	0	0	0.28816	0.964008	Low-fibrotic
TCGA-PL-A8LX	0	0.0453783	0.0440604	0.0309819	0	0.14403	0.0110565	0	0.0431468	0	0	0.0438252	0	0.108586	0.0241749	0.343593	0.0178163	0	0.143351	0	0	0	0	0.251134	0.981006	Low-fibrotic
TCGA-AO-A0J7	0.0474571	0	0.0420776	0.0156863	0	0.19602	0.0347258	0.0344489	0.00342774	0.00271395	0	0.0302103	0	0.138758	0.085192	0.138526	0.119178	0	0.111578	0	0	0	0	0.250715	0.977265	Low-fibrotic
TCGA-AN-A0XR	0	0	0.059545	0.0285404	0	0.048979	0	0.0755744	0.0809268	0.00454807	0	0	0	0.189527	0.121075	0.0920422	0.200499	0.0434998	0.0542246	0	0	0.00101857	0	0.255978	0.983229	Low-fibrotic
TCGA-AC-A7VB	0	0	0.185134	0.153761	0	0	0	0.0188681	0.0326816	0	0	0	0.033569	0.202963	0.0771383	0.225097	0	0	0.0621701	0	0	0.00861709	0	0.150981	1.03139	Low-fibrotic
TCGA-B6-A0IA	0	0.00895239	0.00305685	0.025518	0	0.106151	0	0.0594321	0.00214366	0.00292942	0	0.0276946	0	0.370393	0	0.217598	0.018932	0.142756	0.0144429	0	0	0	0	0.278458	0.992379	Low-fibrotic
TCGA-E2-A15O	0.0504504	0	0.0704242	0.10363	0	0.192554	0	0.00964129	0.000166113	0	0	0	0	0.1933	0.083465	0.106587	0.0526588	0	0.133877	0	0	0.00324708	0	0.364727	0.931549	Low-fibrotic
TCGA-3C-AALJ	0.0221358	0.00696924	0.0738485	0.155382	0	0.158003	0.00773259	0.0103248	0	0.0540554	0	0.00593893	0.0147892	0.183198	0.0910777	0.121639	0.0258429	0	0.0690637	0	0	0	0	0.516027	0.860517	Low-fibrotic
TCGA-B6-A0X4	0	0.0308578	0.0185766	0.020271	0	0.119234	0	0.0385739	0	0	0	0.0524765	0	0.0692339	0.059345	0.330161	0.0709418	0	0.175832	0	0.0144957	0	0.38	0.0737711	1.05223	Low-fibrotic
TCGA-E9-A54X	0	0.00368908	0.0387093	0.0394567	0	0.00964227	0	0.1311	0	0	0	0.079314	0	0.240366	0.0385713	0.360524	0	0	0.0318501	0	0	0.0267768	0.04	0.122033	1.057	Low-fibrotic
TCGA-B6-A0RL	0	0.0863261	0.0595292	0.107914	0	0.0887782	0	0.0261366	0	0	0	0	0.0127225	0.270924	0	0.15465	0	0.0615153	0.109424	0	0.0220802	0	0.18	0.0972255	1.04885	Low-fibrotic
TCGA-A7-A3RF	0.0277794	0	0.0692633	0.082029	0	0.0758931	0	0.0105988	0.0585957	0	0	0.0178208	0	0.232496	0.0481047	0.230674	0	0	0.146745	0	0	0	0	0.279434	0.971409	Low-fibrotic
TCGA-A8-A091	0.0674719	0	0.08544	0.158724	0	0.188934	0	0.0264545	0	0	0	0.00781356	0.0146911	0.0314214	0.0554283	0.185738	0.0672065	0	0.110676	0	0	0	0	0.289792	0.962587	Low-fibrotic
TCGA-AO-A1KQ	0.00264475	0.0392835	0.11173	0.238921	0	0.0306511	0.0248262	0.0662078	0	0.0438505	0	0.0580395	0.00715104	0.106432	0.0668635	0.122555	0	0.00503927	0.0758038	0	0	0	0	0.548761	0.842423	Low-fibrotic
TCGA-C8-A12U	0	0.0341489	0.0668355	0.236673	0	0	0.100031	0.0247126	0	0.00470677	0	0.0546987	0.00809031	0.0526545	0.0930247	0.133597	0.0145928	0	0.176234	0	0	0	0	0.506291	0.866682	Low-fibrotic
TCGA-C8-A8HP	0.0366548	0.0126628	0.141656	0.163184	0	0.0905744	0.0327621	0.0455884	0.0245199	0	0	0.0467808	0.0201924	0.0617892	0.07714	0.146794	0.0385067	0.00370109	0.0562274	0	0	0.00126588	0	0.598455	0.821002	Low-fibrotic
TCGA-AN-A0FF	0.0194483	0.0329354	0.0967081	0.0399743	0	0.126728	0	0.00102173	0.00544329	0.095361	0	0	0	0.144818	0.0999518	0.262544	0.00594286	0	0.0691228	0	0	0	0	0.4923	0.872202	Low-fibrotic
TCGA-E2-A2P6	0.0795855	0	0.0705848	0.009597	0	0.170854	0	0.0262776	0.00532682	0	0	0.0381092	0.000100093	0.00530092	0.080816	0.276016	0.0132736	0	0.201219	0	0.0170291	0.00591049	0	0.350581	0.937026	Low-fibrotic
TCGA-D8-A73X	0.0180257	0	0.130386	0.0595084	0	0.0995622	0	0	0.00526913	0.0301547	0	0.00263242	0	0.16414	0.061111	0.189743	0.0335841	0	0.204511	0	0	0.00137195	0	0.442761	0.89669	Low-fibrotic
TCGA-LL-A6FP	0	0	0.0598203	0.0179207	0	0.100784	0	0.0146122	0	0.00808808	0	0	0.0430726	0.0152865	0.0303658	0.439784	0.0880417	0	0.145355	0	0	0.0368692	0	0.149571	1.02902	Low-fibrotic
TCGA-S3-AA11	0.0669717	0	0.0872365	0.0637246	0	0.0779694	0	0.0417319	0.0150551	0	0	0.00340151	0	0.156857	0.0717072	0.201437	0	0	0.213907	0	0	0	0	0.291973	0.963712	Low-fibrotic
TCGA-LL-A7T0	0.0202735	0.021205	0.148617	0.222413	0	0	0.0144512	0.0286746	0.0117191	0.0305885	0	0.021796	0	0.117396	0.0696171	0.2037	0.0194784	0	0.0697952	0	0	0.000275321	0	0.514493	0.861494	Low-fibrotic
TCGA-BH-A0DH	0	0.0093283	0.317917	0.0250223	0	0.134934	0.0100172	0	0.024146	0.0381562	0	0	0	0.10225	0.0738027	0.103162	0.0485938	0	0.112671	0	0	0	0	0.501554	0.86481	Low-fibrotic
TCGA-AC-A2BM	0	0.0404338	0.14117	0.0545944	0	0.271994	0.00598884	0.0149351	0.00360511	0.0107541	0	0.00773038	0	0.0367151	0.087342	0.15725	0	0.0306175	0.119434	0	0	0.0174362	0	0.4846	0.8769	Low-fibrotic
TCGA-B6-A0X1	0.0138729	0	0.0758301	0.133255	0	0.0577809	0.113271	0.0989792	0.038284	0	0	0.0789237	0.0276497	0.0192417	0.102882	0.109965	0	0.0918663	0.0272451	0	0	0.010954	0	0.400682	0.916585	Low-fibrotic
TCGA-E9-A248	0.0685499	0.00799447	0.112469	0.118127	0	0.142886	0.0965676	0	6.28992e-05	0.0501677	0	0.0119897	0	0.116289	0.0744888	0.118211	0.0216321	0.0119924	0.0485718	0	0	0	0	0.612285	0.815597	Low-fibrotic
TCGA-E2-A1IU	0.0727723	0.0450671	0.11223	0.0725516	0	0.130268	0	0.0244901	0	0.0293068	0	0.0424456	0	0.0461513	0.075449	0.16869	0.0394568	0	0.141121	0	0	0	0	0.374609	0.926836	Low-fibrotic
TCGA-A2-A04Y	0	0.0491028	0.0972659	0.156593	0	0.181581	0.00624133	0	0.00475791	0.0167513	0	0.00911724	0.015192	0.0613495	0.106564	0.194803	0.00331212	0.000783703	0.0830287	0	0.0135571	0	0	0.47902	0.879198	Low-fibrotic
TCGA-D8-A27P	0.0311845	0	0.106594	0.116068	0	0.0875656	0	0.0600939	0	0	0	0.0353559	0	0.144938	0.0448913	0.187468	0.0801931	0	0.105648	0	0	0	0	0.27217	0.969729	Low-fibrotic
TCGA-E2-A15I	0.086923	0	0.0493809	0.142992	0	0.182842	0.00126134	0.0528133	0.00694828	0.0496497	0	0.0212174	0	0.040226	0.080983	0.0986768	0.0836175	0.0184265	0.0776904	0	0	0.00635179	0	0.425673	0.904008	Low-fibrotic
TCGA-A1-A0SK	0	0.0244317	0.152653	0.17786	0	0.175133	0	0.032618	0.0366678	0	0	0	0.00428912	0.243864	0.0343453	0	0	0	0.0190841	0	0.0990536	0	0	0.187016	1.01885	Low-fibrotic
TCGA-B6-A0IE	0.0787546	0	0.29206	0.163827	0	0.0681218	0	0	0.0476364	0	0	0.0157511	0.00537009	0.0253237	0.0648327	0.130758	0.0177377	0	0.0898272	0	0	0	0	0.463257	0.886379	Low-fibrotic
TCGA-BH-A0B6	0.0830616	0	0.0700209	0.177774	0	0.0650427	0.0367023	0.043714	0.0416409	0	0	0.049001	0.0607479	0.0635099	0.0835346	0.076784	0.0565783	0.0101069	0.0817809	0	0	0	0	0.623444	0.81148	Low-fibrotic
TCGA-V7-A7HQ	0	0.0253745	0.172251	0.14109	0	0.0750766	0.00209012	0	0.00397619	0.016961	0	0	0.00301979	0.0687187	0.0590605	0.280335	0.0261346	0	0.125912	0	0	0	0	0.367222	0.930713	Low-fibrotic
TCGA-PE-A5DD	0.0491732	0	0.0877761	0.182148	0	0.174324	0.0122224	0	0.0283303	0	0	0.0114279	0.0100236	0.0882813	0.0986215	0.0784037	0.00685816	0	0.17241	0	0	0	0	0.435576	0.899395	Low-fibrotic
TCGA-E2-A570	0.0502714	0	0.0448487	0.112362	0	0.230736	0	0.0438658	0.0229396	0	0	0.028847	0.076587	0.0279937	0.0389718	0.186888	0.00400251	0.0272445	0.100194	0	0	0.00424821	0	0.208137	0.996592	Low-fibrotic
TCGA-B6-A2IU	0.110646	0	0.169021	0.0948414	0	0.132602	0	0.0312907	0	0.012106	0	0.0270746	0	0.00549798	0.0875186	0.155609	0.0580807	0	0.112776	0	0.00141907	0.00151693	0	0.267436	0.976506	Low-fibrotic
TCGA-AC-A2QJ	0	0.00876118	0.0304922	0.081863	0	0.0511668	0.0038889	0.0384275	0.0177707	0.028285	0	0.0240792	0.0653804	0.205337	0.0399321	0.312892	0.0571313	0	0.0345928	0	0	0	0	0.596002	0.814882	Low-fibrotic
TCGA-Z7-A8R6	0.0303861	0	0.0679711	0.10723	0	0.142879	0	0	0.0265134	0.0271871	0	0.0261305	0.0107532	0.161797	0.102645	0.105043	0.0957228	0	0.0957428	0	0	0	0	0.369348	0.929229	Low-fibrotic
TCGA-OL-A5DA	0.00113211	0.0170516	0.0464865	0.258812	0	0.0414086	0.0749284	0.0148554	0.0096684	0.0100772	0	0.0275539	0	0.0897602	0.133814	0.100569	0.0128683	0	0.161014	0	0	0	0	0.354573	0.937789	Low-fibrotic
TCGA-WT-AB41	0.115279	0	0.0924089	0.229217	0	0.013388	0.00386843	0.0801978	0.0168024	0	0	0.0539107	0.0290336	0.0330586	0.0595231	0.135366	0.0437049	0.0118364	0.0824054	0	0	0	0	0.592584	0.822531	Low-fibrotic
TCGA-LL-A7SZ	0	0.0645529	0.179046	0.14892	0	0.108714	0.0380108	0.0241745	0.038808	0.00416454	0	0.00844139	0.00238355	0.0471787	0.0714614	0.173193	0.0356034	0	0.0553477	0	0	0	0	0.595574	0.820398	Low-fibrotic
TCGA-B6-A0IP	0.094698	0.114934	0.0640964	0.124473	0	0.131992	0.0168398	0	0	0.0608046	0	0.0127997	0.00102669	0.103424	0.0685573	0.0657623	0.0136502	0	0.126943	0	0	0	0	0.407379	0.912691	Low-fibrotic
TCGA-GM-A2DO	0.168338	0	0.0434256	0.162695	0	0.111189	0.0467051	0.0168409	0.0369563	0.016862	0	0.0319668	0.0183896	0.0798525	0.0834355	0.0645487	0.0305126	0.0115551	0.0767269	0	0	0	0	0.662042	0.784254	Low-fibrotic
TCGA-LL-A6FQ	0	0.0250965	0.0309711	0.116738	0	0.0394877	0	0.0474906	0.00862333	0	0.000882279	0	0.0440577	0.319361	0.0775849	0.21655	0.0297186	0	0.0407186	0	0.00271861	0	0	0.434117	0.901678	Low-fibrotic
TCGA-E2-A572	0.021568	0	0.242828	0.194005	0	0	0	0.033361	0.0391294	0	0.0209597	0	0.0210904	0.0972755	0.0621798	0.226725	0	0	0.040878	0	0	0	0	0.251651	0.988858	Low-fibrotic
TCGA-B6-A408	0.0371637	0.0283185	0.135063	0.102821	0	0.0523888	0.0187443	0.0577767	0.0137824	0.0121898	0	0.0363675	0.0111366	0.0928183	0.0774647	0.186275	0	0.0367703	0.100919	0	0	0	0	0.519287	0.861392	Low-fibrotic
TCGA-E2-A1BD	0	0.00065573	0.0586161	0	0	0.116805	0	0	0.00693201	0.0803492	0	0.00476378	0	0.164613	0.131569	0.152923	0.0608762	0	0.221897	0	0	0	0	0.271362	0.975307	Low-fibrotic
TCGA-A8-A09B	0.0617983	0	0.101264	0.0779198	0	0.201792	0	0.0174443	0	0.00120993	0	0.0250158	0.0250124	0.0188036	0.0934307	0.207535	0.0470762	0	0.113469	0	0	0.00822897	0	0.258672	0.974747	Low-fibrotic
TCGA-E9-A1N5	0.0118665	0	0.00331896	0.150088	0	0.101899	0.0169762	0	0.0216854	0.00774542	0	0.0612871	0.0416402	0.10525	0.0782325	0.180826	0.019471	0.00606409	0.193649	0	0	0	0	0.488588	0.874688	Low-fibrotic
TCGA-B6-A40C	0	0.0072076	0.100701	0.141423	0	0.15516	0	0.0603081	0.0447274	0	0	0.0307874	0.0812688	0.0444574	0.0693658	0.179603	0.00358252	0.0171873	0.0497935	0	0	0.0144271	0	0.359211	0.933846	Low-fibrotic
TCGA-C8-A138	0.0782806	0	0.115229	0.181021	0	0.0581392	0.0493799	0.0391547	0.0479863	0.00351313	0	0.0207803	0	0.048869	0.0689706	0.11054	0.0379013	0.0487862	0.091449	0	0	0	0	0.575403	0.833658	Low-fibrotic
TCGA-D8-A3Z6	0	0.00856636	0.192328	0.101391	0	0.139957	0	0	0.0350499	0	0	0.000855343	0.0138969	0.123683	0.0913304	0.118	0.00864559	0	0.166296	0	0	0	0	0.297776	0.962106	Low-fibrotic
TCGA-E2-A1B4	0.0636883	0	0.0674909	0.066217	0	0.193294	0	0.0735128	0.022234	0	0	0.0401579	0.038995	0.0324913	0.0495123	0.175414	0.00105984	0.0528945	0.118268	0	0	0.00477067	0	0.190169	1.00187	Low-fibrotic
TCGA-E9-A3HO	0.0198157	0.00625452	0.0306665	0.214224	0	0.103374	0.0230203	0.0430397	0	0	0	0.0462505	0.0459143	0.0878656	0.142523	0.132637	0.0316571	0	0.0727577	0	0	0	0	0.451843	0.891294	Low-fibrotic
TCGA-BH-A0BT	0.020103	0.0360619	0.0227176	0.162477	0	0.125353	0.00406348	0.0412734	0.00944628	0.0186097	0	0.0418662	0.0341895	0.0830307	0.142926	0.0878679	0.0982364	0.0130876	0.0586899	0	0	0	0	0.421586	0.906019	Low-fibrotic
TCGA-AC-A3TN	0.0146566	0	0.0883343	0.115633	0	0.239383	0	0.0452176	0.00445384	0.0107964	0	0.0133438	0.0416996	0.0560511	0.0560413	0.143537	0	0.0520304	0.11439	0	0	0.00443254	0	0.245492	0.98182	Low-fibrotic
TCGA-BH-A5J0	0.012014	0.014769	0.0364419	0.157229	0	0.0858191	0.0587803	0.0145533	0.0201702	0	0	0.0423837	0.0149128	0.0769062	0.0856558	0.175925	0.0804323	0	0.124007	0	0	0	0	0.560105	0.844773	Low-fibrotic
TCGA-A2-A0CQ	0	0.0306778	0.0179845	0.0969997	0	0.230886	0	0.00617001	0	0	0	0	0.0847702	0	0.105234	0.348533	0.0432954	0	0.00181095	0	0.0336385	0	0	0.272975	0.974969	Low-fibrotic
TCGA-GM-A2D9	0.00158238	0.0180919	0.145981	0.106933	0	0.122915	0	0	0.0193665	0.0471576	0	0.00800806	0.00163704	0.0629779	0.0869214	0.254812	0.0340314	0	0.0639036	0	0.0256823	0	0	0.380324	0.924509	Low-fibrotic
TCGA-OL-A66O	0	0.0210752	0.294858	0.125386	0	0.0621004	0	0.0354687	0.021716	0	0	0.0760639	0.000565093	0.0560335	0.0312716	0.149566	0	0.00257819	0.114376	0	0	0.00894272	0	0.317973	0.961427	Low-fibrotic
TCGA-JL-A3YX	0.0710071	0	0.18165	0.128538	0	0.0889616	0	0.0461924	0	0	0	0.0424687	0.0112425	0.00505592	0.032388	0.146361	0.0240835	0.00991298	0.210875	0	0	0.00126347	0	0.304938	0.959866	Low-fibrotic
TCGA-LL-A5YL	0.105441	0.00612872	0.0358197	0.23257	0	0.0145003	0.0116074	0.0117292	0.00540435	0.00547209	0	0.0524036	0.0280384	0.0522193	0.0711784	0.190911	0.0163137	0.000536295	0.159727	0	0	0	0	0.464061	0.886682	Low-fibrotic
TCGA-A7-A56D	0	0.0466815	0.169312	0.0941074	0	0.0253316	0.00452548	0.010635	0.0159386	0	0	0.0713162	0.0427084	0.134603	0.0268992	0.194681	0.00925959	0.0669589	0.0822825	0	0	0.00475941	0	0.452612	0.891793	Low-fibrotic
TCGA-E2-A1L7	0.0422056	0	0.0896149	0.173027	0	0.14615	0.0545303	0.0274467	0.00178373	0.0173367	0	0.0263125	0.0085633	0.0365588	0.0941408	0.158259	0.0594119	0.0159903	0.0486685	0	0	0	0	0.540137	0.850046	Low-fibrotic
TCGA-E2-A15D	0.0465045	0.00539189	0.0893149	0.163817	0	0.0859508	0	0.089429	0	0.102472	0	0.0122099	0.0191542	0.124361	0.0735409	0.0933774	0.0138505	0	0.0806263	0	0	0	0	0.354298	0.937222	Low-fibrotic
TCGA-C8-A12Y	0	0.00668225	0.15211	0.128872	0	0.0214169	0.00128637	0.06882	0.0411331	0	0	0.0503296	0.0333305	0.0919498	0.0921767	0.130559	0.018386	0.0173305	0.145617	0	0	0	0	0.361137	0.932716	Low-fibrotic
TCGA-A2-A3XV	0	0.00504509	0.0316141	0.112499	0	0.057323	0.00348871	0.0590727	0	0.0422562	0	0	0.0166776	0.114501	0.0810035	0.401463	0.0192703	0	0.0554443	0	0.00034106	0	0	0.369663	0.931916	Low-fibrotic
TCGA-LL-A5YN	0.124647	0	0.0470646	0.1587	0	0.107126	0.0282032	0.0331463	0.0830203	0.00810835	0	0.0332362	0.0229407	0.0598831	0.0666399	0.100641	0.0483329	0.0173932	0.0609181	0	0	0	0	0.619743	0.809037	Low-fibrotic
TCGA-D8-A1XK	0.0367583	0	0.0760673	0.110579	0	0.163651	0.0683992	0.0363529	0	0	0.0129598	0.00834897	0.0218427	0.154522	0.0754147	0.144467	0.0247052	0.0403457	0.00994097	0	0	0.0156455	0	0.489759	0.874487	Low-fibrotic
TCGA-AN-A04D	0.0354453	0	0.0844495	0.122904	0	0	0	0.0826333	0	0.0283753	0.0210713	0	0.0126822	0.086382	0.0643827	0.316226	0.0542265	0.0236097	0	0	0.0676123	0	0	0.159323	1.01964	Low-fibrotic
TCGA-A8-A07C	0.0624542	0	0.0910947	0.109645	0	0.157579	0.0866401	0.0460318	0.0126149	0.0090049	0.0116943	0	0	0.12352	0.0712051	0.165058	0.00657478	0.0300673	0.0121745	0	0	0.00464123	0	0.497253	0.870699	Low-fibrotic
TCGA-D8-A1JM	0.0150049	0	0.020114	0.185529	0	0.199406	0.0600338	0.0670749	0.0202055	0.0152573	0	0.0655722	0	0.0645785	0.101512	0.0848792	0	0.0223947	0.0784388	0	0	0	0	0.31792	0.960905	Low-fibrotic
TCGA-AC-A62X	0.0242129	0	0.0402802	0.0358127	0	0.0525298	0.0488957	0.0985879	0	0	0	0.0144218	0.0462186	0.180541	0.0542956	0.0918127	0	0.279311	0.0237706	0	0	0.00930985	0	0.237586	0.99913	Low-fibrotic
TCGA-AQ-A04J	0.154643	0	0.0692889	0.124666	0	0.145847	0.0770322	0	0.0472108	0.0145619	0	0	0.0207596	0.0527319	0.0661824	0.0883869	0.0556865	0.0389179	0.0409937	0	0	0.0030906	0	0.592304	0.824525	Low-fibrotic
TCGA-E2-A1LI	0.0194207	0.0840457	0.0490772	0.125509	0	0.0900605	0.0542847	0.0451135	0.0041222	0.0449536	0	0.0220152	0.0673965	0.136635	0.136446	0.0796001	0.0155468	0.0117071	0	0.0140664	0	0	0	0.500654	0.867173	Low-fibrotic
TCGA-AC-A2FB	0.0869048	0.00532168	0.0248538	0.121243	0	0.144728	0.0621262	0.0335346	0	0.0491606	0	0.0281305	0.0285884	0.038502	0.0630124	0.119912	0	0.0538948	0.140087	0	0	0	0	0.582467	0.831868	Low-fibrotic
TCGA-A7-A0CE	0.0119649	0	0.120331	0.176328	0	0.0329982	0.0632576	0	0.0432628	0	0.027507	0.0163363	0.0227928	0.123447	0.117328	0.170359	0	0.0119936	0.0616	0	0	0.000493713	0	0.36678	0.930942	Low-fibrotic
TCGA-AN-A0XU	0.000783507	0.00240861	0.137677	0.183354	0	0.0247424	0.0050121	0.115098	0	0	0	0.102607	0.00558386	0.105879	0.101496	0.117446	0.0425067	0.0182961	0.0371092	0	0	0	0	0.464786	0.884734	Low-fibrotic
TCGA-B6-A0I1	0.0858606	0	0.192841	0	0	0.0526991	0	0.0211211	0.0317117	0.0272995	0.0141687	0	0	0.362148	0.114431	0.0441386	0	0	0.0535806	0	0	0	0	0.276973	0.989222	Low-fibrotic
TCGA-E2-A1B5	0.150907	0	0.056141	0.118483	0	0.209283	0.0703323	0.00339525	0.0343307	0.0160606	0	0.0208472	0.0219074	0.0380788	0.0878444	0.0912826	0.0100496	0.0102586	0.0607985	0	0	0	0	0.652541	0.787551	Low-fibrotic
TCGA-D8-A143	0.0423881	0.00181018	0.16631	0.163225	0	0.149371	0.0318075	0.0113838	0	0	0	0.0281946	0	0.0860039	0.086204	0.140985	0.0710868	0	0.0211428	0	0	8.66075e-05	0	0.474697	0.880412	Low-fibrotic
TCGA-A7-A5ZV	0.00365808	0.00784103	0	0.0104656	0	0.0352999	0	0.000859148	0.0187425	0.0187087	0.0368835	0	0.0320557	0.226433	0.028	0.347466	0.0756429	0.0336583	0.0819717	0	0	0.0423144	0	0.369597	0.937093	Low-fibrotic
TCGA-AR-A1AH	0.144996	0	0.0768466	0.0408616	0	0.220338	0	0.0237001	0.0068825	0	0.00153288	0	0.0428567	0.184886	0.0687128	0.139769	0.00693154	0.0132175	0	0.0198653	0.00501145	0.00359219	0	0.204397	1.00489	Low-fibrotic
TCGA-AR-A1AI	0.0353262	0	0.127281	0.133838	0	0.144642	0.0698439	0.0412891	0.00585714	0.00661377	0	0.023462	0.0260289	0.067851	0.0727931	0.144872	0.0217486	0.0396623	0.0305551	0	0	0.00833635	0	0.548043	0.847223	Low-fibrotic
TCGA-AO-A124	0.181966	0	0.0208445	0.0487969	0	0.194205	0	0.0676039	0	0	0.00473664	0.0203561	0.0421344	0.102428	0.0325619	0.0964625	0	0.152858	0	0.0350469	0	0	0	0.319667	0.953329	Low-fibrotic
TCGA-AN-A0AT	0.045414	0.00912678	0.0723367	0.198193	0	0.166463	0.0705078	0.0294403	0.00824212	0	0	0	0.000116318	0.105454	0.0819378	0.153773	0.0205932	0.0370688	0.00133243	0	0	0	0	0.464581	0.885158	Low-fibrotic
TCGA-AO-A12E	0.0810888	0	0.100104	0.0210196	0	0.191137	0	0.025528	0	0	0	0.00631391	0.107012	0.0379678	0.0501478	0.197442	0.0234544	0.0168369	0.141948	0	0	0	0	0.351224	0.936211	Low-fibrotic
TCGA-AR-A0U0	0.0463491	0	0.0775938	0.125615	0	0.0869972	0.0993329	0.0576626	0.0130858	0.0247978	0	0.0415022	0.0102563	0.0730876	0.117407	0.14444	0.0255383	0.0158293	0.0352879	0	0	0.00521769	0	0.547973	0.845421	Low-fibrotic
TCGA-AR-A1AP	0.0218674	0	0.0397191	0.0180476	0	0.189199	0	0.0413799	0.0202422	0.0169381	0	0.0194699	0.0124044	0.0882022	0.112489	0.213661	0.10932	0.0193245	0.0679027	0	0	0.00983227	0	0.440719	0.897387	Low-fibrotic
TCGA-AO-A1KO	0	0	0.196381	0.141254	0	0.270747	0	0.020126	0	0	0	0.00971116	0.017031	0.0018049	0	0.130643	0	0.128133	0.0802131	0	0.00395534	0	0	0.321049	0.954556	Low-fibrotic
TCGA-C8-A134	0.0150907	0.0649574	0.00812767	0.102159	0	0.0567038	0.100675	0.0431036	0.00329033	0.0476801	0	0.0160496	0.0298256	0.145684	0.118398	0.132044	0.0769016	0.0124118	0.0224298	0	0.00446787	0	0	0.565121	0.837986	Low-fibrotic
TCGA-OL-A6VO	0.0149614	0.00980093	0.0574424	0.133654	0	0.137525	0.00328896	0.0603932	0.0204057	0.00567535	0	0.0398795	0.0253095	0.166455	0.116523	0.160434	0.0165241	0.027433	0	0	0.00429484	0	0	0.446748	0.893797	Low-fibrotic
TCGA-C8-A26W	0.0293016	0.0913804	0.0896416	0.162881	0	0.0973797	0.0260322	0	0	0.0604577	0	0.00781316	0	0.0558195	0.120542	0.178826	0.00732137	0	0.0530994	0	0.0195046	0	0	0.482002	0.876841	Low-fibrotic
TCGA-AR-A1AJ	0.0937871	0	0.0286509	0.0984754	0	0.108051	0.0971977	0.0533817	0.00569149	0.0290274	0	0.0139652	0	0.0361446	0.0963791	0.171463	0.0757718	0.048074	0.032366	0	0	0.0115734	0	0.633416	0.807215	Low-fibrotic
TCGA-E2-A14R	0.0200669	0	0.160159	0.121663	0	0.117532	0.0614332	0.048962	0.0200365	0.00892847	0	0.0295632	0.012832	0.138242	0.0949814	0.0939412	0.0170712	0.0110337	0.0435554	0	0	0	0	0.548643	0.844336	Low-fibrotic
TCGA-A2-A1G6	0.0862353	0	0.0938335	0.184772	0	0.11241	0	0.0184569	0.028908	0.0137322	0	0.0146178	0.0226727	0	0.019616	0.168136	0.143863	0.0132519	0.0738976	0	0	0.00559761	0	0.391113	0.919607	Low-fibrotic
TCGA-A2-A3KD	0.0904241	0	0.146289	0.0373872	0	0.189767	0.0145277	0	0	0.000554278	0	0.049062	0.0123641	0.0382319	0.0703526	0.180826	0.0639201	0	0.101092	0	0	0.00520178	0	0.363242	0.93176	Low-fibrotic
TCGA-E9-A22G	0.00715209	0	0.0288108	0.118155	0	0.0706621	0.0331742	0.112099	0.0079632	0.0251424	0	0.00379572	0.01682	0.135426	0.0924564	0.122399	0.0716598	0.15062	0	0	0	0.0036645	0	0.405971	0.914166	Low-fibrotic
TCGA-D8-A147	0.121713	0	0.0727608	0.102612	0	0.217711	0.0471169	0	0.0125331	0	0	0	0.0279932	0.119683	0.0733449	0.102617	0.00610688	0.0359781	0.0534023	0	0.00642752	0	0	0.459999	0.888385	Low-fibrotic
TCGA-C8-A1HI	0.00200566	0	0.228472	0.0154952	0	0.143169	0	0.0228896	0	0.0410859	0	0.0228167	0	0.0699992	0.0897097	0.211628	0.0395615	0	0.113167	0	0	0	0	0.404033	0.914393	Low-fibrotic
TCGA-AO-A0J6	0.0161174	0	0.031991	0.148565	0	0.0449148	0.0459822	0.14211	0.012722	0	0	0.136071	0.0169272	0.093396	0.0837194	0.0645802	0	0.0937478	0.0402277	0	0	0.0289291	0	0.442957	0.896255	Low-fibrotic
TCGA-AO-A0J2	0.0864387	0	0.0910051	0.129617	0	0.101348	0.0695611	0.0681734	0.00496294	0	0.000136024	0.0427513	0	0.086663	0.0887291	0.12519	0.0322859	0.00592246	0.0580799	0	0	0.00913537	0	0.458405	0.889219	Low-fibrotic
TCGA-E2-A1L6	0.054886	0.00827059	0.0612194	0.0580281	0	0.170124	0	0.0434925	0	0.0349369	0	0	0	0.189064	0.0878538	0.202002	0.00935648	0	0.074545	0	0	0.00622021	0	0.383675	0.923487	Low-fibrotic
TCGA-AC-A2FG	0	0.0261041	0.183308	0.0629235	0	0.210333	0.000248774	0	0	0.0404161	0	0	0.019866	0.116402	0.0538903	0.0953498	0.0626304	0	0.128528	0	0	0	0	0.384703	0.922784	Low-fibrotic
TCGA-BH-A0E1	0.0619879	0	0.114827	0.0218769	0	0.146576	0	0.0187705	0	0	0.0247015	0	0	0.279809	0.0454015	0.184672	0.0125362	0	0.0888422	0	0	0	0	0.366394	0.93347	Low-fibrotic
TCGA-E9-A227	0.0451335	0	0.0729178	0.139116	0	0.163954	0.0495295	0.00611144	0.00166345	0.0367668	0	0.00205579	0.0248997	0	0.060054	0.165509	0.127916	0.0319303	0.0724443	0	0	0	0	0.524086	0.862256	Low-fibrotic
TCGA-S3-AA0Z	0.0160053	0.01999	0.122305	0.179622	0	0.0569665	0.0275124	0.106734	0	0	0	0.0390913	0.0539458	0.071578	0.103011	0.1488	0.0456105	0.000271257	0.00456212	0	0	0.00399472	0	0.460043	0.887649	Low-fibrotic
TCGA-E9-A1ND	0	0.00719071	0.0948931	0.138652	0	0.11062	0.08892	0.0474355	0.0270393	0.00448109	0	0.0345475	0.0820223	0.068807	0.086438	0.141914	0	0.0401029	0.0115512	0	0	0.015386	0	0.550712	0.845499	Low-fibrotic
TCGA-AO-A128	0	0.0656838	0.0416806	0.153602	0	0.117736	0.0453046	0.0609261	0.00401045	0.0351642	0	0.0872571	0.00597942	0.0392363	0.089637	0.155497	0	0.0451467	0.0459619	0	0	0.00717805	0	0.59361	0.817439	Low-fibrotic
TCGA-BH-A0RX	0	0.120188	0.061793	0.183146	0	0.0147586	0.0684879	0.0559403	0.018283	0.00840504	0	0.0465601	0.0262871	0.0589836	0.0812055	0.122583	0.0201623	0.0511715	0.0607291	0	0	0.00131646	0	0.614309	0.814832	Low-fibrotic
TCGA-BH-A18Q	0.0114454	0	0.0565237	0.155137	0	0.120568	0	0.0764622	0	0	0	0.0696805	0.0583233	0.0682769	0.105419	0.113154	0.0411544	0.0342205	0.0764499	0	0.0131854	0	0	0.395305	0.917963	Low-fibrotic
TCGA-A2-A04T	0.0460832	0	0.125434	0.194083	0	0	0.13194	0.073515	0	0.0373311	0	0.0221757	0	0.0539444	0.0912834	0.152117	0.0438946	0.0208535	0	0	0.00549454	0.0018504	0	0.573653	0.831589	Low-fibrotic
TCGA-BH-A0BA	0.102607	0	0.159392	0.124042	0	0.173548	0	0.0122798	0	0	0	0.0342542	0.0156141	0.00822276	0.0672138	0.0927957	0.0816701	0	0.128361	0	0	0	0	0.472762	0.881616	Low-fibrotic
TCGA-E2-A158	0.0815657	0	0.0873502	0.14602	0	0.0475755	0.029525	0.126252	0	0	0	0.0273441	0.0208008	0.0761846	0.126033	0.105754	0.0770408	0.0139208	0.0346338	0	0	0	0	0.243785	0.985526	Low-fibrotic
TCGA-A2-A0SX	0.0557832	0.00584404	0.0956511	0.0965544	0	0.192894	0.0478994	0.0670942	0.0158302	0.0232052	0	0.0217256	0.0209951	0.08432	0.0817827	0.0998916	0.0378935	0.0410345	0.0116014	0	0	0	0	0.583401	0.826618	Low-fibrotic
TCGA-AR-A1AQ	0.00704853	0.0747693	0.124644	0.0864796	0	0.0732417	0.12524	0.0254334	0.0168106	0.0381573	0	0.0334698	0.0144876	0.0674905	0.0736374	0.113601	0.0463182	0.038771	0.0404	0	0	0	0	0.600037	0.824408	Low-fibrotic
TCGA-A7-A6VY	0.00278382	0.0270807	0.160299	0.122858	0	0	0.0443495	0.118947	0	0.0172492	0	0.0571152	0	0.0903712	0.0930978	0.151013	0.0713143	0.0179185	0.0256033	0	0	0	0	0.567384	0.835104	Low-fibrotic
TCGA-A2-A3XX	0.133569	0.000302502	0.107323	0.0850621	0	0.0623906	0.0123578	0.115144	0	0	0	0.0453638	0.0116921	0.116247	0.0876556	0.176701	0	0.00766019	0.0385311	0	0	0	0	0.515007	0.860417	Low-fibrotic
TCGA-AC-A8OS	0.0143458	0.0719735	0.0767315	0.177772	0	0.120703	0.0166419	0	0.0106647	0.072043	0	0	0.0288199	0.0635274	0.0730867	0.0987417	0.0151057	0	0.159843	0	0	0	0	0.459116	0.888937	Low-fibrotic
TCGA-OL-A5RY	0.119095	0	0.0849075	0.134289	0	0.0905904	0.0610326	0.0312852	0	0.0280324	0	0.0233563	0.00929234	0.003716	0.0645286	0.158676	0.106413	0.0143823	0.070403	0	0	0	0	0.642039	0.804928	Low-fibrotic
TCGA-XX-A899	0.14217	0	0.0448733	0.101312	0	0.154644	0.0326304	0	0.00747248	0	0	0.0135438	0.0176951	0.0769577	0.0611347	0.127138	0.0221822	0.0371714	0.159578	0	0	0.0014968	0	0.56788	0.840799	Low-fibrotic
TCGA-AC-A5XS	0.0239432	0.0749787	0.0940076	0.0689417	0	0.150289	0.00642937	0	0.0597847	0.0223393	0	0.0429743	0	0	0.0831951	0.236546	0.00596343	0	0.120653	0	0	0.00995544	0	0.534606	0.854057	Low-fibrotic
TCGA-E9-A5FL	0.0222404	0.002996	0	0.0566106	0	0.205729	0	0	0.00746158	0.00316987	0	0.042412	0.0349691	0.0692329	0.0342586	0.350541	0.106918	0.0388689	0.0219786	0	0	0.00261332	0	0.378838	0.926477	Low-fibrotic
TCGA-GM-A2DN	0	0.0346316	0.117882	0.14485	0	0.15491	0.0325043	0.0158897	0.0365253	0.0127987	0	0.015609	0.0263466	0.0667258	0.0923799	0.0849876	0.104427	0.0129028	0.04663	0	0	0	0	0.573939	0.834827	Low-fibrotic
TCGA-A2-A04Q	0.0556876	0.00178445	0.111777	0.145276	0	0.112487	0.0483075	0.042518	0.0160155	0	0	0.0362303	0.0285803	0.0410978	0.0828893	0.124129	0.0788767	0.031322	0.0430211	0	0	0	0	0.660343	0.792777	Low-fibrotic
TCGA-OL-A5S0	0.0560871	0	0.054737	0.114521	0	0.122943	0.0141642	0.0384212	0.00658655	0	0	0.055138	0.038219	0.0781732	0.105801	0.173517	0.0617929	0.0202372	0.0596623	0	0	0	0	0.525596	0.858346	Low-fibrotic
TCGA-OL-A5RV	0.131131	0	0.155045	0.10492	0	0.102428	0	0.0353115	0.0139393	0	0	0.000867973	0	0.0158668	0.0478482	0.11206	0.122093	0	0.149923	0	0	0.00856683	0	0.349003	0.939034	Low-fibrotic
TCGA-E2-A1B6	0.135648	0.00363973	0.0583411	0.13473	0	0.12572	0.0970474	0.0155895	0.0763795	0.0210302	0	0.00515882	0.0177713	0.0572918	0.0975237	0.0900291	0.0228547	0.0323158	0.00893009	0	0	0	0	0.672995	0.774964	Low-fibrotic
TCGA-AR-A5QP	0.0616831	0	0.1569	0.055638	0	0.232827	0	0	0	0.0438917	0	0.0125825	0.0227667	0.0809396	0.0627233	0.190969	0.0126414	0	0.0664379	0	0	0	0	0.450531	0.892673	Low-fibrotic
TCGA-BH-A42V	0.0192443	0.0361797	0.104199	0.161703	0	0.0783881	0	0.0531125	0.0137947	0.0222799	0	0.0430852	0.0366681	0.0329392	0.0601368	0.131401	0.0870842	0.0143262	0.105458	0	0	0	0	0.465493	0.887255	Low-fibrotic
TCGA-5L-AAT1	0.0486657	0	0.0812439	0.219627	0	0.0733885	0.042475	0.0264644	0.0440444	0	0	0.0432051	0.0155684	0.0100095	0.0924502	0.146222	0.0587269	0	0.0979091	0	0	0	0	0.56486	0.837817	Low-fibrotic
TCGA-WT-AB44	0.055593	0	0.115333	0.0563277	0	0.163339	0	0.037555	0	0.0137489	0	0	0.00158137	0.185619	0.0468241	0.146433	0.00665939	0.00162818	0.168691	0	0	0.00066756	0	0.329842	0.946967	Low-fibrotic
TCGA-AC-A3BB	0.101738	0	0.0968032	0.169057	0	0.131087	0.0165659	0.0355412	0.0347331	0	0	0.0251688	0.0208008	0	0.0669043	0.13168	0.0779986	0.018127	0.0737947	0	0	0	0	0.566828	0.837043	Low-fibrotic
TCGA-LD-A7W6	0.0337086	0	0.174186	0.122421	0	0.137292	0	0.037371	0	0.0434716	0	0.0383555	0.00999687	0	0.0794783	0.156588	0.00670902	0.0269349	0.133487	0	0	0	0	0.41226	0.910337	Low-fibrotic
TCGA-A2-A3XS	0.0803524	0.0647197	0.0756754	0.0296894	0	0.17335	0	0.0569986	0	0.0761301	0	0.00607216	0	0.0566832	0.117804	0.210568	0.00994023	0.0084009	0.0327533	0	0.000862862	0	0	0.469427	0.882888	Low-fibrotic
TCGA-PE-A5DE	0.0723904	0	0.110454	0.274478	0	0.0585878	0.0376616	0.0471538	0.0208223	0	0	0.0335491	0.0275245	0.0435302	0.107756	0.108202	0.0370773	0	0.0205213	0	0	0.000292161	0	0.624823	0.798344	Low-fibrotic
TCGA-A2-A0CO	0.136317	0	0.0538435	0.158578	0	0.148385	0.00557375	0.0577145	0.0319695	0	0	0.0357643	0.0295752	0.0309537	0.0916991	0.143666	0.00605858	0.0354429	0.0344592	0	0	0	0	0.543977	0.844419	Low-fibrotic
TCGA-AC-A3QP	0.0446617	0	0.129521	0.178257	0	0.0130963	0	0.0368985	0	0	0	0.0464176	0.130126	0	0.0583975	0.177621	0.0763904	0	0.108614	0	0	0	0	0.432029	0.902095	Low-fibrotic
TCGA-A7-A13H	0	0.0144154	0.12859	0.074867	0	0.158044	0.040927	0	0.0153364	0.0364469	0	0.0186279	0.0282607	0.114996	0.085141	0.150667	0.0553379	0	0.076686	0	0	0.00165702	0	0.567251	0.841122	Low-fibrotic
TCGA-AC-A3TM	0.0322538	0	0.154633	0.2782	0	0.0112836	0.0125336	0.0215845	0.00826774	0.0548597	0	0.00326675	0	0.0852732	0.0281212	0.16718	0.0425841	0	0.0999584	0	0	0	0	0.442844	0.895987	Low-fibrotic
TCGA-AO-A1KR	0.023508	0	0.11039	0.226386	0	0.0584123	0.0867561	0.0854962	0.0313348	0	0.00408891	0.0328672	0.00450079	0.057584	0.0992996	0.0769576	0.0299875	0.023801	0.0486302	0	0	0	0	0.350693	0.940155	Low-fibrotic
TCGA-AO-A0JB	0.0888302	0	0.131735	0.141997	0	0.0792425	0	0.0418648	0.0493011	0	0	0.0347468	0.0277458	0.06312	0.0537662	0.187966	0.00685611	0.0433336	0.0494938	0	0	0	0	0.431037	0.901581	Low-fibrotic
TCGA-AR-A2LH	0.101274	0	0.100343	0.158432	0	0.11397	0.0617051	0.0212395	0.0120756	0	0	0.0343859	0.039371	0.00187306	0.0617841	0.14504	0.0453494	0.0201911	0.0795782	0	0	0.00338858	0	0.563957	0.840904	Low-fibrotic
TCGA-A2-A3XW	0	0.00576167	0.029897	0.157492	0	0.0881193	0	0.00242803	0.0763068	0	0	0.0274977	0.0225462	0.0248852	0.0404834	0.198445	0.159376	0.0354932	0.109102	0	0	0.0221662	0	0.435484	0.900634	Low-fibrotic
TCGA-LL-A73Z	0.0819611	0	0.0916648	0.114804	0	0.132403	0	0.0265105	0.0073305	0	0	0.0410847	0.0358376	0.051198	0.110061	0.163893	0.0129864	0.0252565	0.105009	0	0	0	0	0.535717	0.852886	Low-fibrotic
TCGA-EW-A6SB	0.00716179	0.0542532	0.157129	0.129816	0	0.0864162	0.0729305	0.0213785	0.0762444	0.0188218	0	0.06177	0	0.0474093	0.0651246	0.0827323	0.0706221	0.017137	0.0310527	0	0	0	0	0.600383	0.816303	Low-fibrotic
TCGA-E2-A1LA	0	0.0688968	0.0983793	0.190784	0	0.0736611	0.0457036	0.0433696	0.00597268	0	0	0.0387357	0.0179528	0.0592952	0.106442	0.115678	0.0577983	0	0.0773314	0	0	0	0	0.590152	0.826164	Low-fibrotic
TCGA-E9-A3QA	0.0511538	0.0627407	0.0700143	0.155571	0	0.0563861	0.114907	0.0617837	0.00604252	0	0.000701025	0	0.0103078	0.0623947	0.109126	0.129301	0.0336822	0.0705031	0	0	0	0.0053841	0	0.655932	0.788548	Low-fibrotic
TCGA-A2-A4RY	0.145036	0	0.0956823	0.125435	0	0.123476	0	0.0524663	0.014417	0	0	0.0258602	0.0398022	0.00697451	0.0550511	0.117432	0.0788741	0.0134738	0.106019	0	0	0	0	0.445744	0.895119	Low-fibrotic
TCGA-AN-A0FJ	0	0.0604017	0.023778	0.102392	0	0.179343	0	0	0.0124115	0	0.00774964	0.0559943	0.0577441	0.212343	0.0967592	0.113598	0.0748936	0	0.002592	0	0	0	0	0.337464	0.946087	Low-fibrotic
TCGA-B6-A0IJ	0	0.0839847	0.116774	0.0686982	0	0.144579	0.0344636	0.0468783	0.00139349	0.00940355	0	0.0435826	0.0411546	0.0947904	0.101963	0.108644	0.0659444	0.0157985	0.0219466	0	0	0	0	0.611586	0.81551	Low-fibrotic
TCGA-A8-A0A4	0	7.86603e-06	0.0718341	0.0888244	0	0.119433	0	0.0270647	0.0143724	0.00132559	0	0.0620079	0.0038758	0.0567869	0.0937216	0.188639	0.0552748	0	0.216832	0	0	0	0	0.278376	0.967912	Low-fibrotic
TCGA-AQ-A54N	0	0.0137273	0.0670564	0.183522	0	0.111807	0	0.167003	0.0213823	0	0	0.0448867	0.0574324	0.067359	0.0692648	0.160935	0	0.0176967	0.0179269	0	0	0	0	0.156698	1.02974	Low-fibrotic
TCGA-LD-A74U	0.120392	0	0.105644	0	0	0.165631	0	0	0.0127783	0.00548065	0.0192032	0.0034166	0	0.145122	0.0698865	0.208078	0.02588	0	0.118488	0	0	0	0	0.488263	0.875227	Low-fibrotic
TCGA-B6-A401	0.0829854	0.0180503	0.0457742	0.0560147	0	0.0994228	0.00398416	0.0747105	0	0.128259	0	0.00842409	0	0.19416	0.0462551	0.134751	0.0118394	0.0215182	0.0738504	0	0	0	0	0.481309	0.878166	Low-fibrotic
TCGA-PL-A8LV	0.0275478	0.0922194	0.135833	0.136016	0	0.113521	0.00925911	0.0371064	0	0	0	0.0505285	0.0150014	0.100872	0.121341	0.0985406	0.0302453	0	0.0295928	0	0.00237521	0	0	0.554605	0.838156	Low-fibrotic
TCGA-OK-A5Q2	0.188253	0	0.030379	0.102377	0	0.245204	0	0.0177856	0	0.0224455	0	0.0119809	0	0.0462959	0.0699555	0.10428	0.0538143	0	0.0967281	0	0	0.0105003	0	0.524911	0.855747	Low-fibrotic
TCGA-GM-A3XL	0.018245	0	0.136485	0.187213	0	0.0528515	0.0892998	0.0478615	0	0	0.0233596	0.0185326	0.0215022	0.0276371	0.0778854	0.142784	0.0699629	0.0317607	0.0428194	0	0	0.0118008	0	0.570256	0.838019	Low-fibrotic
TCGA-W8-A86G	0.132914	0	0.135339	0.114745	0	0.00887607	0	0.0539418	0.0384115	0	0	0.0441251	0.0815697	0	0.0287094	0.203892	0.0179239	0.00154629	0.138006	0	0	0	0	0.212639	0.996894	Low-fibrotic
TCGA-BH-A0HK	0.0833099	0	0.18503	0.0815391	0	0.192635	0	0.0214009	0.0103046	0.0126552	0	0.00490362	0.0604442	0	0.0775139	0.148249	0.0767499	0.00299919	0.0413604	0	0.000905824	0	0	0.402397	0.915084	Low-fibrotic
TCGA-BH-A42U	0.0903761	0.0297308	0.10834	0.191557	0	0.0742187	0	0.0782763	0.0139664	0.00294333	0	0.0387503	0.015956	0.0643772	0.0874738	0.130691	0.0314924	0	0.0341473	0.00770256	0	0	0	0.535617	0.849164	Low-fibrotic
TCGA-Z7-A8R5	0.105708	0	0.0770888	0.209815	0	0.010951	0.00152137	0.0588623	0	0	0	0.048587	0.0726761	0.101545	0.0220193	0.177504	0.028038	0	0.0856848	0	0	0	0	0.531753	0.855761	Low-fibrotic
TCGA-A2-A3XZ	0.188615	0	0.0929513	0.0823856	0	0.153149	0.0460212	0.0257331	0.0480863	0	0	0.00796155	0	0.0143686	0.0615836	0.148088	0.0845402	0.00883803	0.0376783	0	0	0	0	0.617584	0.807819	Low-fibrotic
TCGA-LL-A6FR	0	0.0101847	0.0258414	0.0407669	0	0.0771328	0	0.0147544	0.0571637	0	0	0	0.00952356	0.388072	0	0.193068	0	0.0656195	0.100611	0	0	0.0172622	0	0.313109	0.969636	Low-fibrotic
TCGA-AR-A5QM	0.0235467	0	0.154799	0.0890215	0	0.10814	0	0.0104957	0.0110614	0.0646771	0	0.00429406	0	0.144352	0.0621834	0.122201	0.0302761	0	0.171354	0	0	0.00359809	0	0.495081	0.872645	Low-fibrotic
TCGA-AN-A0AR	0.0457785	0	0.0221708	0.104722	0	0.160158	0	0.0375501	0.041481	0	0	0.0204573	0.0105751	0.112367	0.0827125	0.205727	0.102168	0	0.0541321	0	0	0	0	0.183523	1.00829	Low-fibrotic
TCGA-E2-A1IF	0.04078	0	0.130436	0.181555	0	0.129147	0	0.012856	0.0205893	0	0	0	0.0311527	0.180413	0.0890633	0.107087	0.0146099	0	0.0623105	0	0	0	0	0.432731	0.900739	Low-fibrotic
TCGA-AO-A03R	0.085809	0.00400698	0.0876963	0.1905	0	0.132	0.0192005	0.00190865	0	0.0490451	0	0.0277778	0	0.0369991	0.105156	0.182557	0.0248942	0	0.0524486	0	0	0	0	0.558247	0.837776	Low-fibrotic
TCGA-E9-A6HE	0	0.00339474	0.075727	0.126227	0	0.101358	0	0.0898133	0.011565	0	0	0.0596624	0.0573513	0.138851	0.0524818	0.160214	0.00211005	0.0275501	0.0896308	0	0	0.0040639	0	0.3738	0.927196	Low-fibrotic
TCGA-AR-A0TU	0.0246121	0	0.0111845	0.171931	0	0.00821756	0.0769081	0.117635	0	0.0436257	0	0.0805528	0	0.0409742	0.0894446	0.189281	0.05475	0.0820764	0	0	0.00787469	0.000933194	0	0.522918	0.854215	Low-fibrotic
TCGA-PL-A8LY	0.056685	0	0.119021	0.187885	0	0.122147	0	0.0440783	0.0421123	0	0.00369683	0.0268123	0.0389211	0.101234	0.0114666	0.171042	0.0211243	0.0274323	0.0263422	0	0	0	0	0.304275	0.959574	Low-fibrotic
TCGA-B6-A3ZX	0.178189	0	0.0393379	0.172001	0	0.0812851	0.0302397	0.0816992	0.0445726	0.0266861	0	0.0398771	0	0.0555484	0.0720466	0.101825	0.0336023	0.00633353	0.0367567	0	0	0	0	0.617325	0.803135	Low-fibrotic
TCGA-GM-A2DB	0.117491	0.0109708	0.0954111	0.139236	0	0.102955	0.0573499	0.040861	0.0215228	0	0	0.0046166	0	0.109165	0.0964526	0.0724163	0.0796552	0.0231189	0.0287765	0	0	0	0	0.545738	0.846113	Low-fibrotic
TCGA-AC-A2FK	0.0627309	0	0.13001	0.161423	0	0.154127	0	0.0325562	0	0	0	0.0207593	0.0233845	0.0595999	0.0685941	0.136252	0.0611988	0	0.0893653	0	0	0	0	0.416615	0.908318	Low-fibrotic
TCGA-AC-A3W7	0.000235455	0.0238741	0.0857295	0.225263	0	0.0698423	0	0	0.00200197	0.0844437	0	0	0.00768772	0.145034	0.0599641	0.14127	0.0286828	0	0.125972	0	0	0	0	0.281066	0.96856	Low-fibrotic
TCGA-A2-A3XT	0.0093717	0.00933285	0.0688636	0.0848695	0	0.215518	0.0337809	0	0.0134275	0	0	0.0313086	0.0168274	0.118298	0.116266	0.143616	0.0940505	0.0102982	0.020792	0	0.00838049	0.00499782	0	0.537873	0.850705	Low-fibrotic
TCGA-A7-A5ZX	0.0456705	0	0.175828	0.0594894	0	0.141598	0	0	0	0	0	0.00321169	0	0.0742702	0.0576899	0.192773	0.0312578	0	0.218212	0	0	0	0	0.362882	0.933045	Low-fibrotic
TCGA-OL-A5D7	0.0699299	0.00100882	0.0996697	0.185394	0	0.0858856	0.0747486	0.0514908	0.0471361	0	0	0.0129576	0.0268576	0.0579826	0.0819649	0.141145	0.00316042	0.0351702	0.0254982	0	0	0	0	0.549563	0.843929	Low-fibrotic
TCGA-D8-A3Z5	0.0366039	0	0.288597	0.185638	0	0.0844959	0	0.039682	0.0280822	0	0.010519	0.0273777	0.0199381	0	0.0770465	0.155205	0.0318416	0	0	0.0149737	0	0	0	0.341732	0.953037	Low-fibrotic
TCGA-A7-A425	0.0332384	0	0.094187	0.113065	0	0.171094	0	0.0219762	0.00291354	0	0	0.0204072	0.105163	0	0.0537639	0.220768	0.0526763	0.0106325	0.0952287	0	0	0.00488574	0	0.358277	0.933192	Low-fibrotic
TCGA-GM-A3NY	0.0890038	0	0.226594	0.0833225	0	0.113316	0.0174852	0	0	0.10092	0	0	0	0.055802	0.10992	0.107122	0.0116825	0	0.0848327	0	0	0	0	0.395984	0.920504	Low-fibrotic
TCGA-BH-A0E6	0.0923018	0.0669519	0.106097	0.287595	0	0	0.0337533	0.0376774	0.01894	0.0182336	0	0	0	0.138303	0.0724963	0.101379	0	0.0115956	0.0146771	0	0	0	0	0.48228	0.875388	Low-fibrotic
TCGA-BH-A42T	0.053858	0	0.0468458	0.124009	0	0.139658	0	0.118021	0.00949086	0.00106241	0	0.0185517	0.0996212	0	0.0584767	0.140268	0.0664559	0.0331251	0	0.0532204	0.0373359	0	0	0.343643	0.940028	Low-fibrotic
TCGA-BH-A0B9	0.0391103	0.0544345	0.0274474	0.177769	0	0.0674474	0.119337	0.0291276	0.0106725	0	0	0.0495833	0.0190631	0.081864	0.0934507	0.104825	0.05559	0.0139288	0.0563487	0	0	0	0	0.544742	0.849064	Low-fibrotic
TCGA-BH-A0BS	0.138707	0	0.180521	0.130427	0	0.225521	0.0117405	0.019135	0	0	0.0155354	0.000466906	0.0104818	0.0789556	0.0316352	0.132779	0.0161943	0.00790042	0	0	0	0	0	0.429563	0.903557	Low-fibrotic
TCGA-BH-A2L8	0.0495547	0.00990395	0.0664714	0.196025	0	0.0954693	0.0305867	0.0291863	0.0322953	0.00372799	0	0.0467034	0.0333601	0.0258356	0.0814133	0.120465	0.0675311	0	0.111471	0	0	0	0	0.5939	0.825656	Low-fibrotic
TCGA-EW-A1IZ	0.0561558	0.0165681	0.0914409	0.260668	0	0.0457777	0.0851662	0.06647	0	0.0111824	0	0.0574215	0.00557624	0.034487	0.0873466	0.11496	0.00960833	0	0.0571707	0	0	0	0	0.612288	0.806116	Low-fibrotic
TCGA-A7-A4SA	0.0597465	0	0.0748721	0.180659	0	0.12382	0.0168862	0.0509421	0.0329669	0	0	0.0198942	0.0158226	0.0121539	0.094318	0.135022	0.0565373	0.0214577	0.104902	0	0	0	0	0.518913	0.860545	Low-fibrotic
TCGA-EW-A3U0	0.0757781	0	0.073813	0.166526	0	0.081394	0.058757	0.0408368	0.0204673	0	0	0.0508745	0.0307129	0.0677276	0.0887759	0.11832	0.0656966	0.004441	0.0558795	0	0	0	0	0.631371	0.807165	Low-fibrotic
TCGA-A2-A4S2	0.0473191	0	0.0511799	0.20572	0	0.0901098	0.0570602	0.0450732	0	0	0	0.0557643	0.0291086	0.0711724	0.0690161	0.130284	0.0133223	0.0404485	0.093899	0	0	0.000522593	0	0.455752	0.890404	Low-fibrotic
TCGA-BH-A0DL	0.0431938	0	0.0540835	0.0586478	0	0.187816	0.051647	0.0519165	0	0	0	0.0333396	0.0286097	0.0617083	0.0965181	0.130393	0.134501	0.0583843	0	0	0	0.00924189	0	0.568407	0.837308	Low-fibrotic
TCGA-D8-A1JB	0.0988873	0.0112385	0.0541347	0.180755	0	0.0431358	0.0744032	0.0661172	0	0.0421655	0	0.027895	0.0186353	0.0497646	0.0942907	0.111942	0.0283106	0	0.0983251	0	0	0	0	0.578251	0.831808	Low-fibrotic
TCGA-GM-A3XG	0.0810394	0	0.156944	0.0719193	0	0.0994777	0	0.050707	0.0256009	0.0197051	0	0	0	0.132936	0.0635926	0.209056	0.0239792	0.0181547	0.0468876	0	0	0	0	0.298983	0.962133	Low-fibrotic
TCGA-OL-A6VR	0.0595693	0	0.222707	0	0	0.135708	0	0.00828752	0	0.0289289	0	0.0105471	0	0.224299	0.0356977	0.209866	0.0107792	0	0.0536096	0	0	0	0	0.351973	0.943569	Low-fibrotic
TCGA-LL-A441	0.19911	0	0.0352943	0.10677	0	0.155751	0.0497979	0.0562354	0.029845	0	0	0.0150792	0.0176389	0.0846795	0.0708006	0.0728479	0.015907	0.0232842	0.0669585	0	0	0	0	0.609898	0.811656	Low-fibrotic
TCGA-E2-A1II	0.0315495	0.0531775	0.0422154	0.192486	0	0.0467704	0.164189	0.0128517	0.0175259	0.0385313	0	0.0425781	0.00240842	0.0327524	0.100568	0.148221	0.00371954	0.0354363	0.0289471	0	0	0.00607254	0	0.607864	0.812095	Low-fibrotic
TCGA-A2-A0ST	0.14439	0	0.0629177	0.117372	0	0.0994216	0.0264045	0.0797478	0.0237314	0.018113	0	0.0492511	0	0.0343852	0.0653594	0.0952316	0.0927757	0.0578767	0.0318127	0	0	0.00120976	0	0.657559	0.788195	Low-fibrotic
TCGA-OL-A66P	0	0.0957389	0.133848	0.241837	0	0.039312	0.00698247	0.0488191	0	0	0	0.0674775	0	0.028571	0.0585886	0.153317	0.0346871	0	0.0879102	0	0	0.00291059	0	0.645319	0.791502	Low-fibrotic
TCGA-C8-A8HR	0.0647783	0	0.0422797	0.171502	0	0.155877	0	0.07965	0	0	0	0.073785	0.0293991	0	0.104674	0.182423	0.0147195	0.0204322	0.0598587	0	0	0.000621451	0	0.47739	0.878465	Low-fibrotic
TCGA-E2-A573	0.0505138	0	0.127365	0.113833	0	0.118633	0.0572523	0.0675293	0.0064898	0.0146931	0	0.0220739	0.0133454	0.091833	0.0774027	0.136208	0.0215517	0.0379419	0.0372093	0	0	0.00612491	0	0.600536	0.821157	Low-fibrotic
TCGA-GM-A4E0	0.015208	0	0.0786504	0.216065	0	0.121934	0.0169237	0.00212996	0	0	0	0.0753481	0.0302154	0	0.102657	0.23787	0.0121374	0	0.0908605	0	0	0	0	0.463912	0.885599	Low-fibrotic
TCGA-EW-A2FS	0.0304204	0.0557142	0.116837	0.136679	0	0.199413	0	0.0601876	0	0.0606234	0	0.0408178	0	0.0356562	0.0808428	0.117517	0.0565606	0	0.00873111	0	0	0	0	0.460593	0.886755	Low-fibrotic
TCGA-GM-A3XN	0.075427	0	0.150523	0.107121	0	0.173462	0.010221	0	0.0242403	0.0228249	0	0.00752752	0.0118745	0.114214	0.107684	0.107116	0.00457254	0	0.0831907	0	0	0	0	0.509236	0.863274	Low-fibrotic
TCGA-E9-A2JT	0.220616	0	0.0359606	0.174227	0	0.10448	0.0786291	0.0295071	0.0163644	0.0103424	0	0.0157047	0.0146671	0.0177769	0.0754451	0.110274	0.00554723	0.0142539	0.0762045	0	0	0	0	0.644286	0.789791	Low-fibrotic
TCGA-AR-A1AK	0.0548524	0	0.0283765	0.154906	0	0.11278	0.0344397	0.0131966	0	0	0	0.060431	0.0171915	0.0373754	0.10317	0.198922	0.0054899	0.0368349	0.1271	0	0.00656127	0.00837348	0	0.496433	0.871317	Low-fibrotic
TCGA-E2-A14Q	0.0339538	0	0.107952	0.114247	0	0.215622	0	0.033215	0	0.0684334	0	0.0286216	0.0139051	0.0361067	0.0855721	0.118561	0.0229542	0.0153488	0.105507	0	0	0	0	0.353265	0.937378	Low-fibrotic
TCGA-E2-A1IK	0	0.126201	0.0575146	0.170135	0	0.0781566	0.0266085	0.0419641	0.0243977	0.00296759	0	0.0323439	0.00834313	0.0843357	0.099538	0.17149	0.0115155	0	0.0644889	0	0	0	0	0.492047	0.872948	Low-fibrotic
TCGA-BH-A28O	0.0517083	0	0.189912	0.106829	0	0.28511	0	0	0	0	0	0.0206924	0.00307866	0	0.072979	0.163801	0.000613203	0.0263988	0.0788781	0	0	0	0	0.413862	0.910249	Low-fibrotic
TCGA-BH-A0W5	0.125759	0.00262648	0.0655469	0.123812	0	0.200254	0.0640701	0.031081	0.00561966	0.00421763	0	0	0.00629446	0.0697179	0.0786229	0.107112	0.010174	0.00337405	0.101718	0	0	0	0	0.613527	0.81342	Low-fibrotic
TCGA-PE-A5DC	0.00197562	0.0210003	0.0125451	0.0745586	0	0.222162	0	0	0	0.0816814	0	0	0.0125437	0.137183	0.150401	0.161793	0.0141463	0	0.11001	0	0	0	0	0.331322	0.949734	Low-fibrotic
TCGA-AN-A0FL	0.0310546	0	0.0356622	0.0431614	0	0.19508	0	0.0124432	0	0	0	0.000984399	0.0380299	0.29614	0.0852382	0.210605	0	0.0256498	0.0226511	0	0.00330089	0	0	0.295871	0.971613	Low-fibrotic
TCGA-B6-A0I2	0.0152996	0.0186777	0.122403	0.224617	0	0.0199602	0.022035	0.0925828	0.0161141	0	0	0.111888	0.0146192	0.0784102	0.104501	0.0944819	0.0273023	0	0.037108	0	0	0	0	0.597339	0.812107	Low-fibrotic
TCGA-GM-A3NW	0.0327202	0.0252518	0.078518	0.0906452	0	0.202103	0	0	0	0.0102284	0	0	0.00548787	0.0579656	0.147324	0.0981771	0.0375024	0	0.214076	0	0	0	0	0.374151	0.928118	Low-fibrotic
TCGA-OL-A66N	0.0150691	0.0716706	0.13517	0.118229	0	0.130683	0.0161962	0	0	0	0	0.0143948	0.0188203	0.0275605	0.0492272	0.178695	0.0333458	0	0.190939	0	0	0	0	0.492967	0.874506	Low-fibrotic
TCGA-A2-A04U	0.0673294	0	0.184365	0.123289	0	0.0709203	0.00831297	0.0436917	0.04335	0	0	0.0125661	0.00187437	0.18041	0.0310025	0.148887	0.0217871	0.0192295	0.042985	0	0	0	0	0.324144	0.952451	Low-fibrotic
TCGA-BH-A0H5	0.121389	0	0.0830065	0.177692	0	0.0787031	0.0470611	0.0340178	0.0143492	0.00305185	0	0.0560235	0.0257041	0.0473937	0.0885995	0.0930852	0.0624097	0	0.0675131	0	0	0	0	0.676763	0.779065	Low-fibrotic
TCGA-A7-A3J1	0.106085	0.0380694	0.0245561	0.14992	0	0.176267	0.0377143	0	0.00605676	0	0	0.0304296	0.0303438	0.0620925	0.101226	0.118961	0.0146521	0	0.103626	0	0	0	0	0.527385	0.856029	Low-fibrotic
TCGA-AO-A12A	0.125389	0	0.0666708	0.129712	0	0.163589	0	0.0449685	0.0342581	0.00967619	0	0.0258628	0.0343966	0.0110792	0.0635603	0.103101	0.0804135	0.0481012	0.0592227	0	0	0	0	0.36304	0.932335	Low-fibrotic
TCGA-E2-A14U	0.100867	0	0.103439	0.150009	0	0.172025	0	0.0455047	0	0	0	0.0192751	0.0306998	0.0285081	0.0526732	0.241567	0.0337609	0	0.0216714	0	0	0	0	0.241801	0.986649	Low-fibrotic
TCGA-LL-A5YO	0.130532	0	0.0592549	0.159798	0	0.0778065	0.0657773	0.0300366	0.00838644	0	0	0.0537347	0.0111192	0.0773448	0.088606	0.0927768	0.0574028	0.00581891	0.0816043	0	0	0	0	0.655986	0.793103	Low-fibrotic
TCGA-OL-A66L	0.0114716	0.0177294	0.0935436	0.178269	0	0.100974	0	0.030791	0.000141555	0.0294994	0	0.0707182	0.0334851	0.0162653	0.0678814	0.181458	0.0336814	0.012774	0.11311	0	0	0.0082069	0	0.470145	0.883782	Low-fibrotic
TCGA-OL-A66K	0.00120791	0.00360827	0.129593	0.126824	0	0.135163	0.00834527	0.037659	0	0	0	0	0.00880973	0.140864	0.0481237	0.206572	0	0	0.15323	0	0	0	0	0.294358	0.961732	Low-fibrotic
TCGA-E2-A1LG	0.00993528	0	0.18054	0.0979226	0	0.0458638	0.0158171	0.106125	0	0.0132184	0	0.0115458	0.0010145	0.121376	0.144881	0.130766	0.0729815	0.0245321	0.0234811	0	0	0	0	0.42929	0.902557	Low-fibrotic
TCGA-A7-A426	0.105371	0	0.136373	0.0760851	0	0.22488	0	0	0	0.0709457	0	7.38749e-05	0.0119125	0.00773719	0.0602521	0.120351	0.0125357	0	0.173483	0	0	0	0	0.415232	0.909037	Low-fibrotic
TCGA-A2-A0CR	0.0858813	0.00525252	0.0740858	0.23824	0	0.0342081	0.00937295	0.0815926	0.0385491	0	0	0.0622163	0.0220559	0.0475539	0.0708217	0.119085	0.0241483	0.00796147	0.0789744	0	0	0	0	0.632517	0.798622	Low-fibrotic
TCGA-C8-A12V	0.0312684	0.0629299	0.0559187	0.11445	0	0.123712	0.0809404	0.0172516	0.00697037	0.0371992	0	0.0547872	0.0106529	0.0691171	0.0820083	0.121616	0.0412791	0.0430277	0.0468706	0	0	0	0	0.627485	0.807944	Low-fibrotic
TCGA-E2-A574	0.0422747	0	0.0113155	0.0961972	0	0	0	0.0997601	0.0235982	0	0	0.0611066	0	0.308617	0.0116708	0.230265	0	0.104648	0.00356687	0	0.00698088	0	0	0.14805	1.04536	Low-fibrotic
TCGA-AR-A2LO	0.128218	0	0.0797755	0.153161	0	0.188226	0.000380829	0.0548904	0.0285156	0.00268366	0	0.0229124	0.0136426	0.0166072	0.0809245	0.0997207	0.0575478	0.0102166	0.0473038	0	0	0.0152731	0	0.52617	0.853862	Low-fibrotic
TCGA-A2-A3KC	0.0580137	0	0.0954334	0.0590838	0	0.195202	0	0.0275351	0.000789262	0	0	0.0107015	0.00836436	0.0649707	0.09371	0.175466	0.0928629	0	0.110286	0	0.0058329	0.00174916	0	0.420378	0.907093	Low-fibrotic
TCGA-D8-A4Z1	0.0861067	0	0.133176	0.145488	0	0.146736	0	0.0513821	0.010749	0	0.0130318	0.0192888	0.0416381	0	0.0549239	0.138986	0.0383046	0	0.120189	0	0	0	0	0.399536	0.916023	Low-fibrotic
TCGA-AR-A2LJ	0.0434136	0	0.0982776	0.120642	0	0.139541	0	0.0179604	0.0344708	0	0	0.0376197	0.0413096	0.102973	0.0591355	0.123734	0.0888066	0	0.0921155	0	0	0	0	0.575984	0.838144	Low-fibrotic
TCGA-A2-A0YK	0.149258	0	0.0604397	0.191019	0	0.135996	0.0230943	0.0446655	0	0.00489973	0	0.0333193	0.0176694	0.0216216	0.0776362	0.103976	0.0599839	0	0.0764213	0	0	0	0	0.576096	0.829431	Low-fibrotic
TCGA-OL-A5RW	0.000462041	0.0459362	0.116829	0.0347871	0	0.170257	0	0.0941255	0.0186427	0	0	0.0474944	0.0156318	0.0870023	0.0952813	0.187177	0	0.0800577	0.00183288	0	0	0.00448289	0	0.330361	0.948634	Low-fibrotic
TCGA-A2-A0D0	0.0599486	0	0.0191529	0.192286	0	0.124942	0.0922264	0.0536751	0.0184461	0	0	0.0352743	0.0240981	0.0636519	0.0855908	0.119397	0.10741	0	0.000640918	0	0	0.00325891	0	0.437348	0.898485	Low-fibrotic
TCGA-AO-A129	0.11068	0.00760789	0.100583	0.158246	0	0.0807454	0.0735428	0.0301899	0.00584578	0.016138	0	0.0455864	0.0163706	0.0811325	0.0949424	0.104343	0	0.0425812	0.0314655	0	0	0	0	0.577765	0.827746	Low-fibrotic
TCGA-BH-A0BM	0.116942	0	0.116037	0.124849	0	0.156162	0	0.0757433	0	0.00462729	0	0.0448677	0.00519693	0.0114639	0.0559896	0.151884	0.0343257	0.0169453	0.0821806	0	0	0.00278555	0	0.338057	0.944403	Low-fibrotic
TCGA-5L-AAT0	0.0373317	0.0238722	0.0985528	0.199603	0	0.0975951	0	0.0469192	0.0225873	0	0	0.0516605	0.0109262	0.0403224	0.0900071	0.134944	0.0225796	0	0.116146	0	0	0.00695269	0	0.493467	0.871862	Low-fibrotic
TCGA-B6-A0RT	0.148765	0	0.0563011	0.20871	0	0.0569682	0.10011	0.0442618	0.0124235	0.00225829	0	0.0387501	0.028169	0.0458317	0.085583	0.107624	0.00445366	0.0238956	0.0358955	0	0	0	0	0.670079	0.777626	Low-fibrotic
TCGA-A2-A25D	0.0665097	0	0.0511333	0.21758	0	0.0900546	0.045556	0.0239648	0.0283337	0	0	0.0174293	0.0187104	0.0200831	0.0890595	0.137342	0.0316965	0.038652	0.123895	0	0	0	0	0.568203	0.837245	Low-fibrotic
TCGA-OL-A5RU	0.1318	0.0304116	0.102697	0.118495	0	0.183892	0.00178502	0.0647709	0	0.0237819	0	0.00450563	0.0354286	0.0454668	0.0771714	0.123463	0.00206051	0	0.054271	0	0	0	0	0.565987	0.832622	Low-fibrotic
TCGA-D8-A73U	0.0174292	0.0399053	0.0941295	0.196535	0	0.117255	0.0364249	0.0374363	0.0156372	0	0	0.0373376	0.0272587	0.0862269	0.0734529	0.128133	0.00387373	0.00921855	0.0797468	0	0	0	0	0.58887	0.825879	Low-fibrotic
TCGA-LL-A8F5	0	0.0273274	0.194377	0.127083	0	0.010289	0.0428325	0.0764742	0.0143917	0.022329	0	0.0366897	0.000165164	0.134357	0.0828843	0.145509	0.02825	0.0119219	0.0451193	0	0	0	0	0.580635	0.826954	Low-fibrotic
TCGA-D8-A145	0.0432791	0	0.196545	0.111429	0	0.163632	0.00584734	0.0202838	0.00187038	0.0159896	0	0	0	0.0266827	0.0615107	0.141151	0.0883399	0	0.123439	0	0	0	0	0.480337	0.878675	Low-fibrotic
TCGA-AQ-A7U7	0.0633606	0.0118617	0.0758881	0.164884	0	0.103526	0.0298934	0.0965822	0.0176942	0.01844	0	0.0322913	0.0210147	0.0356649	0.0802115	0.12409	0	0.0285761	0.0960207	0	0	0	0	0.577901	0.829917	Low-fibrotic
TCGA-EW-A1PB	0.0517451	0	0.00444045	0.0820362	0	0.102745	0.0580057	0.0841408	0.00194861	0.034891	0	0.0639739	0.00173126	0.0253623	0.169138	0.248549	0.00323717	0.020949	0.0369489	0	0	0.0101576	0	0.588517	0.816874	Low-fibrotic
TCGA-AC-A62Y	0.0231376	0	0.0151988	0.0839015	0	0.159384	0.00783818	0.083379	0	0.00873285	0	0.0264685	0.0118525	0.117922	0.0748091	0.18813	0.0919859	0.0241001	0.0322782	0	0.032172	0.0187104	0	0.417716	0.90778	Low-fibrotic
TCGA-GM-A5PX	0.031287	0	0.0822969	0.0928019	0	0.260046	0	0	0	0.032929	0	0.0325407	0	0.0463466	0.0732272	0.16446	0.0136572	0	0.170408	0	0	0	0	0.355102	0.935755	Low-fibrotic
TCGA-B6-A0X0	0	0.0297108	0.0118417	0.0476179	0	0.2237	0	0	0	0.131209	0	0	0	0.287259	0.118	0.0202404	0.0677171	0	0.0627054	0	0	0	0	0.198524	1.01544	Low-fibrotic
TCGA-BH-A0EA	0.0190048	0.0169941	0.0851613	0.113483	0	0.134675	0	0	0	0.0632736	0	0.0354383	0.00427345	0.1291	0.0713264	0.128872	0.123722	0	0.0721116	0	0.0025645	0	0	0.379432	0.924686	Low-fibrotic
TCGA-E2-A1LH	0.0602657	0	0.128334	0.166265	0	0.0614248	0.0655086	0.044581	0.0337647	0.00864053	0	0.037908	0.0174097	0.0614518	0.0946706	0.131853	0.0409652	0	0.0469573	0	0	0	0	0.620557	0.809188	Low-fibrotic
TCGA-A2-A3XU	0.0107124	0	0.255103	0.113118	0	0	0	0.0695325	0.0208594	0	0	0.0332478	0	0.253563	0.0348597	0.140477	0.0616796	0	0.00471449	0	0.00213307	0	0	0.239662	1.00195	Low-fibrotic
TCGA-HN-A2NL	0.00849847	0.0723234	0.0981233	0.272165	0	0	0.0296648	0.0590443	0	0.0178503	0	0.032548	0	0.0539864	0.0893124	0.156771	0.0142903	0.0311997	0.059336	0	0.00488712	0	0	0.518577	0.858566	Low-fibrotic
TCGA-E9-A3X8	0.0507917	0	0.151357	0.227524	0	0.00143587	0.0257799	0.0101213	0.0232045	0.0579248	0	0.0470573	0.00471747	0.0458865	0.0662728	0.128135	0.0258247	0	0.133968	0	0	0	0	0.547501	0.844155	Low-fibrotic
TCGA-AO-A0JL	0.00740089	0	0.116423	0.135809	0	0.0114143	0.0357148	0.0772494	0	0.0156991	0	0.0463758	0	0.251571	0.0885594	0.173383	0	0	0.0395085	0	0	0.000892748	0	0.354432	0.938952	Low-fibrotic
TCGA-B6-A0RV	0.113801	0	0.100249	0.026387	0	0.228316	0.0153874	0.00344746	0	0.0120949	0	0.0548031	0.03523	0.0966684	0.0708208	0.13241	0.0207213	0.00461329	0.08505	0	0	0	0	0.45322	0.891966	Low-fibrotic
TCGA-BH-A8G0	0.154303	0.0361643	0.00499135	0.00696918	0	0.239801	0	1.48082e-05	0	0	0	0.015022	0.0064641	0.157117	0.0701088	0.17792	0.00617056	0	0.124954	0	0	0	0	0.596295	0.821824	Low-fibrotic
TCGA-AO-A0JC	0.191328	0	0.00992247	0.148334	0	0.142093	0.0885153	0.069911	0.00596784	0.0388531	0	0.0118951	0	0	0.063503	0.128534	0.0348217	0.0344335	0.0318883	0	0	0	0	0.671929	0.773781	Low-fibrotic
TCGA-B6-A0IQ	0.046647	0	0.170532	0.20385	0	0.0443395	0.0307578	0.0770014	0	0.00340049	0	0.0211712	0.0123211	0.130179	0.122933	0.0613819	0.0666764	0	0.00302689	0	0.00578208	0	0	0.478905	0.877309	Low-fibrotic
TCGA-OL-A5RX	0.146884	0	0.0897354	0.0612629	0	0.239935	0	0.0196821	0	0.0242619	0	0.0131865	0.0166831	0.0706483	0.0781431	0.102455	0.0302924	0	0.106829	0	0	0	0	0.41042	0.911099	Low-fibrotic
TCGA-LD-A66U	0.101407	0	0.112623	0.209319	0	0.098402	0	0.100119	0.0124888	0	0	0.0546248	0.0207879	0.0213917	0.0705464	0.0977961	0.0263575	0	0.0741369	0	0	0	0	0.521539	0.855193	Low-fibrotic
TCGA-A7-A6VW	0.0856468	0	0.118205	0.0549606	0	0.112022	0	0.0393598	0.00163249	0	0	0.0480711	0.0132122	0.154456	0.0610781	0.177045	0	0.091406	0.0087776	0	0	0.0341276	0	0.427341	0.903224	Low-fibrotic
TCGA-BH-AB28	0.180095	0	0.0511144	0.0582122	0	0.263316	0	0.0192362	0	0	0	0	0.0336127	0.0542985	0.0960107	0.151352	0.00937899	0	0.0823386	0	0.00103406	0	0	0.472701	0.881528	Low-fibrotic
TCGA-E9-A5FK	0.0802083	0	0.0886554	0.187598	0	0.0523984	0.0210833	0.0615033	0.0459354	0.0259835	0	0.0411563	0.0111318	0.0298064	0.0801086	0.102665	0.0670927	0.0215559	0.0831179	0	0	0	0	0.628844	0.804754	Low-fibrotic
TCGA-A2-A0CK	0.029642	0	0.138138	0.158118	0	0.157501	0.0259143	0	0	0.0921235	0	0.0255116	0	0.011194	0.0845147	0.161079	0.0202104	0	0.0960535	0	0	0	0	0.420338	0.906591	Low-fibrotic
TCGA-EW-A424	0	0.0137698	0.264951	0.0630166	0	0.151824	0	0.0235199	0	0	0	0	0.0354883	0.0368212	0.0456181	0.171181	0.0258283	0	0.160931	0	0.00705044	0	0	0.29761	0.965368	Low-fibrotic
TCGA-B6-A0RQ	0.115156	0	0.0855958	0.14745	0	0.0441653	0	0.0443566	0.000391059	0	0	0.0183095	0.028731	0.0818273	0.0377475	0.189075	0.0535775	0.00267524	0.150942	0	0	0	0	0.215847	0.99151	Low-fibrotic
TCGA-GM-A5PV	0	0	0.0658795	0.131397	0	0.164102	0	0.0582319	0	0.0467735	0	0.0324397	0.00266817	0.0358231	0.100908	0.177365	0.121349	0	0.0630641	0	0	0	0	0.369079	0.929726	Low-fibrotic
TCGA-A7-A4SC	0.106985	0	0.0773193	0.143445	0	0.194115	0	0.0150045	0.015232	0	0.00748365	0	0.043594	0	0.0635564	0.127798	0.116564	0	0.0889013	0	0	0	0	0.339577	0.941727	Low-fibrotic
TCGA-OL-A66I	0.0226661	0.00576526	0.0429028	0.200563	0	0.0987507	0.0808973	0.0118469	0.0616453	0	0	0.0543935	0.0113294	0.0494903	0.0786111	0.0728379	0.0956365	0.0262819	0.0769954	0	0	0.00938608	0	0.611714	0.813828	Low-fibrotic
TCGA-C8-A3M7	0.0787341	0	0.152096	0.123127	0	0.144027	0	0.0331597	0	0.0250646	0	0.0452761	0.016055	0	0.0772408	0.104642	0.0411787	0.0105215	0.148877	0	0	0	0	0.414371	0.90933	Low-fibrotic
TCGA-OL-A97C	0.00864124	0	0.0396313	0.24359	0	0.109565	0.0666084	0.0446833	0	0	0	0.0260179	0.0146551	0.116701	0.085851	0.16274	0.0416519	0	0.0396644	0	0	0	0	0.407344	0.91281	Low-fibrotic
TCGA-AR-A1AM	0.0403249	0	0.137781	0.143211	0	0.145333	0	0.0258702	0.0219061	0.00504428	0	0.0169723	0.019971	0.0541803	0.0745823	0.134949	0.0758044	0	0.10407	0	0	0	0	0.446367	0.895219	Low-fibrotic
TCGA-A1-A0SF	0.0532075	0	0.160452	0.187854	0	0.143006	0	0.0112214	0.0224543	0.0310151	0	0.0274325	0.0072153	0.00525248	0.0758375	0.0995885	0.0809347	0.0107499	0.0837795	0	0	0	0	0.51784	0.858569	Low-fibrotic
TCGA-C8-A12K	0	0.0414551	0.0348476	0.0904393	0	0.170351	0.111321	0.013791	0.00127401	0	0	0.047417	0.0309174	0.082431	0.0916357	0.103644	0.0626085	0.0640811	0.04489	0	0	0.008896	0	0.577598	0.834244	Low-fibrotic
TCGA-AC-A6IW	0.0160068	0.0284749	0.0324073	0.123257	0	0.0319232	0.042629	0.0923365	0.00208415	0.0290767	0	0.0636603	0.00766113	0.0294569	0.130447	0.159632	0.193107	0	0.0169547	0	0.000885372	0	0	0.587592	0.823985	Low-fibrotic
TCGA-B6-A0I5	0.0848133	0	0.087946	0.112528	0	0.164244	0.0317274	0.0189493	0.0304131	0	0	0.00487832	0.0396421	0.0556354	0.0536594	0.160854	0.0751252	0.0372706	0.0423136	0	0	0	0	0.395637	0.917641	Low-fibrotic
TCGA-AC-A6NO	0.0532033	0.00799501	0.0591079	0.144004	0	0.177035	0	0.0472842	0	0	0	0	0.0361277	0.125242	0.0919594	0.1282	0.0398448	0	0.0899966	0	0	0	0	0.257206	0.977175	Low-fibrotic
TCGA-AO-A03T	0.0587821	0	0.0538272	0.0828262	0	0.198409	0.0604603	0.032304	0.00326229	0.0253467	0	0.0581462	0.00945725	0.0953602	0.10819	0.115778	0.0410526	0	0.0567983	0	0	0	0	0.443496	0.895737	Low-fibrotic
TCGA-AC-A8OQ	0.01528	0.0810377	0.165165	0.101315	0	0.0734015	0	0.043112	0	0	0	0.0819327	0.0238617	0.100901	0.0614903	0.113569	0.0105209	0.0327696	0.0949927	0	0.000650194	0	0	0.558905	0.839253	Low-fibrotic
TCGA-E9-A1N8	0.0919065	0	0.0145475	0.148356	0	0.110153	0.0304088	0.0822792	0.0192553	0	0	0.0270247	0	0.118534	0.131082	0.161085	0.00042026	0.0345787	0.0303682	0	0	0	0	0.234047	0.994894	Low-fibrotic
TCGA-A2-A3Y0	0.0298301	0.014996	0.0712305	0.213457	0	0.0716852	0.0667527	0.0583344	0.0541863	0	0	0.0352846	0.00151625	0.0966848	0.0806409	0.119566	0.0205171	0.0302711	0.0236349	0	0	0.0114122	0	0.516128	0.85962	Low-fibrotic
TCGA-MS-A51U	0.0631434	0	0.127478	0.128759	0	0.162307	0	0.0389117	0.00746012	0.0303392	0	0.0381931	0.0234794	0.0444435	0.0963423	0.0993095	0.0458114	0	0.0940224	0	0	0	0	0.435576	0.899388	Low-fibrotic
TCGA-S3-AA15	0.109249	0	0.148053	0.141819	0	0.0754014	0.0863391	0	0.0218679	0.00446557	0	0.00978612	0.0276684	0.0605897	0.0421308	0.136987	0.0260396	0.00874523	0.100858	0	0	0	0	0.635684	0.805349	Low-fibrotic
TCGA-EW-A1P3	0.0123806	0.0536398	0.112071	0.144251	0	0.0845924	0	0	0	0.0593218	0	0	0.000629535	0.0643954	0.102799	0.134691	0.0403551	0	0.177435	0	0.0134385	0	0	0.359709	0.933412	Low-fibrotic

## Sheet: Table S3
Table S3. TCGA clinical parameter
submitter_id.samples	age_at_index.demographic	gender.demographic	race.demographic	pathologic_M	pathologic_N	pathologic_T	OS.time	OS	Subtype_Immune_Model_Based
TCGA-3C-AAAU-01A	55	female	white	MX	NX	TX	4047	0	Wound Healing (Immune C1)
TCGA-3C-AALI-01A	50	female	black or african american	M0	N1a	T2	4005	0	Wound Healing (Immune C1)
TCGA-3C-AALJ-01A	62	female	black or african american	M0	N1a	T2	1474	0	Wound Healing (Immune C1)
TCGA-3C-AALK-01A	52	female	black or african american	M0	N0 (i+)	T1c	1448	0	Wound Healing (Immune C1)
TCGA-4H-AAAK-01A	50	female	white	M0	N2a	T2	348	0	Wound Healing (Immune C1)
TCGA-5L-AAT0-01A	42	female	white	M0	N0	T2	1477	0	Inflammatory (Immune C3)
TCGA-5L-AAT1-01A	63	female	white	M1	N0	T2	1471	0	#N/A
TCGA-5T-A9QA-01A	52	female	black or african american	MX	NX	T2	303	0	Lymphocyte Depleted (Immune C4)
TCGA-A1-A0SB-01A	70	female	white	M0	N0	T1c	259	0	Wound Healing (Immune C1)
TCGA-A1-A0SD-01A	59	female	white	M0	N0	T2	437	0	IFN-gamma Dominant (Immune C2)
TCGA-A1-A0SE-01A	56	female	white	M0	N0 (i-)	T1c	1321	0	Wound Healing (Immune C1)
TCGA-A1-A0SF-01A	54	female	white	M0	N0	T2	1463	0	Wound Healing (Immune C1)
TCGA-A1-A0SG-01A	61	female	white	M0	N1a	T2	434	0	Inflammatory (Immune C3)
TCGA-A1-A0SH-01A	39	female	white	M0	N0 (i-)	T2	1437	0	TGF-beta Dominant (Immune C6)
TCGA-A1-A0SI-01A	52	female	white	M0	N1a	T2	635	0	IFN-gamma Dominant (Immune C2)
TCGA-A1-A0SJ-01A	39	female	black or african american	M0	N1a	T3	416	0	Wound Healing (Immune C1)
TCGA-A1-A0SK-01A	54	female	asian	M0	N0 (i-)	T2	967	1	Wound Healing (Immune C1)
TCGA-A1-A0SM-01A	77	male	white	M0	N0 (i-)	T2	242	0	Wound Healing (Immune C1)
TCGA-A1-A0SN-01A	50	female	white	MX	N1	T1c	1196	0	Wound Healing (Immune C1)
TCGA-A1-A0SO-01A	67	female	white	M0	N1	T2	852	0	Wound Healing (Immune C1)
TCGA-A1-A0SP-01A	40	female	not reported	M0	N0 (i-)	T2	584	0	IFN-gamma Dominant (Immune C2)
TCGA-A1-A0SQ-01A	45	female	white	MX	N1	T2	554	0	Inflammatory (Immune C3)
TCGA-A2-A04N-01A	66	female	white	M0	N0 (i-)	T1c	4354	0	Wound Healing (Immune C1)
TCGA-A2-A04P-01A	36	female	black or african american	M0	N3c	T2	548	1	IFN-gamma Dominant (Immune C2)
TCGA-A2-A04Q-01A	48	female	white	M0	N0 (i-)	T1	2385	0	IFN-gamma Dominant (Immune C2)
TCGA-A2-A04R-01A	36	female	black or african american	M0	N0 (i-)	T1	3709	0	Wound Healing (Immune C1)
TCGA-A2-A04T-01A	62	female	white	M0	N0 (i-)	T2	2246	0	IFN-gamma Dominant (Immune C2)
TCGA-A2-A04U-01A	47	female	white	M0	N0 (i+)	T2	2654	0	Wound Healing (Immune C1)
TCGA-A2-A04V-01A	39	female	white	M0	N0 (i-)	T2	1920	1	Wound Healing (Immune C1)
TCGA-A2-A04W-01A	50	female	white	M0	N1mi	T2	3102	0	Wound Healing (Immune C1)
TCGA-A2-A04X-01A	34	female	white	M0	N0 (i-)	T2	1686	0	IFN-gamma Dominant (Immune C2)
TCGA-A2-A04Y-01A	53	female	white	M0	N1mi	T2	1099	0	IFN-gamma Dominant (Immune C2)
TCGA-A2-A0CK-01A	60	female	white	M0	N2a	T3	4159	0	Wound Healing (Immune C1)
TCGA-A2-A0CL-01A	37	female	black or african american	M0	N2a	T3	3015	0	IFN-gamma Dominant (Immune C2)
TCGA-A2-A0CM-01A	40	female	black or african american	M0	N0 (i-)	T2	754	1	IFN-gamma Dominant (Immune C2)
TCGA-A2-A0CO-01A	85	female	white	M0	N0	T3	1468	1	IFN-gamma Dominant (Immune C2)
TCGA-A2-A0CP-01A	60	female	white	M0	N0 (i-)	T1c	2813	0	Wound Healing (Immune C1)
TCGA-A2-A0CQ-01A	62	female	black or african american	M0	N0 (i-)	T1	2695	0	Lymphocyte Depleted (Immune C4)
TCGA-A2-A0CR-01A	54	female	asian	M0	N0	T3	3283	0	TGF-beta Dominant (Immune C6)
TCGA-A2-A0CS-01A	73	female	white	M1	N3a	T4b	2348	1	Wound Healing (Immune C1)
TCGA-A2-A0CT-01A	71	female	white	M0	N0 (i-)	T2	2289	0	Wound Healing (Immune C1)
TCGA-A2-A0CU-01A	73	female	white	M0	N0 (i+)	T2	158	1	Wound Healing (Immune C1)
TCGA-A2-A0CV-01A	41	female	asian	M0	N1a	T2	3011	0	Inflammatory (Immune C3)
TCGA-A2-A0CW-01A	67	female	white	M0	N1a	T2	3283	0	IFN-gamma Dominant (Immune C2)
TCGA-A2-A0CX-01A	52	female	white	M0	N0 (i-)	T2	1728	0	IFN-gamma Dominant (Immune C2)
TCGA-A2-A0CY-01A	63	female	white	M0	N1	T2	1673	0	Wound Healing (Immune C1)
TCGA-A2-A0CZ-01A	46	female	white	M0	N0 (i-)	T2	1616	0	Inflammatory (Immune C3)
TCGA-A2-A0D0-01A	60	female	black or african american	M0	N0 (i-)	T2	2048	0	IFN-gamma Dominant (Immune C2)
TCGA-A2-A0D1-01A	76	female	white	M0	N0 (i-)	T2	1051	0	Wound Healing (Immune C1)
TCGA-A2-A0D2-01A	45	female	white	M0	N0 (i+)	T2	1027	0	Wound Healing (Immune C1)
TCGA-A2-A0D3-01A	42	female	white	M0	N0 (i-)	T1c	1873	0	Inflammatory (Immune C3)
TCGA-A2-A0D4-01A	37	female	black or african american	M0	N1a	T2	767	0	Wound Healing (Immune C1)
TCGA-A2-A0EM-01A	73	female	white	M0	N0 (i-)	T1	3094	0	Wound Healing (Immune C1)
TCGA-A2-A0EN-01A	70	female	white	M0	N0 (i+)	T2	4088	0	Inflammatory (Immune C3)
TCGA-A2-A0EO-01A	54	female	white	M0	N0 (i-)	T1	2442	0	Inflammatory (Immune C3)
TCGA-A2-A0EP-01A	56	female	white	M0	N0 (i+)	T1	3603	0	Inflammatory (Immune C3)
TCGA-A2-A0EQ-01A	64	female	black or african american	M0	N0 (i-)	T2	2426	0	IFN-gamma Dominant (Immune C2)
TCGA-A2-A0ER-01A	63	female	white	M0	N1mi	T1c	2263	0	Wound Healing (Immune C1)
TCGA-A2-A0ES-01A	52	female	white	M0	N0 (i-)	T2	2190	0	Inflammatory (Immune C3)
TCGA-A2-A0ET-01A	58	female	white	M0	N2a	T2	1066	0	Lymphocyte Depleted (Immune C4)
TCGA-A2-A0EU-01A	79	female	white	M0	N0 (i-)	T1c	1043	0	Wound Healing (Immune C1)
TCGA-A2-A0EV-01A	80	female	white	M0	N0 (i-)	T1c	968	0	IFN-gamma Dominant (Immune C2)
TCGA-A2-A0EW-01A	53	female	white	M0	N3a	T1b	1884	1	Inflammatory (Immune C3)
TCGA-A2-A0EX-01A	46	female	white	M0	N0 (i+)	T3	752	0	Inflammatory (Immune C3)
TCGA-A2-A0EY-01A	62	female	white	M0	N1a	T2	1925	0	Wound Healing (Immune C1)
TCGA-A2-A0ST-01A	62	female	white	M0	N1a	T1c	3017	0	IFN-gamma Dominant (Immune C2)
TCGA-A2-A0SU-01A	66	female	white	M0	N0 (i+)	T2	1662	0	Wound Healing (Immune C1)
TCGA-A2-A0SV-01A	63	female	white	M1	N2a	T2	825	1	IFN-gamma Dominant (Immune C2)
TCGA-A2-A0SW-01A	82	female	white	M1	N2	T2	1365	1	IFN-gamma Dominant (Immune C2)
TCGA-A2-A0SX-01A	48	female	white	M0	N0 (i-)	T1c	1534	0	IFN-gamma Dominant (Immune C2)
TCGA-A2-A0SY-01A	62	female	white	M0	N1	T3	1347	0	Inflammatory (Immune C3)
TCGA-A2-A0T0-01A	59	female	white	M0	N1	T2	533	0	Wound Healing (Immune C1)
TCGA-A2-A0T1-01A	55	female	american indian or alaska native	M0	N3	T3	521	0	Wound Healing (Immune C1)
TCGA-A2-A0T2-01A	66	female	white	M1	N3	T3	255	1	Wound Healing (Immune C1)
TCGA-A2-A0T3-01A	37	female	white	M0	N1mi	T1c	1516	0	Wound Healing (Immune C1)
TCGA-A2-A0T4-01A	62	female	white	M0	N0 (i-)	T2	624	0	IFN-gamma Dominant (Immune C2)
TCGA-A2-A0T5-01A	39	female	white	M0	N0 (i-)	T2	531	0	Wound Healing (Immune C1)
TCGA-A2-A0T6-01A	50	female	white	M0	N0 (i-)	T3	575	0	Inflammatory (Immune C3)
TCGA-A2-A0T7-01A	51	female	white	M0	N0 (i+)	T2	631	0	Wound Healing (Immune C1)
TCGA-A2-A0YC-01A	59	female	white	M0	N1mi	T2	990	0	IFN-gamma Dominant (Immune C2)
TCGA-A2-A0YD-01A	63	female	white	M0	N0 (i+)	T3	769	0	Wound Healing (Immune C1)
TCGA-A2-A0YE-01A	48	female	white	M0	N1a	T2	554	0	IFN-gamma Dominant (Immune C2)
TCGA-A2-A0YF-01A	67	female	black or african american	M0	N0 (i+)	T1b	1535	0	Lymphocyte Depleted (Immune C4)
TCGA-A2-A0YG-01A	63	female	white	M0	N3a	T2	666	0	Wound Healing (Immune C1)
TCGA-A2-A0YH-01A	53	female	white	M0	N2a	T2	659	0	IFN-gamma Dominant (Immune C2)
TCGA-A2-A0YI-01A	62	female	white	M0	N0 (i+)	T1c	1505	0	Inflammatory (Immune C3)
TCGA-A2-A0YJ-01A	39	female	white	M0	N2a	T3	566	0	Wound Healing (Immune C1)
TCGA-A2-A0YK-01A	61	female	white	M0	N0 (i-)	T2	588	0	Inflammatory (Immune C3)
TCGA-A2-A0YL-01A	48	female	white	M0	N2a	T3	1474	0	Wound Healing (Immune C1)
TCGA-A2-A0YM-01A	67	female	white	M0	N0 (i-)	T2	965	0	IFN-gamma Dominant (Immune C2)
TCGA-A2-A0YT-01A	56	female	white	M0	N2a	T4b	723	1	IFN-gamma Dominant (Immune C2)
TCGA-A2-A1FV-01A	74	female	white	M0	N0 (i+)	T3	714	0	Inflammatory (Immune C3)
TCGA-A2-A1FW-01A	62	female	white	M0	N2a	T3	528	0	Lymphocyte Depleted (Immune C4)
TCGA-A2-A1FX-01A	61	female	white	M0	N2a	T3	1847	0	Lymphocyte Depleted (Immune C4)
TCGA-A2-A1FZ-01A	63	female	white	M0	N0 (i-)	T2	683	0	Inflammatory (Immune C3)
TCGA-A2-A1G0-01A	49	female	white	M0	N1a	T2	616	0	Inflammatory (Immune C3)
TCGA-A2-A1G1-01A	85	female	white	M0	N1	T2	584	0	IFN-gamma Dominant (Immune C2)
TCGA-A2-A1G4-01A	71	female	white	M0	N1a	T3	595	0	Wound Healing (Immune C1)
TCGA-A2-A1G6-01A	50	female	white	M0	N2a	T2	501	0	Inflammatory (Immune C3)
TCGA-A2-A259-01A	70	female	black or african american	M0	N0 (i-)	T1c	1596	0	Wound Healing (Immune C1)
TCGA-A2-A25A-01A	44	female	white	M0	N0 (i-)	T2	3276	0	Wound Healing (Immune C1)
TCGA-A2-A25B-01A	39	female	black or african american	M0	N1	T2	1291	0	IFN-gamma Dominant (Immune C2)
TCGA-A2-A25C-01A	50	female	white	M0	N1a	T2	523	0	IFN-gamma Dominant (Immune C2)
TCGA-A2-A25D-01A	90	female	white	M0	N3a	T2	1329	0	IFN-gamma Dominant (Immune C2)
TCGA-A2-A25E-01A	34	female	black or african american	M0	N2a	T2	3204	0	Wound Healing (Immune C1)
TCGA-A2-A25F-01A	66	female	white	M0	N0 (i-)	T2	322	0	IFN-gamma Dominant (Immune C2)
TCGA-A2-A3KC-01A	55	female	black or african american	M0	N1a	T2	1102	0	Inflammatory (Immune C3)
TCGA-A2-A3KD-01A	47	female	white	M0	N1mi	T3	1206	0	Inflammatory (Immune C3)
TCGA-A2-A3XS-01A	62	female	black or african american	M0	N2a	T1	1032	1	IFN-gamma Dominant (Immune C2)
TCGA-A2-A3XT-01A	45	female	black or african american	M0	N1a	T2	2770	0	IFN-gamma Dominant (Immune C2)
TCGA-A2-A3XU-01A	35	female	black or african american	M0	N1mi	T2	912	1	Wound Healing (Immune C1)
TCGA-A2-A3XV-01A	46	female	black or african american	M0	N0	T2	996	0	Wound Healing (Immune C1)
TCGA-A2-A3XW-01A	42	female	black or african american	M0	N1a	T2	1712	0	IFN-gamma Dominant (Immune C2)
TCGA-A2-A3XX-01A	49	female	black or african american	M0	N0	T2	1439	1	Wound Healing (Immune C1)
TCGA-A2-A3XY-01A	49	female	black or african american	M0	N1a	T2	1093	1	IFN-gamma Dominant (Immune C2)
TCGA-A2-A3XZ-01A	46	female	black or african american	M0	N0	T1c	1532	0	IFN-gamma Dominant (Immune C2)
TCGA-A2-A3Y0-01A	57	female	black or african american	M0	N1a	T2	1546	0	IFN-gamma Dominant (Immune C2)
TCGA-A2-A4RW-01A	49	female	white	M0	N3a	T2	222	0	Inflammatory (Immune C3)
TCGA-A2-A4RX-01A	67	female	black or african american	M0	N0	T2	742	0	Inflammatory (Immune C3)
TCGA-A2-A4RY-01A	46	female	white	M0	N3a	T3	648	0	Inflammatory (Immune C3)
TCGA-A2-A4S0-01A	77	female	white	M0	N0	T2	706	0	Inflammatory (Immune C3)
TCGA-A2-A4S1-01A	66	female	white	M0	N0	T2	820	0	TGF-beta Dominant (Immune C6)
TCGA-A2-A4S2-01A	62	female	white	M0	N2	T3	643	0	IFN-gamma Dominant (Immune C2)
TCGA-A2-A4S3-01A	59	female	black or african american	M0	N1a	T2	666	0	IFN-gamma Dominant (Immune C2)
TCGA-A7-A0CD-01A	66	female	white	M0	N0	T1	1165	0	Lymphocyte Depleted (Immune C4)
TCGA-A7-A0CE-01A	57	female	white	M0	N0 (i-)	T2	1074	0	IFN-gamma Dominant (Immune C2)
TCGA-A7-A0CE-11A	57	female	white	M0	N0 (i-)	T2	1074	0	#N/A
TCGA-A7-A0CG-01A	78	female	white	M0	N0 (i-)	T2	1043	0	Inflammatory (Immune C3)
TCGA-A7-A0CH-01A	79	female	white	M0	N0 (i-)	T2	1079	0	Wound Healing (Immune C1)
TCGA-A7-A0CH-11A	79	female	white	M0	N0 (i-)	T2	1079	0	#N/A
TCGA-A7-A0CJ-01A	57	female	white	M0	N0 (i-)	T2	931	0	IFN-gamma Dominant (Immune C2)
TCGA-A7-A0D9-01A	37	female	white	M0	N0 (i-)	T2	1139	0	Wound Healing (Immune C1)
TCGA-A7-A0D9-11A	37	female	white	M0	N0 (i-)	T2	1139	0	#N/A
TCGA-A7-A0DA-01A	62	female	white	M0	N0 (i-)	T2	1085	0	Wound Healing (Immune C1)
TCGA-A7-A0DB-01A	56	female	white	M0	N0 (i-)	T2	1007	0	TGF-beta Dominant (Immune C6)
TCGA-A7-A0DB-01C	56	female	white	M0	N0 (i-)	T2	1007	0	TGF-beta Dominant (Immune C6)
TCGA-A7-A0DB-11A	56	female	white	M0	N0 (i-)	T2	1007	0	#N/A
TCGA-A7-A0DC-01A	63	female	white	M0	N0 (i-)	T1c	906	0	#N/A
TCGA-A7-A0DC-01B	63	female	white	M0	N0 (i-)	T1c	906	0	#N/A
TCGA-A7-A0DC-11A	63	female	white	M0	N0 (i-)	T1c	906	0	#N/A
TCGA-A7-A13D-01A	46	female	black or african american	M0	N0 (i-)	T2	965	0	IFN-gamma Dominant (Immune C2)
TCGA-A7-A13D-01B	46	female	black or african american	M0	N0 (i-)	T2	965	0	IFN-gamma Dominant (Immune C2)
TCGA-A7-A13E-01A	62	female	white	MX	N1	T2	614	1	Wound Healing (Immune C1)
TCGA-A7-A13E-01B	62	female	white	MX	N1	T2	614	1	Wound Healing (Immune C1)
TCGA-A7-A13E-11A	62	female	white	MX	N1	T2	614	1	#N/A
TCGA-A7-A13F-01A	44	female	white	M0	N1a	T3	765	0	Lymphocyte Depleted (Immune C4)
TCGA-A7-A13F-11A	44	female	white	M0	N1a	T3	765	0	#N/A
TCGA-A7-A13G-01A	79	female	white	MX	N0	T2	718	0	Inflammatory (Immune C3)
TCGA-A7-A13G-01B	79	female	white	MX	N0	T2	718	0	Inflammatory (Immune C3)
TCGA-A7-A13G-11A	79	female	white	MX	N0	T2	718	0	#N/A
TCGA-A7-A13H-01A	61	female	white	MX	N1a	T2	899	0	Inflammatory (Immune C3)
TCGA-A7-A26E-01A	71	female	white	MX	N1a	T3	954	0	Inflammatory (Immune C3)
TCGA-A7-A26E-01B	71	female	white	MX	N1a	T3	954	0	Inflammatory (Immune C3)
TCGA-A7-A26G-01A	50	female	black or african american	M0	N0 (i+)	T2	722	0	Wound Healing (Immune C1)
TCGA-A7-A26H-01A	72	female	white	M0	N1a	T1	724	0	Wound Healing (Immune C1)
TCGA-A7-A26J-01A	49	female	white	M0	N0	T2	627	0	IFN-gamma Dominant (Immune C2)
TCGA-A7-A26J-01B	49	female	white	M0	N0	T2	627	0	IFN-gamma Dominant (Immune C2)
TCGA-A7-A2KD-01A	53	female	black or african american	MX	N2a	T2	679	0	IFN-gamma Dominant (Immune C2)
TCGA-A7-A3IY-01A	71	female	white	M0	N0	T1c	345	0	Lymphocyte Depleted (Immune C4)
TCGA-A7-A3IZ-01A	62	female	white	M0	N0 (i+)	T2	322	0	Inflammatory (Immune C3)
TCGA-A7-A3J0-01A	62	female	white	M0	N0	T2	313	0	Inflammatory (Immune C3)
TCGA-A7-A3J1-01A	63	female	white	MX	N0	T1c	343	0	IFN-gamma Dominant (Immune C2)
TCGA-A7-A3RF-01A	79	female	white	M0	N0	T2	408	0	Lymphocyte Depleted (Immune C4)
TCGA-A7-A425-01A	70	female	white	MX	N3a	T3	447	0	Inflammatory (Immune C3)
TCGA-A7-A426-01A	50	female	white	MX	N3a	T3	364	0	Inflammatory (Immune C3)
TCGA-A7-A4SA-01A	40	female	white	M0	N1a	T2	454	0	IFN-gamma Dominant (Immune C2)
TCGA-A7-A4SA-11A	40	female	white	M0	N1a	T2	454	0	#N/A
TCGA-A7-A4SB-01A	56	female	white	M0	N1mi	T3	418	0	Inflammatory (Immune C3)
TCGA-A7-A4SC-01A	62	female	white	MX	N0	T3	446	0	Inflammatory (Immune C3)
TCGA-A7-A4SC-11A	62	female	white	MX	N0	T3	446	0	#N/A
TCGA-A7-A4SD-01A	52	female	black or african american	M0	N0	T2	441	0	IFN-gamma Dominant (Immune C2)
TCGA-A7-A4SD-11A	52	female	black or african american	M0	N0	T2	441	0	#N/A
TCGA-A7-A4SE-01A	54	female	black or african american	M0	N0	T2	644	0	IFN-gamma Dominant (Immune C2)
TCGA-A7-A4SE-11A	54	female	black or african american	M0	N0	T2	644	0	#N/A
TCGA-A7-A4SF-01A	54	female	black or african american	M0	N0	T2	545	0	Wound Healing (Immune C1)
TCGA-A7-A56D-01A	84	female	black or african american	M0	N0	T2	448	0	IFN-gamma Dominant (Immune C2)
TCGA-A7-A56D-11A	84	female	black or african american	M0	N0	T2	448	0	#N/A
TCGA-A7-A5ZV-01A	62	female	black or african american	M0	N0	T2	368	0	Lymphocyte Depleted (Immune C4)
TCGA-A7-A5ZW-01A	47	female	black or african american	M0	N1a	T1c	326	0	Wound Healing (Immune C1)
TCGA-A7-A5ZX-01A	48	female	white	M0	N3a	T2	336	0	Inflammatory (Immune C3)
TCGA-A7-A5ZX-11A	48	female	white	M0	N3a	T2	336	0	#N/A
TCGA-A7-A6VV-01A	51	female	black or african american	M0	N0	T2	313	0	Wound Healing (Immune C1)
TCGA-A7-A6VW-01A	48	female	black or african american	M0	N0	T2	285	0	IFN-gamma Dominant (Immune C2)
TCGA-A7-A6VX-01A	68	female	black or african american	M0	N0	T2	317	0	IFN-gamma Dominant (Immune C2)
TCGA-A7-A6VY-01A	48	female	black or african american	M0	N1	T2	266	0	IFN-gamma Dominant (Immune C2)
TCGA-A8-A06N-01A	66	female	not reported	M0	N0	T4b	1329	0	Lymphocyte Depleted (Immune C4)
TCGA-A8-A06O-01A	60	female	not reported	M0	N0	T1c	396	0	IFN-gamma Dominant (Immune C2)
TCGA-A8-A06P-01A	63	female	not reported	M0	N2a	T1c	396	0	Wound Healing (Immune C1)
TCGA-A8-A06Q-01A	63	female	not reported	M0	N2	T3	31	0	Lymphocyte Depleted (Immune C4)
TCGA-A8-A06R-01A	69	female	not reported	M0	N1a	T2	547	0	IFN-gamma Dominant (Immune C2)
TCGA-A8-A06T-01A	75	female	not reported	M0	N1a	T3	1614	0	IFN-gamma Dominant (Immune C2)
TCGA-A8-A06U-01A	80	female	not reported	M0	N1a	T2	883	1	IFN-gamma Dominant (Immune C2)
TCGA-A8-A06X-01A	77	female	not reported	M0	N0	T3	943	1	IFN-gamma Dominant (Immune C2)
TCGA-A8-A06Y-01A	66	female	not reported	M0	N0	T2	791	0	Lymphocyte Depleted (Immune C4)
TCGA-A8-A06Z-01A	84	female	not reported	M0	N0	T3	31	0	Lymphocyte Depleted (Immune C4)
TCGA-A8-A075-01A	42	female	not reported	M0	N1a	T2	518	0	Wound Healing (Immune C1)
TCGA-A8-A076-01A	66	female	not reported	M0	N0	T2	1642	0	IFN-gamma Dominant (Immune C2)
TCGA-A8-A079-01A	69	female	not reported	M0	N3	T4b	274	0	Wound Healing (Immune C1)
TCGA-A8-A07B-01A	69	female	not reported	M0	N0	T2	1308	0	Wound Healing (Immune C1)
TCGA-A8-A07C-01A	57	female	not reported	M0	N0	T2	1034	0	IFN-gamma Dominant (Immune C2)
TCGA-A8-A07E-01A	81	female	not reported	MX	N3a	T4b	608	0	Wound Healing (Immune C1)
TCGA-A8-A07F-01A	65	female	not reported	M0	N1a	T2	577	0	Inflammatory (Immune C3)
TCGA-A8-A07G-01A	65	female	not reported	M0	N1a	T1c	577	0	Wound Healing (Immune C1)
TCGA-A8-A07I-01A	69	female	not reported	M0	N2a	T2	426	0	IFN-gamma Dominant (Immune C2)
TCGA-A8-A07J-01A	35	female	not reported	M0	N1a	T2	365	0	TGF-beta Dominant (Immune C6)
TCGA-A8-A07L-01A	58	female	not reported	M0	N1a	T3	975	0	Wound Healing (Immune C1)
TCGA-A8-A07O-01A	51	female	not reported	M0	N0	T2	304	0	Wound Healing (Immune C1)
TCGA-A8-A07P-01A	68	female	not reported	M0	N1	T2	334	0	Wound Healing (Immune C1)
TCGA-A8-A07R-01A	80	female	not reported	M0	N3a	T2	273	0	IFN-gamma Dominant (Immune C2)
TCGA-A8-A07S-01A	73	female	not reported	M0	N0	T2	243	0	Lymphocyte Depleted (Immune C4)
TCGA-A8-A07U-01A	66	female	not reported	M0	N2a	T2	760	0	IFN-gamma Dominant (Immune C2)
TCGA-A8-A07W-01A	76	female	not reported	M1	NX	T2	304	0	Wound Healing (Immune C1)
TCGA-A8-A07Z-01A	85	female	not reported	M0	N0	T2	1371	0	IFN-gamma Dominant (Immune C2)
TCGA-A8-A081-01A	80	female	not reported	M0	N0	T2	1329	0	IFN-gamma Dominant (Immune C2)
TCGA-A8-A082-01A	58	female	not reported	M0	N1a	T2	549	0	Lymphocyte Depleted (Immune C4)
TCGA-A8-A083-01A	67	female	not reported	M0	N0	T3	1329	0	Lymphocyte Depleted (Immune C4)
TCGA-A8-A084-01A	81	female	not reported	M0	N1a	T2	458	0	#N/A
TCGA-A8-A085-01A	44	male	not reported	M0	N1a	T2	1124	0	Lymphocyte Depleted (Immune C4)
TCGA-A8-A086-01A	59	female	not reported	M0	N1a	T1c	396	0	Wound Healing (Immune C1)
TCGA-A8-A08A-01A	89	female	not reported	M0	N0	T1c	30	0	Inflammatory (Immune C3)
TCGA-A8-A08B-01A	52	female	not reported	M0	N0	T2	1156	0	IFN-gamma Dominant (Immune C2)
TCGA-A8-A08C-01A	65	female	not reported	M0	N0	T2	881	0	Inflammatory (Immune C3)
TCGA-A8-A08F-01A	59	female	not reported	M0	N3a	T2	1004	0	#N/A
TCGA-A8-A08G-01A	41	female	not reported	M0	N0	T2	607	0	IFN-gamma Dominant (Immune C2)
TCGA-A8-A08H-01A	66	female	not reported	M0	N0	T2	1201	0	TGF-beta Dominant (Immune C6)
TCGA-A8-A08I-01A	53	female	not reported	M0	N0	T2	365	0	IFN-gamma Dominant (Immune C2)
TCGA-A8-A08J-01A	52	female	not reported	M1	N3	T4b	1127	1	IFN-gamma Dominant (Immune C2)
TCGA-A8-A08L-01A	89	female	not reported	M0	N2a	T3	30	1	Wound Healing (Immune C1)
TCGA-A8-A08O-01A	45	female	not reported	M1	N3a	T2	943	0	Wound Healing (Immune C1)
TCGA-A8-A08P-01A	70	female	not reported	M0	N2a	T2	943	0	IFN-gamma Dominant (Immune C2)
TCGA-A8-A08R-01A	52	female	not reported	M0	N1a	T2	30	0	IFN-gamma Dominant (Immune C2)
TCGA-A8-A08S-01A	71	female	not reported	M0	N1	T1c	1004	0	#N/A
TCGA-A8-A08T-01A	64	female	not reported	M1	N1a	T2	3409	1	Wound Healing (Immune C1)
TCGA-A8-A08X-01A	43	female	not reported	M0	N3a	T4d	1308	0	Wound Healing (Immune C1)
TCGA-A8-A08Z-01A	76	female	not reported	M0	N3a	T4b	1217	0	TGF-beta Dominant (Immune C6)
TCGA-A8-A090-01A	74	female	not reported	M0	N0	T2	1201	0	IFN-gamma Dominant (Immune C2)
TCGA-A8-A091-01A	61	female	not reported	M0	N0	T2	1004	0	Inflammatory (Immune C3)
TCGA-A8-A092-01A	48	female	not reported	M0	N2a	T2	942	0	IFN-gamma Dominant (Immune C2)
TCGA-A8-A093-01A	61	female	not reported	M0	N0	T2	546	0	Wound Healing (Immune C1)
TCGA-A8-A094-01A	75	female	not reported	M0	N0	T2	1201	0	IFN-gamma Dominant (Immune C2)
TCGA-A8-A095-01A	45	female	not reported	M0	N0	T1c	1277	0	Wound Healing (Immune C1)
TCGA-A8-A096-01A	73	female	not reported	M0	N0	T2	1201	0	TGF-beta Dominant (Immune C6)
TCGA-A8-A097-01A	65	female	not reported	M0	N1	T2	365	0	Wound Healing (Immune C1)
TCGA-A8-A099-01A	76	female	not reported	MX	N3a	T4b	304	0	Inflammatory (Immune C3)
TCGA-A8-A09A-01A	40	female	not reported	M0	NX	T2	304	0	Inflammatory (Immune C3)
TCGA-A8-A09B-01A	58	female	not reported	M0	N1a	T4b	365	0	Wound Healing (Immune C1)
TCGA-A8-A09D-01A	47	female	not reported	M0	N1	T2	1522	0	TGF-beta Dominant (Immune C6)
TCGA-A8-A09E-01A	73	female	not reported	M0	N1a	T4b	1492	0	#N/A
TCGA-A8-A09G-01A	79	female	not reported	M0	N3a	T3	1329	0	IFN-gamma Dominant (Immune C2)
TCGA-A8-A09I-01A	84	female	not reported	M0	N0	T2	1371	0	IFN-gamma Dominant (Immune C2)
TCGA-A8-A09K-01A	68	female	not reported	M0	N1	T1c	912	0	#N/A
TCGA-A8-A09M-01A	75	female	not reported	M0	N3a	T2	1006	0	IFN-gamma Dominant (Immune C2)
TCGA-A8-A09N-01A	57	female	not reported	M0	N3a	T2	31	0	Wound Healing (Immune C1)
TCGA-A8-A09Q-01A	83	female	not reported	M0	N2a	T4b	761	0	IFN-gamma Dominant (Immune C2)
TCGA-A8-A09R-01A	82	female	not reported	M0	N1	T2	273	0	Wound Healing (Immune C1)
TCGA-A8-A09T-01A	68	female	not reported	MX	N0	T1c	579	0	Lymphocyte Depleted (Immune C4)
TCGA-A8-A09V-01A	51	female	not reported	M0	N0	T2	457	0	Inflammatory (Immune C3)
TCGA-A8-A09W-01A	70	female	not reported	M0	N3	T2	30	0	IFN-gamma Dominant (Immune C2)
TCGA-A8-A09X-01A	62	female	not reported	M0	N3a	T2	426	1	IFN-gamma Dominant (Immune C2)
TCGA-A8-A09Z-01A	83	female	not reported	M0	N0	T3	1329	0	Inflammatory (Immune C3)
TCGA-A8-A0A1-01A	84	female	not reported	M0	N0	T2	365	0	Inflammatory (Immune C3)
TCGA-A8-A0A2-01A	66	female	not reported	M0	N0	T2	579	0	Inflammatory (Immune C3)
TCGA-A8-A0A4-01A	73	female	not reported	M0	N0	T2	396	0	Wound Healing (Immune C1)
TCGA-A8-A0A6-01A	64	female	not reported	M0	N3a	T2	640	0	Inflammatory (Immune C3)
TCGA-A8-A0A7-01A	57	female	not reported	M0	N1a	T2	30	0	IFN-gamma Dominant (Immune C2)
TCGA-A8-A0A9-01A	80	female	not reported	M0	N0	T2	822	0	IFN-gamma Dominant (Immune C2)
TCGA-A8-A0AB-01A	54	female	not reported	M0	N0	T2	518	0	Wound Healing (Immune C1)
TCGA-A8-A0AD-01A	83	female	not reported	M0	N0	T1c	1157	0	Lymphocyte Depleted (Immune C4)
TCGA-AC-A23C-01A	62	female	white	MX	N1	T2	585	0	IFN-gamma Dominant (Immune C2)
TCGA-AC-A23E-01A	50	female	white	MX	N1	T2	698	0	Lymphocyte Depleted (Immune C4)
TCGA-AC-A23G-01A	76	female	white	MX	N1	T1c	2248	0	Wound Healing (Immune C1)
TCGA-AC-A23G-11A	76	female	white	MX	N1	T1c	2248	0	#N/A
TCGA-AC-A23H-01A	90	female	white	M0	NX	T2	1201	0	Wound Healing (Immune C1)
TCGA-AC-A23H-11A	90	female	white	M0	NX	T2	1201	0	#N/A
TCGA-AC-A2B8-01A	84	female	white	M0	N0 (i-)	T3	677	0	TGF-beta Dominant (Immune C6)
TCGA-AC-A2BK-01A	78	female	black or african american	MX	N2a	T2	2222	0	Wound Healing (Immune C1)
TCGA-AC-A2BK-11A	78	female	black or african american	MX	N2a	T2	2222	0	#N/A
TCGA-AC-A2BM-01A	41	female	black or african american	MX	N1a	T2	3022	0	IFN-gamma Dominant (Immune C2)
TCGA-AC-A2BM-11A	41	female	black or african american	MX	N1a	T2	3022	0	#N/A
TCGA-AC-A2FB-01A	65	female	white	MX	N0	T2	1234	0	IFN-gamma Dominant (Immune C2)
TCGA-AC-A2FB-11A	65	female	white	MX	N0	T2	1234	0	#N/A
TCGA-AC-A2FE-01A	62	female	white	MX	N3a	T3	2636	1	TGF-beta Dominant (Immune C6)
TCGA-AC-A2FE-11B	62	female	white	MX	N3a	T3	2636	1	#N/A
TCGA-AC-A2FF-01A	40	female	asian	MX	N1	T2	2759	0	Inflammatory (Immune C3)
TCGA-AC-A2FF-11A	40	female	asian	MX	N1	T2	2759	0	#N/A
TCGA-AC-A2FG-01A	79	female	white	MX	N1a	T2	1853	0	Inflammatory (Immune C3)
TCGA-AC-A2FG-11A	79	female	white	MX	N1a	T2	1853	0	#N/A
TCGA-AC-A2FK-01A	45	female	white	M0	N3a	T2	2650	0	Inflammatory (Immune C3)
TCGA-AC-A2FK-11A	45	female	white	M0	N3a	T2	2650	0	#N/A
TCGA-AC-A2FM-01A	87	female	white	M0	N1mi	T2	792	1	Wound Healing (Immune C1)
TCGA-AC-A2FM-11B	87	female	white	M0	N1mi	T2	792	1	#N/A
TCGA-AC-A2FO-01A	65	female	white	MX	N1	T2	2255	0	Inflammatory (Immune C3)
TCGA-AC-A2FO-11A	65	female	white	MX	N1	T2	2255	0	#N/A
TCGA-AC-A2QI-01A	76	female	white	MX	N1a	T3	588	0	Inflammatory (Immune C3)
TCGA-AC-A2QJ-01A	48	female	white	M0	N0	T4b	446	1	Wound Healing (Immune C1)
TCGA-AC-A2QJ-11A	48	female	white	M0	N0	T4b	446	1	#N/A
TCGA-AC-A3BB-01A	46	female	black or african american	MX	N2a	T3	987	0	Inflammatory (Immune C3)
TCGA-AC-A3EH-01A	79	female	white	M0	N3	T3	197	1	Wound Healing (Immune C1)
TCGA-AC-A3EH-11B	79	female	white	M0	N3	T3	197	1	#N/A
TCGA-AC-A3HN-01A	87	female	white	MX	N1a	T2	496	0	Inflammatory (Immune C3)
TCGA-AC-A3QP-01A	79	female	white	MX	N1mi	T2	675	0	Wound Healing (Immune C1)
TCGA-AC-A3TM-01A	50	female	white	M0	N1mi	T3	762	0	Wound Healing (Immune C1)
TCGA-AC-A3TN-01A	75	female	white	MX	N0	T3	456	0	Inflammatory (Immune C3)
TCGA-AC-A3W5-01A	65	female	black or african american	MX	N0	T2	504	0	Wound Healing (Immune C1)
TCGA-AC-A3W6-01A	90	female	white	MX	N1	T3	1201	0	Wound Healing (Immune C1)
TCGA-AC-A3W7-01A	66	female	white	MX	N1a	T2	471	0	Inflammatory (Immune C3)
TCGA-AC-A3YI-01A	74	female	white	MX	N3a	T1c	707	0	Wound Healing (Immune C1)
TCGA-AC-A3YJ-01A	66	female	white	MX	N0 (i-)	T2	754	0	Inflammatory (Immune C3)
TCGA-AC-A4ZE-01A	63	female	white	M0	N0	T3	890	0	Inflammatory (Immune C3)
TCGA-AC-A5EH-01A	76	female	black or african american	MX	N1mi	T2	511	0	Wound Healing (Immune C1)
TCGA-AC-A5XS-01A	74	female	white	MX	N0	T2	588	0	IFN-gamma Dominant (Immune C2)
TCGA-AC-A5XS-11A	74	female	white	MX	N0	T2	588	0	#N/A
TCGA-AC-A5XU-01A	74	female	black or african american	MX	N0 (i-)	T3	455	0	Wound Healing (Immune C1)
TCGA-AC-A62V-01A	58	male	black or african american	M1	N1a	T2	348	1	Wound Healing (Immune C1)
TCGA-AC-A62X-01A	72	female	black or african american	MX	N0	T2	417	0	IFN-gamma Dominant (Immune C2)
TCGA-AC-A62Y-01A	79	female	white	MX	N1	T2	530	0	Lymphocyte Depleted (Immune C4)
TCGA-AC-A6IV-01A	47	female	white	MX	N1	T2	568	0	TGF-beta Dominant (Immune C6)
TCGA-AC-A6IW-01A	73	female	black or african american	MX	N0 (i-)	T2	413	0	IFN-gamma Dominant (Immune C2)
TCGA-AC-A6IX-01A	49	female	white	MX	N3a	T2	373	0	Wound Healing (Immune C1)
TCGA-AC-A6IX-06A	49	female	white	MX	N3a	T2	373	0	#N/A
TCGA-AC-A6NO-01A	43	female	black or african american	MX	N1a	T2	51	0	Wound Healing (Immune C1)
TCGA-AC-A7VB-01A	51	female	black or african american	MX	N1a	T1c	250	0	IFN-gamma Dominant (Immune C2)
TCGA-AC-A7VC-01A	56	female	white	MX	N0	T3	1	0	Lymphocyte Depleted (Immune C4)
TCGA-AC-A8OP-01A	72	female	black or african american	MX	N0 (i-)	T1c	614	0	Inflammatory (Immune C3)
TCGA-AC-A8OQ-01A	72	female	black or african american	MX	N1a	T2	34	0	Wound Healing (Immune C1)
TCGA-AC-A8OR-01A	75	female	white	MX	N0 (i-)	T1c	40	0	Lymphocyte Depleted (Immune C4)
TCGA-AC-A8OS-01A	71	female	white	MX	N0 (i-)	T2	70	0	Inflammatory (Immune C3)
TCGA-AN-A03X-01A	74	female	white	M0	N0	T2	10	0	Wound Healing (Immune C1)
TCGA-AN-A03Y-01A	66	female	white	M0	N0	T2	10	0	Wound Healing (Immune C1)
TCGA-AN-A041-01A	29	female	white	M0	N1a	T2	7	0	Wound Healing (Immune C1)
TCGA-AN-A046-01A	68	female	white	M0	N0	T2	10	0	IFN-gamma Dominant (Immune C2)
TCGA-AN-A049-01A	62	female	white	M0	N0	T2	19	0	IFN-gamma Dominant (Immune C2)
TCGA-AN-A04A-01A	36	female	white	M0	N2	T2	90	0	Wound Healing (Immune C1)
TCGA-AN-A04C-01A	51	female	white	M0	N1	T2	54	0	Wound Healing (Immune C1)
TCGA-AN-A04D-01A	58	female	white	M0	N1	T2	52	0	Wound Healing (Immune C1)
TCGA-AN-A0AJ-01A	79	female	white	M0	N0	T3	303	0	IFN-gamma Dominant (Immune C2)
TCGA-AN-A0AK-01A	76	female	white	M0	N0	T2	224	0	Wound Healing (Immune C1)
TCGA-AN-A0AL-01A	41	female	white	M0	N0	T4	227	0	IFN-gamma Dominant (Immune C2)
TCGA-AN-A0AM-01A	56	female	white	M0	N0	T2	5	0	IFN-gamma Dominant (Immune C2)
TCGA-AN-A0AR-01A	55	female	white	M0	N0	T2	10	0	Wound Healing (Immune C1)
TCGA-AN-A0AS-01A	70	female	white	M0	N2	T2	10	0	TGF-beta Dominant (Immune C6)
TCGA-AN-A0AT-01A	62	female	white	M0	N0	T2	10	0	Wound Healing (Immune C1)
TCGA-AN-A0FD-01A	71	female	white	M0	N0	T2	196	0	IFN-gamma Dominant (Immune C2)
TCGA-AN-A0FF-01A	32	female	white	M0	N0	T1b	172	0	IFN-gamma Dominant (Immune C2)
TCGA-AN-A0FJ-01A	59	female	white	M1	N2	T2	242	0	Wound Healing (Immune C1)
TCGA-AN-A0FK-01A	88	female	white	M0	N0	T4	213	0	Wound Healing (Immune C1)
TCGA-AN-A0FL-01A	62	female	white	M0	N0	T2	231	0	IFN-gamma Dominant (Immune C2)
TCGA-AN-A0FN-01A	61	female	white	M0	N0	T1c	218	0	TGF-beta Dominant (Immune C6)
TCGA-AN-A0FS-01A	55	female	white	M0	N0	T1c	210	0	Wound Healing (Immune C1)
TCGA-AN-A0FT-01A	63	female	white	M0	N1	T2	214	0	Wound Healing (Immune C1)
TCGA-AN-A0FV-01A	58	female	white	M0	N0	T2	10	0	Lymphocyte Depleted (Immune C4)
TCGA-AN-A0FW-01A	67	female	white	M0	N2	T2	11	0	Wound Healing (Immune C1)
TCGA-AN-A0FX-01A	52	female	white	M0	N0	T2	10	0	Wound Healing (Immune C1)
TCGA-AN-A0FY-01A	55	female	white	M0	N0	T1c	10	0	Wound Healing (Immune C1)
TCGA-AN-A0FZ-01A	45	female	white	M0	N2	T2	10	0	Wound Healing (Immune C1)
TCGA-AN-A0G0-01A	56	female	white	M0	N0	T2	16	0	Wound Healing (Immune C1)
TCGA-AN-A0XL-01A	61	female	white	M0	N0	T2	163	0	Wound Healing (Immune C1)
TCGA-AN-A0XN-01A	68	female	white	M0	N2	T2	10	0	TGF-beta Dominant (Immune C6)
TCGA-AN-A0XO-01A	59	female	white	M0	N2	T2	375	0	Wound Healing (Immune C1)
TCGA-AN-A0XP-01A	69	female	white	M0	N2	T2	9	0	IFN-gamma Dominant (Immune C2)
TCGA-AN-A0XR-01A	55	female	white	M0	N2	T2	10	0	IFN-gamma Dominant (Immune C2)
TCGA-AN-A0XS-01A	63	female	white	M0	N2	T2	10	0	Inflammatory (Immune C3)
TCGA-AN-A0XT-01A	54	female	white	M0	N2	T2	10	0	Inflammatory (Immune C3)
TCGA-AN-A0XU-01A	54	female	white	M0	N0	T2	10	0	Wound Healing (Immune C1)
TCGA-AN-A0XV-01A	67	female	white	M0	N2	T2	162	0	Wound Healing (Immune C1)
TCGA-AN-A0XW-01A	36	female	white	M0	N2	T2	170	0	Wound Healing (Immune C1)
TCGA-AO-A03L-01A	34	female	asian	M0	N2	T3	2442	0	IFN-gamma Dominant (Immune C2)
TCGA-AO-A03O-01A	69	female	black or african american	M0	N0 (i-)	T2	2483	1	IFN-gamma Dominant (Immune C2)
TCGA-AO-A03P-01A	54	female	black or african american	M0	N1	T2	2911	1	IFN-gamma Dominant (Immune C2)
TCGA-AO-A03R-01A	57	female	white	M0	N1a	T2	2091	0	Wound Healing (Immune C1)
TCGA-AO-A03T-01A	42	female	white	M0	N1a	T2	2124	0	IFN-gamma Dominant (Immune C2)
TCGA-AO-A03V-01A	41	female	white	M0	N0 (i-)	T1c	1351	0	Wound Healing (Immune C1)
TCGA-AO-A0J2-01A	41	female	white	M0	N0 (i-)	T1c	997	0	IFN-gamma Dominant (Immune C2)
TCGA-AO-A0J3-01A	67	female	white	M0	N1b	T2	651	0	Lymphocyte Depleted (Immune C4)
TCGA-AO-A0J4-01A	41	female	black or african american	M0	N0 (i-)	T1c	1587	0	IFN-gamma Dominant (Immune C2)
TCGA-AO-A0J5-01A	48	female	white	M1	N1a	T4	792	1	Wound Healing (Immune C1)
TCGA-AO-A0J6-01A	61	female	white	M0	N0 (i-)	T2	1140	0	IFN-gamma Dominant (Immune C2)
TCGA-AO-A0J7-01A	71	female	white	M0	N1	T2	618	0	Wound Healing (Immune C1)
TCGA-AO-A0J8-01A	61	female	white	M0	N0 (i+)	T2	680	0	IFN-gamma Dominant (Immune C2)
TCGA-AO-A0J9-01A	61	female	white	M0	N3	T2	1613	0	Wound Healing (Immune C1)
TCGA-AO-A0JA-01A	36	female	black or african american	M0	N3	T2	655	0	Wound Healing (Immune C1)
TCGA-AO-A0JB-01A	50	female	white	M0	N1a	T3	1542	0	Wound Healing (Immune C1)
TCGA-AO-A0JC-01A	64	female	white	M0	N0 (i-)	T2	1547	0	IFN-gamma Dominant (Immune C2)
TCGA-AO-A0JD-01A	59	female	white	M0	N1a	T3	2190	0	IFN-gamma Dominant (Immune C2)
TCGA-AO-A0JE-01A	53	female	black or african american	M0	N2a	T2	2335	0	IFN-gamma Dominant (Immune C2)
TCGA-AO-A0JF-01A	68	female	white	M0	N1a	T1c	1980	0	Inflammatory (Immune C3)
TCGA-AO-A0JG-01A	49	female	white	M0	N2a	T2	798	0	Inflammatory (Immune C3)
TCGA-AO-A0JI-01A	56	female	white	M0	N1	T1c	1528	0	Lymphocyte Depleted (Immune C4)
TCGA-AO-A0JJ-01A	54	female	white	M0	N1a	T2	1887	0	TGF-beta Dominant (Immune C6)
TCGA-AO-A0JL-01A	59	female	white	M0	N2a	T2	1683	0	Wound Healing (Immune C1)
TCGA-AO-A0JM-01A	40	female	not reported	M0	N1	T2	2184	0	IFN-gamma Dominant (Immune C2)
TCGA-AO-A124-01A	38	female	white	M0	N0 (i-)	T2	3506	0	IFN-gamma Dominant (Immune C2)
TCGA-AO-A125-01A	72	female	black or african american	M0	N0 (i-)	T2	3456	0	Inflammatory (Immune C3)
TCGA-AO-A126-01A	39	female	asian	M0	N0 (i-)	T2	3307	0	Wound Healing (Immune C1)
TCGA-AO-A128-01A	61	female	white	M0	N0 (i-)	T2	3248	0	IFN-gamma Dominant (Immune C2)
TCGA-AO-A129-01A	29	female	white	M0	N1a	T2	3286	0	IFN-gamma Dominant (Immune C2)
TCGA-AO-A12A-01A	47	female	white	M0	N0 (i+)	T2	3112	0	Wound Healing (Immune C1)
TCGA-AO-A12B-01A	63	female	white	M0	N0 (i-)	T2	2989	0	Lymphocyte Depleted (Immune C4)
TCGA-AO-A12C-01A	42	female	white	M0	N1a	T2	2372	0	Wound Healing (Immune C1)
TCGA-AO-A12D-01A	43	female	white	M0	N1a	T1c	2515	0	IFN-gamma Dominant (Immune C2)
TCGA-AO-A12E-01A	51	female	white	M0	N0 (i+)	T3	2142	0	Lymphocyte Depleted (Immune C4)
TCGA-AO-A12F-01A	36	female	white	M0	N0 (i-)	T2	1842	0	Wound Healing (Immune C1)
TCGA-AO-A12G-01A	75	female	white	M0	N0 (i+)	T2	1639	0	Wound Healing (Immune C1)
TCGA-AO-A12H-01A	69	female	black or african american	M0	N0 (i-)	T2	1234	0	Lymphocyte Depleted (Immune C4)
TCGA-AO-A1KO-01A	46	female	white	M0	N0 (i+)	T3	622	0	Inflammatory (Immune C3)
TCGA-AO-A1KP-01A	77	female	white	M0	N1	T1	2953	0	Wound Healing (Immune C1)
TCGA-AO-A1KQ-01A	84	male	white	M0	N1	T4	1882	0	IFN-gamma Dominant (Immune C2)
TCGA-AO-A1KR-01A	51	female	white	M0	N0	T2	2513	0	IFN-gamma Dominant (Immune C2)
TCGA-AO-A1KS-01A	69	female	white	M0	N0 (i-)	T2	350	0	Lymphocyte Depleted (Immune C4)
TCGA-AO-A1KT-01A	78	female	white	M0	N1	T1	541	0	Wound Healing (Immune C1)
TCGA-AQ-A04J-01A	45	female	white	M0	N0 (i+)	T2	819	0	Wound Healing (Immune C1)
TCGA-AQ-A0Y5-01A	70	female	white	MX	N2a	T2	172	1	Lymphocyte Depleted (Immune C4)
TCGA-AQ-A1H2-01A	84	female	white	MX	N2a	T2	475	0	Lymphocyte Depleted (Immune C4)
TCGA-AQ-A1H3-01A	49	female	white	MX	N3a	T2	989	0	Wound Healing (Immune C1)
TCGA-AQ-A54N-01A	51	female	black or african american	M0	N0	T2	78	0	Lymphocyte Depleted (Immune C4)
TCGA-AQ-A54O-01A	51	male	black or african american	M0	N0	T2	1001	0	Wound Healing (Immune C1)
TCGA-AQ-A7U7-01A	55	female	white	M0	N2a	T2	584	1	IFN-gamma Dominant (Immune C2)
TCGA-AR-A0TP-01A	43	female	white	M0	N0	T2	4275	0	Wound Healing (Immune C1)
TCGA-AR-A0TQ-01A	27	female	white	M0	N1	T3	2991	0	IFN-gamma Dominant (Immune C2)
TCGA-AR-A0TR-01A	68	female	white	M0	N1	T2	160	1	Inflammatory (Immune C3)
TCGA-AR-A0TS-01A	46	female	white	M0	N1	T2	2558	0	IFN-gamma Dominant (Immune C2)
TCGA-AR-A0TT-01A	53	female	black or african american	M0	N2	T2	3316	0	TGF-beta Dominant (Immune C6)
TCGA-AR-A0TU-01A	35	female	not reported	M0	N0	T2	709	0	IFN-gamma Dominant (Immune C2)
TCGA-AR-A0TV-01A	66	female	not reported	M0	N0	T2	2288	0	IFN-gamma Dominant (Immune C2)
TCGA-AR-A0TW-01A	50	female	white	M0	N1	T3	3009	0	IFN-gamma Dominant (Immune C2)
TCGA-AR-A0TX-01A	64	female	not reported	M0	N1	T1	1972	0	Inflammatory (Immune C3)
TCGA-AR-A0TY-01A	54	female	white	M0	N0	T2	1699	1	Wound Healing (Immune C1)
TCGA-AR-A0TZ-01A	43	female	white	M1	N2	T2	3262	1	Wound Healing (Immune C1)
TCGA-AR-A0U0-01A	73	female	white	M0	N1	T2	1988	0	IFN-gamma Dominant (Immune C2)
TCGA-AR-A0U2-01A	47	female	white	M0	N2	T2	2551	1	Inflammatory (Immune C3)
TCGA-AR-A0U3-01A	59	female	white	M0	N1	T2	4080	0	Wound Healing (Immune C1)
TCGA-AR-A0U4-01A	54	female	white	M0	N0	T2	3261	0	Lymphocyte Depleted (Immune C4)
TCGA-AR-A1AH-01A	51	female	white	M0	N1	T2	3807	0	Wound Healing (Immune C1)
TCGA-AR-A1AI-01A	47	female	white	M0	N0	T2	3296	0	IFN-gamma Dominant (Immune C2)
TCGA-AR-A1AJ-01A	83	female	white	M0	N0	T1	2383	0	IFN-gamma Dominant (Immune C2)
TCGA-AR-A1AK-01A	70	female	white	M0	N0	T1	3159	0	IFN-gamma Dominant (Immune C2)
TCGA-AR-A1AL-01A	60	female	white	M0	N1	T3	2971	0	Inflammatory (Immune C3)
TCGA-AR-A1AM-01A	52	female	white	M0	N1	T3	2991	0	Wound Healing (Immune C1)
TCGA-AR-A1AN-01A	46	female	white	M0	N0	T2	2920	0	Wound Healing (Immune C1)
TCGA-AR-A1AO-01A	47	female	white	M0	N1	T1	2618	0	IFN-gamma Dominant (Immune C2)
TCGA-AR-A1AP-01A	80	female	white	M0	N0	T1	2856	0	IFN-gamma Dominant (Immune C2)
TCGA-AR-A1AQ-01A	49	female	white	M0	N0	T2	3021	0	IFN-gamma Dominant (Immune C2)
TCGA-AR-A1AR-01A	50	female	white	M0	N2	T1	524	1	IFN-gamma Dominant (Immune C2)
TCGA-AR-A1AS-01A	54	female	asian	M0	N1	T2	1150	0	Lymphocyte Depleted (Immune C4)
TCGA-AR-A1AT-01A	62	female	white	M0	N0	T2	1272	1	IFN-gamma Dominant (Immune C2)
TCGA-AR-A1AU-01A	39	female	white	M0	N2	T2	2868	0	Wound Healing (Immune C1)
TCGA-AR-A1AV-01A	68	male	white	M0	N1	T2	1864	0	Lymphocyte Depleted (Immune C4)
TCGA-AR-A1AW-01A	65	female	white	M0	N0	T2	2632	0	IFN-gamma Dominant (Immune C2)
TCGA-AR-A1AX-01A	64	female	white	M0	N0	T1	2629	0	IFN-gamma Dominant (Immune C2)
TCGA-AR-A1AY-01A	65	female	white	M0	N0	T1	1026	0	Wound Healing (Immune C1)
TCGA-AR-A24H-01A	65	female	white	M0	N0	T2	4894	0	IFN-gamma Dominant (Immune C2)
TCGA-AR-A24K-01A	46	female	white	M0	N0	T2	1548	0	Wound Healing (Immune C1)
TCGA-AR-A24L-01A	26	female	white	M0	N1	T2	2866	1	IFN-gamma Dominant (Immune C2)
TCGA-AR-A24M-01A	38	female	white	M0	N2	T2	3660	0	TGF-beta Dominant (Immune C6)
TCGA-AR-A24N-01A	54	female	white	M0	N0	T1	3035	0	IFN-gamma Dominant (Immune C2)
TCGA-AR-A24O-01A	43	female	white	M0	N2	T3	3607	0	IFN-gamma Dominant (Immune C2)
TCGA-AR-A24P-01A	47	female	white	M0	N0	T1	84	0	Wound Healing (Immune C1)
TCGA-AR-A24Q-01A	49	female	white	M0	N0	T3	3172	0	Wound Healing (Immune C1)
TCGA-AR-A24R-01A	45	female	white	M0	N2	T1	3430	0	IFN-gamma Dominant (Immune C2)
TCGA-AR-A24S-01A	61	female	white	M0	N0	T1	2976	0	IFN-gamma Dominant (Immune C2)
TCGA-AR-A24T-01A	46	female	white	M0	N3	T3	3202	0	TGF-beta Dominant (Immune C6)
TCGA-AR-A24U-01A	47	female	white	M0	N1	T1	3128	0	IFN-gamma Dominant (Immune C2)
TCGA-AR-A24V-01A	52	female	white	M0	N1	T2	3203	0	IFN-gamma Dominant (Immune C2)
TCGA-AR-A24W-01A	55	female	white	M0	N1	T2	1550	0	Inflammatory (Immune C3)
TCGA-AR-A24X-01A	52	female	white	M0	N0	T2	3004	0	Wound Healing (Immune C1)
TCGA-AR-A24Z-01A	57	female	white	M0	N0	T2	3001	0	IFN-gamma Dominant (Immune C2)
TCGA-AR-A250-01A	58	female	white	M0	N0	T2	2707	0	Wound Healing (Immune C1)
TCGA-AR-A251-01A	51	female	white	M0	N2	T2	3030	0	Wound Healing (Immune C1)
TCGA-AR-A252-01A	50	female	white	M0	N0	T1	2838	0	IFN-gamma Dominant (Immune C2)
TCGA-AR-A254-01A	50	female	white	M0	N2	T2	2605	0	TGF-beta Dominant (Immune C6)
TCGA-AR-A255-01A	62	female	white	M0	N0	T1	2161	0	IFN-gamma Dominant (Immune C2)
TCGA-AR-A256-01A	45	female	white	M0	N0	T2	2854	1	IFN-gamma Dominant (Immune C2)
TCGA-AR-A2LE-01A	69	female	white	M0	N0	T1	5062	0	Inflammatory (Immune C3)
TCGA-AR-A2LH-01A	55	female	white	M0	N3	T3	616	1	IFN-gamma Dominant (Immune C2)
TCGA-AR-A2LJ-01A	40	female	white	MX	N1	T3	2632	0	TGF-beta Dominant (Immune C6)
TCGA-AR-A2LK-01A	62	female	white	M0	N2	T3	1649	1	Wound Healing (Immune C1)
TCGA-AR-A2LL-01A	70	female	white	M0	N0	T3	2012	0	#N/A
TCGA-AR-A2LM-01A	49	female	white	M0	N1	T1	1935	0	Inflammatory (Immune C3)
TCGA-AR-A2LN-01A	65	female	white	M0	N0	T2	1161	0	Inflammatory (Immune C3)
TCGA-AR-A2LO-01A	46	female	white	M0	N1	T2	1198	0	Inflammatory (Immune C3)
TCGA-AR-A2LQ-01A	59	female	white	M0	N0	T3	1233	0	Inflammatory (Immune C3)
TCGA-AR-A2LR-01A	49	female	white	M0	N0	T1	1742	0	#N/A
TCGA-AR-A5QM-01A	62	female	white	M0	N0	T2	2231	0	TGF-beta Dominant (Immune C6)
TCGA-AR-A5QN-01A	68	female	white	M0	N3	T2	1013	0	IFN-gamma Dominant (Immune C2)
TCGA-AR-A5QP-01A	54	female	white	M0	N1	T2	1185	0	Wound Healing (Immune C1)
TCGA-AR-A5QQ-01A	68	female	white	M0	N1	T3	322	1	IFN-gamma Dominant (Immune C2)
TCGA-B6-A0I1-01A	73	female	black or african american	M0	N0	T2	2361	1	IFN-gamma Dominant (Immune C2)
TCGA-B6-A0I2-01A	45	female	white	M0	N0 (i-)	T1c	4361	0	IFN-gamma Dominant (Immune C2)
TCGA-B6-A0I5-01A	49	female	white	M0	N1b	T2	8556	0	Wound Healing (Immune C1)
TCGA-B6-A0I6-01A	49	female	black or african american	M0	N1	T1c	991	1	Wound Healing (Immune C1)
TCGA-B6-A0I8-01A	46	female	white	M0	NX	T1	749	1	Inflammatory (Immune C3)
TCGA-B6-A0I9-01A	62	female	white	M1	NX	T3	362	1	Wound Healing (Immune C1)
TCGA-B6-A0IA-01A	51	female	white	M0	N0 (i-)	T2	8391	0	Lymphocyte Depleted (Immune C4)
TCGA-B6-A0IB-01A	64	female	white	M1	N3	T3	3941	1	Wound Healing (Immune C1)
TCGA-B6-A0IC-01A	90	female	white	MX	NX	T2	1329	0	Inflammatory (Immune C3)
TCGA-B6-A0IE-01A	38	female	black or african american	M0	N1b	T3	1993	1	Wound Healing (Immune C1)
TCGA-B6-A0IG-01A	50	female	white	M0	N1b	T2	4456	1	IFN-gamma Dominant (Immune C2)
TCGA-B6-A0IH-01A	81	female	white	M0	N1b	T3	2965	1	Inflammatory (Immune C3)
TCGA-B6-A0IJ-01A	42	female	black or african american	M0	N0 (i-)	T3	7106	0	IFN-gamma Dominant (Immune C2)
TCGA-B6-A0IK-01A	63	female	white	M0	N1	T4	571	1	Wound Healing (Immune C1)
TCGA-B6-A0IM-01A	75	female	black or african american	M0	N0 (i-)	T3	3873	1	Wound Healing (Immune C1)
TCGA-B6-A0IN-01A	45	female	white	MX	NX	T1c	2573	1	Wound Healing (Immune C1)
TCGA-B6-A0IO-01A	66	female	white	M0	N0 (i-)	T2	5042	0	Wound Healing (Immune C1)
TCGA-B6-A0IP-01A	74	female	white	M0	N0 (i-)	T1c	3926	1	Inflammatory (Immune C3)
TCGA-B6-A0IQ-01A	40	female	white	M0	N1b	T3	4285	0	Wound Healing (Immune C1)
TCGA-B6-A0RE-01A	61	female	black or african american	M0	N0 (i-)	TX	7777	0	Wound Healing (Immune C1)
TCGA-B6-A0RG-01A	26	female	white	M0	N0 (i-)	T3	2082	0	IFN-gamma Dominant (Immune C2)
TCGA-B6-A0RH-01A	51	female	black or african american	M0	N0 (i-)	T2	6456	1	IFN-gamma Dominant (Immune C2)
TCGA-B6-A0RI-01A	44	female	white	M0	N1b	T4b	7126	0	Wound Healing (Immune C1)
TCGA-B6-A0RL-01A	60	female	black or african american	M0	N0 (i-)	T2	2469	1	Lymphocyte Depleted (Immune C4)
TCGA-B6-A0RM-01A	57	female	black or african american	MX	NX	TX	2373	1	Inflammatory (Immune C3)
TCGA-B6-A0RN-01A	60	female	white	M0	N0 (i-)	T1c	8008	0	Inflammatory (Immune C3)
TCGA-B6-A0RO-01A	71	female	white	M0	N1a	T4	4929	0	IFN-gamma Dominant (Immune C2)
TCGA-B6-A0RP-01A	73	female	white	M0	N1b	T2	3126	1	Inflammatory (Immune C3)
TCGA-B6-A0RQ-01A	68	female	white	M0	N0 (i-)	T3	4267	1	Inflammatory (Immune C3)
TCGA-B6-A0RS-01A	38	female	white	M0	N0 (i-)	T2	3063	1	Wound Healing (Immune C1)
TCGA-B6-A0RT-01A	39	female	white	M0	N1	T3	2721	0	IFN-gamma Dominant (Immune C2)
TCGA-B6-A0RU-01A	40	female	white	M0	N0 (i-)	T1c	8605	0	Wound Healing (Immune C1)
TCGA-B6-A0RV-01A	42	female	white	M0	N2	T3	5156	0	IFN-gamma Dominant (Immune C2)
TCGA-B6-A0WS-01A	58	female	black or african american	MX	NX	T1c	2965	1	IFN-gamma Dominant (Immune C2)
TCGA-B6-A0WT-01A	61	female	white	M0	N1	T2	5739	0	Wound Healing (Immune C1)
TCGA-B6-A0WV-01A	67	female	white	M0	N1b	T2	2417	1	Wound Healing (Immune C1)
TCGA-B6-A0WW-01A	58	female	black or african american	MX	N1b	T2	558	1	IFN-gamma Dominant (Immune C2)
TCGA-B6-A0WX-01A	40	female	black or african american	M0	N1b	T3	639	1	Wound Healing (Immune C1)
TCGA-B6-A0WY-01A	40	female	white	M0	N1b	T3	3461	1	IFN-gamma Dominant (Immune C2)
TCGA-B6-A0WZ-01A	50	female	black or african american	M0	N1b	T2	6292	0	IFN-gamma Dominant (Immune C2)
TCGA-B6-A0X0-01A	54	female	white	M0	N0 (i-)	T1c	3945	1	Inflammatory (Immune C3)
TCGA-B6-A0X1-01A	48	female	white	M1	N1	T2	7455	1	IFN-gamma Dominant (Immune C2)
TCGA-B6-A0X4-01A	62	female	white	M0	N1b	T2	860	1	Lymphocyte Depleted (Immune C4)
TCGA-B6-A0X5-01A	61	female	black or african american	M0	N1b	T2	2097	1	Lymphocyte Depleted (Immune C4)
TCGA-B6-A0X7-01A	62	female	white	MX	NX	T1c	1781	1	IFN-gamma Dominant (Immune C2)
TCGA-B6-A1KF-01A	68	female	white	M0	N1	T2	3088	0	Wound Healing (Immune C1)
TCGA-B6-A1KI-01A	63	female	white	M0	N0	T1c	2236	0	Inflammatory (Immune C3)
TCGA-B6-A1KN-01A	57	female	white	M0	N1	T4b	4233	0	IFN-gamma Dominant (Immune C2)
TCGA-B6-A2IU-01A	62	female	white	M0	N0	T2	5176	0	Inflammatory (Immune C3)
TCGA-B6-A3ZX-01A	50	female	black or african american	M1	N1	T3	1152	1	IFN-gamma Dominant (Immune C2)
TCGA-B6-A400-01A	43	female	black or african american	M0	N2a	T2	215	0	IFN-gamma Dominant (Immune C2)
TCGA-B6-A401-01A	47	female	black or african american	M0	N1a	T1c	2596	0	Wound Healing (Immune C1)
TCGA-B6-A402-01A	47	female	black or african american	M0	N0 (i-)	T1c	2281	0	Wound Healing (Immune C1)
TCGA-B6-A408-01A	55	female	black or african american	M0	N3a	T2	2072	0	IFN-gamma Dominant (Immune C2)
TCGA-B6-A409-01A	44	female	black or african american	M0	N2a	T1c	573	1	IFN-gamma Dominant (Immune C2)
TCGA-B6-A40B-01A	76	female	white	M0	N0 (i-)	T1b	3152	0	Wound Healing (Immune C1)
TCGA-B6-A40C-01A	51	female	white	M0	N0 (i-)	T3	2164	0	Wound Healing (Immune C1)
TCGA-BH-A0AU-01A	45	female	white	M0	N0	T2	1914	0	IFN-gamma Dominant (Immune C2)
TCGA-BH-A0AU-11A	45	female	white	M0	N0	T2	1914	0	#N/A
TCGA-BH-A0AV-01A	52	female	black or african american	M0	N0	T1c	1820	0	Wound Healing (Immune C1)
TCGA-BH-A0AW-01A	56	female	white	M0	N1a	T1c	622	0	IFN-gamma Dominant (Immune C2)
TCGA-BH-A0AY-01A	62	female	white	M0	N0 (i-)	T2	777	0	Wound Healing (Immune C1)
TCGA-BH-A0AY-11A	62	female	white	M0	N0 (i-)	T2	777	0	#N/A
TCGA-BH-A0AZ-01A	47	female	white	cM0 (i+)	N1a	T3	1919	0	Wound Healing (Immune C1)
TCGA-BH-A0AZ-11A	47	female	white	cM0 (i+)	N1a	T3	1919	0	#N/A
TCGA-BH-A0B0-01A	56	female	black or african american	M0	N0	T1c	2477	0	IFN-gamma Dominant (Immune C2)
TCGA-BH-A0B1-01A	66	female	white	M0	N1a	T2	1148	0	IFN-gamma Dominant (Immune C2)
TCGA-BH-A0B2-01A							1201	0	IFN-gamma Dominant (Immune C2)
TCGA-BH-A0B2-11A							1201	0	#N/A
TCGA-BH-A0B3-01A	53	female	white	M0	N1a	T2	1203	0	IFN-gamma Dominant (Immune C2)
TCGA-BH-A0B3-11B	53	female	white	M0	N1a	T2	1203	0	#N/A
TCGA-BH-A0B4-01A	65	male	white	M0	N2	T2	1191	0	Wound Healing (Immune C1)
TCGA-BH-A0B5-01A	40	female	white	M0	N2a	T2	2136	0	Wound Healing (Immune C1)
TCGA-BH-A0B5-11A	40	female	white	M0	N2a	T2	2136	0	#N/A
TCGA-BH-A0B6-01A	47	female	white	M0	N0	T1c	2483	0	#N/A
TCGA-BH-A0B7-01A	42	female	white	M0	N1a	T2	2559	0	Wound Healing (Immune C1)
TCGA-BH-A0B7-11A	42	female	white	M0	N1a	T2	2559	0	#N/A
TCGA-BH-A0B8-01A	64	female	white	M0	N0 (i-)	T1b	1569	0	Wound Healing (Immune C1)
TCGA-BH-A0B8-11A	64	female	white	M0	N0 (i-)	T1b	1569	0	#N/A
TCGA-BH-A0B9-01A	44	female	white	M0	N0 (i-)	T1c	1572	0	IFN-gamma Dominant (Immune C2)
TCGA-BH-A0BA-01A	51	female	white	M0	N3a	T3	1132	0	Inflammatory (Immune C3)
TCGA-BH-A0BA-11A	51	female	white	M0	N3a	T3	1132	0	#N/A
TCGA-BH-A0BC-01A	60	female	white	M0	N3	T2	974	0	IFN-gamma Dominant (Immune C2)
TCGA-BH-A0BC-11A	60	female	white	M0	N3	T2	974	0	#N/A
TCGA-BH-A0BD-01A	47	female	white	M0	N1a	T1c	554	0	IFN-gamma Dominant (Immune C2)
TCGA-BH-A0BF-01A	56	female	white	M0	N1mi	T2	1324	1	IFN-gamma Dominant (Immune C2)
TCGA-BH-A0BF-11A	56	female	white	M0	N1mi	T2	1324	1	#N/A
TCGA-BH-A0BG-01A	73	female	white	M0	N0	T1	1871	0	IFN-gamma Dominant (Immune C2)
TCGA-BH-A0BJ-01A	41	female	white	M0	N1a	T2	660	0	Inflammatory (Immune C3)
TCGA-BH-A0BJ-11A	41	female	white	M0	N1a	T2	660	0	#N/A
TCGA-BH-A0BL-01A	35	female	white	M0	N0	T1c	2278	0	Wound Healing (Immune C1)
TCGA-BH-A0BL-11A	35	female	white	M0	N0	T1c	2278	0	#N/A
TCGA-BH-A0BM-01A	54	female	white	M0	N1a	T2	1876	0	Inflammatory (Immune C3)
TCGA-BH-A0BM-11A	54	female	white	M0	N1a	T2	1876	0	#N/A
TCGA-BH-A0BO-01A	54	female	white	M0	N0	T1b	2197	0	Inflammatory (Immune C3)
TCGA-BH-A0BO-11A	54	female	white	M0	N0	T1b	2197	0	#N/A
TCGA-BH-A0BP-01A	76	female	white	M0	N0	T1c	2296	1	Wound Healing (Immune C1)
TCGA-BH-A0BQ-01A	39	female	white	M0	N0	T1c	2255	0	IFN-gamma Dominant (Immune C2)
TCGA-BH-A0BQ-11A	39	female	white	M0	N0	T1c	2255	0	#N/A
TCGA-BH-A0BR-01A	59	female	white	M0	N0	T1c	2330	0	Wound Healing (Immune C1)
TCGA-BH-A0BS-01A	55	female	white	M0	N1c	T3	2612	0	Lymphocyte Depleted (Immune C4)
TCGA-BH-A0BS-11A	55	female	white	M0	N1c	T3	2612	0	#N/A
TCGA-BH-A0BT-01A	56	female	white	M0	N1mi	T1c	2365	0	IFN-gamma Dominant (Immune C2)
TCGA-BH-A0BT-11A	56	female	white	M0	N1mi	T1c	2365	0	#N/A
TCGA-BH-A0BV-01A	78	female	white	M0	N1a	T2	1519	0	IFN-gamma Dominant (Immune C2)
TCGA-BH-A0BV-11A	78	female	white	M0	N1a	T2	1519	0	#N/A
TCGA-BH-A0BW-01A	71	female	black or african american	M0	N0	T1c	2371	0	IFN-gamma Dominant (Immune C2)
TCGA-BH-A0BW-11A	71	female	black or african american	M0	N0	T1c	2371	0	#N/A
TCGA-BH-A0BZ-01A	59	female	white	M0	N1a	T3	2255	0	IFN-gamma Dominant (Immune C2)
TCGA-BH-A0BZ-11A	59	female	white	M0	N1a	T3	2255	0	#N/A
TCGA-BH-A0C0-01A	62	female	white	M0	N1a	T1c	1270	0	IFN-gamma Dominant (Immune C2)
TCGA-BH-A0C0-11A	62	female	white	M0	N1a	T1c	1270	0	#N/A
TCGA-BH-A0C3-01A	47	female	white	M0	N0	T1c	2709	0	IFN-gamma Dominant (Immune C2)
TCGA-BH-A0C3-11A	47	female	white	M0	N0	T1c	2709	0	#N/A
TCGA-BH-A0DD-01A	58	male	white	M0	N1a	T2	2486	0	IFN-gamma Dominant (Immune C2)
TCGA-BH-A0DD-11A	58	male	white	M0	N1a	T2	2486	0	#N/A
TCGA-BH-A0DE-01A	62	female	white	M0	N0	T2	2372	0	TGF-beta Dominant (Immune C6)
TCGA-BH-A0DE-11A	62	female	white	M0	N0	T2	2372	0	#N/A
TCGA-BH-A0DG-01A	30	female	black or african american	M0	N0	T2	2041	0	IFN-gamma Dominant (Immune C2)
TCGA-BH-A0DG-11A	30	female	black or african american	M0	N0	T2	2041	0	#N/A
TCGA-BH-A0DH-01A	63	female	white	M0	N1a	T2	1156	0	Wound Healing (Immune C1)
TCGA-BH-A0DH-11A	63	female	white	M0	N1a	T2	1156	0	#N/A
TCGA-BH-A0DI-01A	63	female	white	M0	N1a	T2	912	0	Wound Healing (Immune C1)
TCGA-BH-A0DI-11A	63	female	white	M0	N1a	T2	912	0	#N/A
TCGA-BH-A0DK-01A	49	female	white	M0	N0 (i-)	T2	423	0	IFN-gamma Dominant (Immune C2)
TCGA-BH-A0DK-11A	49	female	white	M0	N0 (i-)	T2	423	0	#N/A
TCGA-BH-A0DL-01A	64	female	white	M0	N0	T2	2381	0	IFN-gamma Dominant (Immune C2)
TCGA-BH-A0DL-11A	64	female	white	M0	N0	T2	2381	0	#N/A
TCGA-BH-A0DP-01A	60	female	white	M0	N0 (i-)	T3	476	0	Inflammatory (Immune C3)
TCGA-BH-A0DP-11A	60	female	white	M0	N0 (i-)	T3	476	0	#N/A
TCGA-BH-A0DQ-01A	42	female	white	M0	N1	T2	98	0	IFN-gamma Dominant (Immune C2)
TCGA-BH-A0DQ-11A	42	female	white	M0	N1	T2	98	0	#N/A
TCGA-BH-A0DS-01A	71	female	white	M0	N2a	T2	78	0	Inflammatory (Immune C3)
TCGA-BH-A0DT-01A	41	female	white	M0	N1a	T1c	2403	0	Inflammatory (Immune C3)
TCGA-BH-A0DT-11A	41	female	white	M0	N1a	T1c	2403	0	#N/A
TCGA-BH-A0DV-01A	54	female	white	M0	N2a	T2	2064	0	Inflammatory (Immune C3)
TCGA-BH-A0DV-11A	54	female	white	M0	N2a	T2	2064	0	#N/A
TCGA-BH-A0DX-01A	62	female	white	M0	N0	T1b	2156	0	TGF-beta Dominant (Immune C6)
TCGA-BH-A0DZ-01A	43	female	white	M0	N1a	T2	495	0	Wound Healing (Immune C1)
TCGA-BH-A0DZ-11A	43	female	white	M0	N1a	T2	495	0	#N/A
TCGA-BH-A0E0-01A	38	female	white	M0	N3a	T3	134	0	Wound Healing (Immune C1)
TCGA-BH-A0E0-11A	38	female	white	M0	N3a	T3	134	0	#N/A
TCGA-BH-A0E1-01A	52	female	white	M0	N1	T2	477	0	Wound Healing (Immune C1)
TCGA-BH-A0E1-11A	52	female	white	M0	N1	T2	477	0	#N/A
TCGA-BH-A0E2-01A	49	female	black or african american	M0	N2a	T2	435	0	Wound Healing (Immune C1)
TCGA-BH-A0E6-01A	69	female	white	M0	N0 (i-)	T1c	293	0	Wound Healing (Immune C1)
TCGA-BH-A0E7-01A	79	female	white	M0	N1a	T2	1363	0	Inflammatory (Immune C3)
TCGA-BH-A0EA-01A	72	female	white	M0	N1a	T1c	991	1	Inflammatory (Immune C3)
TCGA-BH-A0EB-01A	69	female	white	M0	N0 (i-)	T1c	745	0	TGF-beta Dominant (Immune C6)
TCGA-BH-A0EE-01A	68	female	white	M0	N0 (i-)	T3	943	0	IFN-gamma Dominant (Immune C2)
TCGA-BH-A0EI-01A	51	female	white	M0	N1a	T1c	1926	0	Wound Healing (Immune C1)
TCGA-BH-A0GY-01A	67	female	white	M0	N1	T2	923	0	IFN-gamma Dominant (Immune C2)
TCGA-BH-A0GZ-01A	62	female	white	M0	N1a	T1c	328	0	Wound Healing (Immune C1)
TCGA-BH-A0H0-01A	69	female	white	M0	N0 (i-)	T1c	461	0	Wound Healing (Immune C1)
TCGA-BH-A0H3-01A	46	female	white	M0	N0	T1c	1928	0	Inflammatory (Immune C3)
TCGA-BH-A0H3-11A	46	female	white	M0	N0	T1c	1928	0	#N/A
TCGA-BH-A0H5-01A	45	female	white	M0	N0 (i-)	T1c	1620	0	TGF-beta Dominant (Immune C6)
TCGA-BH-A0H5-11A	45	female	white	M0	N0 (i-)	T1c	1620	0	#N/A
TCGA-BH-A0H6-01A	82	female	white	M0	NX	T1b	747	0	Wound Healing (Immune C1)
TCGA-BH-A0H7-01A	65	female	white	M0	N2a	T1c	702	0	IFN-gamma Dominant (Immune C2)
TCGA-BH-A0H7-11A	65	female	white	M0	N2a	T1c	702	0	#N/A
TCGA-BH-A0H9-01A	69	female	white	M0	N0 (i-)	T2	1247	0	Wound Healing (Immune C1)
TCGA-BH-A0H9-11A	69	female	white	M0	N0 (i-)	T2	1247	0	#N/A
TCGA-BH-A0HA-01A	31	female	white	M0	N0 (i-)	T1c	1611	0	IFN-gamma Dominant (Immune C2)
TCGA-BH-A0HA-11A	31	female	white	M0	N0 (i-)	T1c	1611	0	#N/A
TCGA-BH-A0HB-01A	55	female	white	M0	N0 (i-)	T1c	806	0	IFN-gamma Dominant (Immune C2)
TCGA-BH-A0HF-01A	77	female	white	M0	N0 (i-)	T1c	727	0	Wound Healing (Immune C1)
TCGA-BH-A0HI-01A	78	female	white	M0	N0 (i-)	T1c	620	0	Wound Healing (Immune C1)
TCGA-BH-A0HK-01A	81	female	white	M0	N1	T2	178	0	Wound Healing (Immune C1)
TCGA-BH-A0HK-11A	81	female	white	M0	N1	T2	178	0	#N/A
TCGA-BH-A0HL-01A	56	female	white	M0	N1a	T2	72	0	Lymphocyte Depleted (Immune C4)
TCGA-BH-A0HN-01A	67	female	white	M0	N0 (i-)	T1c	516	0	Lymphocyte Depleted (Immune C4)
TCGA-BH-A0HO-01A	48	female	white	M0	N1a	T1c	76	0	Lymphocyte Depleted (Immune C4)
TCGA-BH-A0HP-01A	65	female	white	M0	N2a	T3	414	0	Wound Healing (Immune C1)
TCGA-BH-A0HQ-01A	56	female	white	M0	N0 (i+)	T2	1121	0	Wound Healing (Immune C1)
TCGA-BH-A0HU-01A	52	female	white	M0	N0 (i-)	T1c	392	0	Wound Healing (Immune C1)
TCGA-BH-A0HW-01A	62	female	asian	M0	N0 (i-)	T1c	1561	0	Lymphocyte Depleted (Immune C4)
TCGA-BH-A0HX-01A	54	female	white	M0	N1a	T2	829	0	Wound Healing (Immune C1)
TCGA-BH-A0HY-01A	60	female	white	M0	N0	T1c	1545	0	Wound Healing (Immune C1)
TCGA-BH-A0RX-01A	59	female	white	M0	N0 (i-)	T2	170	0	IFN-gamma Dominant (Immune C2)
TCGA-BH-A0W3-01A	58	female	white	M0	N1a	T1c	728	0	Lymphocyte Depleted (Immune C4)
TCGA-BH-A0W4-01A	46	female	white	M0	N0 (i-)	T2	759	0	Wound Healing (Immune C1)
TCGA-BH-A0W5-01A	77	female	white	M0	N1a	T1c	1288	0	Inflammatory (Immune C3)
TCGA-BH-A0W7-01A	49	female	white	M0	N0 (i-)	T1c	1363	0	IFN-gamma Dominant (Immune C2)
TCGA-BH-A0WA-01A	82	female	white	M0	N0 (i-)	T1c	701	0	IFN-gamma Dominant (Immune C2)
TCGA-BH-A18F-01A	50	female	white	M0	N0	T2	1001	0	Wound Healing (Immune C1)
TCGA-BH-A18F-11A	50	female	white	M0	N0	T2	1001	0	#N/A
TCGA-BH-A18G-01A	81	female	white	M0	N0	T1c	149	0	Wound Healing (Immune C1)
TCGA-BH-A18H-01A	63	female	white	M0	N0	T1b	652	0	IFN-gamma Dominant (Immune C2)
TCGA-BH-A18I-01A	53	female	white	cM0 (i+)	N1a	T1c	1093	0	Wound Healing (Immune C1)
TCGA-BH-A18J-01A	56	female	white	M1	N2	T4b	612	1	Lymphocyte Depleted (Immune C4)
TCGA-BH-A18J-11A	56	female	white	M1	N2	T4b	612	1	#N/A
TCGA-BH-A18K-01A	46	female	white	M0	N0	T1	2763	1	Wound Healing (Immune C1)
TCGA-BH-A18K-11A	46	female	white	M0	N0	T1	2763	1	#N/A
TCGA-BH-A18L-01A	50	female	white	M0	N1mi	T3	811	1	Lymphocyte Depleted (Immune C4)
TCGA-BH-A18L-11A	50	female	white	M0	N1mi	T3	811	1	#N/A
TCGA-BH-A18M-01A	39	female	white	M0	N1	T3	2207	1	IFN-gamma Dominant (Immune C2)
TCGA-BH-A18M-11A	39	female	white	M0	N1	T3	2207	1	#N/A
TCGA-BH-A18N-01A	88	female	white	M0	N1b	T2	468	1	Inflammatory (Immune C3)
TCGA-BH-A18N-11A	88	female	white	M0	N1b	T2	468	1	#N/A
TCGA-BH-A18P-01A	60	female	white	M0	N0	T1	921	1	Inflammatory (Immune C3)
TCGA-BH-A18P-11A	60	female	white	M0	N0	T1	921	1	#N/A
TCGA-BH-A18Q-01A	56	female	white	M0	N1b	T2	1692	1	IFN-gamma Dominant (Immune C2)
TCGA-BH-A18Q-11A	56	female	white	M0	N1b	T2	1692	1	#N/A
TCGA-BH-A18R-01A	50	female	white	M0	N1	T2b	1142	1	Wound Healing (Immune C1)
TCGA-BH-A18R-11A	50	female	white	M0	N1	T2b	1142	1	#N/A
TCGA-BH-A18S-01A	79	female	white	M0	N0	T1c	2009	1	Inflammatory (Immune C3)
TCGA-BH-A18S-11A	79	female	white	M0	N0	T1c	2009	1	#N/A
TCGA-BH-A18T-01A	70	female	white	M0	N0	T2	224	1	Wound Healing (Immune C1)
TCGA-BH-A18T-11A	70	female	white	M0	N0	T2	224	1	#N/A
TCGA-BH-A18U-01A	72	female	white	M0	N2a	T2	1563	1	IFN-gamma Dominant (Immune C2)
TCGA-BH-A18U-11A	72	female	white	M0	N2a	T2	1563	1	#N/A
TCGA-BH-A18V-01A	48	female	white	M0	N1b	T2	1556	1	IFN-gamma Dominant (Immune C2)
TCGA-BH-A18V-06A	48	female	white	M0	N1b	T2	1556	1	#N/A
TCGA-BH-A18V-11A	48	female	white	M0	N1b	T2	1556	1	#N/A
TCGA-BH-A1EN-01A	78	female	white	M0	NX	T2	2127	1	Lymphocyte Depleted (Immune C4)
TCGA-BH-A1EN-11A	78	female	white	M0	NX	T2	2127	1	#N/A
TCGA-BH-A1EO-01A	68	female	white	M0	N1	T1c	2798	1	TGF-beta Dominant (Immune C6)
TCGA-BH-A1EO-11A	68	female	white	M0	N1	T1c	2798	1	#N/A
TCGA-BH-A1ES-01A	35	female	white	M0	N1a	T2	3462	1	Wound Healing (Immune C1)
TCGA-BH-A1ES-06A	35	female	white	M0	N1a	T2	3462	1	#N/A
TCGA-BH-A1ES-11A	35	female	white	M0	N1a	T2	3462	1	#N/A
TCGA-BH-A1ET-01A	55	female	white	M0	N0	T1	2520	1	Inflammatory (Immune C3)
TCGA-BH-A1ET-11B	55	female	white	M0	N0	T1	2520	1	#N/A
TCGA-BH-A1EU-01A	83	female	white	M0	N0	T1	1286	1	Inflammatory (Immune C3)
TCGA-BH-A1EU-11A	83	female	white	M0	N0	T1	1286	1	#N/A
TCGA-BH-A1EV-01A	45	female	white	M0	N1b	T3	365	1	Wound Healing (Immune C1)
TCGA-BH-A1EV-11A	45	female	white	M0	N1b	T3	365	1	#N/A
TCGA-BH-A1EW-01A	38	female	white	M0	N1b	T2	1694	1	IFN-gamma Dominant (Immune C2)
TCGA-BH-A1EW-11B	38	female	white	M0	N1b	T2	1694	1	#N/A
TCGA-BH-A1EX-01A	67	female	white	M0	N1b	T2	1508	1	TGF-beta Dominant (Immune C6)
TCGA-BH-A1EX-11A	67	female	white	M0	N1b	T2	1508	1	#N/A
TCGA-BH-A1EY-01A	79	female	white	M0	N0	T2	538	1	Inflammatory (Immune C3)
TCGA-BH-A1EY-11B	79	female	white	M0	N0	T2	538	1	#N/A
TCGA-BH-A1F0-01A	80	female	white	M0	N1c	T1a	785	1	IFN-gamma Dominant (Immune C2)
TCGA-BH-A1F0-11B	80	female	white	M0	N1c	T1a	785	1	#N/A
TCGA-BH-A1F2-01A	53	female	white	M0	N1b	T4b	959	1	Lymphocyte Depleted (Immune C4)
TCGA-BH-A1F2-11A	53	female	white	M0	N1b	T4b	959	1	#N/A
TCGA-BH-A1F5-01A	62	female	white	M0	N1a	T1c	2712	1	#N/A
TCGA-BH-A1F5-11A	62	female	white	M0	N1a	T1c	2712	1	#N/A
TCGA-BH-A1F6-01A	51	female	white	MX	N2a	T4d	2965	1	IFN-gamma Dominant (Immune C2)
TCGA-BH-A1F6-11B	51	female	white	MX	N2a	T4d	2965	1	#N/A
TCGA-BH-A1F8-01A	90	female	white	M0	N2	T4b	1	1	IFN-gamma Dominant (Immune C2)
TCGA-BH-A1F8-11B	90	female	white	M0	N2	T4b	1	1	#N/A
TCGA-BH-A1FB-01A	60	female	white	M0	N1b	T2	3669	1	Inflammatory (Immune C3)
TCGA-BH-A1FB-11A	60	female	white	M0	N1b	T2	3669	1	#N/A
TCGA-BH-A1FC-01A	78	female	black or african american	M0	N1b	T1c	3472	1	IFN-gamma Dominant (Immune C2)
TCGA-BH-A1FC-11A	78	female	black or african american	M0	N1b	T1c	3472	1	#N/A
TCGA-BH-A1FD-01A	68	female	white	M0	N0	T1c	1009	1	Lymphocyte Depleted (Immune C4)
TCGA-BH-A1FD-11B	68	female	white	M0	N0	T1c	1009	1	#N/A
TCGA-BH-A1FE-01A	31	female	white	M0	N1	T2	2273	1	IFN-gamma Dominant (Immune C2)
TCGA-BH-A1FE-06A	31	female	white	M0	N1	T2	2273	1	#N/A
TCGA-BH-A1FE-11B	31	female	white	M0	N1	T2	2273	1	#N/A
TCGA-BH-A1FG-01A	88	female	white	M0	NX	T1c	577	1	IFN-gamma Dominant (Immune C2)
TCGA-BH-A1FG-11B	88	female	white	M0	NX	T1c	577	1	#N/A
TCGA-BH-A1FH-01A	47	female	white	M1	N1b	T2	1034	1	Wound Healing (Immune C1)
TCGA-BH-A1FH-11B	47	female	white	M1	N1b	T2	1034	1	#N/A
TCGA-BH-A1FJ-01A	66	female	white	M0	N1b	T3	1927	1	IFN-gamma Dominant (Immune C2)
TCGA-BH-A1FJ-11B	66	female	white	M0	N1b	T3	1927	1	#N/A
TCGA-BH-A1FL-01A	69	female	white	M0	N1b	T2	1673	1	Inflammatory (Immune C3)
TCGA-BH-A1FL-11A	69	female	white	M0	N1b	T2	1673	1	#N/A
TCGA-BH-A1FM-01A	44	female	white	M0	N2	T2	1388	1	Lymphocyte Depleted (Immune C4)
TCGA-BH-A1FM-11B	44	female	white	M0	N2	T2	1388	1	#N/A
TCGA-BH-A1FN-01A	34	female	white	M0	N0	T2	2192	1	IFN-gamma Dominant (Immune C2)
TCGA-BH-A1FN-11A	34	female	white	M0	N0	T2	2192	1	#N/A
TCGA-BH-A1FR-01A	73	female	white	M0	N1a	T4b	1642	1	Inflammatory (Immune C3)
TCGA-BH-A1FR-11B	73	female	white	M0	N1a	T4b	1642	1	#N/A
TCGA-BH-A1FU-01A	44	female	white	M0	N0	T1c	1688	1	Wound Healing (Immune C1)
TCGA-BH-A1FU-11A	44	female	white	M0	N0	T1c	1688	1	#N/A
TCGA-BH-A201-01A	64	female	white	M0	N0	T1	856	0	Wound Healing (Immune C1)
TCGA-BH-A202-01A	60	female	white	M0	N0	T2	795	0	Wound Healing (Immune C1)
TCGA-BH-A203-01A	78	female	white	M0	N1b	T2	1174	1	Wound Healing (Immune C1)
TCGA-BH-A203-11A	78	female	white	M0	N1b	T2	1174	1	#N/A
TCGA-BH-A204-01A	80	female	white	M0	N1b	T2	2534	1	Lymphocyte Depleted (Immune C4)
TCGA-BH-A204-11A	80	female	white	M0	N1b	T2	2534	1	#N/A
TCGA-BH-A208-01A	48	female	white	M0	N1b	T2	1759	1	Wound Healing (Immune C1)
TCGA-BH-A208-11A	48	female	white	M0	N1b	T2	1759	1	#N/A
TCGA-BH-A209-01A	77	female	black or african american	M0	N0	T1c	3959	1	IFN-gamma Dominant (Immune C2)
TCGA-BH-A209-11A	77	female	black or african american	M0	N0	T1c	3959	1	#N/A
TCGA-BH-A28O-01A	50	female	white	M0	N3	T3a	1120	0	Inflammatory (Immune C3)
TCGA-BH-A28Q-01A	46	female	white	M0	N1a	T2	1119	0	Inflammatory (Immune C3)
TCGA-BH-A2L8-01A	45	female	white	M0	N0 (i-)	T2	612	0	IFN-gamma Dominant (Immune C2)
TCGA-BH-A42T-01A	75	female	black or african american	M0	N0 (i+)	T2	320	1	Wound Healing (Immune C1)
TCGA-BH-A42U-01A	80	female	black or african american	M0	N0	T2	3364	0	Inflammatory (Immune C3)
TCGA-BH-A42V-01A	41	female	black or african american	M0	N1mi	T1c	635	0	Inflammatory (Immune C3)
TCGA-BH-A5IZ-01A	51	female	black or african american	cM0 (i+)	N1a	T2	567	0	Wound Healing (Immune C1)
TCGA-BH-A5IZ-11A	51	female	black or african american	cM0 (i+)	N1a	T2	567	0	#N/A
TCGA-BH-A5J0-01A	63	female	black or african american	M0	N0	T1c	715	0	IFN-gamma Dominant (Immune C2)
TCGA-BH-A6R8-01A	46	female	black or african american	M0	N0	T2	293	0	IFN-gamma Dominant (Immune C2)
TCGA-BH-A6R9-01A	61	female	white	M0	N0	T2	160	0	Wound Healing (Immune C1)
TCGA-BH-A8FY-01A	87	female	white	M0	N0 (i+)	T1c	295	1	Lymphocyte Depleted (Immune C4)
TCGA-BH-A8FZ-01A	58	female	white	M0	N0	T1b	574	0	IFN-gamma Dominant (Immune C2)
TCGA-BH-A8G0-01A	54	female	white	M0	N1a	T2	662	0	Inflammatory (Immune C3)
TCGA-BH-AB28-01A	53	female	white	M0	N1a	T3	287	0	Inflammatory (Immune C3)
TCGA-BH-AB28-11A	53	female	white	M0	N1a	T3	287	0	#N/A
TCGA-C8-A12K-01A	80	female	asian	M0	N1	T2	1329	0	IFN-gamma Dominant (Immune C2)
TCGA-C8-A12L-01A	67	female	asian	M0	N0 (i-)	T2	363	0	Wound Healing (Immune C1)
TCGA-C8-A12M-01A	70	female	asian	M0	N0 (i-)	T2	358	0	Inflammatory (Immune C3)
TCGA-C8-A12N-01A	58	female	asian	M0	N0 (i-)	T2	358	0	IFN-gamma Dominant (Immune C2)
TCGA-C8-A12O-01A	50	female	asian	M0	N0 (i-)	T2	385	0	Wound Healing (Immune C1)
TCGA-C8-A12P-01A	55	female	asian	M0	N1	T2	358	0	IFN-gamma Dominant (Immune C2)
TCGA-C8-A12Q-01A	78	female	asian	M0	N2	T1	385	1	Wound Healing (Immune C1)
TCGA-C8-A12T-01A	43	female	asian	M0	N0	T2	1201	0	Wound Healing (Immune C1)
TCGA-C8-A12U-01A	46	female	asian	M0	N1	T2	385	0	IFN-gamma Dominant (Immune C2)
TCGA-C8-A12V-01A	55	female	asian	M0	N0	T2	385	0	IFN-gamma Dominant (Immune C2)
TCGA-C8-A12W-01A	49	female	asian	M0	N1	T4	385	0	Wound Healing (Immune C1)
TCGA-C8-A12X-01A	62	female	asian	M0	N1	T2	385	0	IFN-gamma Dominant (Immune C2)
TCGA-C8-A12Y-01A	44	female	asian	M0	N1	T2	1476	0	IFN-gamma Dominant (Immune C2)
TCGA-C8-A12Z-01A	45	female	asian	M0	N1	T2	382	0	Wound Healing (Immune C1)
TCGA-C8-A130-01A	52	female	asian	M0	N2	T3	370	0	IFN-gamma Dominant (Immune C2)
TCGA-C8-A131-01A	82	female	asian	M0	N2	T2	411	0	Wound Healing (Immune C1)
TCGA-C8-A132-01A	56	female	asian	M0	N1	T2	383	0	Wound Healing (Immune C1)
TCGA-C8-A133-01A	65	female	white	M0	N1	T3	1329	0	Lymphocyte Depleted (Immune C4)
TCGA-C8-A134-01A	52	female	asian	M0	N0	T2	383	0	IFN-gamma Dominant (Immune C2)
TCGA-C8-A135-01A	64	female	asian	M0	N1	T2	393	0	Wound Healing (Immune C1)
TCGA-C8-A137-01A	34	female	asian	M0	N1	T2	379	0	Wound Healing (Immune C1)
TCGA-C8-A138-01A	54	female	asian	M0	N2	T2	380	0	IFN-gamma Dominant (Immune C2)
TCGA-C8-A1HE-01A	59	female	asian	M0	N0	T2	375	0	TGF-beta Dominant (Immune C6)
TCGA-C8-A1HF-01A	48	female	asian	M0	N0	T2	332	0	IFN-gamma Dominant (Immune C2)
TCGA-C8-A1HG-01A	50	female	asian	M0	N0	T2	345	0	IFN-gamma Dominant (Immune C2)
TCGA-C8-A1HI-01A	40	female	asian	M0	N2	T2	343	0	IFN-gamma Dominant (Immune C2)
TCGA-C8-A1HJ-01A	53	female	asian	M0	N0	T2	5	0	IFN-gamma Dominant (Immune C2)
TCGA-C8-A1HK-01A	53	female	asian	M0	N1	T2	366	0	IFN-gamma Dominant (Immune C2)
TCGA-C8-A1HL-01A	38	female	asian	M0	N1	T3	317	0	Wound Healing (Immune C1)
TCGA-C8-A1HM-01A	74	female	asian	M0	N0	T2	375	0	IFN-gamma Dominant (Immune C2)
TCGA-C8-A1HN-01A	56	female	asian	M0	N0	T2	394	0	Lymphocyte Depleted (Immune C4)
TCGA-C8-A1HO-01A	34	female	asian	M0	N3	T3	375	0	IFN-gamma Dominant (Immune C2)
TCGA-C8-A26V-01A	47	female	asian	M0	N2	T3	616	0	IFN-gamma Dominant (Immune C2)
TCGA-C8-A26W-01A	58	female	asian	M0	N1	T2	381	0	IFN-gamma Dominant (Immune C2)
TCGA-C8-A26X-01A	58	female	asian	M0	N1	T1	376	0	IFN-gamma Dominant (Immune C2)
TCGA-C8-A26Y-01A	90	female	asian	M0	N0	T2	1329	0	Wound Healing (Immune C1)
TCGA-C8-A26Z-01A	59	female	asian	M0	N0	T2	470	0	Wound Healing (Immune C1)
TCGA-C8-A273-01A	29	female	asian	M0	N1	T2	513	0	IFN-gamma Dominant (Immune C2)
TCGA-C8-A274-01A	63	female	asian	M0	N0	T2	508	0	Lymphocyte Depleted (Immune C4)
TCGA-C8-A275-01A	56	female	asian	M0	N1	T1	1	0	IFN-gamma Dominant (Immune C2)
TCGA-C8-A278-01A	61	female	asian	M0	N2	T2	297	0	IFN-gamma Dominant (Immune C2)
TCGA-C8-A27A-01A	48	female	asian	M0	N1	T2	747	0	IFN-gamma Dominant (Immune C2)
TCGA-C8-A27B-01A	48	female	asian	M0	N0	T3	439	0	IFN-gamma Dominant (Immune C2)
TCGA-C8-A3M7-01A	60	female	asian	M0	N0	T4b	1034	1	Inflammatory (Immune C3)
TCGA-C8-A3M8-01A	68	female	asian	M0	N0	T1c	394	0	Wound Healing (Immune C1)
TCGA-C8-A8HP-01A	59	female	asian	M0	N2	T2	396	0	Wound Healing (Immune C1)
TCGA-C8-A8HQ-01A	53	female	asian	M0	N1	T2	380	0	Wound Healing (Immune C1)
TCGA-C8-A8HR-01A	49	female	asian	M0	N2	T3	408	0	IFN-gamma Dominant (Immune C2)
TCGA-D8-A13Y-01A	52	female	white	M0	N0	T1c	1728	0	Lymphocyte Depleted (Immune C4)
TCGA-D8-A13Z-01A	51	female	white	M0	N2a	T2	635	0	IFN-gamma Dominant (Immune C2)
TCGA-D8-A140-01A	62	female	white	M0	N1a	T2	403	0	IFN-gamma Dominant (Immune C2)
TCGA-D8-A141-01A	40	female	white	M0	N1	T1c	626	0	TGF-beta Dominant (Immune C6)
TCGA-D8-A142-01A	74	female	white	M0	N0	T3	425	0	Wound Healing (Immune C1)
TCGA-D8-A143-01A	51	female	white	M0	N0	T2	431	0	Wound Healing (Immune C1)
TCGA-D8-A145-01A	80	female	white	M0	N1a	T1c	410	0	Inflammatory (Immune C3)
TCGA-D8-A146-01A	57	female	white	MX	N0	T2	643	0	#N/A
TCGA-D8-A147-01A	45	female	white	M0	N0	T2	584	0	IFN-gamma Dominant (Immune C2)
TCGA-D8-A1J8-01A	77	female	white	M0	N1a	T2	431	0	IFN-gamma Dominant (Immune C2)
TCGA-D8-A1J9-01A	48	female	white	M0	N0	T1c	532	0	Lymphocyte Depleted (Immune C4)
TCGA-D8-A1JA-01A	60	female	white	M0	NX	T4b	502	0	Lymphocyte Depleted (Immune C4)
TCGA-D8-A1JB-01A	54	female	white	M0	N1a	T2	1688	0	IFN-gamma Dominant (Immune C2)
TCGA-D8-A1JC-01A	59	female	white	M0	N2a	T2	480	0	IFN-gamma Dominant (Immune C2)
TCGA-D8-A1JD-01A	41	female	white	M0	N1a	T2	552	0	Wound Healing (Immune C1)
TCGA-D8-A1JE-01A	62	female	white	M0	N1a	T1c	575	0	Lymphocyte Depleted (Immune C4)
TCGA-D8-A1JF-01A	79	female	white	M0	N2a	T1c	366	0	Inflammatory (Immune C3)
TCGA-D8-A1JH-01A	56	female	white	M0	N0	T1c	426	0	Inflammatory (Immune C3)
TCGA-D8-A1JI-01A	54	female	white	MX	N1a	T1c	577	0	Inflammatory (Immune C3)
TCGA-D8-A1JJ-01A	54	female	white	M0	N0	T2	611	0	Wound Healing (Immune C1)
TCGA-D8-A1JK-01A	90	female	white	M0	N0	T2	1201	0	IFN-gamma Dominant (Immune C2)
TCGA-D8-A1JL-01A	72	female	white	M0	N0	T2	611	0	IFN-gamma Dominant (Immune C2)
TCGA-D8-A1JM-01A	59	female	white	M0	N1a	T2	590	0	Wound Healing (Immune C1)
TCGA-D8-A1JN-01A	80	female	white	MX	N3a	T3	620	0	Inflammatory (Immune C3)
TCGA-D8-A1JP-01A	73	female	white	M0	N0	T1c	639	0	Wound Healing (Immune C1)
TCGA-D8-A1JS-01A	77	female	white	M0	N0	T1c	371	0	Lymphocyte Depleted (Immune C4)
TCGA-D8-A1JT-01A	70	female	white	M0	N0	T2	405	0	Lymphocyte Depleted (Immune C4)
TCGA-D8-A1JU-01A	51	female	white	M0	N0	T1c	447	0	Inflammatory (Immune C3)
TCGA-D8-A1X5-01A	81	female	white	MX	N3a	T2	565	0	Inflammatory (Immune C3)
TCGA-D8-A1X6-01A	80	female	white	MX	N2a	T3	541	0	Lymphocyte Depleted (Immune C4)
TCGA-D8-A1X7-01A	40	female	white	MX	N0	T2	509	0	Wound Healing (Immune C1)
TCGA-D8-A1X8-01A	62	female	white	M0	N2a	T1c	783	0	Inflammatory (Immune C3)
TCGA-D8-A1X9-01A	66	female	white	M0	N1a	T2	727	0	IFN-gamma Dominant (Immune C2)
TCGA-D8-A1XA-01A	64	female	white	M0	N0	T1c	839	0	IFN-gamma Dominant (Immune C2)
TCGA-D8-A1XB-01A	62	female	white	M0	N1a	T2	552	0	Wound Healing (Immune C1)
TCGA-D8-A1XC-01A	85	female	white	M0	N1a	T4b	377	1	Inflammatory (Immune C3)
TCGA-D8-A1XD-01A	36	female	white	M0	N2a	T1c	522	0	Wound Healing (Immune C1)
TCGA-D8-A1XF-01A	45	female	white	M0	N0	T2	463	0	TGF-beta Dominant (Immune C6)
TCGA-D8-A1XG-01A	86	female	white	M0	N1a	T4b	448	0	Lymphocyte Depleted (Immune C4)
TCGA-D8-A1XJ-01A	76	female	white	MX	N1a	T3	664	0	Wound Healing (Immune C1)
TCGA-D8-A1XK-01A	55	female	white	MX	N1a	T2	441	0	IFN-gamma Dominant (Immune C2)
TCGA-D8-A1XL-01A	34	female	white	MX	N1a	T2	606	0	IFN-gamma Dominant (Immune C2)
TCGA-D8-A1XM-01A	57	female	white	M0	N0	T1c	538	0	IFN-gamma Dominant (Immune C2)
TCGA-D8-A1XO-01A	56	female	white	M0	N1a	T2	1682	0	Inflammatory (Immune C3)
TCGA-D8-A1XQ-01A	69	female	white	M0	N0	T2	499	0	IFN-gamma Dominant (Immune C2)
TCGA-D8-A1XR-01A	56	female	white	M0	N1a	T2	482	0	Inflammatory (Immune C3)
TCGA-D8-A1XS-01A	48	male	white	M0	N3a	T2	496	0	Wound Healing (Immune C1)
TCGA-D8-A1XT-01A	61	female	white	M0	N1a	T1c	506	0	IFN-gamma Dominant (Immune C2)
TCGA-D8-A1XU-01A	56	female	white	M0	N0	T1c	395	0	TGF-beta Dominant (Immune C6)
TCGA-D8-A1XV-01A	84	female	white	M0	N0	T2	461	0	Lymphocyte Depleted (Immune C4)
TCGA-D8-A1XW-01A	53	female	white	M0	N0	T2	1309	0	Inflammatory (Immune C3)
TCGA-D8-A1XY-01A	74	female	white	MX	N0	T2	503	0	IFN-gamma Dominant (Immune C2)
TCGA-D8-A1XZ-01A	81	female	white	MX	N2a	T1c	466	0	IFN-gamma Dominant (Immune C2)
TCGA-D8-A1Y0-01A	65	female	white	MX	N2a	T1c	472	0	IFN-gamma Dominant (Immune C2)
TCGA-D8-A1Y1-01A	80	female	white	MX	N1a	T3	302	1	Lymphocyte Depleted (Immune C4)
TCGA-D8-A1Y2-01A	71	female	white	MX	N0	T2	433	0	IFN-gamma Dominant (Immune C2)
TCGA-D8-A1Y3-01A	61	female	white	MX	N2a	T2	430	0	IFN-gamma Dominant (Immune C2)
TCGA-D8-A27E-01A	66	female	white	M0	N0	T1c	530	0	Inflammatory (Immune C3)
TCGA-D8-A27F-01A	40	female	white	M0	N0	T2	488	0	Wound Healing (Immune C1)
TCGA-D8-A27G-01A	75	female	white	M0	N0	T2	409	0	Wound Healing (Immune C1)
TCGA-D8-A27H-01A	72	female	white	M0	N0	T2	397	0	Wound Healing (Immune C1)
TCGA-D8-A27I-01A	58	female	white	M0	N2a	T1c	439	0	Inflammatory (Immune C3)
TCGA-D8-A27K-01A	47	female	white	M0	N1a	T2	1461	0	Inflammatory (Immune C3)
TCGA-D8-A27L-01A	49	female	white	M0	N2a	T1c	499	0	Inflammatory (Immune C3)
TCGA-D8-A27M-01A	59	female	white	M0	N0	T1c	410	0	IFN-gamma Dominant (Immune C2)
TCGA-D8-A27N-01A	36	female	white	M0	N2a	T2	519	0	IFN-gamma Dominant (Immune C2)
TCGA-D8-A27P-01A	64	female	white	M0	N0	T1c	49	0	Inflammatory (Immune C3)
TCGA-D8-A27R-01A	41	female	white	M0	N3a	T2	307	0	Wound Healing (Immune C1)
TCGA-D8-A27T-01A	53	female	white	M0	N3a	T2	398	0	IFN-gamma Dominant (Immune C2)
TCGA-D8-A27V-01A	62	female	white	M0	N0	T2	381	0	Inflammatory (Immune C3)
TCGA-D8-A27W-01A	55	female	white	M0	N0	T4b	373	0	IFN-gamma Dominant (Immune C2)
TCGA-D8-A3Z5-01A	54	female	white	M0	N3a	T2	1015	0	Inflammatory (Immune C3)
TCGA-D8-A3Z6-01A	56	female	white	M0	N3a	T3	563	0	Wound Healing (Immune C1)
TCGA-D8-A4Z1-01A	68	female	white	M0	N0	T1c	659	0	Inflammatory (Immune C3)
TCGA-D8-A73U-01A	88	female	white	M0	N0	T2	492	0	Inflammatory (Immune C3)
TCGA-D8-A73W-01A	79	female	white	MX	N1a	T3	385	1	IFN-gamma Dominant (Immune C2)
TCGA-D8-A73X-01A	53	female	white	M0	N0	T2	767	0	Inflammatory (Immune C3)
TCGA-E2-A105-01A	79	female	white	M0	N0 (i-)	T2	1308	0	Wound Healing (Immune C1)
TCGA-E2-A106-01A	34	female	asian	M0	N1mi	T1c	2541	0	Inflammatory (Immune C3)
TCGA-E2-A107-01A	54	female	white	M0	N2a	T3	1047	0	Wound Healing (Immune C1)
TCGA-E2-A108-01A	64	female	white	M0	N2a	T2	837	0	Inflammatory (Immune C3)
TCGA-E2-A109-01A	64	female	white	M0	N0 (i-)	T2	1417	0	IFN-gamma Dominant (Immune C2)
TCGA-E2-A10A-01A	41	female	white	M0	N0 (i-)	T3	1229	0	Lymphocyte Depleted (Immune C4)
TCGA-E2-A10B-01A	67	female	white	M0	N1a	T2	1141	0	IFN-gamma Dominant (Immune C2)
TCGA-E2-A10C-01A	54	female	white	M0	N1a	T2	1220	0	IFN-gamma Dominant (Immune C2)
TCGA-E2-A10E-01A	64	female	white	M0	N1a	T1c	865	0	IFN-gamma Dominant (Immune C2)
TCGA-E2-A10F-01A	47	female	white	M0	N0 (i-)	T2	878	0	Wound Healing (Immune C1)
TCGA-E2-A14N-01A	37	female	white	M0	N1	T2	1434	0	IFN-gamma Dominant (Immune C2)
TCGA-E2-A14O-01A	76	female	white	M0	N1a	T3	1359	0	Wound Healing (Immune C1)
TCGA-E2-A14P-01A	79	female	white	M0	N3	T2	1246	0	Wound Healing (Immune C1)
TCGA-E2-A14Q-01A	50	female	white	M0	N1mi	T2	1163	0	Wound Healing (Immune C1)
TCGA-E2-A14R-01A	62	female	white	M0	N0	T2	1174	0	IFN-gamma Dominant (Immune C2)
TCGA-E2-A14T-01A	52	female	white	M0	N0	T2	2311	0	Inflammatory (Immune C3)
TCGA-E2-A14U-01A	74	female	white	M0	N0	T1c	1318	0	Inflammatory (Immune C3)
TCGA-E2-A14V-01A	53	female	white	M0	N1	T2	1042	0	Wound Healing (Immune C1)
TCGA-E2-A14W-01A	78	male	white	M0	N0	T2	974	0	Wound Healing (Immune C1)
TCGA-E2-A14X-01A	55	female	black or african american	M0	N2	T2	972	0	Wound Healing (Immune C1)
TCGA-E2-A14Y-01A	35	female	white	M0	N0	T2	2109	0	IFN-gamma Dominant (Immune C2)
TCGA-E2-A14Y-11A	35	female	white	M0	N0	T2	2109	0	#N/A
TCGA-E2-A14Z-01A	64	female	white	M0	N0	T1c	563	1	IFN-gamma Dominant (Immune C2)
TCGA-E2-A150-01A	48	female	white	M0	N0	T2	1935	0	IFN-gamma Dominant (Immune C2)
TCGA-E2-A152-01A	56	female	white	M0	N0	T1c	2128	0	Wound Healing (Immune C1)
TCGA-E2-A153-01A	51	female	white	M0	N1a	T2	707	0	TGF-beta Dominant (Immune C6)
TCGA-E2-A153-11A	51	female	white	M0	N1a	T2	707	0	#N/A
TCGA-E2-A154-01A	68	female	white	M0	N0	T1c	591	0	Wound Healing (Immune C1)
TCGA-E2-A155-01A	58	female	white	M0	N1a	T2	640	0	Wound Healing (Immune C1)
TCGA-E2-A156-01A	61	female	white	M0	N0	T1c	726	0	Inflammatory (Immune C3)
TCGA-E2-A158-01A	43	female	white	M0	N1mi	T1c	450	0	Wound Healing (Immune C1)
TCGA-E2-A158-11A	43	female	white	M0	N1mi	T1c	450	0	#N/A
TCGA-E2-A159-01A	50	female	white	M0	N0	T2	762	0	IFN-gamma Dominant (Immune C2)
TCGA-E2-A15A-01A	45	female	white	M0	N3a	T2	710	0	IFN-gamma Dominant (Immune C2)
TCGA-E2-A15A-06A	45	female	white	M0	N3a	T2	710	0	#N/A
TCGA-E2-A15C-01A	61	female	white	M0	N0	T1c	694	0	Inflammatory (Immune C3)
TCGA-E2-A15D-01A	47	female	white	M0	N0	T2	526	0	Inflammatory (Immune C3)
TCGA-E2-A15E-01A	40	female	white	M0	N1a	T1c	630	0	Wound Healing (Immune C1)
TCGA-E2-A15E-06A	40	female	white	M0	N1a	T1c	630	0	#N/A
TCGA-E2-A15F-01A	64	female	white	M0	N0	T1c	658	0	IFN-gamma Dominant (Immune C2)
TCGA-E2-A15G-01A	76	female	white	M0	N0	T2	554	0	Inflammatory (Immune C3)
TCGA-E2-A15H-01A	38	female	white	M0	N1mi	T1c	393	0	Wound Healing (Immune C1)
TCGA-E2-A15I-01A	44	female	white	M0	N0	T2	1692	0	Inflammatory (Immune C3)
TCGA-E2-A15I-11A	44	female	white	M0	N0	T2	1692	0	#N/A
TCGA-E2-A15J-01A	51	female	white	M0	N0	T1c	1640	0	Lymphocyte Depleted (Immune C4)
TCGA-E2-A15K-01A	58	female	white	M0	N1a	T2	275	0	Wound Healing (Immune C1)
TCGA-E2-A15K-06A	58	female	white	M0	N1a	T2	275	0	#N/A
TCGA-E2-A15K-11A	58	female	white	M0	N1a	T2	275	0	#N/A
TCGA-E2-A15L-01A	65	female	black or african american	M0	N0	T2	626	0	Wound Healing (Immune C1)
TCGA-E2-A15L-11A	65	female	black or african american	M0	N0	T2	626	0	#N/A
TCGA-E2-A15M-01A	66	female	white	M0	N0	T2	336	1	IFN-gamma Dominant (Immune C2)
TCGA-E2-A15M-11A	66	female	white	M0	N0	T2	336	1	#N/A
TCGA-E2-A15O-01A	89	female	black or african american	M0	NX	T1c	289	0	Wound Healing (Immune C1)
TCGA-E2-A15P-01A	61	female	white	M0	N0	T1c	595	0	IFN-gamma Dominant (Immune C2)
TCGA-E2-A15R-01A	64	female	white	M0	N1a	T1c	1732	0	Inflammatory (Immune C3)
TCGA-E2-A15S-01A	34	female	white	M0	N1	T2	428	0	Wound Healing (Immune C1)
TCGA-E2-A15T-01A	65	female	white	M0	N0	T2	1563	0	Inflammatory (Immune C3)
TCGA-E2-A1AZ-01A	63	female	white	M0	N1a	T2	2329	0	IFN-gamma Dominant (Immune C2)
TCGA-E2-A1B0-01A	50	female	white	M0	N2	T2	1631	0	Wound Healing (Immune C1)
TCGA-E2-A1B1-01A	45	female	white	M0	N1	T2	2653	0	IFN-gamma Dominant (Immune C2)
TCGA-E2-A1B4-01A	74	female	white	M0	N2a	T1c	1004	1	Inflammatory (Immune C3)
TCGA-E2-A1B5-01A	46	female	white	M0	N0	T2	984	0	IFN-gamma Dominant (Immune C2)
TCGA-E2-A1B5-11A	46	female	white	M0	N0	T2	984	0	#N/A
TCGA-E2-A1B6-01A	44	female	white	M0	N0	T2	867	0	IFN-gamma Dominant (Immune C2)
TCGA-E2-A1BC-01A	63	female	not reported	M0	N0	T1c	501	0	Inflammatory (Immune C3)
TCGA-E2-A1BC-11A	63	female	not reported	M0	N0	T1c	501	0	#N/A
TCGA-E2-A1BD-01A	53	female	white	M0	N0	T2	1133	0	Wound Healing (Immune C1)
TCGA-E2-A1IE-01A	61	female	white	M0	N1	T2	2362	0	Wound Healing (Immune C1)
TCGA-E2-A1IF-01A	74	female	white	M0	N0	T1c	1138	0	Wound Healing (Immune C1)
TCGA-E2-A1IF-11A	74	female	white	M0	N0	T1c	1138	0	#N/A
TCGA-E2-A1IG-01A	45	female	white	M0	N1mi	T2	2140	0	Wound Healing (Immune C1)
TCGA-E2-A1IG-11A	45	female	white	M0	N1mi	T2	2140	0	#N/A
TCGA-E2-A1IH-01A	80	female	white	M0	N0	T1c	1026	0	Wound Healing (Immune C1)
TCGA-E2-A1II-01A	51	female	white	M0	N0	T1c	1025	0	IFN-gamma Dominant (Immune C2)
TCGA-E2-A1II-11A	51	female	white	M0	N0	T1c	1025	0	#N/A
TCGA-E2-A1IJ-01A	57	female	white	M0	N0	T1c	865	0	Inflammatory (Immune C3)
TCGA-E2-A1IK-01A	71	female	white	M0	N1mi	T1c	1800	0	IFN-gamma Dominant (Immune C2)
TCGA-E2-A1IL-01A	78	female	white	M0	N1a	T1c	118	0	IFN-gamma Dominant (Immune C2)
TCGA-E2-A1IN-01A	60	female	white	M0	N0	T1c	675	0	Wound Healing (Immune C1)
TCGA-E2-A1IO-01A	37	female	white	M0	N0	T1c	1855	0	Inflammatory (Immune C3)
TCGA-E2-A1IO-11A	37	female	white	M0	N0	T1c	1855	0	#N/A
TCGA-E2-A1IU-01A	60	female	white	M0	N0 (mol+)	T1c	337	0	Inflammatory (Immune C3)
TCGA-E2-A1IU-11A	60	female	white	M0	N0 (mol+)	T1c	337	0	#N/A
TCGA-E2-A1L6-01A	44	female	white	M0	N1mi	T1c	1648	0	Wound Healing (Immune C1)
TCGA-E2-A1L7-01A	40	female	white	M0	N2	T2	1836	0	IFN-gamma Dominant (Immune C2)
TCGA-E2-A1L7-11A	40	female	white	M0	N2	T2	1836	0	#N/A
TCGA-E2-A1L8-01A	52	female	black or african american	M0	N1a	T2	2240	0	Wound Healing (Immune C1)
TCGA-E2-A1L9-01A	40	female	white	M0	N1mi	T1c	598	0	IFN-gamma Dominant (Immune C2)
TCGA-E2-A1LA-01A	59	female	not reported	M0	N1a	T1c	748	0	IFN-gamma Dominant (Immune C2)
TCGA-E2-A1LB-01A	41	female	black or african american	M0	N1	T2	2306	0	Wound Healing (Immune C1)
TCGA-E2-A1LB-11A	41	female	black or african american	M0	N1	T2	2306	0	#N/A
TCGA-E2-A1LE-01A	71	female	white	M0	N3a	T2	879	1	Wound Healing (Immune C1)
TCGA-E2-A1LE-11A	71	female	white	M0	N3a	T2	879	1	#N/A
TCGA-E2-A1LG-01A	50	female	black or african american	M0	N0	T2	1523	0	IFN-gamma Dominant (Immune C2)
TCGA-E2-A1LG-11A	50	female	black or african american	M0	N0	T2	1523	0	#N/A
TCGA-E2-A1LH-01A	59	female	white	M0	N0	T1c	3247	0	IFN-gamma Dominant (Immune C2)
TCGA-E2-A1LH-11A	59	female	white	M0	N0	T1c	3247	0	#N/A
TCGA-E2-A1LI-01A	57	female	white	M0	N1	T2	3121	0	IFN-gamma Dominant (Immune C2)
TCGA-E2-A1LI-11A	57	female	white	M0	N1	T2	3121	0	#N/A
TCGA-E2-A1LK-01A	84	female	black or african american	M0	N3a	T4b	266	1	IFN-gamma Dominant (Immune C2)
TCGA-E2-A1LK-11A	84	female	black or african american	M0	N3a	T4b	266	1	#N/A
TCGA-E2-A1LL-01A	73	female	black or african american	MX	N2a	T3	1309	0	Wound Healing (Immune C1)
TCGA-E2-A1LL-11A	73	female	black or african american	MX	N2a	T3	1309	0	#N/A
TCGA-E2-A1LS-01A	46	female	white	M0	N0	T1c	1604	0	Inflammatory (Immune C3)
TCGA-E2-A1LS-11A	46	female	white	M0	N0	T1c	1604	0	#N/A
TCGA-E2-A2P5-01A	78	female	black or african american	M0	N3	T2	821	1	Wound Healing (Immune C1)
TCGA-E2-A2P6-01A	77	female	not reported	M0	N1	T2	1051	0	Inflammatory (Immune C3)
TCGA-E2-A3DX-01A	43	female	white	M0	N3	T2	1325	0	Inflammatory (Immune C3)
TCGA-E2-A56Z-01A	69	female	black or african american	M0	N1a	T2	252	0	IFN-gamma Dominant (Immune C2)
TCGA-E2-A570-01A	47	female	black or african american	M0	N1mi	T1c	931	0	Wound Healing (Immune C1)
TCGA-E2-A572-01A	72	female	black or african american	M0	N2	T2	1208	0	Lymphocyte Depleted (Immune C4)
TCGA-E2-A573-01A	48	female	black or african american	M0	N0	T1c	1062	0	IFN-gamma Dominant (Immune C2)
TCGA-E2-A574-01A	44	female	black or african american	M0	N0	T2	1179	0	Wound Healing (Immune C1)
TCGA-E2-A576-01A	69	female	black or african american	MX	N0	T1c	1043	0	Wound Healing (Immune C1)
TCGA-E2-A9RU-01A	90	female	black or african american	MX	N3a	T2	1201	0	IFN-gamma Dominant (Immune C2)
TCGA-E9-A1N3-01A	70	female	white	M0	N2	T1c	1059	0	Lymphocyte Depleted (Immune C4)
TCGA-E9-A1N4-01A	41	female	white	M0	N2	T2	1000	0	TGF-beta Dominant (Immune C6)
TCGA-E9-A1N4-11A	41	female	white	M0	N2	T2	1000	0	#N/A
TCGA-E9-A1N5-01A	45	female	white	M0	N1	T2	1120	0	Wound Healing (Immune C1)
TCGA-E9-A1N5-11A	45	female	white	M0	N1	T2	1120	0	#N/A
TCGA-E9-A1N6-01A	52	female	white	M0	N1	T2	678	1	Lymphocyte Depleted (Immune C4)
TCGA-E9-A1N6-11A	52	female	white	M0	N1	T2	678	1	#N/A
TCGA-E9-A1N8-01A	48	female	white	M0	N0	T2	1039	0	Wound Healing (Immune C1)
TCGA-E9-A1N8-11A	48	female	white	M0	N0	T2	1039	0	#N/A
TCGA-E9-A1N9-01A	58	female	white	M0	N0	T2	1101	0	Wound Healing (Immune C1)
TCGA-E9-A1N9-11A	58	female	white	M0	N0	T2	1101	0	#N/A
TCGA-E9-A1NA-01A	58	female	white	M0	N0	T2	1112	0	Lymphocyte Depleted (Immune C4)
TCGA-E9-A1NA-11A	58	female	white	M0	N0	T2	1112	0	#N/A
TCGA-E9-A1NC-01A	61	female	white	M0	N1	T2	1203	0	IFN-gamma Dominant (Immune C2)
TCGA-E9-A1ND-01A	75	female	white	M0	N1	T2	1266	0	IFN-gamma Dominant (Immune C2)
TCGA-E9-A1ND-11A	75	female	white	M0	N1	T2	1266	0	#N/A
TCGA-E9-A1NE-01A	28	female	white	M0	N1	T2	1088	0	IFN-gamma Dominant (Immune C2)
TCGA-E9-A1NE-11A	28	female	white	M0	N1	T2	1088	0	#N/A
TCGA-E9-A1NF-01A	60	female	white	M0	N0	T2	1072	1	Wound Healing (Immune C1)
TCGA-E9-A1NF-11A	60	female	white	M0	N0	T2	1072	1	#N/A
TCGA-E9-A1NG-01A	62	female	white	M0	N0	T2	786	1	TGF-beta Dominant (Immune C6)
TCGA-E9-A1NG-11A	62	female	white	M0	N0	T2	786	1	#N/A
TCGA-E9-A1NH-01A	71	female	white	M0	N1	T2	576	0	Inflammatory (Immune C3)
TCGA-E9-A1NH-11A	71	female	white	M0	N1	T2	576	0	#N/A
TCGA-E9-A1NI-01A	51	female	white	M0	N0	T2	300	0	IFN-gamma Dominant (Immune C2)
TCGA-E9-A1QZ-01A	61	female	white	M0	N0	T2	755	0	IFN-gamma Dominant (Immune C2)
TCGA-E9-A1R0-01A	58	female	white	M0	N1	T1c	860	0	Inflammatory (Immune C3)
TCGA-E9-A1R2-01A	51	female	white	MX	N3	T2	1063	0	IFN-gamma Dominant (Immune C2)
TCGA-E9-A1R3-01A	70	female	white	M0	N3	T2	78	0	TGF-beta Dominant (Immune C6)
TCGA-E9-A1R4-01A	66	female	white	M0	N0	T1c	186	0	IFN-gamma Dominant (Immune C2)
TCGA-E9-A1R5-01A	63	female	white	M0	N0	T1c	92	0	Wound Healing (Immune C1)
TCGA-E9-A1R6-01A	63	female	white	M0	N0	T2	339	0	Wound Healing (Immune C1)
TCGA-E9-A1R7-01A	64	female	white	M0	N0	T2	1467	0	Inflammatory (Immune C3)
TCGA-E9-A1R7-11A	64	female	white	M0	N0	T2	1467	0	#N/A
TCGA-E9-A1RA-01A	48	female	white	M0	N0	T1c	1369	0	Wound Healing (Immune C1)
TCGA-E9-A1RB-01A	40	female	white	M0	N0	T2	976	1	Wound Healing (Immune C1)
TCGA-E9-A1RB-11A	40	female	white	M0	N0	T2	976	1	#N/A
TCGA-E9-A1RC-01A	56	female	white	M0	N3	T4b	1224	0	Wound Healing (Immune C1)
TCGA-E9-A1RC-11A	56	female	white	M0	N3	T4b	1224	0	#N/A
TCGA-E9-A1RD-01A	67	female	white	M0	N0	T2	34	0	Lymphocyte Depleted (Immune C4)
TCGA-E9-A1RD-11A	67	female	white	M0	N0	T2	34	0	#N/A
TCGA-E9-A1RE-01A	74	female	white	M0	N2	T2	1419	0	Wound Healing (Immune C1)
TCGA-E9-A1RF-01A	68	female	white	M0	N2	T2	200	0	IFN-gamma Dominant (Immune C2)
TCGA-E9-A1RF-11A	68	female	white	M0	N2	T2	200	0	#N/A
TCGA-E9-A1RG-01A	62	female	white	M0	N2	T1c	647	0	Wound Healing (Immune C1)
TCGA-E9-A1RH-01A	63	female	white	M0	N0	T2	1417	0	Wound Healing (Immune C1)
TCGA-E9-A1RH-11A	63	female	white	M0	N0	T2	1417	0	#N/A
TCGA-E9-A1RI-01A	43	female	white	M0	N2	T1c	1449	0	Wound Healing (Immune C1)
TCGA-E9-A1RI-11A	43	female	white	M0	N2	T1c	1449	0	#N/A
TCGA-E9-A226-01A	45	female	white	M0	N2	T2	1048	1	IFN-gamma Dominant (Immune C2)
TCGA-E9-A227-01A	42	female	white	M0	N1	T2	975	0	Wound Healing (Immune C1)
TCGA-E9-A228-01A	58	female	white	M0	N1	T2	1285	0	Lymphocyte Depleted (Immune C4)
TCGA-E9-A229-01A	37	female	white	M0	N0	T1c	1148	0	IFN-gamma Dominant (Immune C2)
TCGA-E9-A22A-01A	74	female	white	M0	N0	T2	1189	0	IFN-gamma Dominant (Immune C2)
TCGA-E9-A22B-01A	71	female	white	M0	N0	T1c	1167	0	IFN-gamma Dominant (Immune C2)
TCGA-E9-A22D-01A	38	female	white	M0	N0	T2	1248	0	IFN-gamma Dominant (Immune C2)
TCGA-E9-A22E-01A	56	female	white	M0	N2	T2	1269	0	IFN-gamma Dominant (Immune C2)
TCGA-E9-A22G-01A	47	female	white	M0	N0	T2	1239	0	IFN-gamma Dominant (Immune C2)
TCGA-E9-A22H-01A	42	female	white	M0	N1	T2	1232	0	IFN-gamma Dominant (Immune C2)
TCGA-E9-A243-01A	52	female	white	M0	N0 (i-)	T2	612	0	IFN-gamma Dominant (Immune C2)
TCGA-E9-A244-01A	54	female	white	M0	N0 (i-)	T2	21	0	Wound Healing (Immune C1)
TCGA-E9-A245-01A	47	female	white	M0	N1	T2	26	1	Wound Healing (Immune C1)
TCGA-E9-A247-01A	59	female	white	M0	N0 (i-)	T1c	1186	0	IFN-gamma Dominant (Immune C2)
TCGA-E9-A248-01A	51	female	white	M0	N0 (i-)	T2	59	0	IFN-gamma Dominant (Immune C2)
TCGA-E9-A249-01A	45	female	white	M0	N0 (i-)	T2	217	0	IFN-gamma Dominant (Immune C2)
TCGA-E9-A24A-01A	69	female	white	M0	N1	T1c	747	0	Lymphocyte Depleted (Immune C4)
TCGA-E9-A295-01A	71	female	white	M0	N0 (i-)	T2	375	0	Wound Healing (Immune C1)
TCGA-E9-A2JS-01A	72	female	white	M0	N1	T2	904	1	IFN-gamma Dominant (Immune C2)
TCGA-E9-A2JT-01A	63	female	white	M0	N0 (i-)	T2	288	0	TGF-beta Dominant (Immune C6)
TCGA-E9-A3HO-01A	49	female	white	M0	N0 (i-)	T2	1158	0	IFN-gamma Dominant (Immune C2)
TCGA-E9-A3Q9-01A	78	female	white	M0	N3	T3	1001	0	Inflammatory (Immune C3)
TCGA-E9-A3QA-01A	33	female	white	M0	N0 (i-)	T2	918	0	IFN-gamma Dominant (Immune C2)
TCGA-E9-A3X8-01A	48	female	white	M0	N1	T2	926	0	Wound Healing (Immune C1)
TCGA-E9-A54X-01A	85	female	white	M0	N0 (i-)	T1b	727	0	Lymphocyte Depleted (Immune C4)
TCGA-E9-A54Y-01A	63	female	white	M0	N2	T2	725	0	Wound Healing (Immune C1)
TCGA-E9-A5FK-01A	60	female	white	M0	N3	T2	812	0	IFN-gamma Dominant (Immune C2)
TCGA-E9-A5FL-01A	65	female	white	M0	N0	T3	24	0	IFN-gamma Dominant (Immune C2)
TCGA-E9-A5UO-01A	41	female	white	M0	N0	T2	785	0	Lymphocyte Depleted (Immune C4)
TCGA-E9-A5UP-01A	63	female	white	M0	N0	T2	803	0	Lymphocyte Depleted (Immune C4)
TCGA-E9-A6HE-01A	45	female	white	MX	N3	T3	847	0	IFN-gamma Dominant (Immune C2)
TCGA-EW-A1IW-01A	80	female	white	MX	N1a	T2	371	0	Wound Healing (Immune C1)
TCGA-EW-A1IX-01A	48	female	asian	MX	N1a	T1b	1208	0	Inflammatory (Immune C3)
TCGA-EW-A1IY-01A	38	female	asian	MX	N0	T1c	258	0	IFN-gamma Dominant (Immune C2)
TCGA-EW-A1IZ-01A	53	female	white	MX	N2a	T2	554	0	IFN-gamma Dominant (Immune C2)
TCGA-EW-A1J1-01A	38	female	white	M0	N1a	T2	575	0	IFN-gamma Dominant (Immune C2)
TCGA-EW-A1J2-01A	50	female	black or african american	MX	N1mi	T1c	403	0	Inflammatory (Immune C3)
TCGA-EW-A1J3-01A	61	female	white	M0	N0	T1c	504	0	Wound Healing (Immune C1)
TCGA-EW-A1J5-01A	59	female	white	M0	N0 (i-)	T3	477	0	IFN-gamma Dominant (Immune C2)
TCGA-EW-A1J6-01A	70	female	white	M0	N0 (i-)	T1c	875	0	IFN-gamma Dominant (Immune C2)
TCGA-EW-A1OV-01A	56	female	white	MX	N1mi	T2	789	0	IFN-gamma Dominant (Immune C2)
TCGA-EW-A1OW-01A	58	female	black or african american	MX	N0	T2	694	0	IFN-gamma Dominant (Immune C2)
TCGA-EW-A1OX-01A	43	female	white	MX	N0	T2	911	0	Lymphocyte Depleted (Immune C4)
TCGA-EW-A1OY-01A	63	female	white	MX	N0	T2	908	0	IFN-gamma Dominant (Immune C2)
TCGA-EW-A1OZ-01A	56	female	black or african american	M0	N0 (i-)	T2	1229	0	Wound Healing (Immune C1)
TCGA-EW-A1P0-01A	55	female	white	MX	N1b	T2	1251	0	Lymphocyte Depleted (Immune C4)
TCGA-EW-A1P1-01A	68	female	white	MX	N3b	T2	1210	0	Wound Healing (Immune C1)
TCGA-EW-A1P3-01A	48	female	white	MX	N0	T2	1611	0	Wound Healing (Immune C1)
TCGA-EW-A1P4-01A	43	female	white	M0	N0 (i-)	T2	907	0	Wound Healing (Immune C1)
TCGA-EW-A1P5-01A	77	female	white	M0	N1a	T2	703	0	IFN-gamma Dominant (Immune C2)
TCGA-EW-A1P6-01A	64	female	white	M0	N1a	T2	562	0	Wound Healing (Immune C1)
TCGA-EW-A1P7-01A	59	female	white	M0	N0 (i-)	T2	915	0	Inflammatory (Immune C3)
TCGA-EW-A1P8-01A	58	female	white	M0	N3b	T2	239	1	IFN-gamma Dominant (Immune C2)
TCGA-EW-A1PA-01A	59	female	white	M0	N1a	T2	575	0	Wound Healing (Immune C1)
TCGA-EW-A1PB-01A	70	female	black or african american	MX	N1a	T3	608	0	IFN-gamma Dominant (Immune C2)
TCGA-EW-A1PD-01A	61	male	white	M0	N1a	T1c	424	0	Wound Healing (Immune C1)
TCGA-EW-A1PE-01A	56	female	white	M0	N1a	T1c	320	0	IFN-gamma Dominant (Immune C2)
TCGA-EW-A1PF-01A	50	female	white	M0	N0	T1c	439	0	Wound Healing (Immune C1)
TCGA-EW-A1PG-01A	53	female	white	MX	N1a	T2	1051	0	Wound Healing (Immune C1)
TCGA-EW-A1PH-01A	52	female	white	M0	N1a	T1c	607	0	IFN-gamma Dominant (Immune C2)
TCGA-EW-A2FR-01A	59	female	black or african american	MX	N3a	T1b	1673	0	Wound Healing (Immune C1)
TCGA-EW-A2FS-01A	41	female	black or african american	MX	N1mi	T2	1604	0	IFN-gamma Dominant (Immune C2)
TCGA-EW-A2FV-01A	39	female	white	MX	N3a	T3	788	0	IFN-gamma Dominant (Immune C2)
TCGA-EW-A2FW-01A	52	female	white	MX	N0 (i-)	T2	672	0	Wound Healing (Immune C1)
TCGA-EW-A3U0-01A	61	female	black or african american	M0	N1a	T3	532	0	IFN-gamma Dominant (Immune C2)
TCGA-EW-A423-01A	75	female	white	MX	N0	T2	533	0	Inflammatory (Immune C3)
TCGA-EW-A424-01A	51	female	white	MX	N1	T3	715	0	Wound Healing (Immune C1)
TCGA-EW-A6S9-01A	34	female	black or african american	M0	N1	T1c	463	0	IFN-gamma Dominant (Immune C2)
TCGA-EW-A6SA-01A	59	male	black or african american	MX	N0 (i+)	T2	510	0	Wound Healing (Immune C1)
TCGA-EW-A6SB-01A	62	female	black or african american	M0	N0	T2	760	0	IFN-gamma Dominant (Immune C2)
TCGA-EW-A6SC-01A	60	female	black or african american	M0	N0	T2	952	0	Wound Healing (Immune C1)
TCGA-EW-A6SD-01A	32	female	black or african american	M0	N1a	T2	1010	0	Wound Healing (Immune C1)
TCGA-GI-A2C8-01A	63	female	white	MX	N0	T4b	225	0	Inflammatory (Immune C3)
TCGA-GI-A2C8-11A	63	female	white	MX	N0	T4b	225	0	#N/A
TCGA-GI-A2C9-01A	58	female	black or african american	MX	N0	T3	3342	0	IFN-gamma Dominant (Immune C2)
TCGA-GI-A2C9-11A	58	female	black or african american	MX	N0	T3	3342	0	#N/A
TCGA-GM-A2D9-01A	69	female	white	M0	N0 (i-)	T1c	1812	1	Wound Healing (Immune C1)
TCGA-GM-A2D9-11A	69	female	white	M0	N0 (i-)	T1c	1812	1	#N/A
TCGA-GM-A2DA-01A	46	female	white	M0	N1b	T2	6593	1	Wound Healing (Immune C1)
TCGA-GM-A2DB-01A	62	female	white	M0	N0 (i-)	T2	2406	0	IFN-gamma Dominant (Immune C2)
TCGA-GM-A2DC-01A	57	female	white	M0	N1a	T1c	2535	0	Inflammatory (Immune C3)
TCGA-GM-A2DD-01A	53	female	white	M0	N0 (i-)	T1c	2282	0	IFN-gamma Dominant (Immune C2)
TCGA-GM-A2DF-01A	53	female	black or african american	M0	N1a	T1c	2155	0	IFN-gamma Dominant (Immune C2)
TCGA-GM-A2DH-01A	58	female	white	M0	N0 (i+)	T1c	2193	0	IFN-gamma Dominant (Immune C2)
TCGA-GM-A2DI-01A	52	female	white	M0	N0 (i+)	T1c	2590	0	Inflammatory (Immune C3)
TCGA-GM-A2DI-11A	52	female	white	M0	N0 (i+)	T1c	2590	0	#N/A
TCGA-GM-A2DK-01A	58	female	white	M0	N0 (i-)	T1c	2645	0	Wound Healing (Immune C1)
TCGA-GM-A2DL-01A	50	female	white	M0	N0 (i-)	T1c	3519	0	Wound Healing (Immune C1)
TCGA-GM-A2DM-01A	57	female	white	M0	N0 (i-)	T2	3226	0	Inflammatory (Immune C3)
TCGA-GM-A2DN-01A	58	female	white	M0	N0 (i-)	T2	3091	0	IFN-gamma Dominant (Immune C2)
TCGA-GM-A2DO-01A	54	female	black or african american	M0	N0 (i-)	T1c	2596	0	IFN-gamma Dominant (Immune C2)
TCGA-GM-A3NW-01A	63	female	white	M0	N0 (i-)	T2	3361	0	Wound Healing (Immune C1)
TCGA-GM-A3NY-01A	72	female	white	M0	N1a	T2	1162	0	Wound Healing (Immune C1)
TCGA-GM-A3XG-01A	46	female	white	M0	N1a	T3	1330	0	Wound Healing (Immune C1)
TCGA-GM-A3XL-01A	49	female	black or african american	M0	N0 (i-)	T2	2108	0	IFN-gamma Dominant (Immune C2)
TCGA-GM-A3XN-01A	44	female	white	M0	N2a	T1c	2019	0	Wound Healing (Immune C1)
TCGA-GM-A4E0-01A	67	female	white	M0	N3a	T3	2191	0	Inflammatory (Immune C3)
TCGA-GM-A5PV-01A	63	female	white	M0	N1a	T2	412	0	Inflammatory (Immune C3)
TCGA-GM-A5PX-01A	65	female	white	M0	N1mi	T2	551	0	Inflammatory (Immune C3)
TCGA-HN-A2NL-01A	56	female	not reported	M0	N0	T2	79	0	IFN-gamma Dominant (Immune C2)
TCGA-HN-A2OB-01A	45	female	not reported	M0	N1	T2	1900	1	Inflammatory (Immune C3)
TCGA-JL-A3YW-01A	49	female	asian	M0	N1	T2	360	0	Wound Healing (Immune C1)
TCGA-JL-A3YX-01A	46	female	asian	M0	N0	T2	352	0	Wound Healing (Immune C1)
TCGA-LD-A66U-01A	44	female	white	MX	N1mi	T2	646	0	Wound Healing (Immune C1)
TCGA-LD-A74U-01A	79	female	white	M0	N3a	T3	402	0	TGF-beta Dominant (Immune C6)
TCGA-LD-A7W6-01A	54	female	white	M0	N1a	T2	404	0	IFN-gamma Dominant (Immune C2)
TCGA-LD-A9QF-01A	73	female	black or african american	M0	N0	T1c	323	0	IFN-gamma Dominant (Immune C2)
TCGA-LL-A440-01A	61	female	white	MX	N0 (i-)	T1c	759	0	TGF-beta Dominant (Immune C6)
TCGA-LL-A441-01A	62	female	black or african american	MX	N0	T1c	996	0	IFN-gamma Dominant (Immune C2)
TCGA-LL-A442-01A	56	female	black or african american	MX	N0 (i-)	T2	889	0	Lymphocyte Depleted (Immune C4)
TCGA-LL-A50Y-01A	84	female	white	MX	N0	T2	762	0	Wound Healing (Immune C1)
TCGA-LL-A5YL-01A	64	female	white	MX	N1a	T2	519	0	Wound Healing (Immune C1)
TCGA-LL-A5YM-01A	88	female	black or african american	M0	NX	T4b	394	0	Wound Healing (Immune C1)
TCGA-LL-A5YN-01A	46	female	black or african american	M0	N0 (i-)	T2	447	0	IFN-gamma Dominant (Immune C2)
TCGA-LL-A5YO-01A	50	female	black or african american	MX	N0	T1b	440	0	IFN-gamma Dominant (Immune C2)
TCGA-LL-A5YP-01A	49	female	black or african american	M0	N1a	T2	450	0	Wound Healing (Immune C1)
TCGA-LL-A6FP-01A	90	female	white	MX	NX	T2	1329	0	Lymphocyte Depleted (Immune C4)
TCGA-LL-A6FQ-01A	77	female	black or african american	MX	N2a	T2	80	0	IFN-gamma Dominant (Immune C2)
TCGA-LL-A6FR-01A	50	female	black or african american	MX	N0 (i-)	T2	489	0	IFN-gamma Dominant (Immune C2)
TCGA-LL-A73Y-01A	67	female	black or african american	MX	N0	T1c	477	0	Inflammatory (Immune C3)
TCGA-LL-A73Z-01A	55	female	black or african american	M1	NX	T1c	227	1	IFN-gamma Dominant (Immune C2)
TCGA-LL-A740-01A	61	female	black or african american	MX	N0 (i-)	T1c	441	0	Wound Healing (Immune C1)
TCGA-LL-A7SZ-01A	49	female	black or african american	MX	N1a	T2	594	0	IFN-gamma Dominant (Immune C2)
TCGA-LL-A7T0-01A	70	female	black or african american	M0	N1a	T2	376	0	IFN-gamma Dominant (Immune C2)
TCGA-LL-A8F5-01A	61	female	black or african american	MX	N0 (i-)	T2	596	0	IFN-gamma Dominant (Immune C2)
TCGA-LL-A9Q3-01A	69	female	white	MX	N3a	T3	532	0	Wound Healing (Immune C1)
TCGA-LQ-A4E4-01A	73	female	white	MX	N1a	T3	849	0	Wound Healing (Immune C1)
TCGA-MS-A51U-01A	44	female	white	M0	N1	T2	681	0	TGF-beta Dominant (Immune C6)
TCGA-OK-A5Q2-01A	59	female	not reported	MX	N1a	T2	64	0	Inflammatory (Immune C3)
TCGA-OL-A5D6-01A	71	female	black or african american	MX	N0	T2	1104	1	Wound Healing (Immune C1)
TCGA-OL-A5D7-01A	70	female	black or african american	MX	N0	T2	1780	0	IFN-gamma Dominant (Immune C2)
TCGA-OL-A5D8-01A	40	female	black or african american	MX	N0	T3	973	0	IFN-gamma Dominant (Immune C2)
TCGA-OL-A5DA-01A	61	female	white	MX	N0	T2	1783	0	Inflammatory (Immune C3)
TCGA-OL-A5RU-01A	63	female	black or african american	MX	N1	T1c	1219	0	Inflammatory (Immune C3)
TCGA-OL-A5RV-01A	43	female	black or african american	MX	N3	T2	1062	0	Inflammatory (Immune C3)
TCGA-OL-A5RW-01A	40	female	black or african american	MX	N1	T1c	1106	0	IFN-gamma Dominant (Immune C2)
TCGA-OL-A5RX-01A	51	female	black or african american	MX	N0	T1c	878	0	Inflammatory (Immune C3)
TCGA-OL-A5RY-01A	52	female	black or african american	MX	N1	T1c	752	0	Wound Healing (Immune C1)
TCGA-OL-A5RZ-01A	57	female	black or african american	MX	N0	T1b	679	0	Wound Healing (Immune C1)
TCGA-OL-A5S0-01A	66	female	black or african american	MX	N1a	T2	620	0	IFN-gamma Dominant (Immune C2)
TCGA-OL-A66H-01A	74	female	black or african american	MX	N1mi	T1c	812	0	IFN-gamma Dominant (Immune C2)
TCGA-OL-A66I-01A	36	female	black or african american	MX	N1mi	T1c	714	0	IFN-gamma Dominant (Immune C2)
TCGA-OL-A66J-01A	80	female	white	MX	N0	T1c	1996	0	Wound Healing (Immune C1)
TCGA-OL-A66K-01A	72	female	white	MX	N0	T2	1275	1	Inflammatory (Immune C3)
TCGA-OL-A66L-01A	71	female	black or african american	MX	N0	T1c	1301	0	Wound Healing (Immune C1)
TCGA-OL-A66N-01A	59	female	white	MX	N3	T3	792	0	Inflammatory (Immune C3)
TCGA-OL-A66O-01A	39	female	black or african american	MX	N1a	T2	528	0	IFN-gamma Dominant (Immune C2)
TCGA-OL-A66P-01A	75	female	black or african american	MX	N0	T2	428	0	IFN-gamma Dominant (Immune C2)
TCGA-OL-A6VO-01A	43	female	black or african american	MX	N0	T1c	858	0	IFN-gamma Dominant (Immune C2)
TCGA-OL-A6VQ-01A	49	female	white	MX	N0	T2	600	0	Inflammatory (Immune C3)
TCGA-OL-A6VR-01A	48	female	black or african american	MX	N0	T1b	1220	0	Lymphocyte Depleted (Immune C4)
TCGA-OL-A97C-01A	67	female	black or african american	M0	N0	T3	271	0	Wound Healing (Immune C1)
TCGA-PE-A5DC-01A	72	female	white	M0	N2a	T2	1430	1	IFN-gamma Dominant (Immune C2)
TCGA-PE-A5DD-01A	64	female	asian	M0	N0	T2	1953	0	Wound Healing (Immune C1)
TCGA-PE-A5DE-01A	41	female	white	M0	N0	T2	2645	0	IFN-gamma Dominant (Immune C2)
TCGA-PL-A8LV-01A	54	female	black or african american	M0	N0	T4	1329	0	Wound Healing (Immune C1)
TCGA-PL-A8LX-01A	35	female	black or african american	M1	N1a	T4	5	0	Lymphocyte Depleted (Immune C4)
TCGA-PL-A8LY-01A	30	female	black or african american	M0	N0	T3	8	0	Wound Healing (Immune C1)
TCGA-PL-A8LZ-01A	29	female	black or african american	M0	N2	T4b	302	0	IFN-gamma Dominant (Immune C2)
TCGA-S3-A6ZF-01A	64	female	black or african american	M0	N0	T2	572	0	IFN-gamma Dominant (Immune C2)
TCGA-S3-A6ZG-01A	71	female	black or african american	M0	N1	T2	562	0	Inflammatory (Immune C3)
TCGA-S3-A6ZH-01A	29	female	black or african american	MX	N3a	T3	641	0	Wound Healing (Immune C1)
TCGA-S3-AA0Z-01A	63	female	black or african american	M0	N1a	T2	629	0	IFN-gamma Dominant (Immune C2)
TCGA-S3-AA10-01A	65	female	black or african american	M0	N0	T2	586	0	IFN-gamma Dominant (Immune C2)
TCGA-S3-AA11-01A	67	female	black or african american	M0	N0	T2	421	0	Lymphocyte Depleted (Immune C4)
TCGA-S3-AA12-01A	82	female	black or african american	MX	N1a	T3	574	0	Inflammatory (Immune C3)
TCGA-S3-AA14-01A	47	female	black or african american	cM0 (i+)	N0 (i+)	T1	529	0	Wound Healing (Immune C1)
TCGA-S3-AA15-01A	51	female	black or african american	cM0 (i+)	N1a	T2	525	0	Wound Healing (Immune C1)
TCGA-S3-AA17-01A	64	female	black or african american	cM0 (i+)	N1mi	T2	424	0	IFN-gamma Dominant (Immune C2)
TCGA-UL-AAZ6-01A	73	female	black or african american	MX	N0	T2	518	0	IFN-gamma Dominant (Immune C2)
TCGA-UU-A93S-01A	63	female	black or african american	M1	N3b	T4d	116	1	IFN-gamma Dominant (Immune C2)
TCGA-V7-A7HQ-01A	75	female	black or african american	M0	N2a	T1c	2033	0	Wound Healing (Immune C1)
TCGA-W8-A86G-01A	66	female	white	MX	N0 (i-)	T2a	347	0	Inflammatory (Immune C3)
TCGA-WT-AB41-01A	55	female	black or african american	MX	N1mi	T2	1611	0	IFN-gamma Dominant (Immune C2)
TCGA-WT-AB44-01A	77	female	white	MX	N0 (i-)	T1c	883	0	Wound Healing (Immune C1)
TCGA-XX-A899-01A	46	female	white	MX	N2a	T1c	467	0	Inflammatory (Immune C3)
TCGA-XX-A899-11A	46	female	white	MX	N2a	T1c	467	0	#N/A
TCGA-XX-A89A-01A	68	female	white	MX	N0	T3	488	0	Inflammatory (Immune C3)
TCGA-Z7-A8R5-01A	61	female	white	MX	N1a	T3	3287	0	Wound Healing (Immune C1)
TCGA-Z7-A8R6-01A	46	female	white	M0	N0	T1c	3256	0	Wound Healing (Immune C1)
